# Supplementary material for: Catalytic enantioselective allene–anhydride approach to β,γ-unsaturated enones bearing an α-all-carbon-quarternary center
Source: Royal Society of Chemistry journal article supplement (doi:10.1039/d0sc03227a), 2020-01-01
Supplement: d0sc03227a1.pdf [file d0sc03227a1.pdf]

## Supporting Information

### Catalytic enantioselective allene-anhydride approach to $\beta,\gamma$ -unsaturated enones bearing an $\alpha$ -all-carbon-quaternary center

Yuan Yuan,<sup>a</sup> Xue Zhang,<sup>\*b</sup> Hui Qian,<sup>\*a</sup> and Shengming Ma<sup>\*a,b</sup>

<sup>a</sup> Research Center for Molecular Recognition and Synthesis, Department of Chemistry, Fudan University, 220 Handan Lu, Shanghai 200433, P. R. China

<sup>b</sup> State Key Laboratory of Organometallic Chemistry, Shanghai Institute of Organic Chemistry, Chinese Academy of Sciences, 345 Lingling Lu, Shanghai 200032, P. R. China.

E-mail: qian\_hui@fudan.edu.cn; masm@sioc.ac.cn

|                                          |          |
|------------------------------------------|----------|
| General information                      | S2       |
| Synthesis of 1,1-disubstituted allenes   | S3-S8    |
| Preparation of racemic products          | S8-S20   |
| Preparation of optically active products | S20-S39  |
| Synthetic applications                   | S40-S47  |
| DFT calculations                         | S48-S265 |
| References                               | S266     |

**General Information.** NMR spectra were taken with a Bruker Avance III spectrometer (400 MHz for  $^1\text{H}$  NMR, 100 MHz for  $^{13}\text{C}$  NMR, 376 MHz for  $^{19}\text{F}$  NMR) in  $\text{CDCl}_3$ . All  $^1\text{H}$  NMR experiments were measured with tetramethylsilane (0 ppm) in  $\text{CDCl}_3$ ;  $^{13}\text{C}$  NMR experiments were measured in relative to the signal of  $\text{CDCl}_3$  (77.0 ppm);  $^{19}\text{F}$  NMR experiments were measured in relative to the signal of  $\text{CFC}_3$  (0 ppm). The enantiomeric excess values were determined by chiral HPLC using an Agilent 1260 Infinity II instrument with the sepacific column. All reactions were carried out in oven-dried Schlenk tubes. Allenes were prepared according to the reported procedures.<sup>1,2</sup> Anhydrides were purchased from Macklin Co., Alfa Aesar, Bide Pharmatech Ltd. and used without purification.  $\text{Cu}(\text{OAc})_2$  was purchased from J&K Chemicals; (2*S*,5*S*)-1,2-Bis(diphenylphospholano)ethane and (2*R*,5*R*)-1,2-bis(diphenylphospholano)ethane (Ph-BPE) ligands were purchased from Laajoo Reagent and stored in a nitrogen filled glove box;  $(\text{MeO})_2\text{MeSiH}$  was purchased from TCI Chemicals. THF was dried over sodium wire with benzophenone as the indicator and distilled freshly before use. Petroleum ether (b.p. 60-90 °C) purchased from Shanghai Titan Scientific Co., Ltd. was used for chromatography.  $^1\text{H}$  NMR analysis of the crude products was conducted using dibromomethane or  $\text{CH}_3\text{NO}_2$  as the internal standard. Column chromatography was conducted on 300-400 mesh silica gel purchased from Huanghai chemicals or Biotage Isolera One flash chromatography purification system using flash silica gel columns purchased from Santai Tech. Inc.

## Experimental details and analytical data

### 1. Synthesis of 1,1-disubstituted allenes<sup>1,2</sup>

#### (1) Preparation of (Nona-1,2-dien-3-yl)benzene (**1a**) (Yy-3-080)<sup>1</sup>

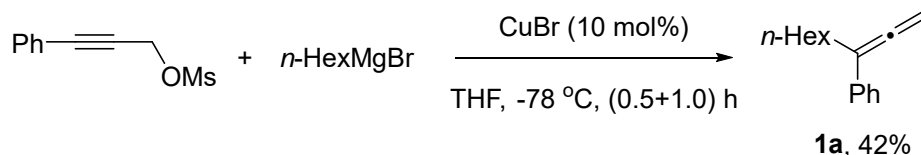

**Typical Procedure I:** To an oven-dried flask (100 mL) were added THF (30 mL), 3-phenylprop-2-yn-1-yl methanesulfonate (4.0788 g, 19.4 mmol) and CuBr (278.2 mg, 1.94 mmol) under argon. Then the resulting mixture was cooled to -78 °C followed by dropwise addition of freshly made *n*-hexylmagnesium bromide (1.0 M in THF, 25 mL, 25.0 mmol) over 0.5 h. The resulting mixture was stirred for 1 h at -78 °C and quenched with a saturated aqueous solution of NH<sub>4</sub>Cl (5 mL). After extraction with ethyl ether (40 mL x 3), the organic layer was combined and dried over anhydrous Na<sub>2</sub>SO<sub>4</sub>. After filtration and concentration under reduced pressure, the crude product was purified by column chromatography on silica gel to afford **1a**<sup>3</sup> (1.6245 g, 42% yield) (eluent: Petroleum ether) as a colorless oil; <sup>1</sup>H NMR (400 MHz, CDCl<sub>3</sub>) δ = 7.45-7.35 (d, *J* = 7.6 Hz, 2 H, Ar-H), 7.35-7.25 (t, *J* = 7.6 Hz, 2 H, Ar-H), 7.22-7.13 (t, *J* = 7.2 Hz, 1 H, Ar- H), 5.04 (t, *J* = 3.0 Hz, 2 H, =CH<sub>2</sub>), 2.40 (tt, *J*<sub>1</sub> = 7.6 Hz, *J*<sub>2</sub> = 3.6 Hz, 2 H, CH<sub>2</sub>), 1.62-1.48 (m, 2 H, CH<sub>2</sub>), 1.44-1.23 (m, 6 H, CH<sub>2</sub> x 3), 0.89 (t, *J* = 6.6 Hz, 3 H, CH<sub>3</sub>); <sup>13</sup>C NMR (100 MHz, CDCl<sub>3</sub>) δ = 208.6, 136.5, 128.3, 126.5, 126.0, 105.1, 78.0, 31.7, 29.5, 29.1, 27.8, 22.7, 14.1; IR (neat): ν = 2955, 2927, 2857, 1941, 1597, 1494, 1452, 1075 cm<sup>-1</sup>; MS (70 eV, EI) *m/z* (%): 201 (M<sup>+</sup>+1, 1.29), 200 (M<sup>+</sup>, 7.62), 130 (100).

#### (2) Preparation of (Hepta-1,2-dien-3-yl)benzene (**1b**) (Yy-3-157-1)<sup>1</sup>

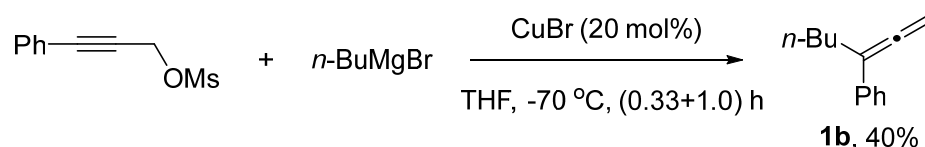

Following **Typical Procedure I:** The reaction of 3-phenylprop-2-ynyl methanesulfonate (3.0000 g, 14.0 mmol), CuBr (401.5 mg, 2.8 mmol) and *n*-butylmagnesium bromide (1.0 M in THF, 15 mL, 15.0 mmol) afforded **1b**<sup>4</sup> (0.9756

g, 40% yield) as colorless oil (eluent: Petroleum ether);  $^1\text{H NMR}$  (400 MHz,  $\text{CDCl}_3$ )  $\delta = 7.41$  (d,  $J = 7.6$  Hz, 2 H, Ar-H), 7.31 (t,  $J = 7.6$  Hz, 2 H, Ar-H), 7.19 (t,  $J = 7.2$  Hz, 1 H, Ar-H), 5.05 (s, 2 H,  $=\text{CH}_2$ ), 2.48-2.37 (m, 2 H,  $\text{CH}_2$ ), 1.60-1.48 (m, 2 H,  $\text{CH}_2$ ), 1.48-1.35 (m, 2 H,  $\text{CH}_2$ ), 0.93 (t,  $J = 7.4$  Hz, 3 H,  $\text{CH}_3$ );  $^{13}\text{C NMR}$  (100 MHz,  $\text{CDCl}_3$ )  $\delta = 208.6, 136.5, 128.3, 126.5, 126.0, 105.0, 78.0, 30.0, 29.2, 22.5, 14.0$ ; **IR** (neat):  $\nu = 3084, 3059, 3034, 2957, 2929, 2871, 2860, 1940, 1494, 1452$   $\text{cm}^{-1}$ ; **MS** (70 eV, EI)  $m/z$  (%): 172 ( $\text{M}^+$ , 11.06), 130 (100).

### (3) Preparation of (penta-1,2-dien-3-yl)benzene (**1c**) (Yy-3-180)<sup>1</sup>

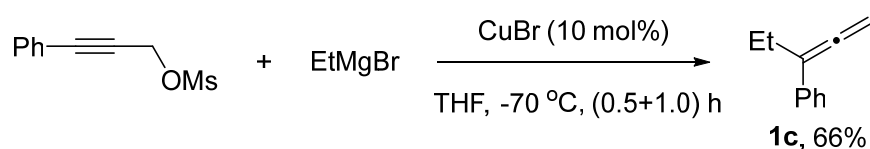

Following **Typical Procedure I**: The reaction of 3-phenylprop-2-ynyl methanesulfonate (3.1530 g, 15.0 mmol), CuBr (215.1 mg, 1.50 mmol) and ethylmagnesium bromide (1.0 M in THF, 20 mL, 20.0 mmol) afforded **1c**<sup>5</sup> (1.4341 g, 66% yield) (eluent: Petroleum ether) as a colorless oil;  $^1\text{H NMR}$  (400 MHz,  $\text{CDCl}_3$ )  $\delta = 7.40$  (d,  $J = 7.6$  Hz, 2 H, Ar-H), 7.30 (t,  $J = 7.6$  Hz, 2 H, Ar-H), 7.18 (t,  $J = 7.0$  Hz, 1 H, Ar-H), 5.09 (t,  $J = 3.6$  Hz, 2 H,  $=\text{CH}_2$ ), 2.48-2.36 (m, 2 H,  $\text{CH}_2$ ), 1.15 (t,  $J = 7.4$  Hz, 3 H,  $\text{CH}_3$ );  $^{13}\text{C NMR}$  (100 MHz,  $\text{CDCl}_3$ )  $\delta = 208.4, 136.5, 128.3, 126.5, 125.9, 106.7, 78.7, 22.4, 12.4$ ; **IR** (neat):  $\nu = 3084, 3059, 3034, 2969, 2933, 2910, 2875, 2847, 1941, 1596, 1493, 1452, 1379, 1075, 1031$   $\text{cm}^{-1}$ ; **MS** (70 eV, EI)  $m/z$  (%): 145 ( $\text{M}^++1$ , 5.87), 144 ( $\text{M}^+$ , 43.24), 115 (100).

### (4) Preparation of 2-(Nona-1,2-dien-3-yl)naphthalene (**1f**) (Yy-3-119-1)<sup>1</sup>

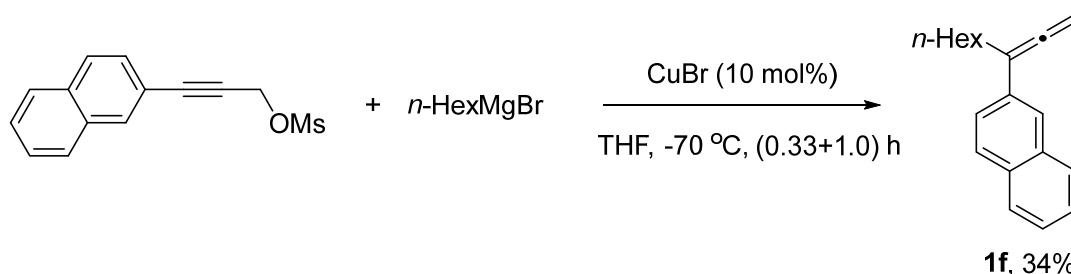

Following **Typical Procedure I**: The reaction of 3-(naphthalen-2-yl)prop-2-ynyl methanesulfonate (3.7366 g, 14.4 mmol), CuBr (206.5 mg, 1.44 mmol) and *n*-hexylmagnesium bromide (1.0 M in THF, 18.7 mL, 18.7 mmol) afforded **1f** (1.2060

g, 34% yield) as yellow oil (eluent: Petroleum ether); **<sup>1</sup>H NMR** (400 MHz, CDCl<sub>3</sub>)  $\delta$  = 7.84-7.66 (m, 4 H, Ar-H), 7.60 (d,  $J$  = 8.4 Hz, 1 H, Ar-H), 7.50-7.30 (m, 2 H, Ar-H), 5.11 (s, 2 H, =CH<sub>2</sub>), 2.50 (t,  $J$  = 7.2 Hz, 2 H, CH<sub>2</sub>), 1.70-7.52 (m, 2 H, CH<sub>2</sub>), 1.50-1.20 (m, 6 H, CH<sub>2</sub> x 3), 0.89 (t,  $J$  = 6.4 Hz, 3 H, CH<sub>3</sub>); **<sup>13</sup>C NMR** (100 MHz, CDCl<sub>3</sub>)  $\delta$  = 209.3, 133.9, 133.6, 132.4, 127.9, 127.7, 127.5, 126.0, 125.5, 125.3, 123.5, 105.3, 78.4, 31.8, 29.4, 29.2, 27.9, 22.7, 14.1; **IR** (neat):  $\nu$  = 3057, 2954, 2927, 2856, 1937, 1628, 1598, 1506, 1466, 1378, 1352, 1273, 1128 cm<sup>-1</sup>; **MS** (70 eV, EI)  $m/z$  (%): 251 (M<sup>+</sup>+1, 7.69) 250 (M<sup>+</sup>, 39.47), 180 (100); **HRMS** calcd. for C<sub>19</sub>H<sub>22</sub> (M<sup>+</sup>): 250.1722; Found: 250.1720.

**(5) Preparation of 3,5-diphenylbuta-1,2-diene (1e) (Yy-4-034, Yy-4-047)<sup>2</sup>**

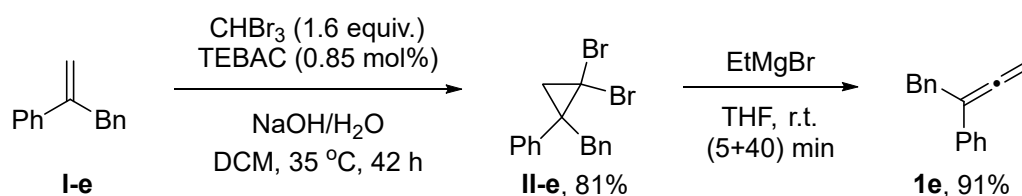

**Step 1:** To a solution of alkene **I-e** (4.8112 g, 25.0 mmol), bromoform (10.1150 g, d = 2.89 g/mL, 40.0 mmol), and benzyltriethylammonium chloride (TEBAC, 44.3 mg, 0.2125 mmol) in dichloromethane (100 mL) was added dropwise an aqueous solution of 50% NaOH (72 mL) followed by stirring at 35 °C until full conversion was observed as monitored by TLC (42 h). After the addition of H<sub>2</sub>O (50 mL) and DCM (50 mL), the aqueous phase was extracted with DCM (50 mL x 3). The combined organic phase was washed with a saturated NaCl solution (100 mL), dried over Na<sub>2</sub>SO<sub>4</sub>, filtrated and concentrated *in vacuo*. The crude product was purified by Biotage Isolera One flash chromatography purification system to afford **II-e** (7.3820 g, 81% yield) as a white solid: m.p. 102.1-102.8 °C (Petroleum ether/ CH<sub>2</sub>Cl<sub>2</sub>) (120 g silica column, eluent: Petroleum ether/ EtOAc = 100/1); **<sup>1</sup>H NMR** (400 MHz, CDCl<sub>3</sub>)  $\delta$  = 7.32-7.18 (m, 3 H, Ar-H), 7.17-7.00 (m, 5 H, Ar-H), 6.90-6.74 (m, 2 H, Ar-H), 3.48 (d,  $J$  = 13.6 Hz, 1 H, one proton of CH<sub>2</sub>), 3.09 (d,  $J$  = 14.0 Hz, 1 H, one proton of CH<sub>2</sub>), 2.12-1.98 (m, 2 H, CH<sub>2</sub>); **<sup>13</sup>C NMR** (100 MHz, CDCl<sub>3</sub>)  $\delta$  = 140.2, 137.9, 129.7, 129.4, 128.00, 127.99, 127.2, 126.5, 46.1, 41.1, 36.2, 32.7; **IR** (neat):  $\nu$  = 1494, 1444, 1072, 1013 cm<sup>-1</sup>; **MS** (70 eV, EI)  $m/z$  (%): 287 [M<sup>+</sup>(<sup>81</sup>Br)-Br, 17.57], 285

[M<sup>+</sup>(<sup>79</sup>Br)-Br, 17.65], 205 (100); **Anal.** calcd. for C<sub>16</sub>H<sub>14</sub>Br<sub>2</sub> (M<sup>+</sup>): C 52.49, H 3.85; Found: C 52.59, H 4.09.

**Step 2:** To a solution of **II-e** (3.6610 g, 10.0 mmol) in THF (20 ml) was added EtMgBr (1.0 M in THF, 15 mL, 15.0 mmol) dropwise under argon atmosphere at room temperature over 5 min. The resulting mixture was stirred at room temperature for an additional 40 minutes, quenched by saturated NH<sub>4</sub>Cl solution (20 ml), and extracted with petroleum ether (30 mL × 3). The combined organic layer was dried over anhydrous Na<sub>2</sub>SO<sub>4</sub>, filtrated and concentrated *in vacuo*. The crude product was purified by Biotage Isolera One flash chromatography purification system to afford **1e** (1.8719 g, 91% yield) as a yellow oil (80 g, silica gel column, eluent: Petroleum ether); <sup>1</sup>H NMR (400 MHz, CDCl<sub>3</sub>) δ = 7.41 (d, *J* = 7.6 Hz, 2 H, Ar-H), 7.32-7.24 (m, 6 H, Ar-H), 7.22-7.12 (m, 2 H, Ar-H), 5.03 (t, *J* = 2.4 Hz, 2 H, =CH<sub>2</sub>), 3.80 (t, *J* = 2.6 Hz, 2 H, CH<sub>2</sub>); <sup>13</sup>C NMR (100 MHz, CDCl<sub>3</sub>) δ = 209.8, 139.3, 135.8, 128.7, 128.3, 128.2, 126.6, 126.2, 104.1, 78.0, 36.7; **IR** (neat): ν = 3084, 3061, 3027, 2975, 1912, 2840, 1940, 1597, 1494, 1452, 1075, 1030, 1014 cm<sup>-1</sup>; **MS** (70 eV, EI) *m/z* (%): 207 (M<sup>+</sup>+1, 8.21), 206 (M<sup>+</sup>, 44.92), 91 (100).

**(6) Preparation of 4-(hexa-1,2-dien-3-yl)benzo[d][1,3]dioxole (1g) (Yy-4-037, Yy-4-053)<sup>2</sup>**

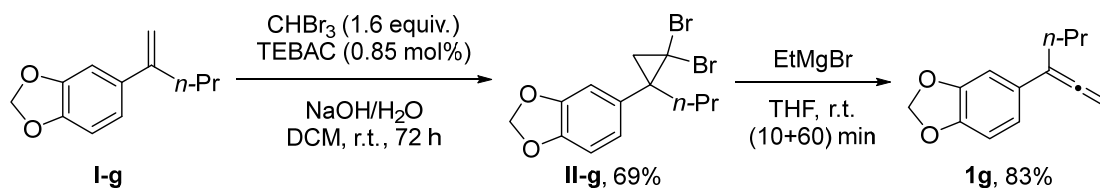

**Step 1:** To a solution of alkene **I-g**<sup>6</sup> (6.1845 g, 32.5 mmol), bromoform (13.2940 g, d = 2.89 g/mL, 52.6 mmol), and benzyltriethylammonium chloride (TEBAC, 60.6 mg, 0.272 mmol) in dichloromethane (128 mL) was added dropwise an aqueous solution of 50% NaOH (92 mL) followed by stirring at room temperature until full conversion was observed as monitored by TLC (72 h). After the addition of H<sub>2</sub>O (60 mL) and DCM (60 mL) the aqueous phase was extracted with DCM (60 mL × 3). The combined organic phase was washed with a saturated NaCl solution (120 mL), dried over Na<sub>2</sub>SO<sub>4</sub>, filtrated, and concentrated *in vacuo*. The crude product was purified by

Biotage Isolera One flash chromatography purification system to afford **II-g** (8.0084 g, 69% yield) as a yellow solid: m.p. 107.3-107.9 °C (Petroleum ether/ CH<sub>2</sub>Cl<sub>2</sub>) (120 g silica column, eluent: Petroleum ether/ EtOAc = 98/2 x 7 CV to 95/5 x 8 CV); <sup>1</sup>H NMR (400 MHz, CDCl<sub>3</sub>) δ = 6.80-6.75 (m, 2 H, CH<sub>3</sub>), 6.68 (dd, *J*<sub>1</sub> = 7.8 Hz, *J*<sub>2</sub> = 1.4 Hz, 1 H, Ar-H), 5.97 (dd, *J*<sub>1</sub> = 5.0 Hz, *J*<sub>2</sub> = 1.4 Hz, 2 H, Ar-H), 2.15-1.98 (m, 2 H, CH<sub>2</sub>), 1.71 (d, *J* = 7.6 Hz, 1 H, one proton of CH<sub>2</sub>), 1.59-1.54 (m, 1 H, one proton of CH<sub>2</sub>), 1.32-1.18 (m, 2 H, CH<sub>2</sub>), 0.85 (t, *J* = 7.4 Hz, 3 H, CH<sub>3</sub>); <sup>13</sup>C NMR (100 MHz, CDCl<sub>3</sub>) δ = 147.4, 146.6, 134.5, 122.5, 109.7, 107.9, 101.1, 42.5, 39.6, 36.9, 33.4, 20.5, 13.9; IR (neat): ν = 2956, 2906, 2872, 2857, 1489, 1457, 1441, 1356, 1240, 1221, 1112, 1069, 1056, 1037, 1011 cm<sup>-1</sup>; MS (70 eV, EI) *m/z* (%): 283 [M(<sup>81</sup>Br)<sup>+</sup>-Br, 53.33], 281 [M(<sup>79</sup>Br)<sup>+</sup>-Br, 53.76], 172 (100); Anal. calcd. for C<sub>13</sub>H<sub>14</sub>Br<sub>2</sub>O<sub>2</sub> (M<sup>+</sup>): C 43.13, H 3.90; Found: C 43.31, H 4.16.

**Step 2:** To a solution of **II-g** (3.6211 g, 10.0 mmol) in THF (20 ml) was added EtMgBr (1.0 M in THF, 15 mL, 15.0 mmol) dropwise under argon atmosphere at room temperature for 10 min. The resulting mixture was stirred at room temperature for an additional 60 minutes, quenched by saturated NH<sub>4</sub>Cl solution (20 ml), and extracted with petroleum ether (30 mL × 3). The combined organic layer was dried over anhydrous Na<sub>2</sub>SO<sub>4</sub>, filtrated and concentrated *in vacuo*. The crude product was purified by Biotage Isolera One flash chromatography purification system to afford **Ig** (1.6820 g, 83% yield) as a colorless oil (40 g, silica gel column, eluent: Petroleum ether/ EtOAc = 49/1 (500 mL)); <sup>1</sup>H NMR (400 MHz, CDCl<sub>3</sub>) δ = 6.92 (d, *J* = 1.6 Hz, 1 H, Ar-H), 6.85 (dd, *J*<sub>1</sub> = 8.2 Hz, *J*<sub>2</sub> = 1.8 Hz, 1 H, Ar-H), 6.76 (d, *J* = 8.0 Hz, 1 H, Ar-H), 5.92 (s, 2 H, CH<sub>2</sub>), 5.03 (t, *J* = 3.2 Hz, 2 H, =CH<sub>2</sub>), 2.38-2.29 (m, 2 H, CH<sub>2</sub>), 1.56 (sextet, *J* = 7.4 Hz, 2 H, CH<sub>2</sub>), 0.97 (s, *J* = 7.4 Hz, 3 H, CH<sub>3</sub>); <sup>13</sup>C NMR (100 MHz, CDCl<sub>3</sub>) δ = 208.4, 147.8, 146.3, 130.6, 119.0, 108.0, 106.8, 104.6, 100.9, 78.0, 31.9, 21.1, 13.9; IR (neat): ν = 2959, 2930, 2895, 2872, 1938, 1607, 1503, 1486, 1437, 1378, 1350, 1236, 1109, 1038 cm<sup>-1</sup>; MS (70 eV, EI) *m/z* (%): 203 (M<sup>+</sup>+1, 14.43), 202 (M<sup>+</sup>, 100); HRMS calcd. *m/z* for C<sub>13</sub>H<sub>14</sub>O<sub>2</sub> (M<sup>+</sup>): 202.0988; Found: 202.0987.

### 3. Preparation of racemic products

#### (1) Preparation of 1,2-diphenyl-2-hexylbut-3-en-1-one (3aa) (Yy-3-133, Yy-4-183)

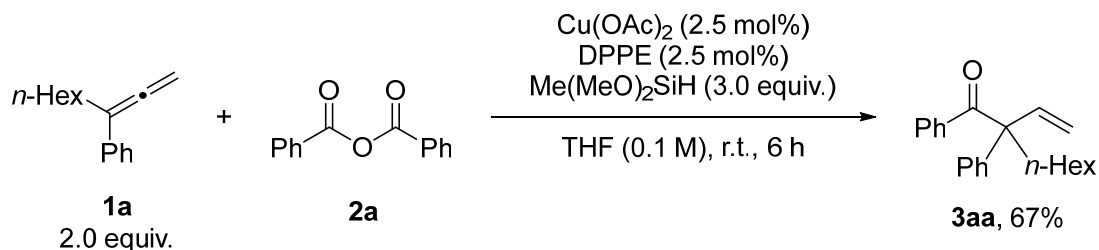

**Typical Procedure II:** To an oven-dried 25 mL Schlenk tube were sequentially added a stirring bar, benzoic anhydride **2a** (113.1 mg, 0.5 mmol),  $\text{Cu(OAc)}_2$  (2.3 mg, 0.0127 mmol), DPPE (5.0 mg, 0.0125 mmol), allene **1a** (200.3 mg, 1.0 mmol), and THF (4 mL) under nitrogen. After being stirred at room temperature for 5 min, dimethoxymethylsilane (163.6 mg,  $d = 0.861$  g/mL, 0.19 mL, 1.5 mmol, diluted with 1 mL THF) was added. The resulting mixture was stirred at room temperature for 6 h and quenched with a saturated solution of  $\text{NH}_4\text{F}$  in methanol (2.5 mL). The reaction mixture was stirred for 15 min at room temperature and then filtered through a short plug of celite eluted with EtOAc (10 mL x 3). The solvent was removed *in vacuo* and the crude product was purified by column chromatography on silica gel to afford **3aa** (102.6 mg, 67% yield) as a colorless oil (eluent: Petroleum ether x 200 mL to Petroleum ether/ EtOAc = 100/1 (~800 mL));  $^1\text{H NMR}$  (400 MHz,  $\text{CDCl}_3$ )  $\delta = 7.53$  (d,  $J = 8.0$  Hz, 2 H, Ar-H), 7.40-7.28 (m, 3 H, Ar-H), 7.28-7.15 (m, 5 H, Ar-H), 6.70 (dd,  $J_1 = 17.6$  Hz,  $J_2 = 10.8$  Hz, 1 H, =CH), 5.30 (d,  $J = 11.2$  Hz, 1 H, one proton of =CH<sub>2</sub>), 4.99 (d,  $J = 17.6$  Hz, 1 H, one proton of =CH<sub>2</sub>), 2.28-2.05 (m, 2 H, CH<sub>2</sub>), 1.28-0.94 (m, 8 H, CH<sub>2</sub> x 4), 0.81 (t,  $J = 6.6$  Hz, 3 H, CH<sub>3</sub>);  $^{13}\text{C NMR}$  (100 MHz,  $\text{CDCl}_3$ )  $\delta = 200.6, 142.6, 139.7, 136.3, 131.7, 130.0, 128.7, 127.8, 127.1, 126.8, 117.2, 61.5, 38.7, 31.5, 29.8, 23.9, 22.5, 14.0$ ; IR (neat):  $\nu = 3087, 3061, 3027, 2953, 2928, 2857, 1676, 1597, 1579, 1495, 1466, 1446, 1227, 1180$   $\text{cm}^{-1}$ ; MS (70 eV, EI)  $m/z$  (%): 306 ( $\text{M}^+$ , 1.90), 105 (100); HRMS calcd.  $m/z$  for  $\text{C}_{22}\text{H}_{26}\text{O}$  ( $\text{M}^+$ ): 306.1978; Found: 306.1978.

## (2) Preparation of 1,2-diphenyl-2-butylbut-3-en-1-one (**3ba**) (Yy-3-161)



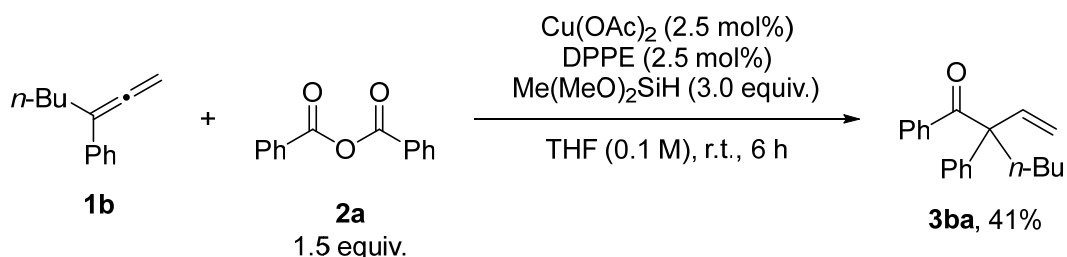

Following **Typical Procedure II**, the reaction of benzoic anhydride **2a** (169.7 mg, 0.75 mmol),  $\text{Cu(OAc)}_2$  (2.3 mg, 0.0127 mmol), DPPE (5.0 mg, 0.0125 mmol), allene **1b** (125.2 mg, 0.5 mmol) in THF (4 mL), and dimethoxymethylsilane (163.6 mg, d = 0.861 g/mL, 0.19 mL, 1.5 mmol, in 1 mL THF) afforded **3ba** (58.0 mg, 98% purity, 41% yield) as a colorless oil (eluent: Petroleum ether (200 mL) to Petroleum ether/EtOAc = 100/1 (~ 500 mL)); **<sup>1</sup>H NMR** (400 MHz,  $\text{CDCl}_3$ )  $\delta$  = 7.53 (d,  $J$  = 7.6 Hz, 2 H, Ar-H), 7.36-7.28 (m, 3 H, Ar-H), 7.28-7.14 (m, 5 H, Ar-H), 6.70 (dd,  $J_1$  = 17.6 Hz,  $J_2$  = 11.2 Hz, 1 H, =CH), 5.30 (d,  $J$  = 10.8 Hz, 1 H, one proton of =CH<sub>2</sub>), 5.00 (d,  $J$  = 17.6 Hz, 1 H, one proton of =CH<sub>2</sub>), 2.30-2.08 (m, 2 H, CH<sub>2</sub>), 1.30-1.15 (m, 2 H, CH<sub>2</sub>), 1.15-0.90 (m, 2 H, CH<sub>2</sub>), 0.78 (t,  $J$  = 7.2 Hz, 3 H, CH<sub>3</sub>); **<sup>13</sup>C NMR** (100 MHz,  $\text{CDCl}_3$ )  $\delta$  = 200.5, 142.6, 139.6, 136.3, 131.7, 130.0, 128.7, 127.8, 127.1, 126.8, 117.2, 61.4, 38.5, 26.2, 23.2, 13.8; **IR** (neat):  $\nu$  = 3086, 3059, 3024, 2955, 2931, 2871, 2862, 1675, 1597, 1579, 1495, 1446, 1225, 1181, 1003  $\text{cm}^{-1}$ ; **MS** (70 eV, EI)  $m/z$  (%): 278 ( $\text{M}^+$ , 2.79), 105 (100); **HRMS** calcd.  $m/z$  for  $\text{C}_{20}\text{H}_{22}\text{O}$  ( $\text{M}^+$ ): 278.1665; Found: 278.1666.

### (3) Preparation of 2-ethyl-1,2-diphenylbut-3-en-1-one (**3ca**) (**Yy-3-184**)

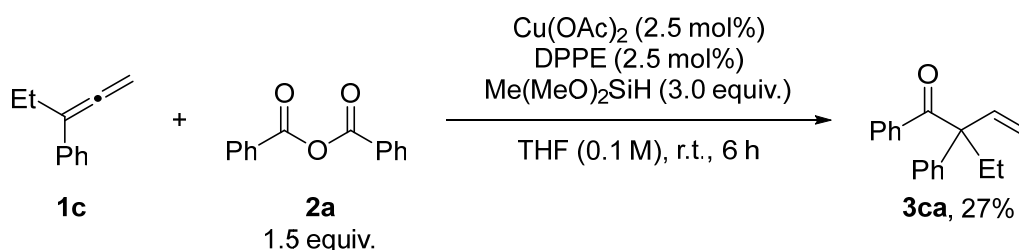

Following **Typical Procedure II**, the reaction of benzoic anhydride **2a** (339.4 mg, 1.5 mmol),  $\text{Cu(OAc)}_2$  (4.5 mg, 0.025 mmol), DPPE (10.0 mg, 0.025 mmol), allene **1c** (144.3 mg, 1.0 mmol) in THF (8 mL), and dimethoxymethylsilane (318.6 mg, d = 0.861 g/mL, 0.37 mL, 3.0 mmol, in 2 mL THF) afforded **3ca** (71.4 mg, 96% purity, 27% yield) as a colorless oil (eluent: Petroleum ether (200 mL) to Petroleum ether/

EtOAc = 100/1 (~ 800 mL)); <sup>1</sup>H NMR (400 MHz, CDCl<sub>3</sub>) δ = 7.58-7.48 (m, 2 H, Ar-H), 7.38-7.28 (m, 3 H, Ar-H), 7.28-7.15 (m, 5 H, Ar-H), 6.69 (dd, *J*<sub>1</sub> = 17.6 Hz, *J*<sub>2</sub> = 10.8 Hz, 1 H, =CH), 5.32(d, *J* = 10.8 Hz, 1 H, one proton of =CH<sub>2</sub>), 5.02 (d, *J* = 17.6 Hz, 1 H, one proton of =CH<sub>2</sub>), 2.34-2.10 (m, 2 H, CH<sub>2</sub>), 0.71 (t, *J* = 7.4 Hz, 3 H, CH<sub>3</sub>); <sup>13</sup>C NMR (100 MHz, CDCl<sub>3</sub>) δ = 200.5, 142.4, 139.1, 136.3, 131.7, 130.0, 128.7, 127.8, 127.2, 126.8, 117.5, 61.8, 31.5, 8.6; IR (neat): ν = 3085, 3059, 3024, 2971, 2937, 2879, 1673, 1597, 1578, 1494, 1446, 1227, 1181, 1003 cm<sup>-1</sup>; MS (70 eV, EI) *m/z* (%): 250 (M<sup>+</sup>, 1.36), 105 (100); HRMS calcd. *m/z* for C<sub>18</sub>H<sub>18</sub>O (M<sup>+</sup>): 250.1352; Found: 250.1350.

#### (4) Preparation of 2-methyl-1,2-diphenylbut-3-en-1-one (3da) (Yy-4-055)

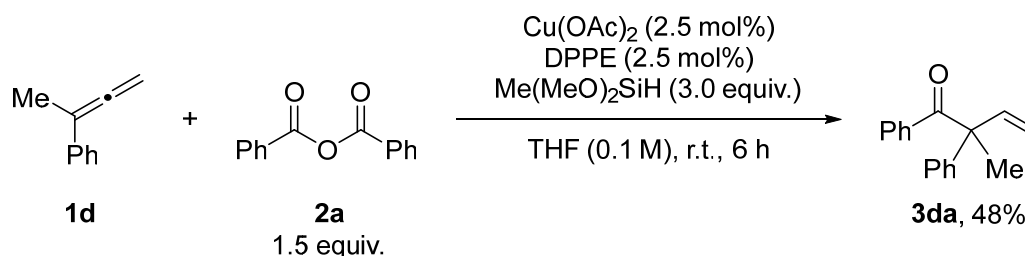

Following **Typical Procedure II**, the reaction of benzoic anhydride **2a** (169.7 mg, 0.75 mmol), Cu(OAc)<sub>2</sub> (2.3 mg, 0.0127 mmol), DPPE (5.0 mg, 0.0125 mmol), allene **1d** (65.3 mg, 0.5 mmol) in THF (4 mL), and dimethoxymethylsilane (163.6 mg, d = 0.861 g/mL, 0.19 mL, 1.5 mmol, in 1 mL THF) afforded **3da**<sup>7</sup> (56.7 mg, 48% yield) as a colorless oil (eluent: Petroleum ether (200 mL) to Petroleum ether/ EtOAc = 100/1 (~ 600 mL)); <sup>1</sup>H NMR (400 MHz, CDCl<sub>3</sub>) δ = 7.60-7.50 (m, 2 H, Ar-H), 7.40-7.30 (m, 3 H, Ar-H), 7.30-7.18 (m, 5 H, Ar-H), 6.62 (dd, *J*<sub>1</sub> = 17.2 Hz, *J*<sub>2</sub> = 10.8 Hz, 1 H, =CH), 5.29 (d, *J* = 10.8 Hz, 1 H, one proton of =CH<sub>2</sub>), 5.16 (d, *J* = 17.6 Hz, 1 H, one proton of =CH<sub>2</sub>), 1.67 (s, 3 H, CH<sub>3</sub>); <sup>13</sup>C NMR (100 MHz, CDCl<sub>3</sub>) δ = 200.8, 144.4, 140.9, 136.2, 131.8, 130.0, 129.0, 127.9, 126.9, 126.4, 116.5, 58.5, 25.9; IR (neat): ν = 3086, 3059, 3024, 2985, 2934, 1677, 1597, 1493, 1446, 1409, 1368, 1237, 1174, 1077, 1011 cm<sup>-1</sup>; MS (70 eV, EI) *m/z* (%): 236 (M<sup>+</sup>, 1.85), 105 (100).

#### (5) Preparation of 2-benzyl-1,2-diphenylbut-3-en-1-one (3ea) (Yy-4-049)

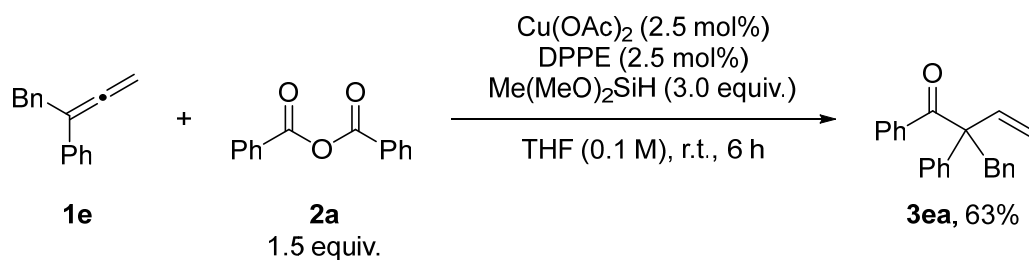

Following **Typical Procedure II**, the reaction of benzoic anhydride **2a** (169.7 mg, 0.75 mmol),  $\text{Cu(OAc)}_2$  (2.3 mg, 0.0127 mmol), DPPE (5.1 mg, 0.0128 mmol), allene **1e** (102.9 mg, 0.5 mmol) in THF (4 mL), and dimethoxymethylsilane (163.6 mg, d = 0.861 g/mL, 0.19 mL, 1.5 mmol, in 1 mL THF) afforded **3ea** (98.1 mg, 63% yield) as a colorless oil (eluent: Petroleum ether (200 mL) to Petroleum ether/ EtOAc = 100/1 (~ 400 mL));  $^1\text{H NMR}$  (400 MHz,  $\text{CDCl}_3$ )  $\delta$  = 7.62 (d,  $J$  = 7.6 Hz, 2 H, Ar-H), 7.32 (t,  $J$  = 7.2 Hz, 1 H, Ar-H), 7.28-7.13 (m, 5 H, Ar-H), 7.13-6.90 (m, 5 H, Ar-H), 6.68-6.52 (m, 3 H, =CH and Ar-H), 5.39 (d,  $J$  = 10.8 Hz, 1 H, one proton of =CH<sub>2</sub>), 5.14 (d,  $J$  = 17.6 Hz, 1 H, one proton of =CH<sub>2</sub>), 3.48 (q,  $J$  = 13.5 Hz, 2 H, CH<sub>2</sub>);  $^{13}\text{C NMR}$  (100 MHz,  $\text{CDCl}_3$ )  $\delta$  = 199.8, 141.6, 139.3, 136.9, 135.7, 131.8, 131.2, 130.6, 128.5, 127.7, 127.5, 127.2, 126.9, 126.1, 118.5, 62.2, 47.3; **IR** (neat):  $\nu$  = 3080, 3060, 30225, 2973, 2925, 1668, 1597, 1579, 1495, 1448, 1226, 1181, 1118, 1079, 1012  $\text{cm}^{-1}$ ; **MS** (70 eV, EI)  $m/z$  (%): 313 ( $\text{M}^+ + 1$ , 4.08), 312 ( $\text{M}^+$ , 16.18), 105 (100); **HRMS** calcd.  $m/z$  for  $\text{C}_{23}\text{H}_{20}\text{O}$  ( $\text{M}^+$ ): 312.1509; Found: 312.1509.

**(6) Preparation of 2-(Naphth-2-yl)-1-phenyl-2-hexyl-3-buten-1-one (3fa) (Yy-3-135)**

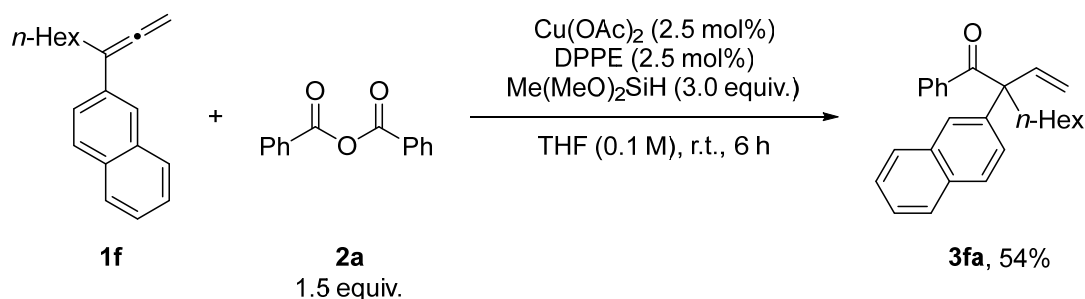

Following **Typical Procedure II**, the reaction of benzoic anhydride **2a** (169.7 mg, 0.75 mmol),  $\text{Cu(OAc)}_2$  (2.3 mg, 0.0127 mmol), DPPE (5.0 mg, 0.0125 mmol), allene **1f** (125.2 mg, 0.5 mmol) in THF (4 mL), and dimethoxymethylsilane (163.6 mg, d =

0.861 g/mL, 0.19 mL, 1.5 mmol, in 1 mL THF) afforded **3fa** (96.6 mg, 54% yield) as a colorless oil (eluent: Petroleum ether (400 mL) to Petroleum ether/ EtOAc = 100/1 (~ 200 mL)); <sup>1</sup>H NMR (400 MHz, CDCl<sub>3</sub>) δ = 7.88-7.70 (m, 4 H, Ar-H), 7.56 (d, *J* = 8.0 Hz, 2 H, Ar-H), 7.52-7.40 (m, 2 H, Ar-H), 7.28 (d, *J* = 8.0 Hz, 2 H, Ar-H), 7.14 (t, *J* = 7.6 Hz, 2 H, Ar-H), 6.82 (dd, *J*<sub>1</sub> = 17.6 Hz, *J*<sub>2</sub> = 11.2 Hz, 1 H, =CH), 5.34 (d, *J* = 10.8 Hz, 1 H, one proton of =CH<sub>2</sub>), 5.03 (d, *J* = 17.6 Hz, 1 H, one proton of =CH<sub>2</sub>), 2.40-2.18 (m, 2 H, CH<sub>2</sub>), 1.24-0.95 (m, 8 H, CH<sub>2</sub> x 4), 0.78 (t, *J* = 6.6 Hz, 3 H, CH<sub>3</sub>); <sup>13</sup>C NMR (100 MHz, CDCl<sub>3</sub>) δ = 200.6, 140.2, 139.7, 136.4, 133.5, 132.3, 131.7, 130.0, 128.5, 128.1, 127.9, 127.6, 126.2, 125.9, 125.7, 125.5, 117.4, 61.6, 38.7, 31.5, 29.8, 24.0, 22.5, 14.0; IR (neat): ν = 3060, 2953, 2856, 1676, 1631, 1597, 1579, 1506, 1466, 1446, 1223, 1181 cm<sup>-1</sup>; MS (70 eV, EI) *m/z* (%): 357 (M<sup>+</sup>+1, 2.41), 356 (M<sup>+</sup>, 8.41), 105 (100); HRMS calcd. for C<sub>26</sub>H<sub>29</sub>O (M+H<sup>+</sup>): 357.2213; Found: 357.2210.

**(7) Preparation of 2-(benzo[d][1,3]dioxol-5-yl)-1-phenyl-2-propyl-3-buten-1-one (3ga) (Yy-4-061)**

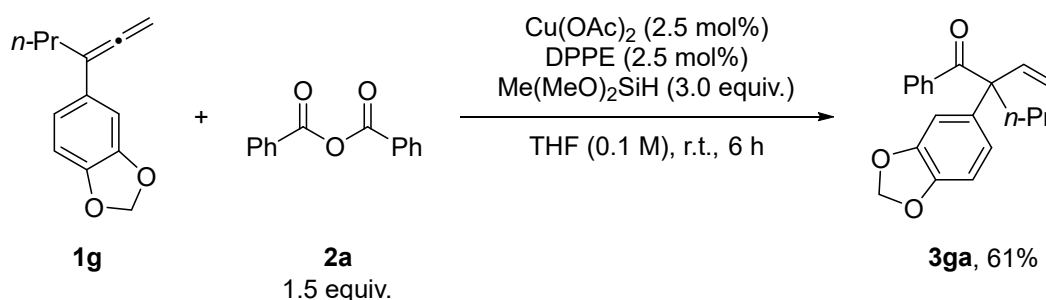

Following **Typical Procedure II**, the reaction of benzoic anhydride **2a** (169.7 mg, 0.75 mmol), Cu(OAc)<sub>2</sub> (2.3 mg, 0.0127 mmol), DPPE (5.0 mg, 0.0125 mmol), allene **1g** (103.1 mg, 0.5 mmol) in THF (4 mL), and dimethoxymethylsilane (163.6 mg, d = 0.861 g/mL, 0.19 mL, 1.5 mmol, in 1 mL THF) afforded **3ga** (96.0 mg, 61% yield) as a colorless oil (eluent: Petroleum ether (200 mL) to Petroleum ether/ EtOAc = 100/1 (~ 200 mL) to 50/1 (~ 400 mL)); <sup>1</sup>H NMR (400 MHz, CDCl<sub>3</sub>) δ = 7.58 (d, *J* = 8.0 Hz, 2 H, Ar-H), 7.35 (t, *J* = 7.0 Hz, 1 H, Ar-H), 7.23 (t, *J* = 7.6 Hz, 2 H, Ar-H), 6.80-6.68 (m, 3 H, Ar-H), 6.63 (dd, *J*<sub>1</sub> = 17.6 Hz, *J*<sub>2</sub> = 10.8 Hz, 1 H, =CH), 6.00-5.88 (m, 2 H, CH<sub>2</sub>), 5.27 (d, *J* = 10.8 Hz, 1 H, one proton of =CH<sub>2</sub>), 5.00 (d, *J* = 17.6 Hz, 1 H, one proton of =CH<sub>2</sub>), 2.22-2.00 (m, 2 H, CH<sub>2</sub>), 1.20-1.00 (m, 2 H, CH<sub>2</sub>), 0.83 (t, *J* = 7.2

Hz, 3 H, CH<sub>3</sub>); <sup>13</sup>C NMR (100 MHz, CDCl<sub>3</sub>) δ = 200.3, 148.1, 146.4, 139.7, 136.4, 136.3, 131.7, 129.9, 127.8, 120.4, 117.1, 108.4, 107.6, 101.1, 61.1, 40.9, 17.4, 14.6; IR (neat): ν = 3067, 3022, 2959, 2931, 2872, 1676, 1596, 1504, 1485, 1436, 1340, 1233, 1182, 1112, 1038 cm<sup>-1</sup>; MS (70 eV, EI) *m/z* (%): 309 (M<sup>+</sup>+1, 3.93), 308 (M<sup>+</sup>, 19.30), 203 (100); HRMS calcd. *m/z* for C<sub>20</sub>H<sub>20</sub>O<sub>3</sub> (M<sup>+</sup>): 308.1407; Found: 308.1410.

**(8) Preparation of 2-methyl-1-phenyl-2-(*p*-tolyl)but-3-en-1-one (3ha) (Yy-4-081)**

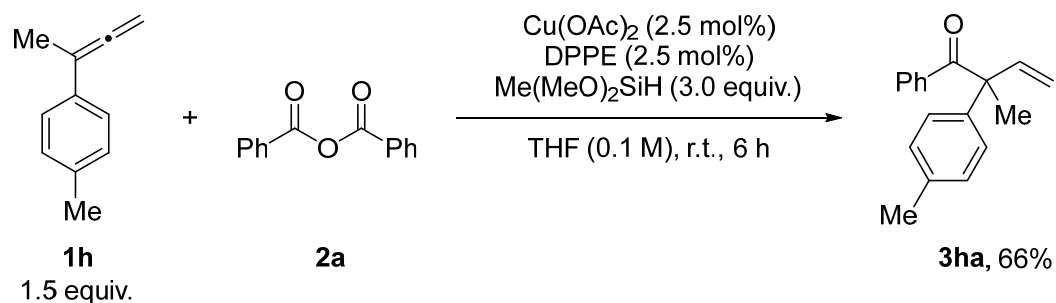

Following **Typical Procedure II**, the reaction of benzoic anhydride **2a** (113.1 mg, 0.50 mmol), Cu(OAc)<sub>2</sub> (2.3 mg, 0.0127 mmol), DPPE (5.0 mg, 0.0125 mmol), allene **1h** (108.2 mg, 0.75 mmol) in THF (4 mL), and dimethoxymethylsilane (163.6 mg, d = 0.861 g/mL, 0.19 mL, 1.5 mmol, in 1 mL THF) afforded **3ha** (82.4 mg, 66% yield) as a colorless oil (eluent: Petroleum ether (200 mL) to petroleum ether/ EtOAc = 100/1 (~ 600 mL)); <sup>1</sup>H NMR (400 MHz, CDCl<sub>3</sub>) δ = 7.60-7.50 (m, 2 H, Ar-H), 7.35 (t, *J* = 7.4 Hz, 1 H, Ar-H), 7.22 (t, *J* = 7.8 Hz, 2 H, Ar-H), 7.18-7.10 (m, 4 H, Ar-H), 6.60 (dd, *J*<sub>1</sub> = 17.2 Hz, *J*<sub>2</sub> = 10.8 Hz, 1 H, =CH), 5.26 (d, *J* = 10.8 Hz, 1 H, one proton of =CH<sub>2</sub>), 5.14 (d, *J* = 17.6 Hz, 1 H, one proton of =CH<sub>2</sub>), 2.32 (s, 3 H, CH<sub>3</sub>), 1.65 (s, 3 H, CH<sub>3</sub>); <sup>13</sup>C NMR (100 MHz, CDCl<sub>3</sub>) δ = 201.0, 141.3, 141.2, 136.5, 136.3, 131.7, 130.0, 129.7, 127.9, 126.2, 116.3, 58.1, 25.9, 21.0; IR (neat): ν = 3056, 3020, 2989, 2922, 1672, 1596, 1577, 1509, 1445, 1406, 1365, 1241, 1171, 1076, 1009 cm<sup>-1</sup>; MS (70 eV, EI) *m/z* (%): 250 (M<sup>+</sup>, 3.56), 105 (100); HRMS calcd. *m/z* for C<sub>18</sub>H<sub>18</sub>O (M<sup>+</sup>): 250.1352; Found: 250.1357.

**(9) Preparation of 2-(3-methoxyphenyl)-2-methyl-1-phenylbut-3-en-1-one (3ia) (Yy-4-083)**

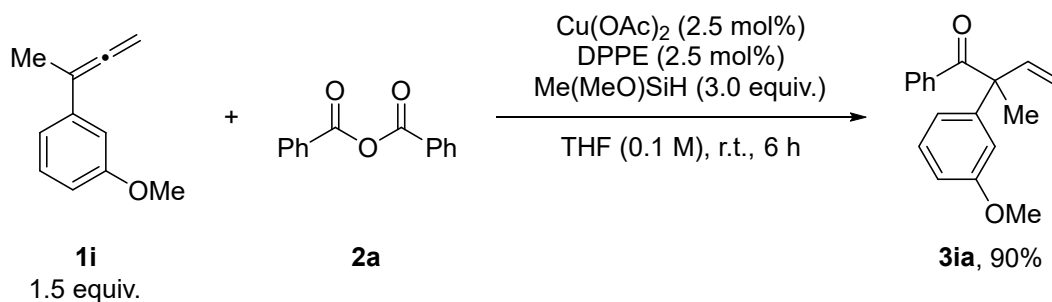

Following **Typical Procedure II**, the reaction of benzoic anhydride **2a** (113.1 mg, 0.50 mmol),  $\text{Cu(OAc)}_2$  (2.3 mg, 0.0127 mmol), DPPE (5.0 mg, 0.0125 mmol), allene **1i** (120.3 mg, 0.75 mmol) in THF (4 mL), and dimethoxymethylsilane (163.6 mg, d = 0.861 g/mL, 0.19 mL, 1.5 mmol, in 1 mL THF) afforded **3ia** (119.9 mg, 90% yield) as a colorless oil (eluent: Petroleum ether (200 mL) to Petroleum ether/ EtOAc = 100/1 (~ 200 mL) to 50/1 (~ 400 mL));  $^1\text{H NMR}$  (400 MHz,  $\text{CDCl}_3$ )  $\delta$  = 7.60-7.52 (m, 2 H, Ar-H), 7.40-7.33 (m, 1 H, Ar-H), 7.26-7.20 (m, 3 H, Ar-H), 6.88-6.82 (m, 2 H, Ar-H), 6.88-6.77 (m, 1 H, Ar-H), 6.60 (dd,  $J_1 = 17.2$  Hz,  $J_2 = 10.8$  Hz, 1 H, =CH), 5.28 (d,  $J = 10.8$  Hz, 1 H, one proton of = $\text{CH}_2$ ), 5.16 (d,  $J = 17.2$  Hz, 1 H, one proton of = $\text{CH}_2$ ), 3.75 (s, 3 H,  $\text{OCH}_3$ ), 1.66 (s, 3 H,  $\text{CH}_3$ );  $^{13}\text{C NMR}$  (100 MHz,  $\text{CDCl}_3$ )  $\delta$  = 200.6, 160.0, 146.0, 140.8, 136.2, 131.8, 129.93, 129.91, 127.9, 118.9, 116.5, 112.4, 111.9, 58.4, 55.1, 25.7; **IR** (neat):  $\nu = 3058, 2987, 2936, 2835, 1677, 1596, 1580, 1485, 1433, 1409, 1317, 1290, 1239, 1169, 1073, 1046, 1013$   $\text{cm}^{-1}$ ; **MS** (70 eV, EI)  $m/z$  (%): 267 ( $\text{M}^+ + 1$ , 1.55), 266 ( $\text{M}^+$ , 6.90), 105 (100); **HRMS** calcd.  $m/z$  for  $\text{C}_{18}\text{H}_{18}\text{O}_2$  ( $\text{M}^+$ ): 266.1301; Found: 266.1308.

**(10) Preparation of 2-(4-chlorophenyl)-2-methyl-1-phenylbut-3-en-1-one (3ja) (Yy-4-089)**

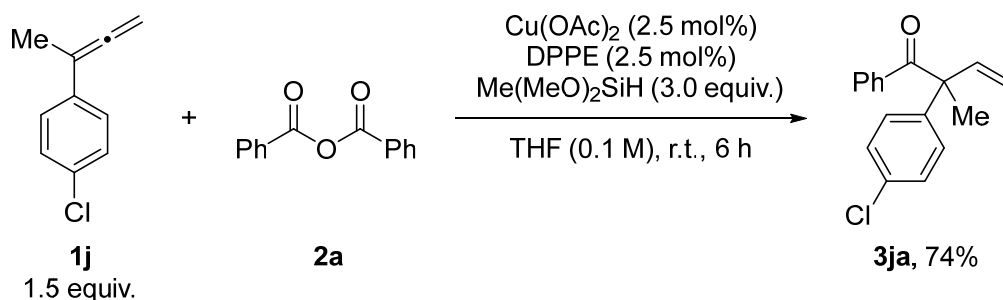

Following **Typical Procedure III**, the reaction of benzoic anhydride **2a** (113.1 mg, 0.50 mmol),  $\text{Cu(OAc)}_2$  (2.3 mg, 0.0127 mmol), DPPE (5.0 mg, 0.0125 mmol), allene

**1j** (124.3 mg, 0.76 mmol) in THF (4 mL), and dimethoxymethylsilane (163.6 mg, d = 0.861 g/mL, 0.19 mL, 1.5 mmol, in 1 mL THF) afforded **3ja** (100.6 mg, 74% yield) as a yellow oil (eluent: Petroleum ether (200 mL) to Petroleum ether/ EtOAc = 100/1 (~ 500 mL)); **<sup>1</sup>H NMR** (400 MHz, CDCl<sub>3</sub>) δ = 7.58-7.50 (m, 2 H, Ar-H), 7.43-7.36 (m, 1 H, Ar-H), 7.36-7.29 (m, 2 H, Ar-H), 7.29-7.18 (m, 4 H, Ar-H), 6.58 (dd, *J*<sub>1</sub> = 17.2 Hz, *J*<sub>2</sub> = 10.8 Hz, 1 H, =CH), 5.31 (d, *J* = 10.8 Hz, 1 H, one proton of =CH<sub>2</sub>), 5.16 (d, *J* = 17.2 Hz, 1 H, one proton of =CH<sub>2</sub>), 1.65 (s, 3 H, CH<sub>3</sub>); **<sup>13</sup>C NMR** (100 MHz, CDCl<sub>3</sub>) δ = 200.3, 143.0, 140.5, 135.8, 132.9, 132.0, 130.0, 129.2, 128.1, 127.8, 117.0, 58.1, 26.0; **IR** (neat): ν = 3087, 3063, 3024, 2987, 2935, 1677, 1596, 1489, 1446, 1402, 1236, 1170, 1095, 1012 cm<sup>-1</sup>; **MS** (70 eV, EI) *m/z* (%): 272 [M<sup>+</sup>(<sup>37</sup>Cl), 0.30], 270 [M<sup>+</sup>(<sup>35</sup>Cl), 1.03], 105 (100); **HRMS** calcd. *m/z* for C<sub>17</sub>H<sub>15</sub><sup>35</sup>ClO (M<sup>+</sup>): 270.0806; Found: 270.0807.

**(11) Preparation of 2-(4-bromophenyl)-2-methyl-1-phenylbut-3-en-1-one (3ka)**  
**(Yy-4-091)**

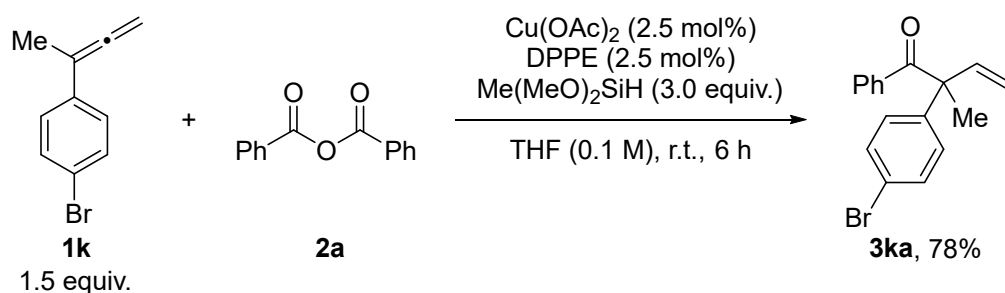

Following **Typical Procedure II**, the reaction of benzoic anhydride **2a** (113.1 mg, 0.50 mmol), Cu(OAc)<sub>2</sub> (2.3 mg, 0.0127 mmol), DPPE (5.0 mg, 0.0125 mmol), allene **1k** (156.6 mg, 0.75 mmol) in THF (4 mL), and dimethoxymethylsilane (163.6 mg, d = 0.861 g/mL, 0.19 mL, 1.5 mmol, in 1 mL THF) afforded **3ka** (122.9 mg, 78% yield) as a colorless oil (eluent: Petroleum ether (200 mL) to Petroleum ether/ EtOAc = 100/1 (~ 400 mL)); **<sup>1</sup>H NMR** (400 MHz, CDCl<sub>3</sub>) δ = 7.56-7.50 (m, 2 H, Ar-H), 7.50-7.43 (m, 2 H, Ar-H), 7.43-7.35 (m, 1 H, Ar-H), 7.30-7.22 (m, 2 H, Ar-H), 7.18-7.10 (m, 2 H, Ar-H), 6.57 (dd, *J*<sub>1</sub> = 17.2 Hz, *J*<sub>2</sub> = 10.8 Hz, 1 H, =CH), 5.31 (d, *J* = 10.8 Hz, 1 H, one proton of =CH<sub>2</sub>), 5.16 (d, *J* = 17.2 Hz, 1 H, one proton of =CH<sub>2</sub>), 1.64 (s, 3 H, CH<sub>3</sub>); **<sup>13</sup>C NMR** (100 MHz, CDCl<sub>3</sub>) δ = 200.2, 143.6, 140.4, 135.8,

132.11, 132.06, 130.0, 128.2, 128.1, 121.0, 117.0, 58.1, 26.0; **IR** (neat):  $\nu = 3087$ , 3060, 2985, 2934, 1677, 1631, 1596, 1487, 1446, 1409, 1396, 1369, 1236, 1170, 1103, 1079, 1008  $\text{cm}^{-1}$ ; **MS** (70 eV, EI)  $m/z$  (%): 316 [ $\text{M}^+(\text{}^{81}\text{Br})$ , 0.39], 314 [ $\text{M}^+(\text{}^{79}\text{Br})$ , 0.45], 130 ( $\text{M}^+\text{-Br-Bz}$ ), 105 (100); **HRMS** calcd.  $m/z$  for  $\text{C}_{17}\text{H}_{15}^{79}\text{BrO}$  ( $\text{M}^+$ ): 314.0301; Found: 314.0302.

### (12) Preparation of 2-phenyl-1-(*m*-tolyl)-2-hexylbuten-1-one (**3ab**) (Yy-4-007)

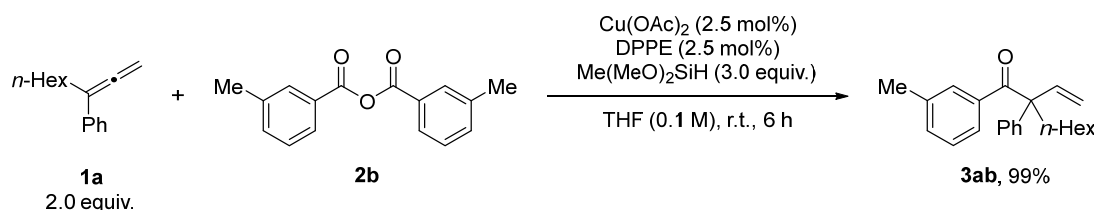

Following **Typical Procedure II**, the reaction of 3-methylbenzoic anhydride **2b** (131.3 mg, 0.5 mmol),  $\text{Cu}(\text{OAc})_2$  (2.3 mg, 0.0127 mmol), DPPE (5.0 mg, 0.0125 mmol), allene **1a** (200.3 mg, 1.0 mmol) in THF (4 mL), and dimethoxymethylsilane (163.6 mg,  $d = 0.861 \text{ g/mL}$ , 0.19 mL, 1.5 mmol, in 1 mL THF) afforded **3ab** (159.1 mg, 99% yield) as a colorless oil (eluent: Petroleum ether (200 mL) to Petroleum ether/ EtOAc = 100/1 (~ 400 mL));  **$^1\text{H NMR}$**  (400 MHz,  $\text{CDCl}_3$ )  $\delta = 7.44$  (s, 1 H, Ar-H), 7.35-7.28 (m, 2 H, Ar-H), 7.28-7.17 (m, 4 H, Ar-H), 7.15 (d,  $J = 7.6 \text{ Hz}$ , 1 H, Ar-H), 7.04 (t,  $J = 7.6 \text{ Hz}$ , 1 H, Ar-H), 6.69 (dd,  $J_1 = 17.6 \text{ Hz}$ ,  $J_2 = 11.2 \text{ Hz}$ , 1 H, =CH), 5.29 (d,  $J = 10.8 \text{ Hz}$ , 1 H, one proton of = $\text{CH}_2$ ), 4.99 (d,  $J = 17.6 \text{ Hz}$ , 1 H, one proton of = $\text{CH}_2$ ), 2.27-2.06 (m, 5 H,  $\text{CH}_2$  and  $\text{CH}_3$ ), 1.24-0.95 (m, 8 H,  $\text{CH}_2 \times 4$ ), 0.81 (t,  $J = 6.8 \text{ Hz}$ , 3 H,  $\text{CH}_3$ );  **$^{13}\text{C NMR}$**  (100 MHz,  $\text{CDCl}_3$ )  $\delta = 200.8$ , 142.7, 139.8, 137.6, 136.4, 132.4, 130.5, 128.7, 127.5, 127.3, 127.2, 126.8, 117.1, 61.6, 38.7, 31.5, 29.8, 24.0, 22.5, 21.3, 14.0; **IR** (neat):  $\nu = 3085$ , 3060, 3028, 2952, 2926, 2856, 1676, 1600, 1583, 1494, 1446, 1252, 1173, 1000  $\text{cm}^{-1}$ ; **MS** (70 eV, EI)  $m/z$  (%): 320 ( $\text{M}^+$ , 1.72), 119 (100); **HRMS** calcd. for  $\text{C}_{23}\text{H}_{28}\text{O}$  ( $\text{M}^+$ ): 320.2135; Found: 320.2139.

### (13) Preparation of 1-(4-fluorophenyl)-2-phenyl-2-hexyl-3-buten-1-one (**3ac**) (Yy-5-049, Yy-4-018)



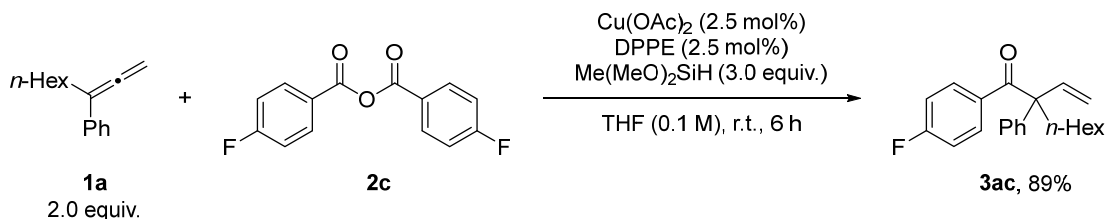

Following **Typical Procedure II**, the reaction of 4-fluorobenzoic anhydride **2c** (135.0 mg, 0.5 mmol),  $\text{Cu(OAc)}_2$  (2.3 mg, 0.0127 mmol), DPPE (5.0 mg, 0.0125 mmol), allene **1a** (200.3 mg, 1.0 mmol) in THF (4 mL), and dimethoxymethylsilane (163.6 mg,  $d = 0.861 \text{ g/mL}$ , 0.19 mL, 1.5 mmol, in 1 mL THF) afforded **3ac** (148.8 mg, 89% yield) as a colorless oil (eluent: Petroleum ether (400 mL) to Petroleum ether/ EtOAc = 100/1 (~ 800 mL));  $^1\text{H NMR}$  (400 MHz,  $\text{CDCl}_3$ )  $\delta = 7.62\text{-}7.52$  (m, 2 H, Ar-H), 7.38-7.28 (m, 2 H, Ar-H), 7.28-7.18 (m, 3 H, Ar-H), 6.92-6.82 (m, 2 H, Ar-H), 6.69 (dd,  $J_1 = 17.6 \text{ Hz}$ ,  $J_2 = 10.8 \text{ Hz}$ , 1 H, =CH), 5.31 (d,  $J = 10.8 \text{ Hz}$ , 1 H, one proton of =CH<sub>2</sub>), 4.99 (d,  $J = 17.6 \text{ Hz}$ , 1 H, one proton of =CH<sub>2</sub>), 2.26-2.08 (m, 2 H, CH<sub>2</sub>), 1.28-0.92 (m, 8 H, CH<sub>2</sub> x 4), 0.81 (t,  $J = 6.8 \text{ Hz}$ , 3 H, CH<sub>3</sub>);  $^{13}\text{C NMR}$  (100 MHz,  $\text{CDCl}_3$ )  $\delta = 199.0$ , 164.6 (d,  $J = 252.0 \text{ Hz}$ ), 142.5, 139.5, 132.7 (d,  $J = 9.5 \text{ Hz}$ ), 132.4 (d,  $J = 3.1 \text{ Hz}$ ), 128.8, 127.1, 126.9, 117.4, 114.9 (d,  $J = 21.3 \text{ Hz}$ ), 61.4, 39.0, 31.5, 29.8, 23.9, 22.5, 14.0;  $^{19}\text{F NMR}$  (376 MHz,  $\text{CDCl}_3$ )  $\delta = -107.4$ ; **IR** (neat):  $\nu = 3084$ , 3061, 3025, 2954, 2928, 2857, 1678, 1597, 1504, 1466, 1447, 1407, 1378, 1297, 1231, 1156, 1098  $\text{cm}^{-1}$ ; **MS** (70 eV, EI)  $m/z$  (%): 324 ( $\text{M}^+$ , 2.08), 123 (100); **HRMS** calcd.  $m/z$  for  $\text{C}_{22}\text{H}_{25}\text{FO}$  ( $\text{M}^+$ ): 324.1884; Found: 324.1888.

**(14) Preparation of 1-(4-chlorophenyl)-2-phenyl-2-hexyl-3-buten-1-one (3ad)**  
**(Yy-5-057, Yy-4-021)**

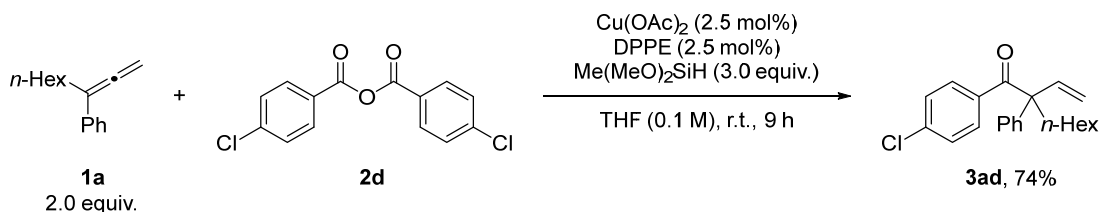

Following **Typical Procedure II**, the reaction of 4-chlorobenzoic anhydride **2d** (147.6 mg, 0.5 mmol),  $\text{Cu(OAc)}_2$  (2.3 mg, 0.0127 mmol), DPPE (5.0 mg, 0.0125 mmol), allene **1a** (200.3 mg, 1.0 mmol) in THF (4 mL), and dimethoxymethylsilane (163.6

mg,  $d = 0.861$  g/mL, 0.19 mL, 1.5 mmol, in 1 mL THF) afforded **3ad** (126.8 mg, 74% yield) as a colorless oil (eluent: Petroleum ether (400 mL) to Petroleum ether/ EtOAc = 100/1 (~ 800 mL));  **$^1\text{H NMR}$**  (400 MHz,  $\text{CDCl}_3$ )  $\delta = 7.48$  (d,  $J = 8.8$  Hz, 2 H, Ar-H), 7.38-7.29 (m, 2 H, Ar-H), 7.28-7.14 (m, 5 H, Ar-H), 6.68 (dd,  $J_1 = 17.6$  Hz,  $J_2 = 10.8$  Hz, 1 H, =CH), 5.31 (d,  $J = 10.8$  Hz, 1 H, one proton of =CH<sub>2</sub>), 4.99 (d,  $J = 17.6$  Hz, 1 H, one proton of =CH<sub>2</sub>), 2.24-2.05 (m, 2 H, CH<sub>2</sub>), 1.26-0.94 (m, 8 H, CH<sub>2</sub> x 4), 0.81 (t,  $J = 6.8$  Hz, 3 H, CH<sub>3</sub>);  **$^{13}\text{C NMR}$**  (100 MHz,  $\text{CDCl}_3$ )  $\delta = 199.3, 142.3, 139.4, 138.0, 134.5, 131.5, 128.9, 128.1, 127.1, 127.0, 117.6, 61.4, 39.0, 31.5, 29.8, 23.9, 22.5, 14.0$ ; **IR** (neat):  $\nu = 3085, 3061, 3025, 2953, 2927, 2857, 1678, 1586, 1569, 1487, 1466, 1447, 1398, 1378, 1225, 1176, 1013$  cm<sup>-1</sup>; **MS** (70 eV, EI)  $m/z$  (%): 342 [ $\text{M}^+(\text{}^{37}\text{Cl})$ , 0.77], 340 [ $\text{M}^+(\text{}^{35}\text{Cl})$ , 1.96], 139 (100); **HRMS** calcd.  $m/z$  for  $\text{C}_{22}\text{H}_{25}^{35}\text{ClO}$  ( $\text{M}^+$ ): 340.1588; Found: 340.1589.

**(15) Preparation of 1-(4-(*tert*-butyl)phenyl)-2-phenyl-2-hexyl-3-buten-1-one (3ae)**  
**(Yy-4-024)**

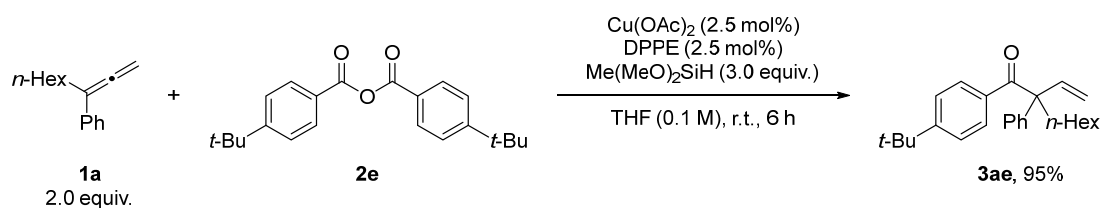

Following **Typical Procedure II**, the reaction of 4-(*tert*-butyl)benzoic anhydride **2e** (169.5 mg, 0.5 mmol),  $\text{Cu}(\text{OAc})_2$  (2.3 mg, 0.0127 mmol), DPPE (5.0 mg, 0.0125 mmol), allene **1a** (200.3 mg, 1.0 mmol) in THF (4 mL), and dimethoxymethylsilane (163.6 mg,  $d = 0.861$  g/mL, 0.19 mL, 1.5 mmol, in 1 mL THF) afforded **3ae** (173.0 mg, 95% yield) as a colorless oil (eluent: Petroleum ether (200 mL) to Petroleum ether/ EtOAc = 100/1 (~ 600 mL));  **$^1\text{H NMR}$**  (400 MHz,  $\text{CDCl}_3$ )  $\delta = 7.47$  (d,  $J = 8.8$  Hz, 2 H, Ar-H), 7.37-7.29 (m, 2 H, Ar-H), 7.29-7.18 (m, 5 H, Ar-H), 6.69 (dd,  $J_1 = 17.6$  Hz,  $J_2 = 10.8$  Hz, 1 H, =CH), 5.29 (d,  $J = 10.8$  Hz, 1 H, one proton of =CH<sub>2</sub>), 4.99 (d,  $J = 17.6$  Hz, 1 H, one proton of =CH<sub>2</sub>), 2.28-2.07 (m, 2 H, CH<sub>2</sub>), 1.24 (s, 9 H, CH<sub>3</sub> x 3), 1.20-0.94 (m, 8 H, CH<sub>2</sub> x 4), 0.80 (t,  $J = 6.8$  Hz, 3 H, CH<sub>3</sub>);  **$^{13}\text{C NMR}$**  (100 MHz,  $\text{CDCl}_3$ )  $\delta = 200.1, 155.2, 142.9, 139.9, 133.6, 130.0, 128.7, 127.2, 126.7, 124.8, 117.0, 61.5, 38.6, 34.9, 31.5, 31.0, 29.8, 23.9, 22.5, 14.0$ ; **IR** (neat):  $\nu = 3085, 3059,$

3025, 2955, 2928, 2860, 1675, 1604, 1563, 1495, 1464, 1447, 1406, 1364, 1268, 1235, 1193, 1110  $\text{cm}^{-1}$ ; **MS** (70 eV, EI)  $m/z$  (%): 362 ( $\text{M}^+$ , 1.13), 161 (100); **HRMS** calcd.  $m/z$  for  $\text{C}_{26}\text{H}_{34}\text{O}$  ( $\text{M}^+$ ): 362.2604; Found: 362.2607.

**(16) Preparation of 1-(4-methoxyphenyl)-2-phenyl-2-hexyl-3-buten-1-one (3ag) (Yy-4-041)**

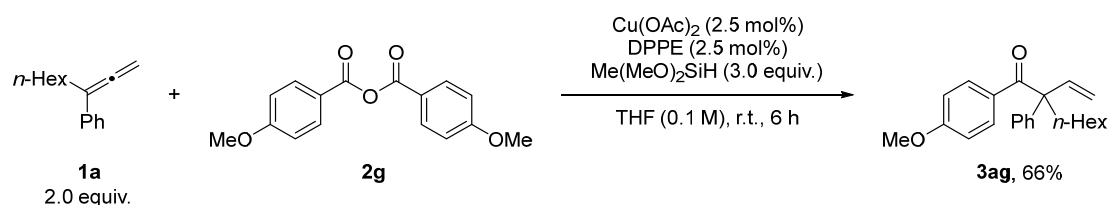

Following **Typical Procedure II**, the reaction of 4-methoxybenzoic anhydride **2g** (143.3 mg, 0.5 mmol),  $\text{Cu}(\text{OAc})_2$  (2.3 mg, 0.0127 mmol), DPPE (5.0 mg, 0.0125 mmol), allene **1a** (200.3 mg, 1.0 mmol) in THF (4 mL), and dimethoxymethylsilane (163.6 mg,  $d = 0.861 \text{ g/mL}$ , 0.19 mL, 1.5 mmol, in 1 mL THF) afforded **3ag** (110.5 mg, 66% yield) as a colorless oil (eluent: Petroleum ether (400 mL) to Petroleum ether/ EtOAc = 50/1 (~ 400 mL));  **$^1\text{H NMR}$**  (400 MHz,  $\text{CDCl}_3$ )  $\delta = 7.56$  (d,  $J = 9.2$  Hz, 2 H, Ar-H), 7.35-7.28 (m, 2 H, Ar-H), 7.28-7.19 (m, 3 H, Ar-H), 6.76-6.66 (m, 3 H, =CH and Ar-H), 5.28 (d,  $J = 10.8$  Hz, 1 H, one proton of = $\text{CH}_2$ ), 4.98 (d,  $J = 17.6$  Hz, 1 H, one proton of = $\text{CH}_2$ ), 3.75 (s, 3 H,  $\text{CH}_3$ ), 2.25-2.05 (m, 2 H,  $\text{CH}_2$ ), 1.22-0.94 (m, 8 H,  $\text{CH}_2 \times 4$ ), 0.81 (t,  $J = 6.8$  Hz, 3 H,  $\text{CH}_3$ );  **$^{13}\text{C NMR}$**  (100 MHz,  $\text{CDCl}_3$ )  $\delta = 199.0, 162.2, 143.2, 140.0, 132.5, 128.8, 128.7, 127.1, 126.7, 116.9, 113.0, 61.2, 55.2, 39.0, 31.5, 29.8, 24.0, 22.5, 14.0$ ; **IR** (neat):  $\nu = 3083, 3059, 3024, 2953, 2928, 2856, 1669, 1598, 1575, 1508, 1495, 1458, 1446, 1417, 1307, 1259, 1238, 1169, 1115, 1030 \text{ cm}^{-1}$ ; **MS** (70 eV, EI)  $m/z$  (%): 336 ( $\text{M}^+$ , 1.17), 135 (100); **HRMS** calcd.  $m/z$  for  $\text{C}_{23}\text{H}_{28}\text{O}_2$  ( $\text{M}^+$ ): 336.2084; Found: 336.2085.

**(17) Preparation of 3-phenyl-3-hexyl-3-buten-2-one (3ah) (Yy-4-039)**

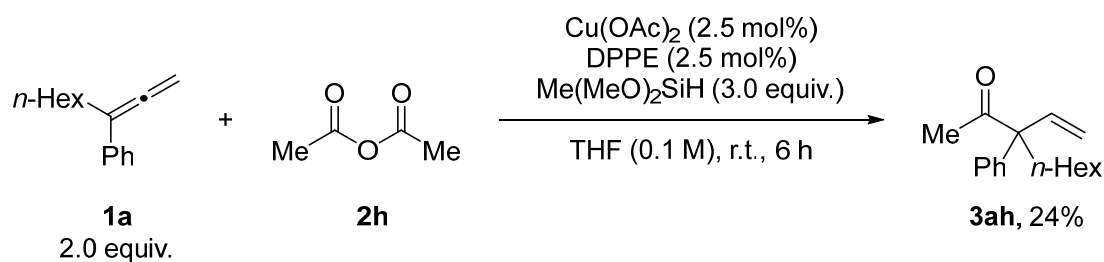

Following **Typical Procedure II**, the reaction of acetic anhydride **2h** (51.0 mg, 0.5 mmol), Cu(OAc)<sub>2</sub> (2.3 mg, 0.0127 mmol), DPPE (5.0 mg, 0.0125 mmol), allene **1a** (200.3 mg, 1.0 mmol) in THF (4 mL), and dimethoxymethylsilane (163.6 mg, d = 0.861 g/mL, 0.19 mL, 1.5 mmol, in 1 mL THF) afforded **3ah** (32.1 mg, 90% purity, 24% yield) as a yellow oil (eluent: Petroleum ether (300 mL) to Petroleum ether/EtOAc = 100/1 (~ 600 mL)); <sup>1</sup>H NMR (400 MHz, CDCl<sub>3</sub>) δ = 7.39-7.30 (m, 2 H, Ar-H), 7.30-7.23 (m, 1 H, Ar-H), 7.23-7.14 (m, 2 H, Ar-H), 6.47 (dd, *J*<sub>1</sub> = 17.8 Hz, *J*<sub>2</sub> = 11.0 Hz, 1 H, =CH), 5.35 (d, *J* = 10.8 Hz, 1 H, one proton of =CH<sub>2</sub>), 4.99 (d, *J* = 17.6 Hz, 1 H, one proton of =CH<sub>2</sub>), 2.13-1.95 (m, 2 H, CH<sub>2</sub>), 1.94 (s, 3 H, CH<sub>3</sub>), 1.28-0.94 (m, 8 H, CH<sub>2</sub> x 4), 0.84 (t, *J* = 6.6 Hz, 3 H, CH<sub>3</sub>); <sup>13</sup>C NMR (100 MHz, CDCl<sub>3</sub>) δ = 208.2, 141.5, 138.9, 128.6, 127.5, 126.9, 117.2, 63.3, 35.9, 31.6, 29.9, 26.9, 24.2, 22.6, 14.0; IR (neat): ν = 3085, 3059, 3024, 2927, 2857, 1709, 1632, 1599, 1494, 1447, 1352, 1174, 1119, 1004 cm<sup>-1</sup>; MS (70 eV, EI) *m/z* (%): 244 (M<sup>+</sup>, 1.45), 117 (100); HRMS calcd. *m/z* for C<sub>17</sub>H<sub>24</sub>O (M<sup>+</sup>): 244.1822; Found: 244.1819.

#### 4. Preparation of optically active products

##### (1) Preparation of (*R*)-1,2-diphenyl-2-hexyl-3-buten-1-one [(*R*)-**3aa**] (Yy-3-132)

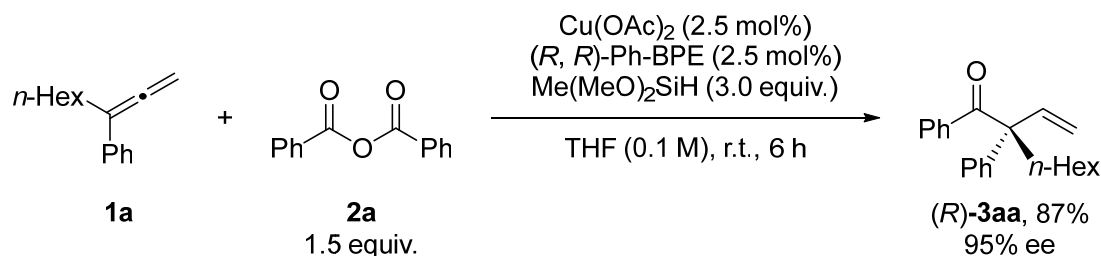

**Typical Procedure III:** To an oven-dried 25 mL Schlenk tube were added a stirring bar, benzoic anhydride **2a** (339.3 mg, 1.5 mmol), Cu(OAc)<sub>2</sub> (4.5 mg, 0.025 mmol), (*R,R*)-Ph-BPE (12.7 mg, 0.025 mmol), and allene **1a** (200.3 mg, 1.0 mmol) in THF (8 mL) under nitrogen. The resulting mixture was stirred at room temperature for 5 min followed by the addition of dimethoxymethylsilane solution (318.6 mg, d = 0.861 g/mL, 0.37 mL, 3.0 mmol, diluted with 2 mL THF). After being stirred at room temperature for 6 h, a saturated solution of NH<sub>4</sub>F in methanol (5 mL) was added to quench the reaction. The reaction mixture was stirred for 15 min at room temperature and then filtered through a short plug of celite eluted with EtOAc (10 mL x 3). The

solvent was removed *in vacuo* and the crude product was purified by column chromatography on silica gel to afford (*R*)-**3aa** (266.7 mg, 87% yield) as a colorless oil (eluent: Petroleum ether (250 mL) to petroleum ether/ EtOAc = 100/1 (~ 500 mL)): 95% ee (HPLC conditions: AD-H column, hexane/*i*-PrOH = 95/5, 1.0 mL/min,  $\lambda = 214$  nm,  $t_R$  (major) = 4.0 min,  $t_R$  (minor) = 3.8 min;  $[\alpha]_D^{22} = +98.5$  ( $c = 1.04$ , CHCl<sub>3</sub>); <sup>1</sup>H NMR (400 MHz, CDCl<sub>3</sub>)  $\delta = 7.53$  (d,  $J = 8.0$  Hz, 2 H, Ar-H), 7.40-7.28 (m, 3 H, Ar-H), 7.28-7.15 (m, 5 H, Ar-H), 6.70 (dd,  $J_1 = 17.6$  Hz,  $J_2 = 10.8$  Hz, 1 H, =CH), 5.30 (d,  $J = 11.2$  Hz, 1 H, one proton of =CH<sub>2</sub>), 4.99 (d,  $J = 17.6$  Hz, 1 H, one proton of =CH<sub>2</sub>), 2.30-2.05 (m, 2 H, CH<sub>2</sub>), 1.30-0.95 (m, 8 H, CH<sub>2</sub> x 4), 0.81 (t,  $J = 6.6$  Hz, 3 H, CH<sub>3</sub>); <sup>13</sup>C NMR (100 MHz, CDCl<sub>3</sub>)  $\delta = 200.6, 142.6, 139.7, 136.3, 131.7, 130.0, 128.7, 127.8, 127.1, 126.8, 117.2, 61.5, 38.7, 31.5, 29.8, 23.9, 22.5, 14.0$ ; IR (neat):  $\nu = 3088, 3062, 3026, 2953, 2927, 2857, 1676, 1597, 1579, 1466, 1446, 1227, 1180$  cm<sup>-1</sup>; MS (70 eV, EI)  $m/z$  (%): 306 (M<sup>+</sup>, 2.39), 105 (100); HRMS calcd.  $m/z$  for C<sub>22</sub>H<sub>26</sub>O (M<sup>+</sup>): 306.1978; Found: 306.1978.

## (2) Preparation of (*R*)-1,2-Diphenyl-2butyl-3-buten-1-one [(*R*)-**3ba**] (Yy-3-160)

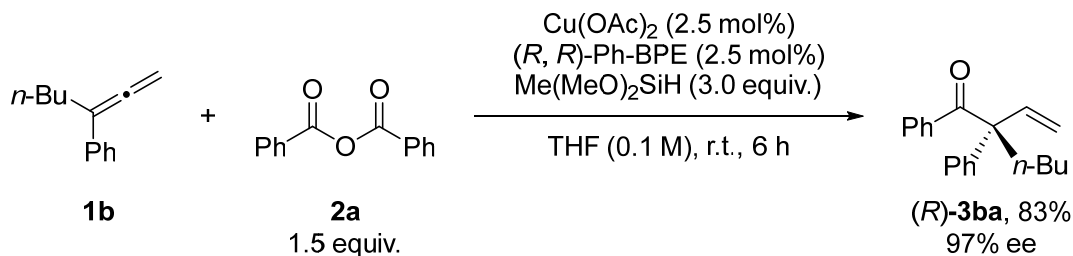

Following **Typical Procedure III**, the reaction of benzoic anhydride **2a** (339.3 mg, 1.5 mmol), Cu(OAc)<sub>2</sub> (4.5 mg, 0.025 mmol), (*R,R*)-Ph-BPE (12.7 mg, 0.025 mmol), allene **1b** (172.3 mg, 1.0 mmol) in THF (8 mL), and dimethoxymethylsilane (318.6 mg, d = 0.861 g/mL, 0.37 mL, 3.0 mmol, in 2 mL THF) afforded (*R*)-**3ba** (236.1 mg, 98% purity, 83% yield) as a colorless oil (eluent: Petroleum ether (250 mL) to Petroleum ether/ EtOAc = 100/1 (~ 500 mL)): 97% ee (HPLC conditions: AD-H column, hexane/*i*-PrOH = 95/5, 1.0 mL/min,  $\lambda = 214$  nm,  $t_R$  (major) = 4.3 min,  $t_R$  (minor) = 4.0 min;  $[\alpha]_D^{26} = +110.7$  ( $c = 1.07$ , CHCl<sub>3</sub>); <sup>1</sup>H NMR (400 MHz, CDCl<sub>3</sub>)  $\delta = 7.53$  (d,  $J = 7.6$  Hz, 2 H, Ar-H), 7.36-7.29 (m, 3 H, Ar-H), 7.29-7.15 (m, 5 H, Ar-H), 6.70 (dd,  $J_1 = 17.6$  Hz,  $J_2 = 11.2$  Hz, 1 H, =CH), 5.30 (d,  $J = 10.8$  Hz, 1 H, one

proton of =CH<sub>2</sub>), 5.00 (d, *J* = 17.6 Hz, 1 H, one proton of =CH<sub>2</sub>), 2.28-2.08 (m, 2 H, CH<sub>2</sub>), 1.30-1.15 (m, 2 H, CH<sub>2</sub>), 1.15-0.90 (m, 2 H, CH<sub>2</sub>), 0.78 (t, *J* = 7.2 Hz, 3 H, CH<sub>3</sub>); <sup>13</sup>C NMR (100 MHz, CDCl<sub>3</sub>) δ = 200.6, 142.6, 139.7, 136.3, 131.7, 130.0, 128.7, 127.8, 127.1, 126.8, 117.2, 61.4, 38.5, 26.2, 23.2, 13.8; IR (neat): ν = 3086, 3058, 3024, 2955, 2931, 2871, 1675, 1597, 1578, 1495, 1446, 1225, 1181 cm<sup>-1</sup>; MS (70 eV, EI) *m/z* (%): 278 (M<sup>+</sup>, 1.88), 105 (100); HRMS calcd. *m/z* for C<sub>20</sub>H<sub>22</sub>O (M<sup>+</sup>): 278.1665; Found: 278.1668.

### (3) Preparation of (*R*)-2-ethyl-1,2-diphenylbut-3-en-1-one [(*R*)-3ca] (Yy-3-183)

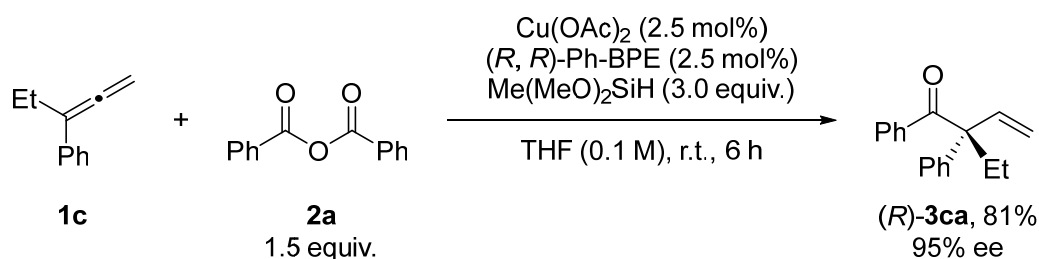

Following **Typical Procedure III**, the reaction of benzoic anhydride **2a** (339.3 mg, 1.5 mmol), Cu(OAc)<sub>2</sub> (4.5 mg, 0.025 mmol), (*R,R*)-Ph-BPE (12.7 mg, 0.025 mmol), allene **1c** (144.4 mg, 1.0 mmol) in THF (8 mL), and dimethoxymethylsilane (318.6 mg, d = 0.861 g/mL, 0.37 mL, 3.0 mmol, in 2 mL THF) afforded (*R*)-**3ca** (203.9 mg, 99% purity, 81% yield) as a colorless oil (eluent: Petroleum ether (200 mL) to Petroleum ether/ EtOAc = 100/1 (~ 800 mL)): 95% ee (HPLC conditions: OD-H column, hexane/*i*-PrOH = 99.5/0.5, 1.0 mL/min, λ = 214 nm, *t<sub>R</sub>* (major) = 6.0 min, *t<sub>R</sub>* (minor) = 5.7 min; [α]<sub>D</sub><sup>23</sup> = +137.6 (c = 1.12, CHCl<sub>3</sub>); <sup>1</sup>H NMR (400 MHz, CDCl<sub>3</sub>) δ = 7.58-7.50 (m, 2 H, Ar-H), 7.37-7.29 (m, 3 H, Ar-H), 7.29-7.15 (m, 5 H, Ar-H), 6.69 (dd, *J*<sub>1</sub> = 17.6 Hz, *J*<sub>2</sub> = 10.8 Hz, 1 H, =CH), 5.32 (d, *J* = 11.2 Hz, 1 H, one proton of =CH<sub>2</sub>), 5.02 (d, *J* = 17.6 Hz, 1 H, one proton of =CH<sub>2</sub>), 2.35-2.10 (m, 2 H, CH<sub>2</sub>), 0.71 (t, *J* = 7.4 Hz, 3 H, CH<sub>3</sub>); <sup>13</sup>C NMR (100 MHz, CDCl<sub>3</sub>) δ = 200.5, 142.4, 139.1, 136.3, 131.7, 130.0, 128.7, 127.8, 127.2, 126.8, 117.5, 61.8, 31.5, 8.6; IR (neat): ν = 3085, 3058, 3025, 2970, 2937, 2879, 1674, 1597, 1578, 1494, 1446, 1227, 1181, 1003 cm<sup>-1</sup>; MS (70 eV, EI) *m/z* (%): 250 (M<sup>+</sup>, 1.18), 105 (100); HRMS calcd. *m/z* for C<sub>18</sub>H<sub>18</sub>O (M<sup>+</sup>): 250.1352; Found: 250.1352.

#### (4) Preparation of (*R*)-2-methyl-1,2-diphenylbut-3-en-1-one [(*R*)-3da] (Yy-4-066)

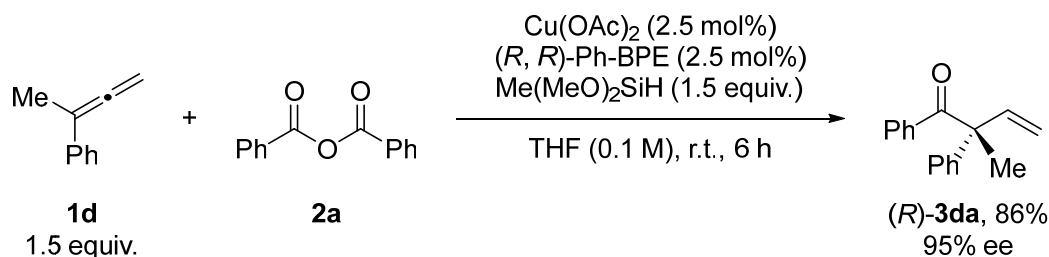

Following **Typical Procedure III**, the reaction of benzoic anhydride **2a** (226.4 mg, 1.0 mmol), Cu(OAc)<sub>2</sub> (4.5 mg, 0.025 mmol), (*R,R*)-Ph-BPE (12.7 mg, 0.025 mmol), allene **1d** (195.5 mg, 1.5 mmol) in THF (8 mL), and dimethoxymethylsilane (163.6 mg, d = 0.861 g/mL, 0.19 mL, 1.5 mmol, in 2 mL THF) afforded (*R*)-**3da**<sup>8</sup> (204.2 mg, 86% yield) as a colorless oil (eluent: Petroleum ether (200 mL) to Petroleum ether/EtOAc = 100/1 (~ 400 mL) to 50/1 (~ 400 mL)): 95% ee (HPLC conditions: AD-H column, hexane/*i*-PrOH = 99/1, 1.0 mL/min, λ = 214 nm, t<sub>R</sub> (major) = 6.3 min, t<sub>R</sub> (minor) = 6.9 min; [α]<sub>D</sub><sup>23</sup> = +141.7 (c = 1.00, CHCl<sub>3</sub>) [reported: 90% ee, [α]<sub>D</sub><sup>20</sup> = +129.9 (c = 1.00, CHCl<sub>3</sub>)]<sup>8</sup>; <sup>1</sup>H NMR (400 MHz, CDCl<sub>3</sub>) δ = 7.53 (d, *J* = 7.6 Hz, 2 H, Ar-H), 7.40-7.30 (m, 3 H, Ar-H), 7.30-7.18 (m, 5 H, Ar-H), 6.62 (dd, *J*<sub>1</sub> = 17.4 Hz, *J*<sub>2</sub> = 10.6 Hz, 1 H, =CH), 5.29 (d, *J* = 10.8 Hz, 1 H, one proton of =CH<sub>2</sub>), 5.16 (d, *J* = 17.2 Hz, 1 H, one proton of =CH<sub>2</sub>), 1.67 (s, 3 H, CH<sub>3</sub>); <sup>13</sup>C NMR (100 MHz, CDCl<sub>3</sub>) δ = 200.8, 144.4, 141.0, 136.2, 131.8, 130.0, 129.0, 127.9, 126.9, 126.4, 116.6, 58.5, 25.9; IR (neat): ν = 3085, 3058, 3024, 2979, 2930, 1674, 1595, 1579, 1493, 1446, 1407, 1364, 1236, 1165, 1078, 1007 cm<sup>-1</sup>; MS (70 eV, EI) *m/z* (%): 236 (M<sup>+</sup>, 2.10), 105 (100).

#### (5) Preparation of (*R*)-2-benzyl-1,2-diphenylbut-3-en-1-one [(*R*)-3ea] (Yy-4-048)

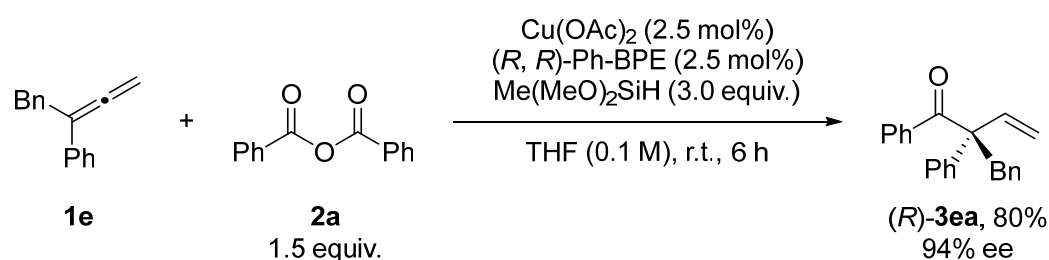

Following **Typical Procedure III**, the reaction of benzoic anhydride **2a** (339.9 mg, 1.5 mmol), Cu(OAc)<sub>2</sub> (4.5 mg, 0.025 mmol), (*R,R*)-Ph-BPE (12.7 mg, 0.025 mmol),

allene **1e** (206.6 mg, 1.0 mmol) in THF (8 mL), and dimethoxymethylsilane (318.6 mg, d = 0.861 g/mL, 0.37 mL, 3.0 mmol, in 2 mL THF) afforded (*R*)-**3ea** (249.0 mg, 80% yield) as a white solid: m.p. 111.7-112.9 °C (Petroleum ether/ EtOAc) (eluent: Petroleum ether (200 mL) to Petroleum ether/ EtOAc = 100/1 (~ 400 mL)): 94% ee (HPLC conditions: OD-H column, hexane/*i*-PrOH = 99/1, 1.0 mL/min,  $\lambda$  = 214 nm,  $t_R$  (major) = 6.4 min,  $t_R$  (minor) = 5.7 min;  $[\alpha]_D^{24}$  = +190.4 (c = 0.99, CHCl<sub>3</sub>); <sup>1</sup>H NMR (400 MHz, CDCl<sub>3</sub>)  $\delta$  = 7.61 (d,  $J$  = 7.6 Hz, 2 H, Ar-H), 7.32 (t,  $J$  = 7.2 Hz, 1 H, Ar-H), 7.25-7.15 (m, 5 H, Ar-H), 7.15-6.90 (m, 5 H, Ar-H), 6.70-6.55 (m, 3 H, =CH and Ar-H), 5.40 (d,  $J$  = 10.8 Hz, 1 H, one proton of =CH<sub>2</sub>), 5.14 (d,  $J$  = 17.6 Hz, 1 H, one proton of =CH<sub>2</sub>), 3.48 (q,  $J$  = 13.5 Hz, 2 H, CH<sub>2</sub>); <sup>13</sup>C NMR (100 MHz, CDCl<sub>3</sub>)  $\delta$  = 199.9, 141.6, 139.3, 136.9, 135.7, 131.8, 131.2, 130.6, 128.5, 127.8, 127.5, 127.2, 126.9, 126.1, 118.5, 62.2, 47.3; IR (neat):  $\nu$  = 3084, 3059, 3027, 2963, 2925, 1677, 1596, 1577, 1490, 1454, 1445, 1397, 1227, 1180, 1156, 1077 cm<sup>-1</sup>; MS (70 eV, EI)  $m/z$  (%): 313 (M<sup>+1</sup>, 4.75), 312 (M<sup>+</sup>, 18.00), 105 (100); HRMS calcd.  $m/z$  for C<sub>23</sub>H<sub>20</sub>O (M<sup>+</sup>): 312.1509; Found: 312.1509.

**(6) Preparation of (*R*)-2-(Naphthalen-2-yl)-1-phenyl-2-hexylbut-3-en-1-one [(*R*)-**3fa**] (Yy-3-134)**

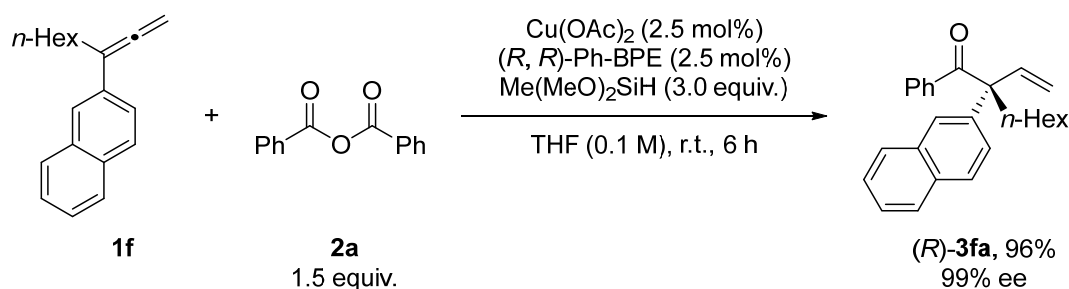

Following **Typical Procedure III**, the reaction of benzoic anhydride **2a** (339.3 mg, 1.5 mmol), Cu(OAc)<sub>2</sub> (4.5 mg, 0.025 mmol), (*R,R*)-Ph-BPE (12.7 mg, 0.025 mmol), allene **1f** (250.4 mg, 1.0 mmol) in THF (8 mL), and dimethoxymethylsilane (318.6 mg, d = 0.861 g/mL, 0.37 mL, 3.0 mmol, in 2 mL THF) afforded (*R*)-**3fa** (341.6 mg, 96% yield) as a colorless oil (eluent: Petroleum ether (500 mL) to Petroleum ether/ EtOAc = 100/1 (~ 400 mL)): 99% ee (HPLC conditions: AD-H column, hexane/*i*-PrOH = 99/1, 1.0 mL/min,  $\lambda$  = 214 nm,  $t_R$  (major) = 9.4 min,  $t_R$  (minor) = 8.6 min;  $[\alpha]_D^{21}$  = +97.8 (c = 1.55, CHCl<sub>3</sub>); <sup>1</sup>H NMR (400 MHz, CDCl<sub>3</sub>)  $\delta$  = 7.90-7.70 (m,



4 H, Ar-H), 7.56 (d,  $J = 7.6$  Hz, 2 H, Ar-H), 7.50-7.40 (m, 2 H, Ar-H), 7.35-7.20 (m, 2 H, Ar-H), 7.15 (t,  $J = 7.6$  Hz, 2 H, Ar-H), 6.82 (dd,  $J_1 = 17.6$  Hz,  $J_2 = 10.8$  Hz, 1 H, =CH), 5.35 (d,  $J = 10.8$  Hz, 1 H, one proton of =CH<sub>2</sub>), 5.03 (d,  $J = 17.6$  Hz, 1 H, one proton of =CH<sub>2</sub>), 2.40-2.18 (m, 2 H, CH<sub>2</sub>), 1.24-0.95 (m, 8 H, CH<sub>2</sub> x 4), 0.78 (t,  $J = 6.2$  Hz, 3 H, CH<sub>3</sub>); <sup>13</sup>C NMR (100 MHz, CDCl<sub>3</sub>)  $\delta = 200.6, 140.2, 139.7, 136.4, 133.5, 132.3, 131.7, 130.0, 128.5, 128.1, 127.9, 127.6, 126.2, 125.9, 125.7, 125.5, 117.4, 61.6, 38.7, 31.5, 29.8, 24.0, 22.5, 14.0$ ; IR (neat):  $\nu = 3060, 3033, 2956, 2920, 2856, 1718, 1668, 1630, 1597, 1579, 1504, 1478, 1447, 1269, 1235, 1179, 1108$  cm<sup>-1</sup>; MS (70 eV, EI)  $m/z$  (%): 357 (M<sup>+</sup>+1, 2.64), 356 (M<sup>+</sup>, 9.57), 105 (100); HRMS calcd. for C<sub>26</sub>H<sub>29</sub>O (M+H<sup>+</sup>): 357.2213; Found: 357.2212.

**(7) Preparation of (*R*)-2-(benzo[*d*][1,3]dioxol-5-yl)-1-phenyl-2-propylbut-3-en-1-one [(*R*)-3ga] (Yy-4-060)**

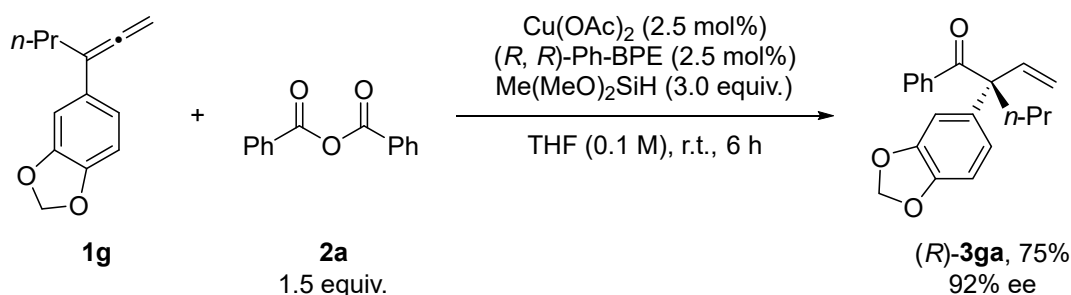

Following **Typical Procedure III**, the reaction of benzoic anhydride **2a** (339.3 mg, 1.5 mmol), Cu(OAc)<sub>2</sub> (4.5 mg, 0.025 mmol), (*R,R*)-Ph-BPE (12.7 mg, 0.025 mmol), allene **1g** (202.0 mg, 1.0 mmol) in THF (8 mL), and dimethoxymethylsilane (318.6 mg, d = 0.861 g/mL, 0.37 mL, 3.0 mmol, in 2 mL THF) afforded (*R*)-**3ga** (230.0 mg, 75% yield) as a colorless oil (eluent: Petroleum ether (100 mL) to Petroleum ether/EtOAc = 50/1 (~ 400 mL)): 92% ee (HPLC conditions: AD-H column, hexane/*i*-PrOH = 98/2, 1.0 mL/min,  $\lambda = 214$  nm,  $t_R$  (major) = 8.3 min,  $t_R$  (minor) = 10.1 min;  $[\alpha]_D^{23} = +107.9$  (c = 0.84, CHCl<sub>3</sub>); <sup>1</sup>H NMR (400 MHz, CDCl<sub>3</sub>)  $\delta = 7.58$  (d,  $J = 7.6$  Hz, 2 H, Ar-H), 7.36 (t,  $J = 7.4$  Hz, 1 H, Ar-H), 7.23 (t,  $J = 7.8$  Hz, 2 H, Ar-H), 6.80-6.66 (m, 3 H, Ar-H), 6.62 (dd,  $J_1 = 17.6$  Hz,  $J_2 = 10.8$  Hz, 1 H, =CH), 5.94 (d,  $J = 2.0$  Hz, 2 H, CH<sub>2</sub>), 5.28 (d,  $J = 10.8$  Hz, 1 H, one proton of =CH<sub>2</sub>), 4.99 (d,  $J = 17.6$  Hz, 1 H, one proton of =CH<sub>2</sub>), 2.20-2.00 (m, 2 H, CH<sub>2</sub>), 1.18-0.98 (m, 2 H, CH<sub>2</sub>), 0.83

(t,  $J = 7.2$  Hz, 3 H, CH<sub>3</sub>); <sup>13</sup>C NMR (100 MHz, CDCl<sub>3</sub>)  $\delta = 200.3, 148.1, 146.4, 139.7, 136.44, 136.37, 131.7, 130.0, 127.9, 120.4, 117.1, 108.4, 107.7, 101.1, 61.2, 41.0, 17.4, 14.6$ ; IR (neat):  $\nu = 2969, 2953, 2935, 2898, 2873, 1672, 1596, 1503, 1484, 1447, 1433, 1232, 1185, 1111, 1039$  cm<sup>-1</sup>; MS (70 eV, EI)  $m/z$  (%): 309 (M<sup>+</sup>+1, 5.37), 308 (M<sup>+</sup>, 21.71), 203 (100); HRMS calcd.  $m/z$  for C<sub>20</sub>H<sub>20</sub>O<sub>3</sub> (M<sup>+</sup>): 308.1407; Found: 308.1410.

**(8) Preparation of (*R*)-2-methyl-1-phenyl-2-(*p*-tolyl)but-3-en-1-one [(*R*)-3ha] (Yy-4-080)**

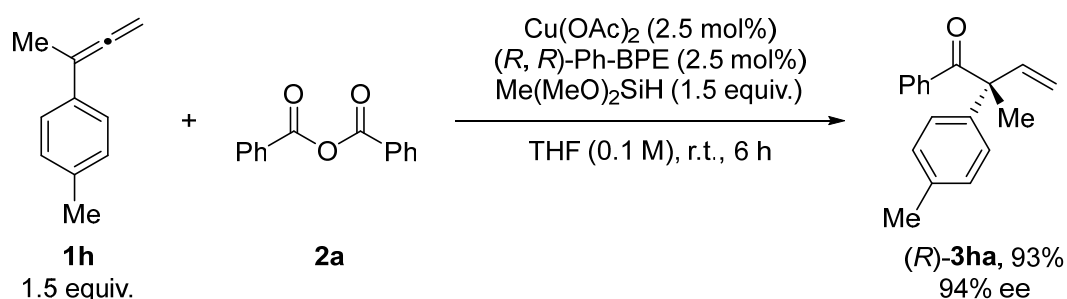

Following **Typical Procedure III**, the reaction of benzoic anhydride **2a** (226.0 mg, 1.0 mmol), Cu(OAc)<sub>2</sub> (4.5 mg, 0.025 mmol), (*R,R*)-Ph-BPE (12.7 mg, 0.025 mmol), allene **1h** (216.3 mg, 1.5 mmol) in THF (8 mL), and dimethoxymethylsilane (163.6 mg,  $d = 0.861$  g/mL, 0.19 mL, 1.5 mmol, in 2 mL THF) afforded (*R*)-3ha<sup>8</sup> (233.7 mg, 93% yield) as a yellow oil (eluent: Petroleum ether (200 mL) to Petroleum ether/EtOAc = 100/1 (~ 600 mL)): 94% ee (HPLC conditions: AD-H column, hexane/*i*-PrOH = 99/1, 1.0 mL/min,  $\lambda = 214$  nm,  $t_R$  (major) = 6.0 min,  $t_R$  (minor) = 7.1 min;  $[\alpha]_D^{23} = +124.6$  ( $c = 1.11$ , CHCl<sub>3</sub>) [reported: 89% ee,  $[\alpha]_D^{20} = +108.7$  ( $c = 1.00$ , CHCl<sub>3</sub>)]<sup>8</sup>; <sup>1</sup>H NMR (400 MHz, CDCl<sub>3</sub>)  $\delta = 7.59-7.51$  (m, 2 H, Ar-H), 7.40-7.32 (m, 1 H, Ar-H), 7.27-7.19 (m, 2 H, Ar-H), 7.19-7.10 (m, 4 H, Ar-H), 6.60 (dd,  $J_1 = 17.4$  Hz,  $J_2 = 10.6$  Hz, 1 H, =CH), 5.27 (d,  $J = 10.8$  Hz, 1 H, one proton of =CH<sub>2</sub>), 5.14 (d,  $J = 17.6$  Hz, 1 H, one proton of =CH<sub>2</sub>), 2.33 (s, 3 H, CH<sub>3</sub>), 1.65 (s, 3 H, CH<sub>3</sub>); <sup>13</sup>C NMR (100 MHz, CDCl<sub>3</sub>)  $\delta = 201.1, 141.3, 141.2, 136.6, 136.3, 131.8, 130.0, 129.7, 127.9, 126.3, 116.3, 58.2, 25.9, 21.0$ ; IR (neat):  $\nu = 3062, 3025, 2984, 2937, 1676, 1511, 1446, 1408, 1366, 1239, 1168, 1112, 1078, 1010$  cm<sup>-1</sup>; MS (70 eV, EI)  $m/z$  (%): 250 (M<sup>+</sup>, 6.24), 105 (100).

**(9) Preparation of (*R*)-2-(3-methoxyphenyl)-2-methyl-1-phenylbut-3-en-1-one [(*R*)-3ia] (Yy-4-082)**

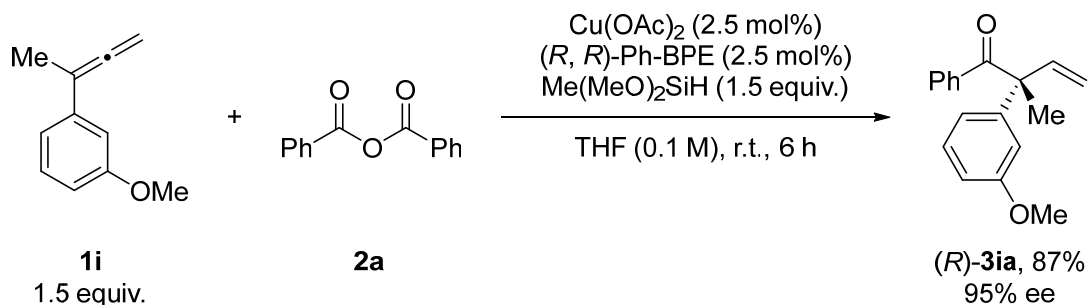

Following **Typical Procedure III**, the reaction of benzoic anhydride **2a** (226.1 mg, 1.0 mmol),  $\text{Cu}(\text{OAc})_2$  (4.5 mg, 0.025 mmol), (*R,R*)-Ph-BPE (12.7 mg, 0.025 mmol), allene **1i** (240.3 mg, 1.5 mmol) in THF (8 mL), and dimethoxymethylsilane (163.6 mg,  $d = 0.861 \text{ g/mL}$ , 0.19 mL, 1.5 mmol, in 2 mL THF) afforded (*R*)-**3ia** (231.1 mg, 87% yield) as a colorless oil (eluent: Petroleum ether (200 mL) to Petroleum ether/ EtOAc = 100/1 (~ 200 mL) to 50/1 (~ 400 mL)): 95% ee (HPLC conditions: AD-H column, hexane/*i*-PrOH = 98/2, 1.0 mL/min,  $\lambda = 214 \text{ nm}$ ,  $t_R$  (major) = 6.7 min,  $t_R$  (minor) = 7.4 min;  $[\alpha]_D^{24} = +125.2$  ( $c = 1.08$ ,  $\text{CHCl}_3$ ); **<sup>1</sup>H NMR** (400 MHz,  $\text{CDCl}_3$ )  $\delta = 7.60\text{-}7.52$  (m, 2 H, Ar-H), 7.40-7.33 (m, 1 H, Ar-H), 7.26-7.19 (m, 3 H, Ar-H), 6.88-6.77 (m, 3 H, Ar-H), 6.60 (dd,  $J_1 = 17.2 \text{ Hz}$ ,  $J_2 = 10.8 \text{ Hz}$ , 1 H, =CH), 5.28 (d,  $J = 10.4 \text{ Hz}$ , 1 H, one proton of =CH<sub>2</sub>), 5.16 (d,  $J = 17.2 \text{ Hz}$ , 1 H, one proton of =CH<sub>2</sub>), 3.75 (s, 3 H, OCH<sub>3</sub>), 1.66 (s, 3 H, CH<sub>3</sub>); **<sup>13</sup>C NMR** (100 MHz,  $\text{CDCl}_3$ )  $\delta = 200.6$ , 160.0, 146.0, 140.8, 136.2, 131.8, 129.94, 129.91, 127.9, 118.9, 116.5, 112.4, 111.9, 58.4, 55.1, 25.7; **IR** (neat):  $\nu = 3061$ , 2986, 2936, 2835, 1677, 1596, 1580, 1485, 1447, 1432, 1409, 1290, 1239, 1129, 1045, 1013  $\text{cm}^{-1}$ ; **MS** (70 eV, EI)  $m/z$  (%): 266 ( $\text{M}^+$ , 7.09), 105 (100); **HRMS** calcd.  $m/z$  for  $\text{C}_{18}\text{H}_{18}\text{O}_2$  ( $\text{M}^+$ ): 266.1301; Found: 266.1305.

**(10) Preparation of (*R*)-2-(4-chlorophenyl)-2-methyl-1-phenylbut-3-en-1-one [(*R*)-3ja] (Yy-4-088)**

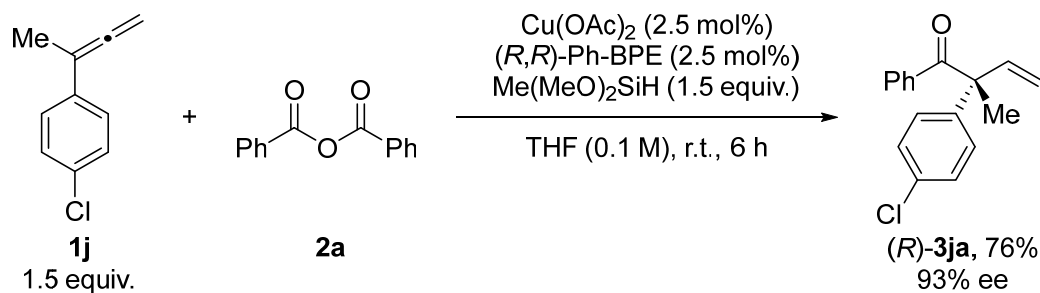

Following **Typical Procedure III**, the reaction of benzoic anhydride **2a** (226.2 mg, 1.0 mmol),  $\text{Cu}(\text{OAc})_2$  (4.5 mg, 0.025 mmol),  $(R,R)$ -Ph-BPE (12.7 mg, 0.025 mmol), allene **1j** (247.5 mg, 1.5 mmol) in THF (8 mL), and dimethoxymethylsilane (163.6 mg,  $d = 0.861 \text{ g/mL}$ , 0.19 mL, 1.5 mmol, in 2 mL THF) afforded **(R)-3ja**<sup>8</sup> (204.7 mg, 76% yield) as a colorless oil (eluent: Petroleum ether (200 mL) to Petroleum ether/EtOAc = 100/1 (~ 505 mL)): 93% ee (HPLC conditions: AD-H column, hexane/*i*-PrOH = 99/1, 1.0 mL/min,  $\lambda = 214 \text{ nm}$ ,  $t_R$  (major) = 5.9 min,  $t_R$  (minor) = 6.4 min;  $[\alpha]_D^{24} = +117.0$  ( $c = 1.12$ ,  $\text{CHCl}_3$ ) [reported: 94% ee,  $[\alpha]_D^{20} = +110.9$  ( $c = 1.00$ ,  $\text{CHCl}_3$ )]<sup>8</sup>; **<sup>1</sup>H NMR** (400 MHz,  $\text{CDCl}_3$ )  $\delta = 7.58\text{--}7.50$  (m, 2 H, Ar-H), 7.44–7.36 (m, 1 H, Ar-H), 7.36–7.29 (m, 2 H, Ar-H), 7.29–7.18 (m, 4 H, Ar-H), 6.58 (dd,  $J_1 = 17.2 \text{ Hz}$ ,  $J_2 = 10.8 \text{ Hz}$ , 1 H, =CH), 5.31 (d,  $J = 10.8 \text{ Hz}$ , 1 H, one proton of =CH<sub>2</sub>), 5.16 (d,  $J = 17.2 \text{ Hz}$ , 1 H, one proton of =CH<sub>2</sub>), 1.65 (s, 3 H, CH<sub>3</sub>); **<sup>13</sup>C NMR** (100 MHz,  $\text{CDCl}_3$ )  $\delta = 200.3, 143.0, 140.5, 135.8, 132.9, 132.0, 130.0, 129.2, 128.1, 127.8, 117.0, 58.1, 26.0$ ; **IR** (neat):  $\nu = 3067, 2987, 2937, 1723, 1675, 1629, 1598, 1581, 1490, 1457, 1446, 1407, 1367, 1240, 1168, 1127, 1094, 1007 \text{ cm}^{-1}$ ; **MS** (70 eV, EI)  $m/z$  (%): 272 [ $\text{M}^+(\text{^{37}Cl})$ , 0.31], 270 [ $\text{M}^+(\text{^{35}Cl})$ , 1.03], 105 (100).

**(11) Preparation of (R)-2-(4-bromophenyl)-2-methyl-1-phenylbut-3-en-1-one [(R)-3ka] (Yy-4-090)**

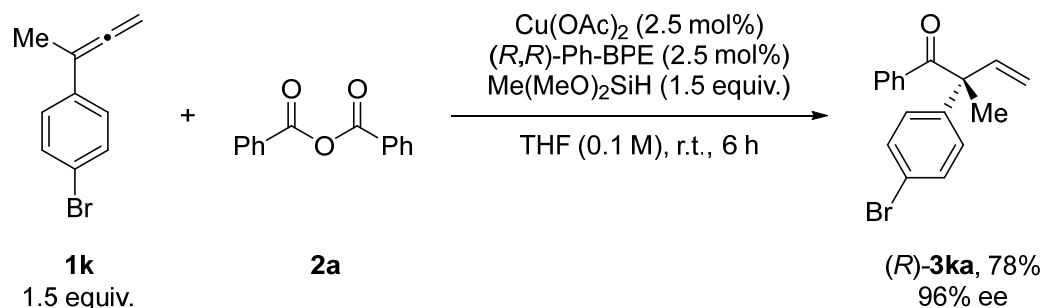

Following **Typical Procedure III**, the reaction of benzoic anhydride **2a** (226.2 mg,

1.0 mmol), Cu(OAc)<sub>2</sub> (4.5 mg, 0.025 mmol), (*R,R*)-Ph-BPE (12.7 mg, 0.025 mmol), allene **1k** (313.5 mg, 1.5 mmol) in THF (8 mL), and dimethoxymethylsilane (163.6 mg, d = 0.861 g/mL, 0.19 mL, 1.5 mmol, in 2 mL THF) afforded (*R*)-**3ka** (245.7 mg, 78% yield) as a colorless oil (eluent: Petroleum ether (200 mL) to Petroleum ether/EtOAc = 100/1 (~ 600 mL)): 96% ee (HPLC conditions: AD-H column, hexane/*i*-PrOH = 99/1, 1.0 mL/min, λ = 214 nm, t<sub>R</sub> (major) = 7.7 min, t<sub>R</sub> (minor) = 9.3 min; [α]<sub>D</sub><sup>23</sup> = +100.8 (c = 1.14, CHCl<sub>3</sub>); <sup>1</sup>H NMR (400 MHz, CDCl<sub>3</sub>) δ = 7.56-7.50 (m, 2 H, Ar-H), 7.47 (d, *J* = 8.4 Hz, 2 H, Ar-H), 7.40 (t, *J* = 7.4 Hz, 1 H, Ar-H), 7.26 (d, *J* = 7.8 Hz, 2 H, Ar-H), 7.15 (d, *J* = 8.4 Hz, 2 H, Ar-H), 6.57 (dd, *J*<sub>1</sub> = 17.2 Hz, *J*<sub>2</sub> = 10.8 Hz, 1 H, =CH), 5.31 (d, *J* = 10.8 Hz, 1 H, one proton of =CH<sub>2</sub>), 5.16 (d, *J* = 17.2 Hz, 1 H, one proton of =CH<sub>2</sub>), 1.64 (s, 3 H, CH<sub>3</sub>); <sup>13</sup>C NMR (100 MHz, CDCl<sub>3</sub>) δ = 200.2, 143.6, 140.4, 135.8, 132.12, 132.07, 130.0, 128.2, 128.1, 121.0, 117.1, 58.1, 26.0; IR (neat): ν = 3063, 2985, 2937, 1675, 1629, 1597, 1581, 1489, 1446, 1408, 1398, 1365, 1241, 1170, 1105, 1081, 1007 cm<sup>-1</sup>; MS (70 eV, EI) *m/z* (%): 316 [M<sup>+</sup>(<sup>81</sup>Br), 0.57], 314 [M<sup>+</sup>(<sup>79</sup>Br), 0.59], 130 (M<sup>+</sup>-Br-Bz), 105 (100); HRMS calcd. *m/z* for C<sub>17</sub>H<sub>15</sub><sup>79</sup>BrO (M<sup>+</sup>): 314.0301; Found: 314.0303.

**(12) Preparation of (*R*)-2-phenyl-1-(*m*-tolyl)-2-hexylbut-en-1-one [(*R*)-**3ab**] (Yy-4-006)**

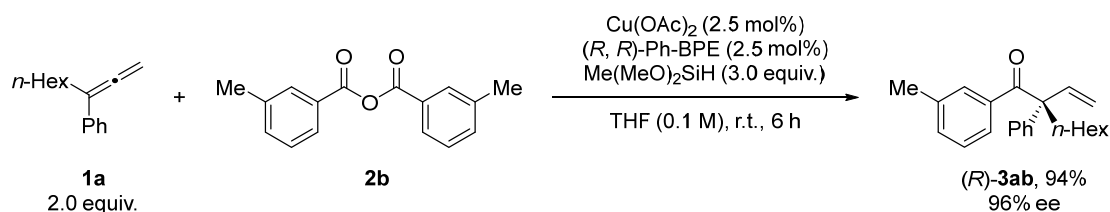

Following **Typical Procedure III**, the reaction of 3-methylbenzoic anhydride **2b** (262.1 mg, 1.0 mmol), Cu(OAc)<sub>2</sub> (4.5 mg, 0.025 mmol), (*R,R*)-Ph-BPE (12.7 mg, 0.025 mmol), allene **1a** (400.9 mg, 2.0 mmol) in THF (8 mL), and dimethoxymethylsilane (318.6 mg, d = 0.861 g/mL, 0.37 mL, 3.0 mmol, in 2 mL THF) afforded (*R*)-**3ab** (302.1 mg, 94% yield) as a colorless oil (eluent: Petroleum ether (200 mL) to Petroleum ether/EtOAc = 100/1 (~ 400 mL)): 96% ee (HPLC conditions: AD-H column, hexane/*i*-PrOH = 99/1, 1.0 mL/min, λ = 214 nm, t<sub>R</sub> (major)

= 5.5 min,  $t_R$  (minor) = 4.8 min;  $[\alpha]_D^{31} = +94.5$  ( $c = 1.18$ ,  $\text{CHCl}_3$ );  $^1\text{H NMR}$  (400 MHz,  $\text{CDCl}_3$ )  $\delta = 7.44$  (s, 1 H, Ar-H), 7.35-7.28 (m, 2 H, Ar-H), 7.28-7.17 (m, 4 H, Ar-H), 7.14 (d,  $J = 7.6$  Hz, 1 H, Ar-H), 7.04 (t,  $J = 7.8$  Hz, 1 H, Ar-H), 6.69 (dd,  $J_1 = 17.6$  Hz,  $J_2 = 10.8$  Hz, 1 H, =CH), 5.29 (d,  $J = 10.8$  Hz, 1 H, one proton of =CH<sub>2</sub>), 5.00 (d,  $J = 17.6$  Hz, 1 H, one proton of =CH<sub>2</sub>), 2.27-2.06 (m, 5 H, CH<sub>2</sub> and CH<sub>3</sub>), 1.24-0.95 (m, 8 H, CH<sub>2</sub> x 4), 0.81 (t,  $J = 6.8$  Hz, 3 H, CH<sub>3</sub>);  $^{13}\text{C NMR}$  (100 MHz,  $\text{CDCl}_3$ )  $\delta = 200.8$ , 142.7, 139.8, 137.6, 136.4, 132.4, 130.5, 128.7, 127.5, 127.3, 127.2, 126.7, 117.1, 61.5, 38.7, 31.5, 29.8, 23.9, 22.5, 21.3, 14.0; **IR** (neat):  $\nu = 3084$ , 3060, 3026, 2953, 2926, 2857, 1676, 1600, 1583, 1494, 1446, 1252, 1173, 1001  $\text{cm}^{-1}$ ; **MS** (70 eV, EI)  $m/z$  (%): 320 ( $\text{M}^+$ , 1.54), 119 (100); **HRMS** calcd. for  $\text{C}_{23}\text{H}_{28}\text{O}$  ( $\text{M}^+$ ): 320.2135; Found: 320.2140.

**(13) Preparation of (*R*)-1-(4-fluorophenyl)-2-phenyl-2-hexylbut-3-en-1-one [(*R*)-3ac] (Yy-5-050, Yy-4-017)**

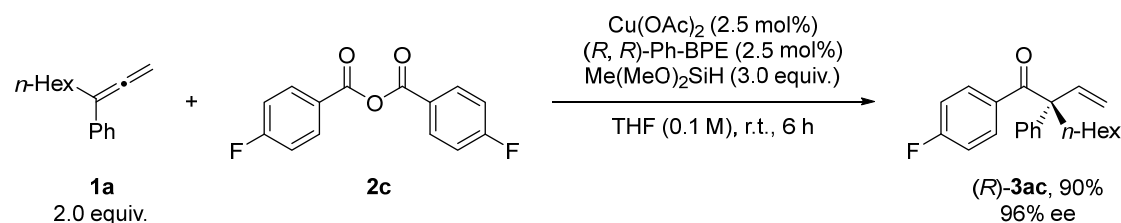

Following **Typical Procedure III**, the reaction of 4-fluorobenzoyl anhydride **2c** (270.5 mg, 1.0 mmol),  $\text{Cu}(\text{OAc})_2$  (4.5 mg, 0.025 mmol),  $(R,R)$ -Ph-BPE (12.7 mg, 0.025 mmol), allene **1a** (400.2 mg, 2.0 mmol) in THF (8 mL), and dimethoxymethylsilane (318.6 mg,  $d = 0.861$  g/mL, 0.37 mL, 3.0 mmol, in 2 mL THF) afforded **(*R*)-3ac** (302.5 mg, 90% yield) as a colorless oil (eluent: Petroleum ether (500 mL) to Petroleum ether/ EtOAc = 100/1 (~ 1000 mL)): 96% ee (HPLC conditions: AD-H column, hexane/*i*-PrOH = 99/1, 1.0 mL/min,  $\lambda = 214$  nm,  $t_R$  (major) = 5.9 min,  $t_R$  (minor) = 5.3 min;  $[\alpha]_D^{31} = +93.3$  ( $c = 1.03$ ,  $\text{CHCl}_3$ );  $^1\text{H NMR}$  (400 MHz,  $\text{CDCl}_3$ )  $\delta = 7.64$ -7.52 (m, 2 H, Ar-H), 7.38-7.28 (m, 2 H, Ar-H), 7.28-7.18 (m, 3 H, Ar-H), 6.92-6.82 (m, 2 H, Ar-H), 6.69 (dd,  $J_1 = 17.6$  Hz,  $J_2 = 10.8$  Hz, 1 H, =CH), 5.31 (d,  $J = 11.2$  Hz, 1 H, one proton of =CH<sub>2</sub>), 4.99 (d,  $J = 17.6$  Hz, 1 H, one proton of =CH<sub>2</sub>), 2.26-2.05 (m, 2 H, CH<sub>2</sub>), 1.24-0.94 (m, 8 H, CH<sub>2</sub> x 4), 0.81 (t,  $J = 6.8$  Hz, 3

H, CH<sub>3</sub>); <sup>13</sup>C NMR (100 MHz, CDCl<sub>3</sub>) δ = 199.0, 164.6 (d, *J* = 252.0 Hz), 142.5, 139.5, 132.7 (d, *J* = 8.7 Hz), 132.4 (d, *J* = 3.1 Hz), 128.8, 127.1, 126.9, 117.4, 114.9 (d, *J* = 21.3 Hz), 61.4, 39.0, 31.5, 29.8, 23.9, 22.5, 14.0; <sup>19</sup>F NMR (376 MHz, CDCl<sub>3</sub>) δ = -107.4; IR (neat): ν = 3084, 3025, 2954, 2928, 2857, 1678, 1597, 1504, 1466, 1447, 1407, 1231, 1156 cm<sup>-1</sup>; MS (70 eV, EI) *m/z* (%): 324 (M<sup>+</sup>, 2.07), 123 (100); HRMS calcd. *m/z* for C<sub>22</sub>H<sub>25</sub>FO (M<sup>+</sup>): 324.1884; Found: 324.1888.

**(14) Preparation of (*R*)-1-(4-chlorophenyl)-2-phenyl-2-vinyloctan-1-one [(*R*)-3ad]**  
**(Yy-5-053, Yy-4-020)**

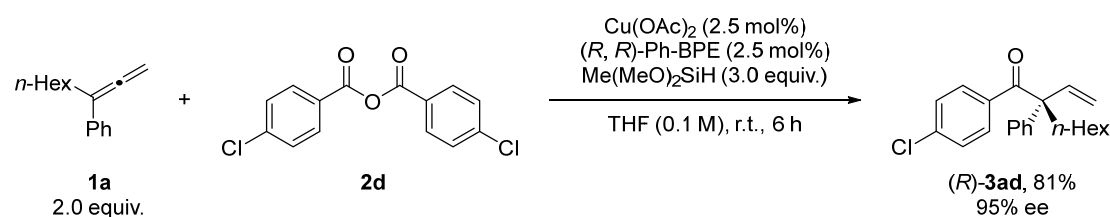

Following **Typical Procedure III**, the reaction of 4-chlorobenzoyl anhydride **2d** (295.1 mg, 1.0 mmol), Cu(OAc)<sub>2</sub> (4.5 mg, 0.025 mmol), (*R,R*)-Ph-BPE (12.7 mg, 0.025 mmol), allene **1a** (400.6 mg, 2.0 mmol) in THF (8 mL), and dimethoxymethylsilane (318.6 mg, d = 0.861 g/mL, 0.37 mL, 3.0 mmol, in 2 mL THF) afforded (*R*)-3ad (276.2 mg, 81% yield) as a colorless oil (eluent: Petroleum ether (400 mL) to Petroleum ether/ EtOAc = 100/1 (~ 800 mL)): 95% ee (HPLC conditions: AD-H column, hexane/*i*-PrOH = 99/1, 1.0 mL/min, λ = 214 nm, *t<sub>R</sub>* (major) = 6.3 min, *t<sub>R</sub>* (minor) = 6.0 min; [α]<sup>30</sup><sub>D</sub> = +96.7 (c = 1.19, CHCl<sub>3</sub>); <sup>1</sup>H NMR (400 MHz, CDCl<sub>3</sub>) δ = 7.48 (d, *J* = 8.8 Hz, 2 H, Ar-H), 7.38-7.29 (m, 2 H, Ar-H), 7.28-7.14 (m, 5 H, Ar-H), 6.68 (dd, *J*<sub>1</sub> = 17.6 Hz, *J*<sub>2</sub> = 11.2 Hz, 1 H, =CH), 5.31 (d, *J* = 10.8 Hz, 1 H, one proton of =CH<sub>2</sub>), 4.99 (d, *J* = 17.6 Hz, 1 H, one proton of =CH<sub>2</sub>), 2.25-2.05 (m, 2 H, CH<sub>2</sub>), 1.25-0.92 (m, 8 H, CH<sub>2</sub> x 4), 0.81 (t, *J* = 6.8 Hz, 3 H, CH<sub>3</sub>); <sup>13</sup>C NMR (100 MHz, CDCl<sub>3</sub>) δ = 199.3, 142.3, 139.4, 138.0, 134.5, 131.5, 128.9, 128.1, 127.1, 127.0, 117.6, 61.4, 39.0, 31.5, 29.8, 23.9, 22.5, 14.0; IR (neat): ν = 3085, 3061, 3025, 2953, 2927, 2857, 1678, 1586, 1487, 1447, 1398, 1224, 1176, 1093, 1013 cm<sup>-1</sup>; MS (70 eV, EI) *m/z* (%): 342 [M<sup>+</sup>(<sup>37</sup>Cl), 0.63], 340 [M<sup>+</sup>(<sup>35</sup>Cl), 1.66], 139 (100); HRMS calcd. *m/z* for C<sub>22</sub>H<sub>25</sub><sup>35</sup>ClO (M<sup>+</sup>): 340.1588; Found: 340.1590.

**(15) Preparation of (*R*)-1-(4-(*tert*-butyl)phenyl)-2-phenyl-2-hexylbut-3-en-1-one [(*R*)-3ae] (Yy-5-054, Yy-4-023)**

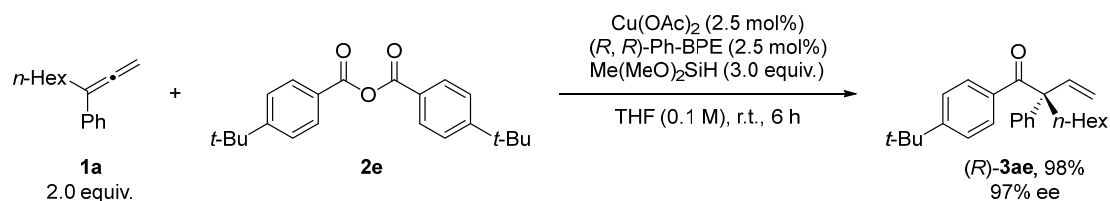

Following **Typical Procedure III**, the reaction of 4-(*tert*-butyl)benzoic anhydride **2e** (338.5 mg, 1.0 mmol),  $\text{Cu}(\text{OAc})_2$  (4.5 mg, 0.025 mmol), (*R,R*)-Ph-BPE (12.7 mg, 0.025 mmol), allene **1a** (400.6 mg, 2.0 mmol) in THF (8 mL), and dimethoxymethylsilane (318.6 mg,  $d = 0.861$  g/mL, 0.37 mL, 3.0 mmol, in 2 mL THF) afforded (*R*)-**3ae** (353.9 mg, 98% yield) as a colorless oil (eluent: Petroleum ether (200 mL) to Petroleum ether/ EtOAc = 100/1 (~ 800 mL)): 97% ee (HPLC conditions: AD-H column, hexane/*i*-PrOH = 97/3, 1.0 mL/min,  $\lambda = 214$  nm,  $t_R$  (major) = 4.9 min,  $t_R$  (minor) = 4.4 min;  $[\alpha]_D^{30} = +95.5$  ( $c = 1.09$ ,  $\text{CHCl}_3$ );  **$^1\text{H NMR}$**  (400 MHz,  $\text{CDCl}_3$ )  $\delta = 7.47$  (d,  $J = 8.8$  Hz, 2 H, Ar-H), 7.37-7.28 (m, 2 H, Ar-H), 7.28-7.18 (m, 5 H, Ar-H), 6.70 (dd,  $J_1 = 17.6$  Hz,  $J_2 = 11.2$  Hz, 1 H, =CH), 5.28 (d,  $J = 10.8$  Hz, 1 H, one proton of =CH<sub>2</sub>), 4.99 (d,  $J = 17.6$  Hz, 1 H, one proton of =CH<sub>2</sub>), 2.28-2.08 (m, 2 H, CH<sub>2</sub>), 1.24 (s, 9 H, CH<sub>3</sub> x 3), 1.20-0.95 (m, 8 H, CH<sub>2</sub> x 4), 0.80 (t,  $J = 6.8$  Hz, 3 H, CH<sub>3</sub>);  **$^{13}\text{C NMR}$**  (100 MHz,  $\text{CDCl}_3$ )  $\delta = 200.1, 155.2, 142.9, 139.9, 133.6, 130.0, 128.7, 127.2, 126.7, 124.8, 117.0, 61.4, 38.5, 34.8, 31.5, 31.0, 29.8, 23.9, 22.5, 14.0$ ; **IR** (neat):  $\nu = 3086, 3059, 3025, 2955, 2928, 2860, 1674, 1604, 1495, 1464, 1447, 1407, 1364, 1268, 1236, 1193, 1110$  cm<sup>-1</sup>; **MS** (70 eV, EI)  $m/z$  (%): 362 ( $\text{M}^+$ , 1.37), 161 (100); **HRMS** calcd.  $m/z$  for  $\text{C}_{26}\text{H}_{34}\text{O}$  ( $\text{M}^+$ ): 362.2604; Found: 362.2607.

**(16) Preparation of (*R*)-1-(4-(dimethylamino)phenyl)-2-phenyl-2-hexylbut-3-en-1-one [(*R*)-3af] (Yy-4-027)**

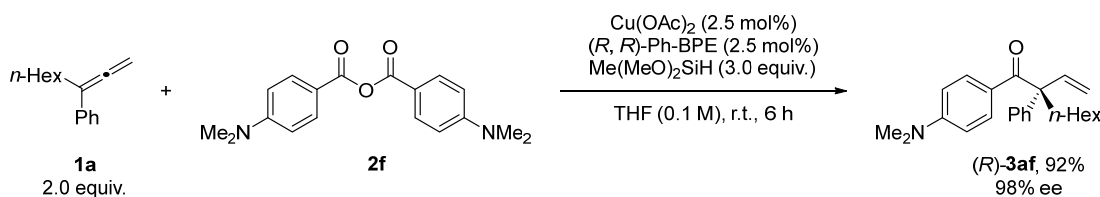

Following **Typical Procedure III**, the reaction of 4-(dimethylamino)benzoic



anhydride **2f** (312.4 mg, 1.0 mmol), Cu(OAc)<sub>2</sub> (4.5 mg, 0.025 mmol), (*R,R*)-Ph-BPE (12.7 mg, 0.025 mmol), allene **1a** (400.6 mg, 2.0 mmol) in THF (8 mL), and dimethoxymethylsilane (318.6 mg, d = 0.861 g/mL, 0.37 mL, 3.0 mmol, in 2 mL THF) afforded (*R*)-**3af** (321.7 mg, 92% yield) as a white solid: m.p. 87.7-88.5 °C (Petroleum ether/ CH<sub>2</sub>Cl<sub>2</sub>) (eluent: Petroleum ether (300 mL) to Petroleum ether/ EtOAc = 20/1 (~ 420 mL)): 98% ee (HPLC conditions: AD-H column, hexane/*i*-PrOH = 90/10, 1.0 mL/min, λ = 214 nm, t<sub>R</sub> (major) = 8.5 min, t<sub>R</sub> (minor) = 6.9 min; [α]<sub>D</sub><sup>24</sup> = +143.3 (c = 1.12, CHCl<sub>3</sub>); <sup>1</sup>H NMR (400 MHz, CDCl<sub>3</sub>) δ = 7.52 (d, *J* = 9.2 Hz, 2 H, Ar-H), 7.35-7.27 (m, 2 H, Ar-H), 7.25-7.18 (m, 3 H, Ar-H), 6.73 (dd, *J*<sub>1</sub> = 17.4 Hz, *J*<sub>2</sub> = 11.0 Hz, 1 H, =CH), 6.42 (d, *J* = 9.2 Hz, 2 H, Ar-H), 5.25 (d, *J* = 10.8 Hz, 1 H, one proton of =CH<sub>2</sub>), 4.97 (d, *J* = 17.6 Hz, 1 H, one proton of =CH<sub>2</sub>), 2.95 (s, 6 H, NMe<sub>2</sub>), 2.25-2.05 (m, 2 H, CH<sub>2</sub>), 1.24-0.96 (m, 8 H, CH<sub>2</sub> x 4), 0.81 (t, *J* = 6.8 Hz, 3 H, CH<sub>3</sub>); <sup>13</sup>C NMR (100 MHz, CDCl<sub>3</sub>) δ = 198.4, 152.2, 144.0, 140.6, 132.4, 128.4, 127.1, 126.3, 123.4, 116.2, 110.0, 60.9, 39.7, 39.0, 31.5, 29.9, 24.0, 22.5, 14.0; IR (neat): ν = 2945, 2924, 2849, 1655, 1600, 1546, 1529, 1494, 1467, 1446, 1376, 1258, 1186, 1067, 1005 cm<sup>-1</sup>; MS (70 eV, EI) *m/z* (%): 349 (M<sup>+</sup>, 1.79), 148 (100); Anal. calcd. for C<sub>24</sub>H<sub>31</sub>NO: C 82.47, H 8.94; Found: C 82.37, H 8.86.

### (17) Preparation of (*S*)-1-(4-(dimethylamino)phenyl)-2-phenyl-2-hexylbut-3-en-1-one [(*S*)-**3af**] (Yy-4-036)

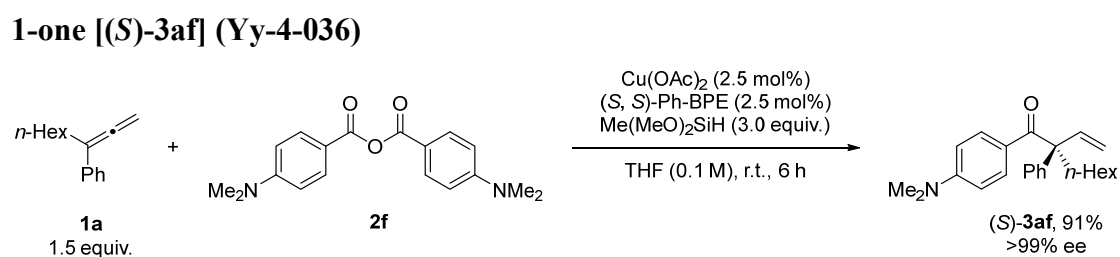

Following **Typical Procedure III**, the reaction of 4-(dimethylamino)benzoic anhydride **2f** (156.3 mg, 0.5 mmol), Cu(OAc)<sub>2</sub> (2.3 mg, 0.0125 mmol), (*S,S*)-Ph-BPE (6.3 mg, 0.0125 mmol), allene **1a** (150.2 mg, 0.75 mmol) in THF (4 mL), and dimethoxymethylsilane (163.6 mg, d = 0.861 g/mL, 0.19 mL, 1.5 mmol, in 1 mL THF) afforded (*S*)-**3af** (158.5 mg, 91% yield) as a white solid: m.p. 88.0-88.7 °C (Petroleum ether/ CH<sub>2</sub>Cl<sub>2</sub>) (eluent: Petroleum ether (300 mL) to Petroleum ether/ EtOAc = 20/1 (~ 420 mL)): >99% ee (HPLC conditions: AD-H column, hexane/*i*-PrOH = 90/10, 1.0

mL/min,  $\lambda = 214$  nm,  $t_R$  (major) = 6.9 min;  $[\alpha]^{24}_D = -141.4$  ( $c = 1.14$ ,  $\text{CHCl}_3$ );  $^1\text{H NMR}$  (400 MHz,  $\text{CDCl}_3$ )  $\delta = 7.56$ - $7.49$  (m, 2 H, Ar-H),  $7.35$ - $7.27$  (m, 2 H, Ar-H),  $7.25$ - $7.18$  (m, 3 H, Ar-H),  $6.73$  (dd,  $J_1 = 17.6$  Hz,  $J_2 = 10.8$  Hz, 1 H, =CH),  $6.46$ - $6.39$  (m, 2 H, Ar-H),  $5.25$  (d,  $J = 11.2$  Hz, 1 H, one proton of =CH<sub>2</sub>),  $4.97$  (d,  $J = 17.6$  Hz, 1 H, one proton of =CH<sub>2</sub>),  $2.95$  (s, 6 H, NMe<sub>2</sub>),  $2.26$ - $2.06$  (m, 2 H, CH<sub>2</sub>),  $1.30$ - $0.95$  (m, 8 H, CH<sub>2</sub> x 4),  $0.81$  (t,  $J = 7.0$  Hz, 3 H, CH<sub>3</sub>);  $^{13}\text{C NMR}$  (100 MHz,  $\text{CDCl}_3$ )  $\delta = 198.4$ ,  $152.2$ ,  $144.0$ ,  $140.6$ ,  $132.4$ ,  $128.4$ ,  $127.1$ ,  $126.3$ ,  $123.4$ ,  $116.2$ ,  $110.0$ ,  $60.9$ ,  $39.7$ ,  $39.0$ ,  $31.5$ ,  $29.9$ ,  $24.0$ ,  $22.5$ ,  $14.0$ ; **IR** (neat):  $\nu = 2944$ ,  $2925$ ,  $2856$ ,  $1655$ ,  $1597$ ,  $1546$ ,  $1528$ ,  $1494$ ,  $1467$ ,  $1446$ ,  $1375$ ,  $1256$ ,  $1172$ ,  $1067$ ,  $1005$   $\text{cm}^{-1}$ ; **MS** (70 eV, EI)  $m/z$  (%):  $349$  ( $\text{M}^+$ , 1.21),  $148$  (100); **Anal.** calcd. for  $\text{C}_{24}\text{H}_{31}\text{NO}$ : C 82.47, H 8.94; Found: C 82.17, H 9.25.

**(18) Preparation of (R)-1-(4-methoxyphenyl)-2-phenyl-2-hexylbut-3-en-1-one [(R)-3ag] (Yy-4-040)**

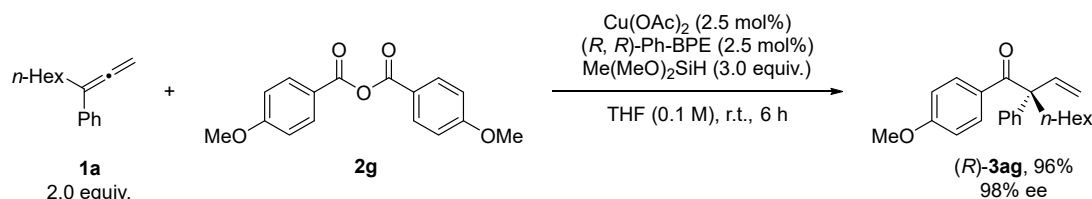

Following **Typical Procedure III**, the reaction of 4-methoxybenzoic anhydride **2g** (286.3 mg, 1.0 mmol),  $\text{Cu}(\text{OAc})_2$  (4.5 mg, 0.025 mmol), (*R,R*)-Ph-BPE (12.7 mg, 0.025 mmol), allene **1a** (400.6 mg, 2.0 mmol) in THF (8 mL), and dimethoxymethylsilane (318.6 mg,  $d = 0.861$  g/mL, 0.37 mL, 3.0 mmol, in 2 mL THF) afforded (*R*)-**3ag** (321.5 mg, 96% yield) as a colorless oil (eluent: Petroleum ether (400 mL) to Petroleum ether/ EtOAc = 50/1 (~ 400 mL)): 98% ee (HPLC conditions: AD-H column, hexane/*i*-PrOH = 98/2, 1.0 mL/min,  $\lambda = 214$  nm,  $t_R$  (major) = 9.1 min,  $t_R$  (minor) = 7.8 min;  $[\alpha]^{24}_D = +108.5$  ( $c = 0.99$ ,  $\text{CHCl}_3$ );  $^1\text{H NMR}$  (400 MHz,  $\text{CDCl}_3$ )  $\delta = 7.57$  (d,  $J = 9.2$  Hz, 2 H, Ar-H),  $7.33$ - $7.25$  (m, 2 H, Ar-H),  $7.25$ - $7.16$  (m, 3 H, Ar-H),  $6.80$ - $6.60$  (m, 3 H, =CH and Ar-H),  $5.27$  (d,  $J = 10.8$  Hz, 1 H, one proton of =CH<sub>2</sub>),  $4.98$  (d,  $J = 17.6$  Hz, 1 H, one proton of =CH<sub>2</sub>),  $3.71$  (s, 3 H, CH<sub>3</sub>),  $2.38$ - $2.07$  (m, 2 H, CH<sub>2</sub>),  $1.26$ - $0.95$  (m, 8 H, CH<sub>2</sub> x 4),  $0.80$  (t,  $J = 6.8$  Hz, 3 H, CH<sub>3</sub>);  $^{13}\text{C NMR}$  (100 MHz,  $\text{CDCl}_3$ )  $\delta = 198.9$ ,  $162.1$ ,  $143.1$ ,  $140.0$ ,  $132.4$ ,  $128.7$ ,  $128.6$ ,  $127.0$ ,  $126.6$ ,

116.8, 112.9, 61.2, 55.1, 39.0, 31.5, 29.8, 23.9, 22.5, 13.9; **IR** (neat):  $\nu$  = 3083, 3060, 3024, 2928, 2856, 1669, 1598, 1575, 1508, 1459, 1446, 1417, 1307, 1258, 1238, 1169, 1117, 1030  $\text{cm}^{-1}$ ; **MS** (70 eV, EI)  $m/z$  (%): 336 ( $\text{M}^+$ , 1.02), 135 (100); **HRMS** calcd.  $m/z$  for  $\text{C}_{23}\text{H}_{28}\text{O}_2$  ( $\text{M}^+$ ): 336.2084; Found: 336.2086.

**(19) Preparation of (*R*)-3-phenyl-3-hexylpent-4-en-2-one [(*R*)-3ah] (Yy-4-038)**

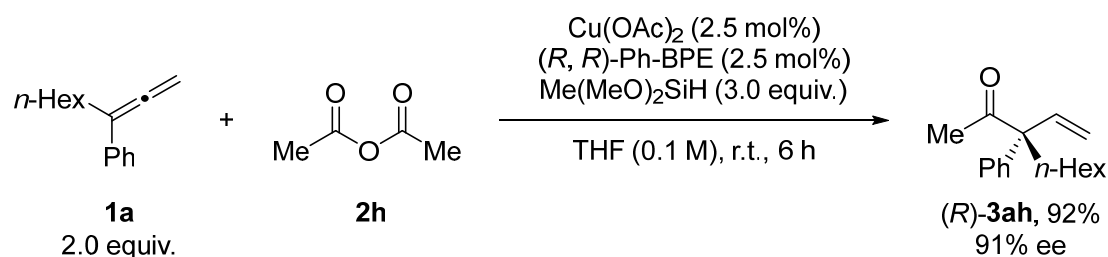

Following **Typical Procedure III**, the reaction of acetic anhydride **2h** (102.1 mg, 1.0 mmol),  $\text{Cu}(\text{OAc})_2$  (4.5 mg, 0.025 mmol),  $(R,R)$ -Ph-BPE (12.7 mg, 0.025 mmol), allene **1a** (400.6 mg, 2.0 mmol) in THF (8 mL), and dimethoxymethylsilane (318.6 mg,  $d = 0.861 \text{ g/mL}$ , 0.37 mL, 3.0 mmol, in 2 mL THF) afforded (*R*)-**3ah** (225.3 mg, 92% yield) as a colorless oil (eluent: Petroleum ether (300 mL) to Petroleum ether/EtOAc = 100/1 (~ 600 mL)): 91% ee (HPLC conditions: AS-H column, hexane/*i*-PrOH = 98/2, 1.0 mL/min,  $\lambda = 214 \text{ nm}$ ,  $t_R$  (major) = 3.9 min,  $t_R$  (minor) = 4.6 min;  $[\alpha]_D^{24} = +10.7$  ( $c = 1.14$ ,  $\text{CHCl}_3$ ); **<sup>1</sup>H NMR** (400 MHz,  $\text{CDCl}_3$ )  $\delta = 7.34$  (t,  $J = 7.4 \text{ Hz}$ , 2 H, Ar-H), 7.26 (t,  $J = 7.2 \text{ Hz}$ , 1 H, Ar-H), 7.19 (d,  $J = 7.6 \text{ Hz}$ , 2 H, Ar-H), 6.48 (dd,  $J_1 = 17.6 \text{ Hz}$ ,  $J_2 = 10.8 \text{ Hz}$ , 1 H, =CH), 5.35 (d,  $J = 10.8 \text{ Hz}$ , 1 H, one proton of =CH<sub>2</sub>), 4.99 (d,  $J = 17.6 \text{ Hz}$ , 1 H, one proton of =CH<sub>2</sub>), 2.14-1.97 (m, 2 H, CH<sub>2</sub>), 1.94 (s, 3 H, CH<sub>3</sub>), 1.35-0.94 (m, 8 H, CH<sub>2</sub> x 4), 0.84 (t,  $J = 6.6 \text{ Hz}$ , 3 H, CH<sub>3</sub>); **<sup>13</sup>C NMR** (100 MHz,  $\text{CDCl}_3$ )  $\delta = 208.1$ , 141.5, 138.9, 128.6, 127.4, 126.9, 117.2, 63.3, 35.9, 31.5, 29.9, 26.8, 24.1, 22.5, 14.0; **IR** (neat):  $\nu$  = 3085, 3059, 3024, 2953, 2927, 2857, 1709, 1632, 1599, 1494, 1446, 1352, 1174, 1119, 1082, 1004  $\text{cm}^{-1}$ ; **MS** (70 eV, EI)  $m/z$  (%): 244 ( $\text{M}^+$ , 2.25), 117 (100); **HRMS** calcd.  $m/z$  for  $\text{C}_{17}\text{H}_{24}\text{O}$  ( $\text{M}^+$ ): 244.1822; Found: 244.1823.

**(20) Preparation of (*R*)-4-phenyl-4-hexylhex-5-en-3-one [(*R*)-3ai] (Yy-4-096)**

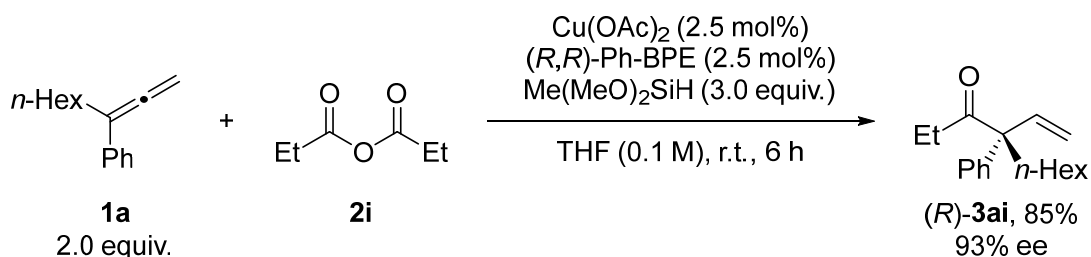

Following **Typical Procedure III**, the reaction of propionic anhydride **2i** (130.6 mg, 1.0 mmol), Cu(OAc)<sub>2</sub> (4.5 mg, 0.025 mmol), (*R,R*)-Ph-BPE (12.7 mg, 0.025 mmol), allene **1a** (400.6 mg, 2.0 mmol) in THF (8 mL), and dimethoxymethylsilane (318.6 mg, d = 0.861 g/mL, 0.37 mL, 3.0 mmol, in 2 mL THF) afforded (*R*)-**3ai** (220.1 mg, 85% yield) as a colorless oil (eluent: Petroleum ether (300 mL) to Petroleum ether/EtOAc = 100/1 (~ 600 mL)): 93% ee (HPLC conditions: AS-H column, hexane/*i*-PrOH = 99.5/0.5, 1.0 mL/min, λ = 214 nm, t<sub>R</sub> (major) = 3.8 min, t<sub>R</sub> (minor) = 4.1 min; [α]<sub>D</sub><sup>23</sup> = +14.2 (c = 0.95, CHCl<sub>3</sub>); <sup>1</sup>H NMR (400 MHz, CDCl<sub>3</sub>) δ = 7.33 (t, *J* = 7.6 Hz, 2 H, Ar-H), 7.25 (t, *J* = 7.2 Hz, 1 H, Ar-H), 7.18 (d, *J* = 7.6 Hz, 2 H, Ar-H), 6.50 (dd, *J*<sub>1</sub> = 17.8 Hz, *J*<sub>2</sub> = 11.0 Hz, 1 H, =CH), 5.33 (d, *J* = 10.8 Hz, 1 H, one proton of =CH<sub>2</sub>), 4.97 (d, *J* = 18.0 Hz, 1 H, one proton of =CH<sub>2</sub>), 2.34-1.96 (m, 4 H, CH<sub>2</sub> x 2), 1.32-0.97 (m, 8 H, CH<sub>2</sub> x 4), 0.94 (t, *J* = 7.4 Hz, 3 H, CH<sub>3</sub>), 0.84 (t, *J* = 6.6 Hz, 3 H, CH<sub>3</sub>); <sup>13</sup>C NMR (100 MHz, CDCl<sub>3</sub>) δ = 211.2, 141.7, 139.1, 128.5, 127.5, 126.8, 117.0, 63.1, 35.9, 32.2, 31.6, 29.9, 24.1, 22.6, 14.0, 8.8; IR (neat): ν = 3084, 3062, 3023, 2929, 2857, 1709, 1494, 1459, 1446, 1409, 1376, 1339, 1102, 1006 cm<sup>-1</sup>; MS (70 eV, EI) *m/z* (%): 258 (M<sup>+</sup>, 2.70), 117 (100); HRMS calcd. *m/z* for C<sub>18</sub>H<sub>26</sub>O (M<sup>+</sup>): 258.1978; Found: 258.1984.

#### (21) Preparation of (*S*)-4-phenyl-4-hexylhex-5-en-3-one [(*S*)-**3ai**] (Yy-4-100)

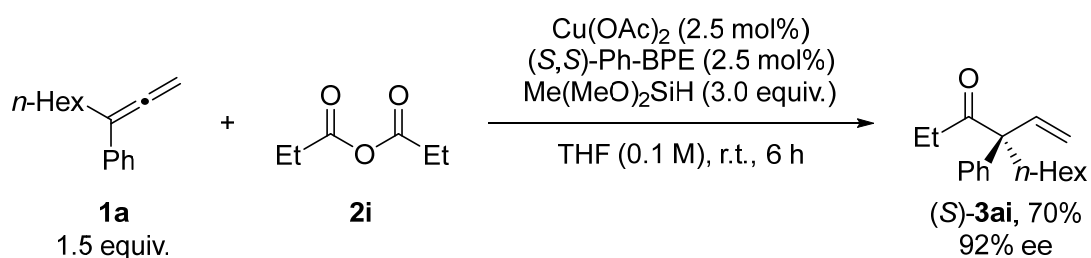

Following **Typical Procedure III**, the reaction of propionic anhydride **2i** (64.5 mg, 0.5 mmol), Cu(OAc)<sub>2</sub> (2.3 mg, 0.0127 mmol), (*S,S*)-Ph-BPE (6.3 mg, 0.0124 mmol),

allene **1a** (150.1 mg, 0.75 mmol) in THF (4 mL), and dimethoxymethylsilane (163.6 mg, d = 0.861 g/mL, 0.19 mL, 1.5 mmol, in 1 mL THF) afforded (*S*)-**3ai** (89.8 mg, 70% yield) as a colorless oil (eluent: Petroleum ether (300 mL) to Petroleum ether/EtOAc = 100/1 (~ 500 mL)): 92% ee (HPLC conditions: AS-H column, hexane/*i*-PrOH = 99.5/0.5, 1.0 mL/min,  $\lambda$  = 214 nm,  $t_R$  (major) = 4.1 min,  $t_R$  (minor) = 3.8 min;  $[\alpha]_D^{23}$  = -13.1 (c = 0.51, CHCl<sub>3</sub>); **<sup>1</sup>H NMR** (400 MHz, CDCl<sub>3</sub>)  $\delta$  = 7.34 (t,  $J$  = 7.6 Hz, 2 H, Ar-H), 7.25 (t,  $J$  = 7.2 Hz, 1 H, Ar-H), 7.18 (d,  $J$  = 8.0 Hz, 2 H, Ar-H), 6.49 (dd,  $J_1$  = 18.0 Hz,  $J_2$  = 10.8 Hz, 1 H, =CH), 5.33 (d,  $J$  = 10.8 Hz, 1 H, one proton of =CH<sub>2</sub>), 4.97 (d,  $J$  = 18.0 Hz, 1 H, one proton of =CH<sub>2</sub>), 2.34-1.98 (m, 4 H, CH<sub>2</sub> x 2), 1.32-0.96 (m, 8 H, CH<sub>2</sub> x 4), 0.94 (t,  $J$  = 7.4 Hz, 3 H, CH<sub>3</sub>), 0.84 (t,  $J$  = 6.8 Hz, 3 H, CH<sub>3</sub>); **<sup>13</sup>C NMR** (100 MHz, CDCl<sub>3</sub>)  $\delta$  = 211.3, 141.7, 139.1, 128.5, 127.5, 126.8, 117.1, 63.1, 35.9, 32.2, 31.6, 29.9, 24.2, 22.6, 14.0, 8.8; **IR** (neat):  $\nu$  = 3084, 3062, 3023, 2928, 2857, 1709, 1494, 1459, 1446, 1408, 1376, 1339, 1103, 1006 cm<sup>-1</sup>; **MS** (70 eV, EI)  $m/z$  (%): 258 (M<sup>+</sup>, 3.15), 117 (100); **HRMS** calcd.  $m/z$  for C<sub>18</sub>H<sub>26</sub>O (M<sup>+</sup>): 258.1978; Found: 258.1981.

**(22) Preparation of (*R*)-5-phenyl-5-hexylhept-6-en-4-one [(*R*)-**3aj**] (Yy-4-098)**

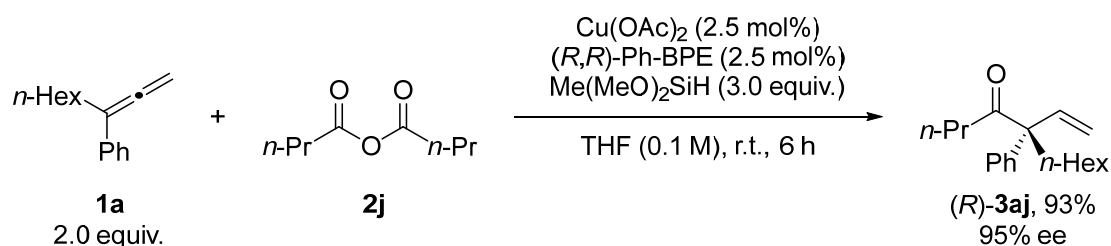

Following **Typical Procedure III**, the reaction of butyric anhydride **2j** (158.9 mg, 1.0 mmol), Cu(OAc)<sub>2</sub> (4.5 mg, 0.025 mmol), (*R,R*)-Ph-BPE (12.7 mg, 0.025 mmol), allene **1a** (400.6 mg, 2.0 mmol) in THF (8 mL), and dimethoxymethylsilane (318.6 mg, d = 0.861 g/mL, 0.37 mL, 3.0 mmol, in 2 mL THF) afforded (*R*)-**3aj** (253.9 mg, 93% yield) as a colorless oil (eluent: Petroleum ether (300 mL) to Petroleum ether/EtOAc = 100/1 (~ 600 mL)): 95% ee (HPLC conditions: AS-H column, hexane, 0.3 mL/min,  $\lambda$  = 214 nm,  $t_R$  (major) = 19.0 min,  $t_R$  (minor) = 21.9 min;  $[\alpha]_D^{23}$  = +16.2 (c = 1.17, CHCl<sub>3</sub>); **<sup>1</sup>H NMR** (400 MHz, CDCl<sub>3</sub>)  $\delta$  = 7.34 (t,  $J$  = 7.6 Hz, 2 H, Ar-H), 7.30-7.22 (m, 1 H, Ar-H), 7.22-7.15 (m, 2 H, Ar-H), 6.49 (dd,  $J_1$  = 17.6 Hz,  $J_2$  = 10.8

Hz, 1 H, =CH), 5.34 (d,  $J = 10.8$  Hz, 1 H, one proton of =CH<sub>2</sub>), 4.99 (d,  $J = 18.0$  Hz, 1 H, one proton of =CH<sub>2</sub>), 2.30-1.96 (m, 4 H, CH<sub>2</sub> x 2), 1.55-1.40 (m, 2 H, CH<sub>2</sub>), 1.30-0.90 (m, 8 H, CH<sub>2</sub> x 4), 0.84 (t,  $J = 6.8$  Hz, 3 H, CH<sub>3</sub>), 0.76 (t,  $J = 7.4$  Hz, 3 H, CH<sub>3</sub>); <sup>13</sup>C NMR (100 MHz, CDCl<sub>3</sub>)  $\delta = 210.3, 141.6, 139.0, 128.5, 127.6, 126.8, 117.2, 63.1, 41.0, 35.8, 31.6, 29.9, 24.1, 22.6, 17.9, 14.0, 13.7$ ; IR (neat):  $\nu = 3084, 3059, 3022, 2956, 2928, 2871, 1708, 1494, 1465, 1446, 1408, 1378, 1354, 1134, 1116, 1059, 1004$  cm<sup>-1</sup>; MS (70 eV, EI)  $m/z$  (%): 272 (M<sup>+</sup>, 3.00), 117 (100); HRMS calcd.  $m/z$  for C<sub>19</sub>H<sub>28</sub>O (M<sup>+</sup>): 272.2135; Found: 272.2139.

### (23) Preparation of (*S*)-5-phenyl-5-hexylhept-6-en-4-one [(*S*)-**3aj**] (Yy-4-101)

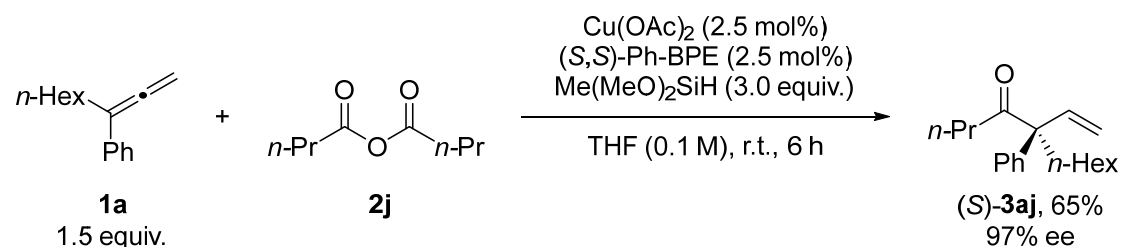

Following **Typical Procedure III**, the reaction of butyric anhydride **2j** (78.8 mg, 0.5 mmol), Cu(OAc)<sub>2</sub> (2.3 mg, 0.0127 mmol), (*S,S*)-Ph-BPE (6.3 mg, 0.0124 mmol), allene **1a** (150.2 mg, 0.75 mmol) in THF (4 mL), and dimethoxymethylsilane (163.6 mg, d = 0.861 g/mL, 0.19 mL, 1.5 mmol, in 1 mL THF) afforded (*S*)-**3aj** (88.2 mg, 65% yield) as a colorless oil (eluent: Petroleum ether (300 mL) to Petroleum ether/EtOAc = 100/1 (~ 500 mL)): 97% ee (HPLC conditions: AS-H column, hexane, 1.0 mL/min,  $\lambda = 214$  nm,  $t_R$  (major) = 21.0 min,  $t_R$  (minor) = 19.1 min;  $[\alpha]_D^{23} = -15.4$  (c = 0.51, CHCl<sub>3</sub>); <sup>1</sup>H NMR (400 MHz, CDCl<sub>3</sub>)  $\delta = 7.34$  (t,  $J = 7.4$  Hz, 2 H, Ar-H), 7.30-7.21 (m, 1 H, Ar-H), 7.21-7.14 (m, 2 H, Ar-H), 6.49 (dd,  $J_1 = 17.6$  Hz,  $J_2 = 10.8$  Hz, 1 H, =CH), 5.34 (d,  $J = 10.8$  Hz, 1 H, one proton of =CH<sub>2</sub>), 4.99 (d,  $J = 18.0$  Hz, 1 H, one proton of =CH<sub>2</sub>), 2.30-1.97 (m, 4 H, CH<sub>2</sub> x 2), 1.55-1.40 (m, 2 H, CH<sub>2</sub>), 1.30-0.90 (m, 8 H, CH<sub>2</sub> x 4), 0.84 (t,  $J = 6.8$  Hz, 3 H, CH<sub>3</sub>), 0.76 (t,  $J = 7.4$  Hz, 3 H, CH<sub>3</sub>); <sup>13</sup>C NMR (100 MHz, CDCl<sub>3</sub>)  $\delta = 210.3, 141.6, 139.0, 128.5, 127.6, 126.8, 117.2, 63.1, 41.0, 35.8, 31.6, 29.9, 24.1, 22.6, 17.9, 14.0, 13.7$ ; IR (neat):  $\nu = 3084, 3063, 3024, 2956, 2928, 2871, 1708, 1494, 1465, 1446, 1408, 1378, 1354, 1278,$

1116, 1059, 1003  $\text{cm}^{-1}$ ; **MS** (70 eV, EI)  $m/z$  (%): 272 ( $\text{M}^+$ , 3.32), 117 (100); **HRMS** calcd.  $m/z$  for  $\text{C}_{19}\text{H}_{28}\text{O}$  ( $\text{M}^+$ ): 272.2135; Found: 272.2135.

**(24) Preparation of (*R*)-2-(4-bromophenyl)-2-methyl-1-phenylbut-3-en-1-one [(*R*)-3ka] on gram scale (Yy-4-102)**

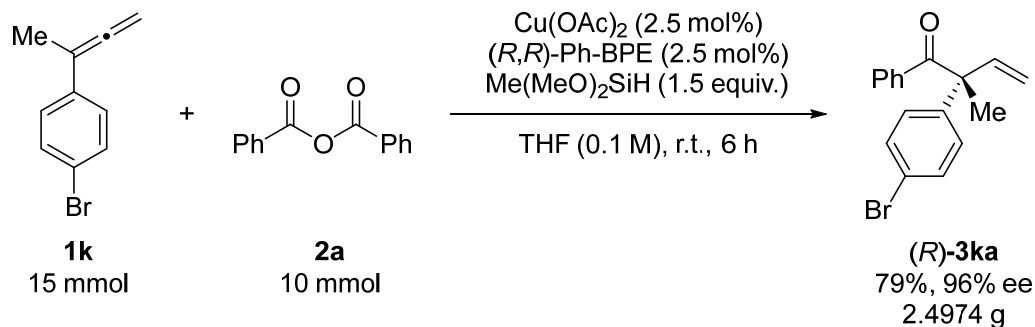

Following **Typical Procedure III**, the reaction of benzoic anhydride **2a** (2.2625 g, 10.0 mmol),  $\text{Cu}(\text{OAc})_2$  (45.4 mg, 0.25 mmol), (*R,R*)-Ph-BPE (126.7 mg, 0.25 mmol), allene **1k** (3.1364 g, 15.0 mmol) in THF (80 mL) and dimethoxymethylsilane (1.5929 g,  $d = 0.861 \text{ g/mL}$ , 1.85 mL, 15.0 mmol, in 20 mL THF) afforded (*R*)-**3ka** (2.4974 g, 79% yield) as a colorless oil (eluent: Petroleum ether (600 mL) to Petroleum ether/EtOAc = 100/1 (~ 2000 mL)): 96% ee (HPLC conditions: AD-H column, hexane/*i*-PrOH = 99/1, 1.0 mL/min,  $\lambda = 214 \text{ nm}$ ,  $t_R$  (major) = 7.8 min,  $t_R$  (minor) = 9.5 min;  **$^1\text{H NMR}$**  (400 MHz,  $\text{CDCl}_3$ )  $\delta = 7.46$  (d,  $J = 7.2 \text{ Hz}$ , 2 H, Ar-H), 7.39 (d,  $J = 8.4 \text{ Hz}$ , 2 H, Ar-H), 7.32 (t,  $J = 7.2 \text{ Hz}$ , 1 H, Ar-H), 7.18 (t,  $J = 7.6 \text{ Hz}$ , 2 H, Ar-H), 7.07 (d,  $J = 8.4 \text{ Hz}$ , 2 H, Ar-H), 6.50 (dd,  $J_1 = 17.2 \text{ Hz}$ ,  $J_2 = 10.8 \text{ Hz}$ , 1 H, =CH), 5.24 (d,  $J = 10.8 \text{ Hz}$ , 1 H, one proton of = $\text{CH}_2$ ), 5.09 (d,  $J = 17.6 \text{ Hz}$ , 1 H, one proton of = $\text{CH}_2$ ), 1.57 (s, 3 H,  $\text{CH}_3$ );  **$^{13}\text{C NMR}$**  (100 MHz,  $\text{CDCl}_3$ )  $\delta = 200.2$ , 143.6, 140.4, 135.8, 132.10, 132.06, 130.0, 128.2, 128.1, 121.0, 117.0, 58.1, 26.0.

## 5. Synthetic applications:

### (1) Synthesis of (Z)-2-(4-bromophenyl)-2-methyl-1-phenylbut-3-en-1-one oxime [(Z)-4] (Yy-5-007)<sup>9</sup>

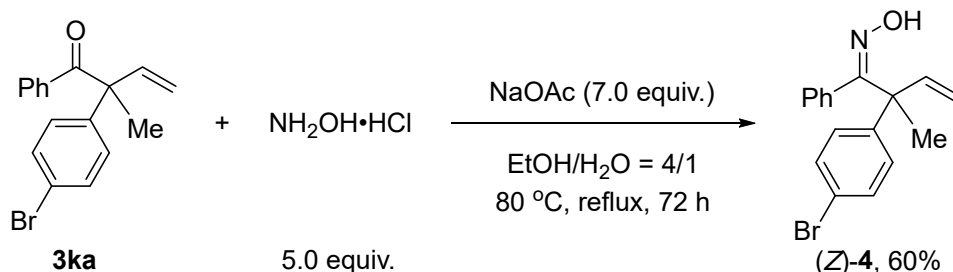

To a Schlenk tube were added  $\text{NH}_2\text{OH}\cdot\text{HCl}$  (173.7 mg, 2.5 mmol)/ $\text{H}_2\text{O}$  (1 mL),  $\text{NaOAc}$  (287.3 mg, 3.50 mmol)/ $\text{EtOH}$  (1 mL), and **3ka** (157.9 mg, 0.5 mmol)/ $\text{EtOH}$  (3 mL) sequentially under argon. The resulting mixture was allowed to reflux at 80 °C for 72 h and then cooled to room temperature and diluted with 5 mL of  $\text{CH}_2\text{Cl}_2$  and 5 mL of  $\text{H}_2\text{O}$ . After extraction with  $\text{CH}_2\text{Cl}_2$  (10 mL x 3), the organic layer was combined and concentrated *in vacuo*, the residue was purified by column chromatography on silica gel to afford (Z)-4 (105.9 mg, 94% purity, 60% yield) as a white solid: m.p. 130.2-130.9 °C (Petroleum ether/  $\text{CH}_2\text{Cl}_2$ ) (eluent: petroleum ether/ethyl acetate = 100/1 (~ 200 mL) to 10/1 (~ 330 mL)); <sup>1</sup>H NMR (400 MHz,  $\text{CDCl}_3$ )  $\delta$  = 8.18 (s, 1 H, N-OH), 7.47 (d,  $J$  = 8.4 Hz, 2 H, Ar-H), 7.30-7.16 (m, 5 H, Ar-H), 6.81(d,  $J$  = 6.8 Hz, 2 H, Ar-H), 6.26 (dd,  $J_1$  = 17.4 Hz,  $J_2$  = 10.6 Hz, 1 H, =CH), 5.19 (d,  $J$  = 10.8 Hz, 1 H, one proton of = $\text{CH}_2$ ), 4.92 (d,  $J$  = 17.6 Hz, 1 H, one proton of = $\text{CH}_2$ ), 1.51 (s, 3 H,  $\text{CH}_3$ ); <sup>13</sup>C NMR (100 MHz,  $\text{CDCl}_3$ )  $\delta$  = 163.1, 142.7, 142.1, 132.7, 131.4, 129.5, 128.4, 127.92, 127.91, 121.0, 114.6, 51.3, 24.1; IR (neat):  $\nu$  = 3271, 1636, 1489, 1443, 1410, 1395, 1371, 1267, 1080, 1007  $\text{cm}^{-1}$ ; MS (70 eV, EI)  $m/z$  (%): 331 [ $\text{M}^{(81}\text{Br})^+$ , 17.98], 329 [ $\text{M}^{(79}\text{Br})^+$ , 17.32], 130 (100); Anal. calcd. for  $\text{C}_{17}\text{H}_{16}\text{BrNO}$  ( $\text{M}^+$ ): C 61.83, H 4.88; Found: C 61.81, H 4.98.

### (2) Synthesis of (R,Z)-2-(4-bromophenyl)-2-methyl-1-phenylbut-3-en-1-one oxime [(R,Z)-4] (Yy-5-008)<sup>9</sup>



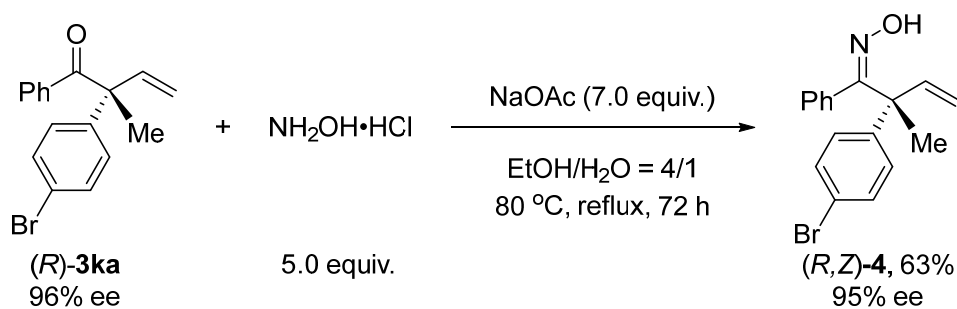

To a Schlenk tube were added  $\text{NH}_2\text{OH}\cdot\text{HCl}$  (69.5 mg, 1.0 mmol)/ $\text{H}_2\text{O}$  (0.4 mL),  $\text{NaOAc}$  (114.8 mg, 1.4 mmol), and  $(R)\text{-3ka}$  (63.0 mg, 0.2 mmol)/ $\text{EtOH}$  (1.6 mL) sequentially under argon. The resulting mixture was allowed to reflux at 80 °C for 72 h and then cooled to room temperature and diluted with 5 mL of  $\text{CH}_2\text{Cl}_2$  and 5 mL of  $\text{H}_2\text{O}$ . After extraction with  $\text{CH}_2\text{Cl}_2$  (5 mL x 3), the organic layer was combined and concentrated *in vacuo*, the residue was purified by column chromatography on silica gel to afford  $(R,Z)\text{-4}$  (42.8 mg, 97% purity, 63% yield) as a white solid: m.p. 125.0-125.8 °C (Petroleum ether/  $\text{CH}_2\text{Cl}_2$ ) (eluent: petroleum ether/ethyl acetate = 100/1 (~ 200 mL) to 10/1 (~ 220 mL)): 95% ee (HPLC conditions: AD-H column, hexane/*i*-PrOH = 97/3, 1.0 mL/min,  $\lambda = 214$  nm,  $t_R$  (major) = 22.1 min,  $t_R$  (minor) = 21.0 min;  $[\alpha]_D^{25} = -14.0$  ( $c = 1.04$ ,  $\text{CHCl}_3$ );  $^1\text{H NMR}$  (400 MHz,  $\text{CDCl}_3$ )  $\delta = 8.05$  (s, 1 H, N-OH), 7.47 (d,  $J = 8.4$  Hz, 2 H, Ar-H), 7.30-7.20 (m, 5 H, Ar-H), 6.81 (m, 2 H, Ar-H), 6.27 (dd,  $J_1 = 17.6$  Hz,  $J_2 = 10.8$  Hz, 1 H, =CH), 5.19 (d,  $J = 10.8$  Hz, 1 H, one proton of = $\text{CH}_2$ ), 4.93 (d,  $J = 17.6$  Hz, 1 H, one proton of = $\text{CH}_2$ ), 1.51 (s, 3 H,  $\text{CH}_3$ );  $^{13}\text{C NMR}$  (100 MHz,  $\text{CDCl}_3$ )  $\delta = 163.1, 142.8, 142.1, 132.7, 131.4, 129.5, 128.4, 127.93, 127.92, 121.0, 114.6, 51.3, 24.2$ ; **IR** (neat):  $\nu = 3229, 1634, 1489, 1464, 1445, 1412, 1395, 1263, 1078, 1024, 1007$   $\text{cm}^{-1}$ ; **MS** (70 eV, EI)  $m/z$  (%): 331 [ $\text{M}^{(81}\text{Br})^+$ , 16.25], 329 [ $\text{M}^{(79}\text{Br})^+$ , 16.21], 130 (100); **Anal.** calcd. for  $\text{C}_{17}\text{H}_{16}\text{BrNO}$  ( $\text{M}^+$ ): C 61.83, H 4.88; Found: C 61.98, H 5.15.

**(3) Synthesis of 2-methyl-2-(3'-nitro-[1,1'-biphenyl]-4-yl)-1-phenylbut-3-en-1-one**  
**(5) (Yy-4-110)<sup>10</sup>**

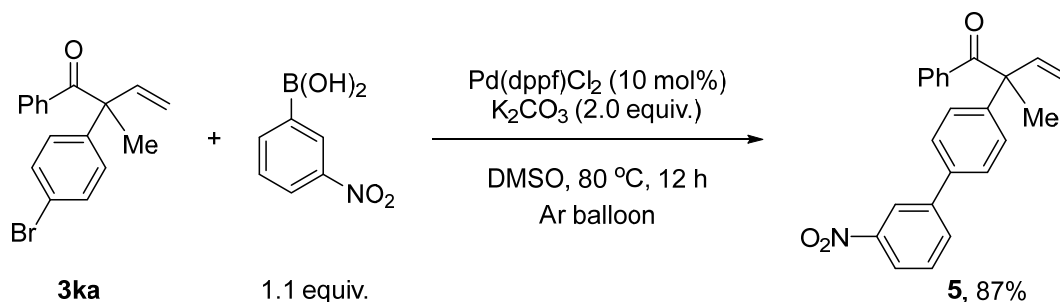

To a flame-dried Schlenk tube were added Pd(dppf)Cl<sub>2</sub> (14.6 mg, 0.02 mmol), (3-nitrophenyl)boronic acid (36.7 mg, 0.22 mmol), K<sub>2</sub>CO<sub>3</sub> (55.3 mg, 0.4 mmol), and **3ka** (63.0 mg, 0.2 mmol) sequentially. After addition of all these chemicals, the tube was degassed and refilled with argon for three times. Then DMSO (2 mL) was added under argon. The resulting mixture was stirred at 80 °C with a balloon of argon for 12 h, diluted with 2 mL of ethyl acetate, cooled to room temperature, and quenched with 10 mL of H<sub>2</sub>O. After extraction with ethyl acetate (10 mL x 3) and washing with a saturated solution of NaCl (10 mL x 3), the organic layer was dried over anhydrous Na<sub>2</sub>SO<sub>4</sub>. After filtration and concentration *in vacuo*, the residue was purified by column chromatography on silica gel to afford **5** (61.9 mg, 87% yield) as a yellow oil (eluent: petroleum ether/ethyl acetate = 50/1); <sup>1</sup>H NMR (400 MHz, CDCl<sub>3</sub>) δ = 8.44 (s, 1 H, Ar-H), 8.18 (d, *J* = 8.0 Hz, 1 H, Ar-H), 7.91 (d, *J* = 7.6 Hz, 1 H, Ar-H), 7.70-7.53 (m, 5 H, Ar-H), 7.47-7.34 (m, 3 H, Ar-H), 7.26 (t, *J* = 7.6 Hz, 2 H, Ar-H), 6.67 (dd, *J*<sub>1</sub> = 17.4 Hz, *J*<sub>2</sub> = 10.6 Hz, 1 H, =CH), 5.35 (d, *J* = 10.58 Hz, 1 H, one proton of =CH<sub>2</sub>), 5.21 (d, *J* = 17.6 Hz, 1 H, one proton of =CH<sub>2</sub>), 1.72 (s, 3 H, CH<sub>3</sub>); <sup>13</sup>C NMR (100 MHz, CDCl<sub>3</sub>) δ = 200.4, 148.7, 145.0, 142.0, 140.6, 137.1, 135.9, 132.8, 132.0, 130.0, 129.7, 128.0, 127.7, 127.2, 122.0, 121.7, 116.9, 58.2, 26.0; IR (neat): ν = 3064, 2968, 2935, 2878, 1676, 1596, 1487, 1445, 1397, 1344, 1303, 1232, 1182, 1151, 1106, 1088, 1075, 1005 cm<sup>-1</sup>; MS (70 eV, EI) *m/z* (%): 357 (M<sup>+</sup>, 0.19), 252 (M<sup>+</sup>-PhCO, 2.88), 105 (100); HRMS Calcd *m/z* for C<sub>23</sub>H<sub>19</sub>NO<sub>3</sub>: 357.1359; Found: 357.1359.

**(4) Synthesis of (*R*)-2-methyl-2-(3'-nitro-[1,1'-biphenyl]-4-yl)-1-phenylbut-3-en-1-one [(*R*)-**5**] (Yy-4-103)<sup>10</sup>**

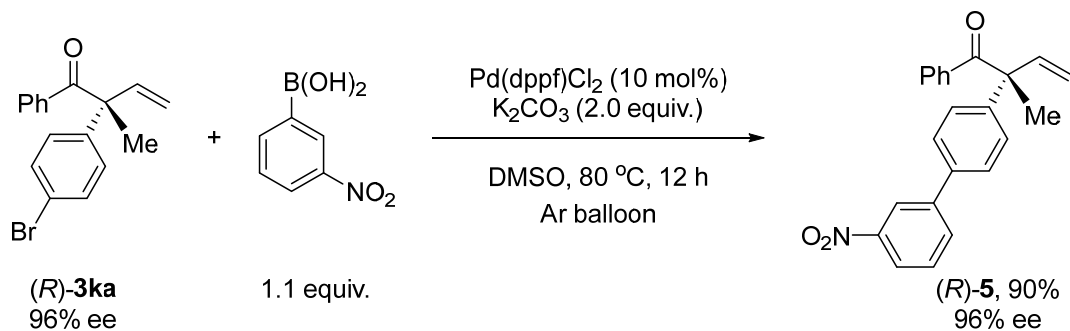

To a flame-dried Schlenk tube were added Pd(dppf)Cl<sub>2</sub> (14.6 mg, 0.02 mmol), (3-nitrophenyl)boronic acid (36.7 mg, 0.22 mmol), K<sub>2</sub>CO<sub>3</sub> (55.4 mg, 0.4 mmol), and (*R*)-**3ka** (63.0 mg, 0.2 mmol) sequentially. After addition of all these chemicals, the tube was degassed and refilled with argon for three times. Then DMSO (2 mL) was added under argon. The resulting mixture was stirred at 80 °C with a balloon of argon for 12 h, diluted with 2 mL of ethyl acetate, cooled to room temperature, and quenched with 10 mL of H<sub>2</sub>O. After extraction with ethyl acetate (10 mL x 3) and washing with a saturated solution of NaCl (10 mL x 3), the organic layer was dried over anhydrous Na<sub>2</sub>SO<sub>4</sub>. After filtration and concentration *in vacuo*, the residue was purified by column chromatography on silica gel to afford (*R*)-**5** (64.6 mg, 90% yield) as a yellow oil (eluent: petroleum ether/ethyl acetate = 50/1): 96% ee (HPLC conditions: AD-H column, hexane/*i*-PrOH = 85/15, 0.5 mL/min, λ = 214 nm, *t<sub>R</sub>* (major) = 17.7 min, *t<sub>R</sub>* (minor) = 16.9 min; [α]<sub>D</sub><sup>27</sup> = +77.7 (c = 1.08, CHCl<sub>3</sub>); <sup>1</sup>H NMR (400 MHz, CDCl<sub>3</sub>) δ = 8.50 (s, 1 H, Ar-H), 8.19 (d, *J* = 8.0 Hz, 1 H, Ar-H), 7.91 (d, *J* = 7.6 Hz, 1 H, Ar-H), 7.70-7.55 (m, 5 H, Ar-H), 7.46-7.35 (m, 3 H, Ar-H), 7.26 (t, *J* = 7.6 Hz, 2 H, Ar-H), 6.66 (dd, *J*<sub>1</sub> = 17.6 Hz, *J*<sub>2</sub> = 10.8 Hz, 1 H, =CH), 5.35 (d, *J* = 10.58 Hz, 1 H, one proton of =CH<sub>2</sub>), 5.21 (d, *J* = 17.6 Hz, 1 H, one proton of =CH<sub>2</sub>), 1.72 (s, 3 H, CH<sub>3</sub>); <sup>13</sup>C NMR (100 MHz, CDCl<sub>3</sub>) δ = 200.4, 148.7, 145.0, 142.1, 140.6, 137.2, 135.9, 132.8, 132.0, 130.0, 129.7, 128.0, 127.7, 127.2, 122.1, 121.8, 116.9, 58.3, 26.0; IR (neat): ν = 3065, 2970, 2936, 2879, 1676, 1594, 1488, 1455, 1446, 1397, 1384, 1232, 1182, 1152, 1106, 1089, 1075, 1005 cm<sup>-1</sup>; MS (70 eV, EI) *m/z* (%): 357 (M<sup>+</sup>, 0.57), 252 (M<sup>+</sup>-PhCO, 3.24), 105 (100); HRMS Calcd *m/z* for C<sub>23</sub>H<sub>19</sub>NO<sub>3</sub>: 357.1359; Found: 357.1364.

(5) Synthesis of 3-(4-bromophenyl)-3-methyl-4-oxo-4-phenylbutanal (6) (Yy-4-150)<sup>11</sup>

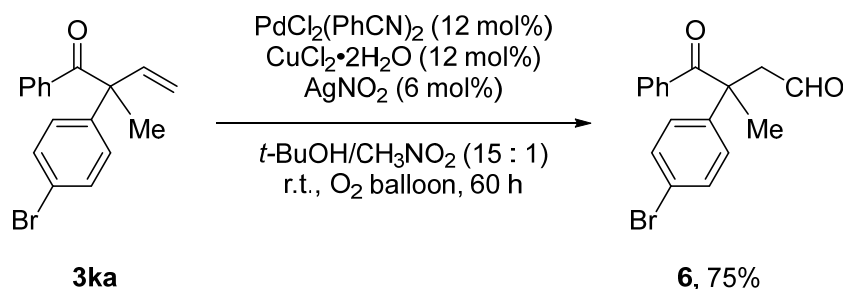

To a Schlenk tube were added  $\text{Pd}(\text{PhCN})_2\text{Cl}_2$  (9.2 mg, 0.024 mmol),  $\text{CuCl}_2 \cdot 2\text{H}_2\text{O}$  (3.6 mg, 0.024 mmol) and  $\text{AgNO}_2$  (1.8 mg, 0.012 mmol). After the addition of  $\text{CH}_3\text{NO}_2$  and  $t\text{-BuOH}$ , the mixture was stirred at room temperature and sparged with  $\text{O}_2$  (balloon) for 3 minutes. Then **3ka** (63.0 mg, 0.2 mmol) was added and the resulting mixture was allowed to stirred at room temperature and sparged with  $\text{O}_2$  (balloon) for another 3 minutes. The mixture was then stirred at room temperature for 60 h with a balloon of  $\text{O}_2$ . After that, the reaction mixture was diluted with water (4 mL) and extracted with dichloromethane (5 mL x 3). The organic phase was dried over anhydrous  $\text{Na}_2\text{SO}_4$ , then filtered and concentrated in *vacuo*. The residue was purified by column chromatography on silica gel to afford **6** (49.6 mg, 75% yield) as a yellow oil (eluent: petroleum ether/ethyl acetate = 15/1);  $^1\text{H NMR}$  (400 MHz,  $\text{CDCl}_3$ )  $\delta$  = 9.69 (s, 1 H, CHO), 7.52 (d,  $J$  = 8.4 Hz, 2 H, Ar-H), 7.49-7.36 (m, 3 H, Ar-H), 7.31-7.14 (m, 4 H, Ar-H), 3.08 (d,  $J$  = 16.0 Hz, 1 H, one proton of  $\text{CH}_2$ ), 2.79 (d,  $J$  = 16.0 Hz, 1 H, one proton of  $\text{CH}_2$ ), 1.82 (s, 3 H,  $\text{CH}_3$ );  $^{13}\text{C NMR}$  (100 MHz,  $\text{CDCl}_3$ )  $\delta$  = 201.6, 200.3, 141.4, 135.3, 132.5, 132.3, 129.6, 128.2, 127.8, 121.7, 54.5, 53.2, 23.4; **IR** (neat):  $\nu$  = 3061, 2987, 2941, 2838, 2739, 1718, 1672, 1596, 1578, 1488, 1446, 1397, 1258, 1236, 1182, 1147, 1083, 1008  $\text{cm}^{-1}$ ; **MS** (ESI)  $m/z$  (%): 331 [ $\text{M}(^{79}\text{Br})+\text{H}$ ] $^+$ ; **HRMS** Calcd  $m/z$  for  $\text{C}_{17}\text{H}_{16}^{79}\text{BrO}_2(\text{M}+\text{H})^+$ : 331.0328; Found: 331.0313.

(6) Synthesis of (*R*)-3-(4-bromophenyl)-3-methyl-4-oxo-4-phenylbutanal [(*R*)-6] (Yy-4-146)<sup>11</sup>

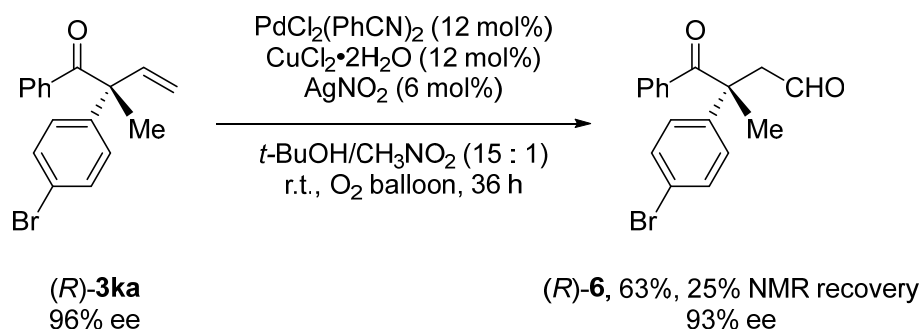

To a Schlenk tube were added  $\text{Pd}(\text{PhCN})_2\text{Cl}_2$  (9.2 mg, 0.024 mmol),  $\text{CuCl}_2 \cdot 2\text{H}_2\text{O}$  (3.6 mg, 0.024 mmol) and  $\text{AgNO}_2$  (1.8 mg, 0.012 mmol). After the addition of  $\text{CH}_3\text{NO}_2$  and  $t\text{-BuOH}$ , the resulting mixture was stirred at room temperature and sparged with  $\text{O}_2$  (balloon) for 3 minutes. Then **(R)-3ka** (63.0 mg, 0.2 mmol) was added and the mixture was allowed to stirred at room temperature and sparged with  $\text{O}_2$  (balloon) for another 3 minutes. The mixture was then stirred at room temperature for 36 h with a balloon of  $\text{O}_2$ . The resulting reaction mixture was diluted with water (4 mL) and extracted with dichloromethane (5 mL x 3). The organic phase was dried over anhydrous  $\text{Na}_2\text{SO}_4$ , then filtered and concentrated in *vacuo*. The residue was purified by column chromatography on silica gel to afford **(R)-6** (41.8 mg, 63% yield) as a yellow oil (eluent: petroleum ether/ethyl acetate = 15/1): 93% ee (HPLC conditions: AD-H column, hexane/*i*-PrOH = 95/5, 1.0 mL/min,  $\lambda = 214$  nm,  $t_R$  (major) = 12.9 min,  $t_R$  (minor) = 12.2 min;  $[\alpha]_D^{20} = -149.7$  ( $c = 0.76$ ,  $\text{CHCl}_3$ );  **$^1\text{H NMR}$**  (400 MHz,  $\text{CDCl}_3$ )  $\delta = 9.69$  (t,  $J = 1.8$  Hz, 1 H, CHO), 7.53 (d,  $J = 8.8$  Hz, 2 H, Ar-H), 7.48-7.38 (m, 3 H, Ar-H), 7.30-7.20 (m, 4 H, Ar-H), 3.08 (dd,  $J_1 = 16.2$  Hz,  $J_2 = 1.8$  Hz, 1 H, one proton of  $\text{CH}_2$ ), 2.79 (dd,  $J_1 = 16.2$  Hz,  $J_2 = 1.8$  Hz, 1 H, one proton of  $\text{CH}_2$ ), 1.82 (s, 3 H,  $\text{CH}_3$ );  **$^{13}\text{C NMR}$**  (100 MHz,  $\text{CDCl}_3$ )  $\delta = 201.5, 200.3, 141.4, 135.3, 132.5, 132.3, 129.6, 128.2, 127.8, 121.7, 54.4, 53.2, 23.4$ ; **IR** (neat):  $\nu = 3061, 2990, 2934, 2839, 2739, 1717, 1672, 1596, 1578, 1488, 1459, 1446, 1397, 1258, 1236, 1182, 1147, 1083, 1036, 1008$   $\text{cm}^{-1}$ ; **MS** (ESI)  $m/z$  (%): 333  $[\text{M}(\text{}^{81}\text{Br})+\text{H}]^+$ , 331  $[\text{M}(\text{}^{79}\text{Br})+\text{H}]^+$ ; **HRMS** Calcd  $m/z$  for  $\text{C}_{17}\text{H}_{16}^{79}\text{BrO}_2(\text{M}+\text{H})^+$ : 331.0328; Found: 331.0312.

**(7) Synthesis of 2-(4-bromophenyl)-2-methyl-1-phenylbutan-1-one (7) via Pd/C reduction of 3ka (Yy-4-107)**

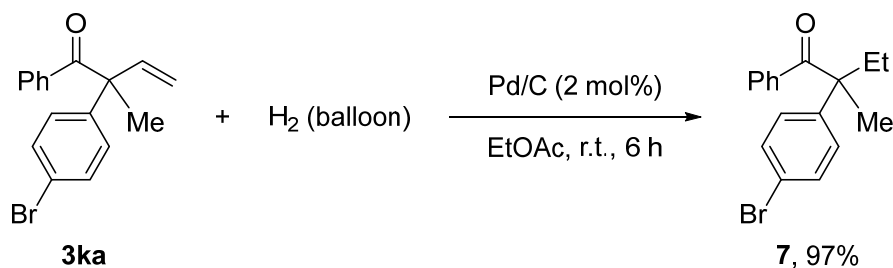

To a Schlenk tube fulfilled with argon were added Pd/C (8.5 mg, 0.004 mmol) and **3ka** (63.0 mg, 0.2 mmol) sequentially. After addition of these chemicals, the tube was degassed and refilled with H<sub>2</sub> by a balloon of H<sub>2</sub>. Then EtOAc (2 mL) was added and the resulting mixture was stirred at room temperature for 6 h. The H<sub>2</sub> balloon was removed and the resulting mixture was filtered through a short column of silica gel (2 cm), eluted with ethyl acetate (5 mL x 3), and concentrated. The residue was purified by column chromatography on silica gel to afford **7** (61.6 mg, 97% yield) as a colorless oil (eluent: petroleum ether/ethyl acetate = 100/1); <sup>1</sup>H NMR (400 MHz, CDCl<sub>3</sub>) δ = 7.54-7.42 (m, 4 H, Ar-H), 7.40-7.34 (m, 1 H, Ar-H), 7.26-7.20 (m, 2 H, Ar-H), 7.19-7.10 (m, 2 H, Ar-H), 2.40-1.96 (m, 2 H, CH<sub>2</sub>), 1.53 (s, 3 H, CH<sub>3</sub>), 0.74 (t, *J* = 7.4 Hz, 3 H, CH<sub>3</sub>); <sup>13</sup>C NMR (100 MHz, CDCl<sub>3</sub>) δ = 203.1, 143.5, 136.6, 132.0, 131.7, 129.3, 128.03, 127.99, 120.8, 54.6, 32.1, 23.6, 8.5; IR (neat): ν = 3065, 2970, 2937, 2879, 1676, 1596, 1488, 1455, 1446, 1397, 1384, 1232, 1182, 1152, 1107, 1089, 1075, 1006 cm<sup>-1</sup>; MS (ESI) *m/z* (%): 319 [M(<sup>81</sup>Br)+H]<sup>+</sup>, 317 [M(<sup>79</sup>Br)+H]<sup>+</sup>; HRMS Calcd *m/z* for C<sub>17</sub>H<sub>18</sub><sup>79</sup>BrO(M+H)<sup>+</sup>: 317.0536; Found: 317.0539.

**(8) Synthesis of (*R*)-2-(4-bromophenyl)-2-methyl-1-phenylbutan-1-one [(*R*)-7] via Pd/C reduction of (*R*)-3ka (Yy-4-106)**

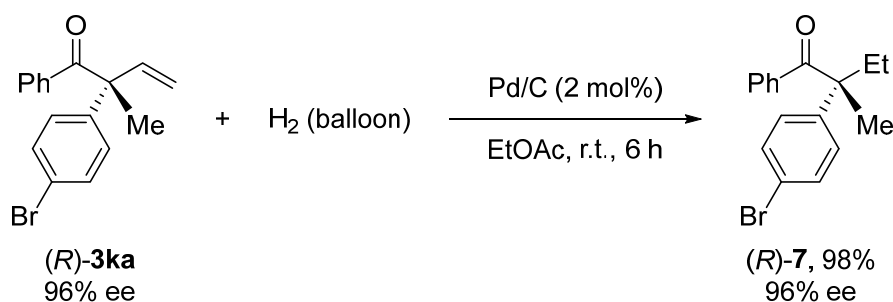

To a Schlenk tube fulfilled with argon were added Pd/C (8.5 mg, 0.004 mmol) and (*R*)-**3ka** (63.2 mg, 0.2 mmol) sequentially. After addition of these chemicals, the

tube was degassed and refilled with H<sub>2</sub> by a balloon of H<sub>2</sub>. Then EtOAc (2 mL) was added and the resulting mixture was stirred at room temperature for 6 h. After that, the H<sub>2</sub> balloon was removed and the resulting mixture was filtered through a short column of silica gel (2 cm) eluted with ethyl acetate (5 mL x 3), and concentrated. The residue was purified by column chromatography on silica gel to afford (*R*)-**7** (62.2 mg, 98% yield) as a colorless oil (eluent: petroleum ether/ethyl acetate = 100/1): 96% ee (HPLC conditions: AD-H column, hexane/*i*-PrOH = 99/1, 0.7 mL/min,  $\lambda$  = 214 nm,  $t_R$  (major) = 15.7 min,  $t_R$  (minor) = 14.0 min;  $[\alpha]_D^{27} = -40.0$  (c = 1.10, CHCl<sub>3</sub>); **<sup>1</sup>H NMR** (400 MHz, CDCl<sub>3</sub>)  $\delta$  = 7.56-7.42 (m, 4 H, Ar-H), 7.37 (t,  $J$  = 7.4 Hz, 1 H, Ar-H), 7.26-7.19 (m, 2 H, Ar-H), 7.17 (d,  $J$  = 8.4 Hz, 2 H, Ar-H), 2.40-1.95 (m, 2 H, CH<sub>2</sub>), 1.53 (s, 3 H, CH<sub>3</sub>), 0.74 (t,  $J$  = 7.4 Hz, 3 H, CH<sub>3</sub>); **<sup>13</sup>C NMR** (100 MHz, CDCl<sub>3</sub>)  $\delta$  = 203.1, 143.5, 136.6, 132.0, 131.7, 129.3, 128.02, 127.99, 120.7, 54.6, 32.1, 23.6, 8.5; **IR** (neat):  $\nu$  = 3065, 2970, 2936, 2879, 1676, 1596, 1488, 1455, 1446, 1397, 1384, 1232, 1152, 1107, 1089, 1075, 1006 cm<sup>-1</sup>; **MS** (ESI)  $m/z$  (%): 319 [M(<sup>81</sup>Br)+H]<sup>+</sup>, 317 [M(<sup>79</sup>Br)+H]<sup>+</sup>; **HRMS** Calcd  $m/z$  for C<sub>17</sub>H<sub>18</sub><sup>79</sup>BrO(M+H)<sup>+</sup>: 317.0536; Found: 317.0539.

## Computational Method.

All calculations were performed with the Gaussian 09 program.<sup>12</sup> Geometries have been fully optimized with the density functional theory of B3LYP method.<sup>13</sup> The standard 6-31G(d)<sup>14</sup> basis set was used for carbon, hydrogen and oxygen atoms and LANL2DZ basis set<sup>15</sup> with effective core potential (ECP) for copper. Harmonic vibration frequency calculations were carried out for all the stationary points to confirm each structure being either a minimum (no imaginary frequency) or a transition structure (one imaginary frequency). Intrinsic reaction coordinate (IRC)<sup>16</sup> calculations were performed to confirm the connection of the transition structures with their corresponding reactants and products. The single point energies and solvent effects in THF ( $\epsilon = 7.43$ ) were computed with M06/SDD<sup>17</sup>-6-311+G(d,p) basis sets by using SMD<sup>18</sup> solvation model. The reported relative energies are the Gibbs free energies ( $\Delta G_{\text{sol}}$ ) in THF unless otherwise specified.

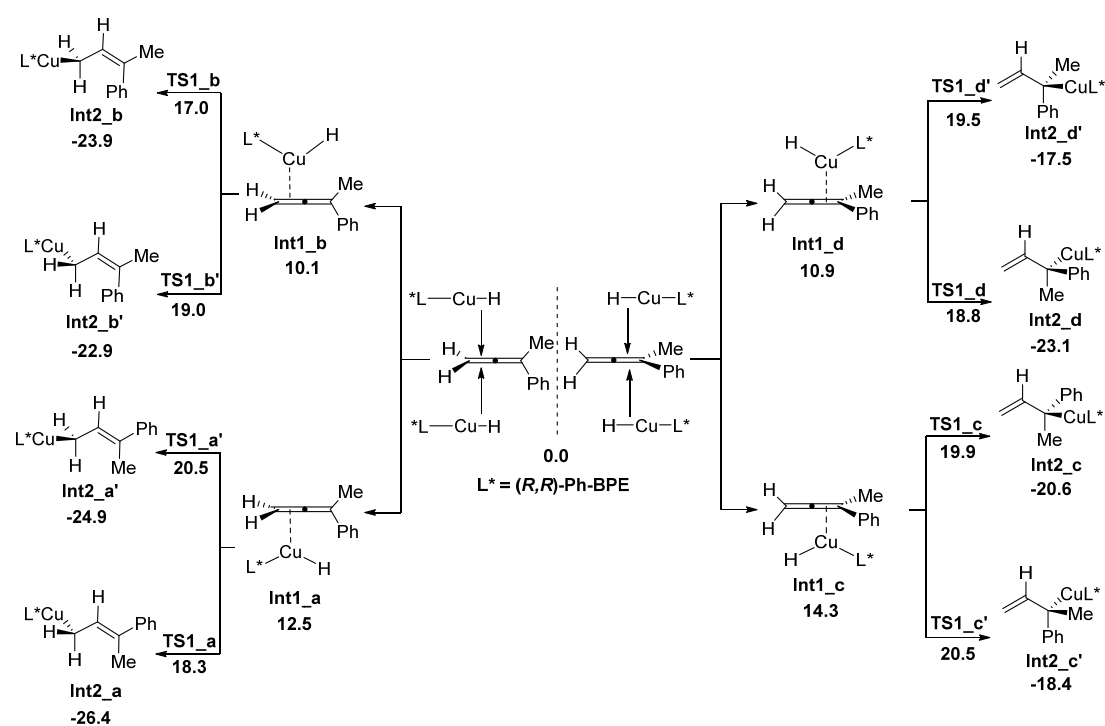

**Figure S1** Eight transition structures associated with the hydrocupration step. All energies are in kcal/mol with respect of CuH and allene (**1d**).



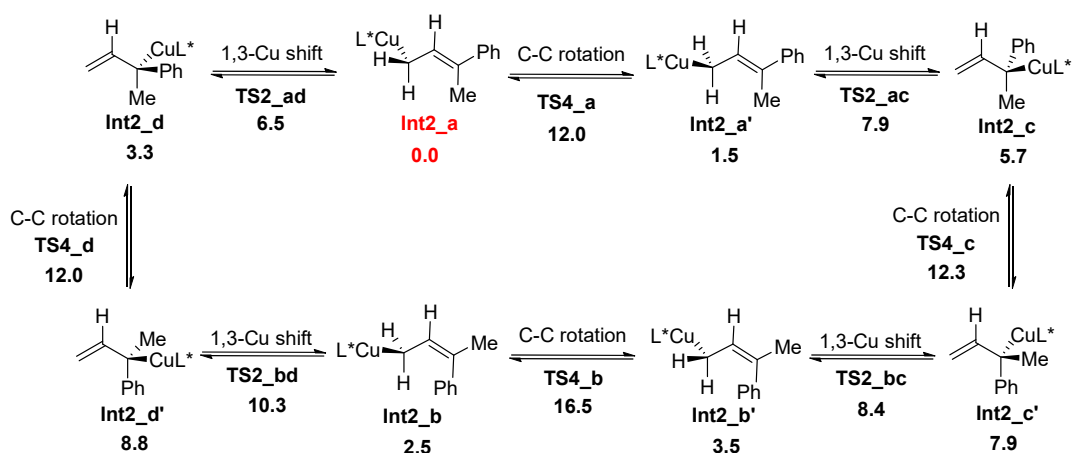

**Figure S2** Facial isomerization of **Int2\_a-d**. All energies are given in kcal/mol with respect of **Int2\_a**.

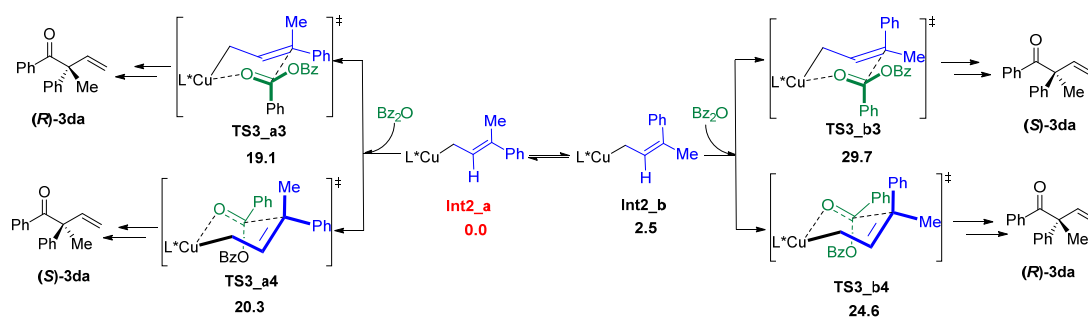

**Figure S3** Less favored transition states with *Si*-face **2a** participation. All energies are given in kcal/mol with respect of **Int2\_a**.

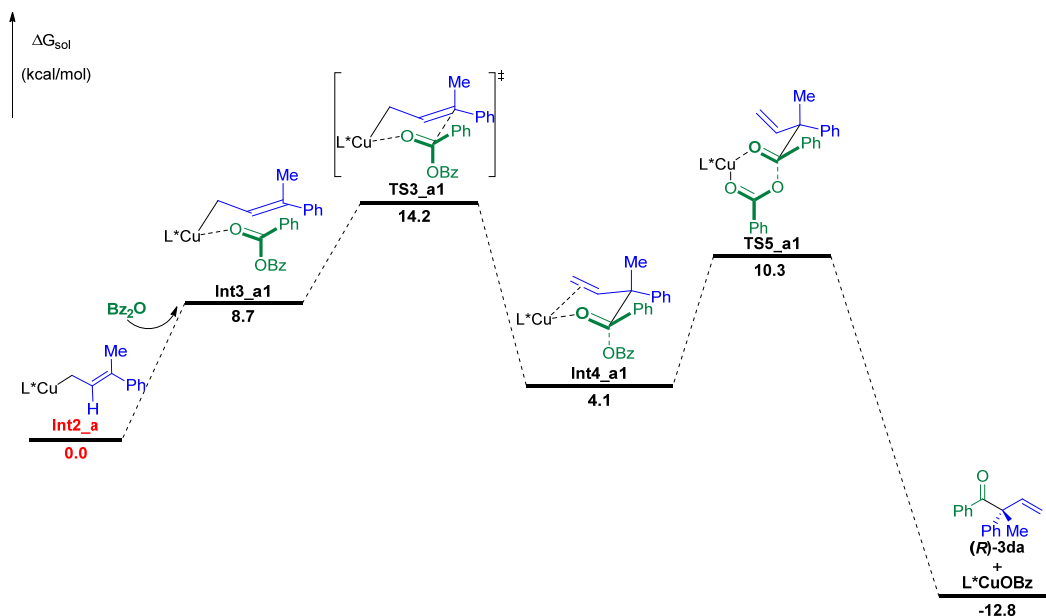

**Figure S4**. Energy profile for the hydroacylation process from **Int2\_a**. Free energies are given in kcal/mol.

**Table S1.** Bond length variation from **Int3\_a1** to **Int4\_a1** via **TS3\_a1**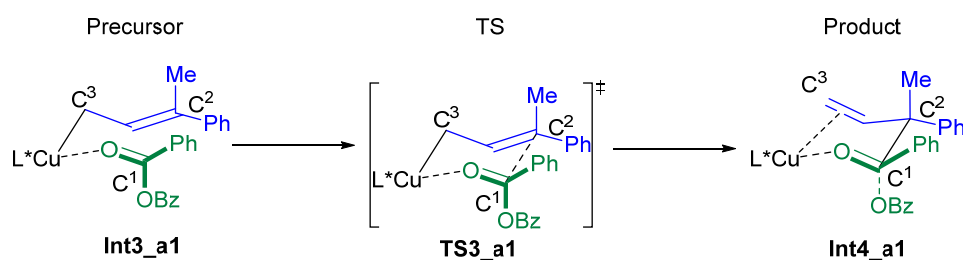

|                                | <b>Int3_a1</b> | $\delta 1^c$ | <b>TS3_a1</b> | $\delta 2^d$ | <b>Int4_a1</b> |
|--------------------------------|----------------|--------------|---------------|--------------|----------------|
| C <sup>1</sup> -C <sup>2</sup> | 3.589          | 1.324        | 2.265         | 0.635        | 1.630          |
| Cu-C <sup>3</sup>              | 2.031          | 0.208        | 2.239         | 0.183        | 2.422          |

<sup>a</sup> Calculated at M06/6-311+G(d,p)/SDD/SMD(THF)//B3LYP/6-31G(d)/LANL2DZ level.

<sup>b</sup> Bond lengths are given in angstroms.

<sup>c</sup> Bond length changes between precursor and TS.

<sup>d</sup> Bond length changes between TS and product.

We reasoned that **TS3** is a late transition state from geometry analysis of the bond length variations from **Int3** to **Int4** via **TS3**. Take the most favorable **TS3\_a1** for example, the bond length variations between **TS3\_a1** and **Int4\_a1** are obviously smaller than that between **Int3\_a1** and **TS3\_a1**, indicating **TS3\_a1** most resembles product **Int4\_a1** and therefore should be a late transition state (Table S1).

**Table S2.** Comparative energetic results of TS3s

| Int2_a                                                       | Int2_b | Re-face participation of 2a |        |        |        | Si-face participation of 2a |        |        |        |
|--------------------------------------------------------------|--------|-----------------------------|--------|--------|--------|-----------------------------|--------|--------|--------|
|                                                              |        | TS3_a1                      | TS3_a2 | TS3_b1 | TS3_b2 | TS3_a3                      | TS3_a4 | TS3_b3 | TS3_b4 |
| M06/6-311+G(d,p)/SDD/SMD(THF)//B3LYP/6-31G(d)/LANL2DZ        |        |                             |        |        |        |                             |        |        |        |
| 0.0                                                          | 2.5    | 14.2                        | 20.4   | 17.3   | 24.6   | 19.1                        | 20.3   | 29.7   | 24.6   |
| M06/6-311+G(d,p)/SDD/SMD(THF)//B3LYP-D3(BJ)/6-31G(d)/LANL2DZ |        |                             |        |        |        |                             |        |        |        |
| 0.0                                                          | 1.4    | 15.1                        | 21.0   | 17.6   | 26.6   | 16.5                        | 19.5   | 31.1   | 23.5   |
| M06/6-311+G(d,p)/SDD/SMD(THF)//M06/6-31G(d)/LANL2DZ          |        |                             |        |        |        |                             |        |        |        |
| 0.0                                                          | 2.8    | 15.0                        | 20.0   | 19.3   | 25.7   | 19.5                        | 21.1   | 33.8   | 24.6   |
| M06/6-311+G(d,p)/SDD/SMD(THF)//wB97X-D/6-31G(d)/LANL2DZ      |        |                             |        |        |        |                             |        |        |        |
| 0.0                                                          | 0.5    | 13.2                        | 20.2   | 15.7   | 25.1   | 15.7                        | 18.0   | 30.3   | 20.8   |

Considering dispersion corrections are not involved in the geometry optimization utilizing B3LYP method, extra geometry optimizations of the eight competing TS3s with methods including dispersion corrections, such as B3LYP-D3(BJ), M06 and wB97X-D were conducted. Single point calculations on the obtained geometries have been performed including solvent effect (THF) at the same level with larger basis set. The comparisons of the energetic results are listed in Table S2. It is obvious that these results reproduce the trend observed with B3LYP optimizations. Careful examinations on the geometries didn't show significant changes from the B3LYP structures.

## Energies of intermediates and transition states

**Table S2.** Electronic energies ( $E_{elec}$ ), Gibbs free energies ( $G_{298}$ ), thermal correction to Gibbs free energy ( $cor G_{gas}$ ), solvation energies ( $E_{sol}$ ), solvation free energies ( $G_{sol}$ ) in THF ( $\epsilon = 7.43$ ) for all stationary points of the process. Calculations were carried out at M06/6-311+G(d,p)/SDD/SMD(THF)//B3LYP/6-31G(d)/LANL-2DZ level.

| species        | $E_{elec}$<br>(a.u.) | $G_{298}$<br>(a.u.) | $cor G_{gas}$<br>(a.u.) | $E_{sol}$<br>(a.u.) | $G_{sol}$<br>(a.u.) |
|----------------|----------------------|---------------------|-------------------------|---------------------|---------------------|
| <b>1d</b>      | -387.033394          | -386.901312         | 0.132081                | -386.820688         | -386.688607         |
| <b>L*CuH</b>   | -2196.754939         | -2196.210189        | 0.544751                | -2197.342444        | -2196.797693        |
| <b>Int1_a</b>  | -2583.773815         | -2583.074160        | 0.699655                | -2584.165995        | -2583.466340        |
| <b>Int1_b</b>  | -2583.779618         | -2583.079270        | 0.700348                | -2584.170630        | -2583.470282        |
| <b>Int1_c</b>  | -2583.769501         | -2583.069137        | 0.700364                | -2584.163879        | -2583.463515        |
| <b>Int1_d</b>  | -2583.774133         | -2583.073792        | 0.700342                | -2584.169342        | -2583.469000        |
| <b>TS1_a</b>   | -2583.761067         | -2583.060890        | 0.700176                | -2584.157244        | -2583.457068        |
| <b>TS1_a'</b>  | -2583.759451         | -2583.058860        | 0.700590                | -2584.154289        | -2583.453699        |
| <b>TS1_b</b>   | -2583.764467         | -2583.064657        | 0.699810                | -2584.159046        | -2583.459236        |
| <b>TS1_b'</b>  | -2583.762268         | -2583.062970        | 0.699299                | -2584.155397        | -2583.456098        |
| <b>TS1_c</b>   | -2583.758996         | -2583.057299        | 0.701697                | -2584.156250        | -2583.454553        |
| <b>TS1_c'</b>  | -2583.758773         | -2583.057786        | 0.700987                | -2584.154640        | -2583.453653        |
| <b>TS1_d</b>   | -2583.762960         | -2583.060456        | 0.702504                | -2584.158798        | -2583.456294        |
| <b>TS1_d'</b>  | -2583.759582         | -2583.058916        | 0.700666                | -2584.155842        | -2583.455176        |
| <b>Int2_a</b>  | -2583.841747         | -2583.138116        | 0.703631                | -2584.231965        | -2583.528334        |
| <b>Int2_a'</b> | -2583.840829         | -2583.136119        | 0.704710                | -2584.230703        | -2583.525993        |
| <b>Int2_b</b>  | -2583.839595         | -2583.134383        | 0.705212                | -2584.229580        | -2583.524368        |
| <b>Int2_b'</b> | -2583.839975         | -2583.133319        | 0.706656                | -2584.229420        | -2583.522764        |
| <b>Int2_c</b>  | -2583.830174         | -2583.122548        | 0.707626                | -2584.226816        | -2583.519190        |
| <b>Int2_c'</b> | -2583.828112         | -2583.120604        | 0.707509                | -2584.223194        | -2583.515685        |
| <b>Int2_d</b>  | -2583.830233         | -2583.125963        | 0.704270                | -2584.227326        | -2583.523056        |
| <b>Int2_d'</b> | -2583.825285         | -2583.117258        | 0.708028                | -2584.222275        | -2583.514247        |
| <b>TS2_ac</b>  | -2583.828388         | -2583.118607        | 0.709781                | -2584.225563        | -2583.515782        |
| <b>TS2_ad</b>  | -2583.829223         | -2583.121102        | 0.708120                | -2584.226099        | -2583.517979        |
| <b>TS2_bc</b>  | -2583.825319         | -2583.115359        | 0.709961                | -2584.224889        | -2583.514928        |
| <b>TS2_bd</b>  | -2583.822733         | -2583.112803        | 0.709930                | -2584.221810        | -2583.511880        |
| <b>TS4_a</b>   | -2583.826658         | -2583.121014        | 0.705644                | -2584.214787        | -2583.509143        |
| <b>TS4_b</b>   | -2583.822033         | -2583.116784        | 0.705249                | -2584.207312        | -2583.502063        |
| <b>TS4_c</b>   | -2583.818952         | -2583.110732        | 0.708220                | -2584.216964        | -2583.508744        |
| <b>TS4_d</b>   | -2583.821496         | -2583.113395        | 0.708102                | -2584.217254        | -2583.509152        |
| <b>2a</b>      | -765.208202          | -765.045084         | 0.163118                | -764.904973         | -764.741855         |
| <b>Int3_a1</b> | -3349.045610         | -3348.154164        | 0.891446                | -3349.147790        | -3348.256344        |
| <b>Int3_a2</b> | -3349.044361         | -3348.156732        | 0.887629                | -3349.145227        | -3348.257598        |

|                |              |              |          |              |              |
|----------------|--------------|--------------|----------|--------------|--------------|
| <b>Int3_a3</b> | -3349.039747 | -3348.150329 | 0.889418 | -3349.143943 | -3348.254525 |
| <b>Int3_a4</b> | -3349.044494 | -3348.155452 | 0.889042 | -3349.144039 | -3348.254997 |
| <b>Int3_b1</b> | -3349.040258 | -3348.144764 | 0.895493 | -3349.142637 | -3348.247144 |
| <b>Int3_b2</b> | -3349.041053 | -3348.147838 | 0.893215 | -3349.142857 | -3348.249642 |
| <b>Int3_b3</b> | -3349.039085 | -3348.148034 | 0.891052 | -3349.144503 | -3348.253451 |
| <b>Int3_b4</b> | -3349.040896 | -3348.148160 | 0.892736 | -3349.144395 | -3348.251659 |
| <b>TS3_a1</b>  | -3349.035358 | -3348.139191 | 0.896168 | -3349.143749 | -3348.247581 |
| <b>TS3_a2</b>  | -3349.025491 | -3348.129152 | 0.896338 | -3349.133965 | -3348.237627 |
| <b>TS3_a3</b>  | -3349.029722 | -3348.130879 | 0.898843 | -3349.138641 | -3348.239798 |
| <b>TS3_a4</b>  | -3349.028859 | -3348.130425 | 0.898433 | -3349.136226 | -3348.237793 |
| <b>TS3_b1</b>  | -3349.032264 | -3348.132420 | 0.899844 | -3349.142440 | -3348.242596 |
| <b>TS3_b2</b>  | -3349.020914 | -3348.123592 | 0.897322 | -3349.128250 | -3348.230928 |
| <b>TS3_b3</b>  | -3349.013470 | -3348.115263 | 0.898207 | -3349.121112 | -3348.222905 |
| <b>TS3_b4</b>  | -3349.022878 | -3348.122187 | 0.900691 | -3349.131610 | -3348.230919 |
| <b>Int4_a1</b> | -3349.049053 | -3348.149066 | 0.899987 | -3349.163669 | -3348.263682 |
| <b>Int4_a2</b> | -3349.041514 | -3348.140970 | 0.900544 | -3349.154371 | -3348.253827 |
| <b>Int4_b1</b> | -3349.045127 | -3348.145124 | 0.900004 | -3349.159806 | -3348.259802 |
| <b>Int4_b2</b> | -3349.041341 | -3348.139179 | 0.902162 | -3349.155404 | -3348.253242 |
| <b>TS5_a1</b>  | -3349.049428 | -3348.152366 | 0.897061 | -3349.150799 | -3348.253738 |
| <b>(R)-3da</b> | -732.637375  | -732.399463  | 0.237913 | -732.285008  | -732.047095  |
| <b>(S)-3da</b> | -732.638313  | -732.400772  | 0.237541 | -732.285309  | -732.047768  |
| <b>L*CuOBz</b> | -2616.444497 | -2615.811065 | 0.633432 | -2616.877001 | -2616.243569 |

## Cartesian coordinates for the optimized structures in Table S2

### 1d

|   |             |             |             |
|---|-------------|-------------|-------------|
| C | 1.93008400  | -1.47135900 | -0.00004600 |
| C | 0.57139400  | -1.17613800 | -0.00004100 |
| C | 0.11762000  | 0.15638700  | 0.00001400  |
| C | 1.08046400  | 1.17884700  | 0.00005900  |
| C | 2.44491000  | 0.88170800  | 0.00005200  |
| C | 2.87772300  | -0.44276000 | 0.00000300  |
| H | 2.25311100  | -2.50931900 | -0.00008700 |
| H | -0.15720200 | -1.98174200 | -0.00008000 |
| H | 0.76984100  | 2.21842300  | 0.00009500  |
| H | 3.16853300  | 1.69285400  | 0.00008700  |
| H | 3.93941200  | -0.67422500 | 0.00000000  |
| C | -1.33683200 | 0.47480000  | 0.00000000  |
| C | -1.77886100 | 1.92797900  | -0.00005400 |
| H | -1.40153900 | 2.45622500  | 0.88451200  |
| H | -1.40134300 | 2.45621000  | -0.88454500 |
| H | -2.86888400 | 1.99867500  | -0.00017500 |
| C | -2.25465500 | -0.47172500 | -0.00014200 |
| C | -3.17532900 | -1.39848200 | 0.00011400  |
| H | -3.58061600 | -1.80646300 | -0.92581100 |
| H | -3.58042000 | -1.80618300 | 0.92624800  |

### L\*CuH

|    |             |             |             |
|----|-------------|-------------|-------------|
| C  | 0.64507000  | -0.42298500 | -1.56249100 |
| C  | -0.64536300 | 0.42242500  | -1.56242400 |
| H  | 1.51647200  | 0.23368300  | -1.67027400 |
| H  | 0.64309700  | -1.10699800 | -2.42007800 |
| H  | -1.51679500 | -0.23428000 | -1.66977300 |
| H  | -0.64365600 | 1.10620600  | -2.42019800 |
| P  | -0.93449200 | 1.34935400  | 0.04432900  |
| P  | 0.93445400  | -1.34941500 | 0.04448400  |
| Cu | 0.00000200  | 0.00022600  | 1.84157700  |
| C  | -2.70501100 | 1.98953600  | -0.19220600 |
| H  | -2.94680500 | 1.83302600  | -1.25215800 |
| C  | -0.15740100 | 3.08085300  | -0.16609600 |
| H  | 0.05977700  | 3.37102300  | 0.86961900  |
| C  | 0.15772800  | -3.08111500 | -0.16561900 |
| H  | -0.05926300 | -3.37124300 | 0.87015200  |
| C  | 2.70513300  | -1.98933400 | -0.19183400 |

|   |             |             |             |
|---|-------------|-------------|-------------|
| H | 2.94698600  | -1.83290300 | -1.25178500 |
| C | -2.58355500 | 3.51749600  | 0.03473000  |
| C | -1.30286300 | 3.98326000  | -0.66854500 |
| H | -3.47521100 | 4.03320100  | -0.34105700 |
| H | -2.52141800 | 3.72669300  | 1.11058800  |
| H | -1.08297100 | 5.04006000  | -0.47277900 |
| H | -1.43456900 | 3.87838800  | -1.75273100 |
| C | -3.77015700 | 1.30649800  | 0.64154400  |
| C | -4.97166700 | 0.90620600  | 0.03928500  |
| C | -3.60939600 | 1.08870000  | 2.01939200  |
| C | -5.98921200 | 0.31006200  | 0.78756000  |
| H | -5.11267000 | 1.06508300  | -1.02799400 |
| C | -4.62383800 | 0.49106200  | 2.76821300  |
| H | -2.67648800 | 1.35690900  | 2.50826800  |
| C | -5.81788400 | 0.10067800  | 2.15704900  |
| H | -6.91378300 | 0.01144800  | 0.29967500  |
| H | -4.47331500 | 0.32343500  | 3.83124800  |
| H | -6.60586500 | -0.36556400 | 2.74259500  |
| C | 1.15208000  | 3.08727800  | -0.92434600 |
| C | 1.24060100  | 3.36375500  | -2.29687800 |
| C | 2.33657000  | 2.76709400  | -0.23749300 |
| C | 2.46983300  | 3.31685300  | -2.96031900 |
| H | 0.35074900  | 3.62977000  | -2.85966600 |
| C | 3.56318300  | 2.71154900  | -0.89837000 |
| H | 2.29214800  | 2.55251700  | 0.82821300  |
| C | 3.63449700  | 2.98711500  | -2.26667400 |
| H | 2.51349300  | 3.54241700  | -4.02287800 |
| H | 4.45930700  | 2.44897000  | -0.34335000 |
| H | 4.58907700  | 2.95077400  | -2.78471700 |
| C | 2.58392200  | -3.51728800 | 0.03521900  |
| C | 1.30333100  | -3.98330200 | -0.66808700 |
| H | 3.47567500  | -4.03288300 | -0.34049100 |
| H | 2.52175200  | -3.72643200 | 1.11108500  |
| H | 1.43505100  | -3.87835400 | -1.75226600 |
| H | 1.08365900  | -5.04015700 | -0.47236400 |
| C | 3.77006200  | -1.30597500 | 0.64191900  |
| C | 3.60913800  | -1.08806900 | 2.01973600  |
| C | 4.97152500  | -0.90547000 | 0.03971600  |
| C | 4.62338300  | -0.49011700 | 2.76856800  |
| H | 2.67623800  | -1.35638400 | 2.50856500  |
| C | 5.98888100  | -0.30902000 | 0.78801100  |
| H | 5.11265500  | -1.06442900 | -1.02753500 |
| C | 5.81739500  | -0.09953200 | 2.15746100  |
| H | 4.47273000  | -0.32239500 | 3.83156900  |

|   |             |             |             |
|---|-------------|-------------|-------------|
| H | 6.91342700  | -0.01026200 | 0.30016600  |
| H | 6.60522200  | 0.36694600  | 2.74302700  |
| C | -1.15186100 | -3.08784900 | -0.92369200 |
| C | -1.24063200 | -3.36520900 | -2.29601900 |
| C | -2.33621500 | -2.76710800 | -0.23684700 |
| C | -2.46997300 | -3.31858900 | -2.95929800 |
| H | -0.35091200 | -3.63171200 | -2.85878200 |
| C | -3.56292300 | -2.71186000 | -0.89755800 |
| H | -2.29159300 | -2.55186900 | 0.82872000  |
| C | -3.63448300 | -2.98827900 | -2.26568600 |
| H | -2.51382200 | -3.54483000 | -4.02170600 |
| H | -4.45894000 | -2.44885300 | -0.34256500 |
| H | -4.58914400 | -2.95215800 | -2.78359500 |
| H | 0.00082400  | -0.00041500 | 3.41977900  |

### Int1\_a

|    |             |             |             |
|----|-------------|-------------|-------------|
| Cu | -0.62356600 | 0.37133300  | -0.74131000 |
| C  | -2.00200800 | 2.96636800  | -1.96781300 |
| C  | -1.04315400 | 2.04509800  | -1.95507100 |
| C  | 0.10205500  | 1.48390900  | -2.42933300 |
| H  | 1.08266100  | 1.80364500  | -2.08144200 |
| H  | 0.08533000  | 0.82909900  | -3.30106500 |
| C  | -3.22701200 | 2.97688700  | -1.12150100 |
| C  | -3.73362900 | 4.18751000  | -0.61689100 |
| C  | -3.94136400 | 1.79699500  | -0.85536100 |
| C  | -4.90138000 | 4.21634000  | 0.14628400  |
| H  | -3.20598200 | 5.11760100  | -0.80815900 |
| C  | -5.11482300 | 1.82798000  | -0.10323300 |
| H  | -3.56576600 | 0.85432500  | -1.23303900 |
| C  | -5.59965000 | 3.03529500  | 0.40426100  |
| H  | -5.26597500 | 5.16364800  | 0.53590100  |
| H  | -5.64915000 | 0.89999900  | 0.08416400  |
| H  | -6.51451600 | 3.05716800  | 0.99120500  |
| H  | -1.80255200 | 0.13820400  | 0.29010100  |
| C  | -1.85314800 | 4.11620600  | -2.96052800 |
| H  | -1.70980500 | 5.07453700  | -2.44488400 |
| H  | -0.99307900 | 3.95644700  | -3.61497800 |
| H  | -2.75551300 | 4.21533600  | -3.57672500 |
| C  | 0.93286500  | -2.14297200 | 0.91193400  |
| C  | 1.84719900  | -1.01248700 | 1.42056500  |
| H  | 2.76981500  | -0.97989900 | 0.82967300  |
| H  | 2.13333600  | -1.22238700 | 2.45845700  |
| H  | 0.05717400  | -2.22889800 | 1.56436200  |

|   |             |             |             |
|---|-------------|-------------|-------------|
| H | 1.46826700  | -3.09993100 | 0.95623400  |
| C | 1.50893300  | -2.72697200 | -1.96281200 |
| H | 1.26329400  | -2.31363600 | -2.95060800 |
| C | -0.99023400 | -3.32527800 | -0.93592600 |
| H | -0.90632800 | -3.85624500 | 0.02040100  |
| C | 2.55009800  | 1.80023100  | 1.78958200  |
| H | 3.27060900  | 1.16110600  | 2.31803700  |
| C | 0.13964200  | 1.00684700  | 2.90286300  |
| H | -0.70533700 | 1.61670700  | 2.56446100  |
| P | 0.24122000  | -1.86913600 | -0.80866300 |
| P | 1.08690800  | 0.69307900  | 1.26138000  |
| C | 1.06566500  | 1.89502800  | 3.76610100  |
| C | 1.91808800  | 2.75539500  | 2.82917600  |
| H | 0.47572700  | 2.50395500  | 4.46240500  |
| H | 1.73412800  | 1.27731300  | 4.37707800  |
| H | 2.69405900  | 3.31176100  | 3.36928000  |
| H | 1.28915500  | 3.49758900  | 2.32014600  |
| C | 1.10240000  | -4.21159100 | -1.96923800 |
| C | -0.42617400 | -4.24991400 | -2.04493900 |
| C | 2.95438300  | -2.39160000 | -1.67218700 |
| C | 3.47752800  | -1.16506000 | -2.11714800 |
| C | 3.80475800  | -3.24627500 | -0.95422900 |
| C | 4.79409300  | -0.79749000 | -1.84399700 |
| H | 2.83795800  | -0.48955100 | -2.68044800 |
| C | 5.12725000  | -2.88417600 | -0.68475000 |
| H | 3.44422400  | -4.20954600 | -0.60673000 |
| C | 5.62701800  | -1.65817100 | -1.12396500 |
| H | 5.16577500  | 0.16315900  | -2.18871100 |
| H | 5.76700600  | -3.56750600 | -0.13196100 |
| H | 6.65560300  | -1.37776900 | -0.91347600 |
| C | -2.44060400 | -2.94225600 | -1.13354600 |
| C | -3.39630900 | -3.27695000 | -0.16620800 |
| C | -2.87416300 | -2.27589100 | -2.28999500 |
| C | -4.74451800 | -2.95962600 | -0.34402500 |
| H | -3.08028300 | -3.78984100 | 0.73953600  |
| C | -4.21916000 | -1.95814600 | -2.47366200 |
| H | -2.15339600 | -1.99418000 | -3.05419400 |
| C | -5.16200800 | -2.29988300 | -1.50020100 |
| H | -5.46744800 | -3.23161800 | 0.42088000  |
| H | -4.53204000 | -1.44119500 | -3.37717300 |
| H | -6.21082000 | -2.05466100 | -1.64455500 |
| C | 3.26922500  | 2.49318000  | 0.65417100  |
| C | 2.59602000  | 3.36360500  | -0.22000400 |
| C | 4.64524200  | 2.30446600  | 0.46545200  |



|   |             |             |             |
|---|-------------|-------------|-------------|
| C | 3.27843300  | 4.02506400  | -1.24099900 |
| H | 1.52628400  | 3.51986800  | -0.10399600 |
| C | 5.33269900  | 2.96480300  | -0.55633600 |
| H | 5.18617300  | 1.63464300  | 1.13029300  |
| C | 4.65163400  | 3.82902600  | -1.41414700 |
| H | 2.73617800  | 4.69546500  | -1.90287700 |
| H | 6.40162600  | 2.80626200  | -0.67633900 |
| H | 5.18320100  | 4.34656900  | -2.20824500 |
| C | -0.43498000 | -0.21567500 | 3.59081100  |
| C | 0.29882600  | -0.98830600 | 4.50660700  |
| C | -1.75500000 | -0.60957500 | 3.30969500  |
| C | -0.26280000 | -2.11169800 | 5.11812400  |
| H | 1.31845400  | -0.71315500 | 4.76124900  |
| C | -2.31687100 | -1.73208700 | 3.91863200  |
| H | -2.32972000 | -0.04112100 | 2.58457700  |
| C | -1.57395200 | -2.48990100 | 4.82724200  |
| H | 0.32719700  | -2.68730200 | 5.82718000  |
| H | -3.34120900 | -2.01034700 | 3.68379400  |
| H | -2.01312200 | -3.36074100 | 5.30714200  |
| H | -0.82216600 | -5.26616700 | -1.93232200 |
| H | -0.75449600 | -3.89062200 | -3.02828100 |
| H | 1.57061200  | -4.74913600 | -2.80376800 |
| H | 1.42965400  | -4.70627400 | -1.04607000 |

### Int1\_b

|    |             |             |             |
|----|-------------|-------------|-------------|
| Cu | -0.19774700 | 0.96971700  | -0.02793700 |
| C  | -2.00131100 | 0.63137200  | 1.15821000  |
| C  | -2.22368300 | 1.60273400  | 0.24207800  |
| C  | -2.93134400 | 2.51264200  | -0.42379200 |
| C  | -4.37672800 | 2.71807600  | -0.08349900 |
| C  | -5.12592300 | 3.71311100  | -0.73846900 |
| C  | -5.04430700 | 1.93446600  | 0.87823300  |
| C  | -6.47548700 | 3.91766500  | -0.44502600 |
| H  | -4.65558800 | 4.33997000  | -1.48728900 |
| C  | -6.38991700 | 2.13777600  | 1.17074300  |
| H  | -4.49755600 | 1.15646500  | 1.40036700  |
| C  | -7.11749600 | 3.13246000  | 0.51076700  |
| H  | -7.02310800 | 4.69649900  | -0.96987700 |
| H  | -6.87397500 | 1.51520700  | 1.91934000  |
| H  | -8.16808200 | 3.29031000  | 0.73952800  |
| H  | -2.25845700 | -0.40703800 | 0.95642900  |
| H  | -1.73011300 | 0.88114100  | 2.18433400  |
| H  | 0.43979900  | 2.01041500  | -1.04735900 |

|   |             |             |             |
|---|-------------|-------------|-------------|
| C | 2.48755200  | -1.16583500 | 0.34507800  |
| C | 1.56552700  | -2.10358000 | -0.45671700 |
| P | 1.58930000  | 0.11414800  | 1.37930400  |
| P | 0.21830100  | -1.19852200 | -1.39634000 |
| C | 3.05514900  | 1.17136900  | 1.98677200  |
| H | 3.95473300  | 0.60552900  | 1.71027000  |
| C | 1.34590500  | -0.70189400 | 3.10116000  |
| H | 0.48578300  | -0.15520500 | 3.50926100  |
| C | 0.96263000  | -0.82962500 | -3.12385100 |
| H | 0.42733900  | 0.08147200  | -3.41612400 |
| C | -0.82582000 | -2.65588700 | -2.04982100 |
| H | -0.23264200 | -3.56788800 | -1.89982800 |
| C | -2.33798100 | 3.36244600  | -1.52558100 |
| H | -2.87551400 | 3.21281400  | -2.47154700 |
| H | -2.41030800 | 4.42949100  | -1.27713000 |
| H | -1.28690000 | 3.10494600  | -1.66240600 |
| C | -0.91054200 | -2.39628100 | -3.57319600 |
| C | 0.48802300  | -1.97909600 | -4.03772500 |
| C | 2.94467100  | 1.13435200  | 3.53018300  |
| C | 2.58216800  | -0.29887900 | 3.92895400  |
| C | 0.97429300  | -2.16779700 | 3.06221200  |
| C | -0.37266200 | -2.53062300 | 2.89035700  |
| C | 1.92163500  | -3.19875200 | 3.16410600  |
| C | -0.76007200 | -3.86757100 | 2.80736700  |
| H | -1.12529000 | -1.74987700 | 2.81636700  |
| C | 1.53682900  | -4.53966300 | 3.08908000  |
| H | 2.97098500  | -2.96364200 | 3.31356700  |
| C | 0.19635900  | -4.88111100 | 2.90612700  |
| H | -1.80805100 | -4.11409800 | 2.66154400  |
| H | 2.29036400  | -5.31819100 | 3.17728700  |
| H | -0.10088500 | -5.92469000 | 2.84767200  |
| C | 3.18389700  | 2.56245900  | 1.40656300  |
| C | 4.38262000  | 2.95274000  | 0.79358800  |
| C | 2.14996000  | 3.50509600  | 1.50331900  |
| C | 4.55026400  | 4.24699500  | 0.29645300  |
| H | 5.19579300  | 2.23490100  | 0.70749600  |
| C | 2.31422300  | 4.79903200  | 1.01178400  |
| H | 1.19976500  | 3.22191500  | 1.94761400  |
| C | 3.51541800  | 5.17638100  | 0.40690700  |
| H | 5.49028000  | 4.52765600  | -0.17211700 |
| H | 1.49684700  | 5.51073600  | 1.09134400  |
| H | 3.64076200  | 6.18471200  | 0.02134100  |
| C | 2.44329400  | -0.50412100 | -3.13432500 |
| C | 2.85535000  | 0.81197400  | -2.85750500 |

|   |             |             |             |
|---|-------------|-------------|-------------|
| C | 3.43459800  | -1.46448600 | -3.39150000 |
| C | 4.20789200  | 1.15150600  | -2.83201400 |
| H | 2.10341500  | 1.56215700  | -2.62602700 |
| C | 4.78982600  | -1.12335900 | -3.37353200 |
| H | 3.15927200  | -2.48959400 | -3.62121900 |
| C | 5.18349700  | 0.18507700  | -3.09225900 |
| H | 4.49567200  | 2.17438600  | -2.60408400 |
| H | 5.53666000  | -1.88507400 | -3.58391700 |
| H | 6.23771500  | 0.44977700  | -3.07989500 |
| C | -2.16407100 | -2.84071300 | -1.36783000 |
| C | -2.49264100 | -4.06744600 | -0.77396600 |
| C | -3.11985000 | -1.81163300 | -1.33259300 |
| C | -3.73534800 | -4.26619400 | -0.16677000 |
| H | -1.76730500 | -4.87809300 | -0.79085000 |
| C | -4.36126700 | -2.00486300 | -0.72586800 |
| H | -2.88628900 | -0.84294100 | -1.76758700 |
| C | -4.67484300 | -3.23485300 | -0.14044200 |
| H | -3.96818900 | -5.22905000 | 0.28138600  |
| H | -5.07944600 | -1.18935300 | -0.70439200 |
| H | -5.64243900 | -3.38604200 | 0.33065700  |
| H | -1.63039300 | -1.59206700 | -3.77401700 |
| H | -1.27367400 | -3.28802700 | -4.09843900 |
| H | 0.49989300  | -1.67082800 | -5.09066200 |
| H | 1.15590000  | -2.84489300 | -3.95270600 |
| H | 2.16224800  | 1.82879900  | 3.86383900  |
| H | 3.88292100  | 1.46825600  | 3.98885900  |
| H | 2.38267600  | -0.39463100 | 5.00362100  |
| H | 3.43181500  | -0.95471900 | 3.70204200  |
| H | 3.11487300  | -0.58767500 | -0.34232000 |
| H | 3.15957700  | -1.75826400 | 0.97822500  |
| H | 2.17338300  | -2.71734900 | -1.13316800 |
| H | 1.04465500  | -2.78729400 | 0.22372500  |

### Int1\_c

|    |             |             |             |
|----|-------------|-------------|-------------|
| Cu | -1.08114000 | -0.90354500 | -1.09256400 |
| C  | -1.50795600 | -2.03402000 | -3.84574500 |
| C  | -1.01302200 | -2.24565400 | -2.64066100 |
| C  | -0.39927400 | -3.00896600 | -1.68390100 |
| H  | -1.46908000 | -2.82165600 | -4.60177700 |
| H  | -1.97018400 | -1.09304000 | -4.12178000 |
| H  | -1.93813400 | 0.26518500  | -1.74456500 |
| P  | -1.29854500 | -0.47649900 | 1.24846200  |
| P  | 0.83208500  | 1.47851300  | -0.75960100 |

|   |             |             |             |
|---|-------------|-------------|-------------|
| C | -0.96296700 | 1.34609200  | 1.50983900  |
| C | 0.38405900  | 1.89670000  | 1.01166600  |
| C | -0.04969600 | 2.76229500  | -1.89758200 |
| H | -0.55664500 | 2.12004400  | -2.62261800 |
| C | 2.48160200  | 2.41299800  | -0.91462700 |
| H | 2.40792300  | 3.31976400  | -0.29710400 |
| C | -3.07808000 | -0.57373300 | 1.95291400  |
| H | -3.27368100 | 0.43948700  | 2.32589600  |
| C | -0.54978700 | -1.34109100 | 2.78359400  |
| H | -0.48992100 | -2.39386800 | 2.47382700  |
| C | -2.97892900 | -1.50815300 | 3.18199700  |
| C | -1.63707100 | -1.23928800 | 3.86816400  |
| C | 2.43954000  | 2.85337300  | -2.39426800 |
| C | 1.09056700  | 3.55522300  | -2.60745800 |
| C | -1.10803300 | 3.63488600  | -1.25242200 |
| C | -2.46878800 | 3.34489700  | -1.45133300 |
| C | -0.78743800 | 4.74405100  | -0.44991800 |
| C | -3.46696000 | 4.13312400  | -0.87590400 |
| H | -2.73726100 | 2.47795500  | -2.04813700 |
| C | -1.78382300 | 5.53270900  | 0.12876500  |
| H | 0.25347600  | 5.00630400  | -0.27758800 |
| C | -3.13049400 | 5.23202600  | -0.08222000 |
| H | -4.51140600 | 3.89015800  | -1.05635900 |
| H | -1.50468100 | 6.38601400  | 0.74208600  |
| H | -3.90703300 | 5.84915900  | 0.36221700  |
| C | 3.73349300  | 1.67175100  | -0.50714600 |
| C | 4.63185100  | 2.26068200  | 0.39544600  |
| C | 4.05931500  | 0.41321700  | -1.03679300 |
| C | 5.82291800  | 1.62490300  | 0.75120000  |
| H | 4.39609800  | 3.23450600  | 0.81971200  |
| C | 5.24925000  | -0.22443700 | -0.68531700 |
| H | 3.37158100  | -0.07980400 | -1.71800700 |
| C | 6.13893000  | 0.37870400  | 0.20802200  |
| H | 6.50400400  | 2.10655600  | 1.44856400  |
| H | 5.47407300  | -1.20072400 | -1.10560700 |
| H | 7.06731700  | -0.11829200 | 0.47775300  |
| C | -4.17077500 | -0.91315300 | 0.96120100  |
| C | -4.40738800 | -2.22645800 | 0.52847500  |
| C | -4.99621000 | 0.10346000  | 0.46034100  |
| C | -5.43131200 | -2.51261200 | -0.37534700 |
| H | -3.79043000 | -3.04023800 | 0.89911700  |
| C | -6.01952700 | -0.17714500 | -0.44539700 |
| H | -4.83133700 | 1.12972200  | 0.78088900  |
| C | -6.24246500 | -1.48840700 | -0.86751000 |

|   |             |             |             |
|---|-------------|-------------|-------------|
| H | -5.59750900 | -3.53916600 | -0.69210900 |
| H | -6.64492200 | 0.62993300  | -0.81807500 |
| H | -7.04128300 | -1.71125900 | -1.56959900 |
| C | 0.84882700  | -0.88665100 | 3.14047000  |
| C | 1.11692600  | -0.03154200 | 4.21922600  |
| C | 1.93018900  | -1.31634900 | 2.35183500  |
| C | 2.42144100  | 0.38881200  | 4.49395100  |
| H | 0.31094300  | 0.30958600  | 4.86151500  |
| C | 3.23018000  | -0.89103300 | 2.61833200  |
| H | 1.74755900  | -1.98101000 | 1.51034900  |
| C | 3.48158800  | -0.03283000 | 3.69224600  |
| H | 2.60386400  | 1.04928600  | 5.33804400  |
| H | 4.04397600  | -1.21750200 | 1.97821200  |
| H | 4.49414200  | 0.30314600  | 3.89701600  |
| C | 1.07782200  | -3.18020400 | -1.66232900 |
| C | 1.89143300  | -2.62746300 | -2.67257000 |
| C | 1.70178000  | -3.98260800 | -0.68772800 |
| C | 3.25935400  | -2.88011700 | -2.71268600 |
| H | 1.43142300  | -2.01460900 | -3.44148900 |
| C | 3.07547100  | -4.22858700 | -0.72520800 |
| H | 1.11078000  | -4.43662800 | 0.10099700  |
| C | 3.86292700  | -3.68481400 | -1.73982400 |
| H | 3.85753700  | -2.45620000 | -3.51562600 |
| H | 3.52605500  | -4.85871400 | 0.03746200  |
| H | 4.92890900  | -3.89219700 | -1.78030000 |
| C | -1.25551800 | -3.95702800 | -0.85280200 |
| H | -2.31369800 | -3.72178200 | -0.98212000 |
| H | -1.08974400 | -4.99401900 | -1.17920000 |
| H | -1.02565700 | -3.90991900 | 0.21750500  |
| H | -3.82924400 | -1.34430200 | 3.85462700  |
| H | -3.02220000 | -2.55801600 | 2.86788300  |
| H | -1.44524300 | -1.94099900 | 4.68978000  |
| H | -1.65362700 | -0.23275100 | 4.30443600  |
| H | 2.52923800  | 1.97233700  | -3.04384700 |
| H | 3.28235400  | 3.51307400  | -2.63516600 |
| H | 0.86164700  | 3.67631600  | -3.67293600 |
| H | 1.15340900  | 4.56561600  | -2.18930300 |
| H | -1.77969700 | 1.84952200  | 0.98009200  |
| H | -1.07685000 | 1.57898300  | 2.57688000  |
| H | 1.20554000  | 1.48826200  | 1.61136200  |
| H | 0.38388400  | 2.98300000  | 1.16260800  |

**Int1\_d**

|    |             |             |             |
|----|-------------|-------------|-------------|
| Cu | -0.63553900 | -0.23725100 | -1.39298300 |
| C  | -0.63938800 | -0.97514700 | -4.33161700 |
| C  | -0.38954200 | -1.39526100 | -3.10616500 |
| C  | 0.01012900  | -2.31651700 | -2.18001900 |
| C  | -0.95215900 | -3.30033800 | -1.61804400 |
| C  | -0.52340900 | -4.31837300 | -0.74392700 |
| C  | -2.31852600 | -3.27555600 | -1.97104200 |
| C  | -1.42108600 | -5.25960600 | -0.23457000 |
| H  | 0.52313900  | -4.38858800 | -0.46573300 |
| C  | -3.21100500 | -4.21343900 | -1.45971300 |
| H  | -2.66986100 | -2.50990600 | -2.65596200 |
| C  | -2.77078300 | -5.21162000 | -0.58306300 |
| H  | -1.05752500 | -6.03621000 | 0.43389500  |
| H  | -4.25724200 | -4.17008100 | -1.75237900 |
| H  | -3.46868400 | -5.94479400 | -0.18827300 |
| H  | -0.49175200 | -1.64433500 | -5.18238900 |
| H  | -0.99855100 | 0.02732600  | -4.53507000 |
| C  | 1.49586900  | -2.50971000 | -1.92021600 |
| H  | 1.74650500  | -2.50568600 | -0.85446000 |
| H  | 1.82629400  | -3.47295900 | -2.33593700 |
| H  | 2.07499200  | -1.71683300 | -2.39357600 |
| H  | -1.41369900 | 0.99409400  | -2.03039800 |
| P  | -0.98706800 | -0.29813400 | 0.98856900  |
| P  | 1.48641300  | 1.43477000  | -0.65381100 |
| C  | -0.21052100 | 1.26032500  | 1.66534500  |
| C  | 1.23267900  | 1.52847000  | 1.20237700  |
| C  | 1.03464500  | 3.17731400  | -1.34308500 |
| H  | 0.53872200  | 2.92319000  | -2.28575900 |
| C  | 3.36180900  | 1.80211900  | -0.76330200 |
| H  | 3.62919800  | 2.33968600  | 0.15715300  |
| C  | -2.74810200 | -0.17287100 | 1.69611200  |
| H  | -2.66231100 | 0.50954000  | 2.55325000  |
| C  | -0.51862400 | -1.74042400 | 2.17513300  |
| H  | -0.43522800 | -2.59343500 | 1.49262100  |
| C  | -3.00866500 | -1.58629900 | 2.26219000  |
| C  | -1.76360200 | -1.97752400 | 3.06411700  |
| C  | 3.44353200  | 2.80942300  | -1.92900100 |
| C  | 2.37956500  | 3.87722600  | -1.66110500 |
| C  | 0.05425200  | 3.99560200  | -0.52511700 |
| C  | -1.31687700 | 3.93570100  | -0.82841000 |
| C  | 0.45404400  | 4.81670800  | 0.54313800  |
| C  | -2.25064300 | 4.66842900  | -0.09501200 |
| H  | -1.64903200 | 3.27869600  | -1.62721900 |
| C  | -0.47883600 | 5.55311200  | 1.27681500  |

|   |              |              |              |
|---|--------------|--------------|--------------|
| H | 1. 50429800  | 4. 89642600  | 0. 80959300  |
| C | -1. 83640400 | 5. 48359100  | 0. 96106900  |
| H | -3. 30426000 | 4. 59499500  | -0. 35052200 |
| H | -0. 13991100 | 6. 18440400  | 2. 09467400  |
| H | -2. 56182000 | 6. 05986400  | 1. 52968400  |
| C | 4. 25780800  | 0. 58959200  | -0. 86906500 |
| C | 4. 98444100  | 0. 15592300  | 0. 25033200  |
| C | 4. 40729800  | -0. 12867100 | -2. 06680600 |
| C | 5. 83052600  | -0. 95258300 | 0. 18063700  |
| H | 4. 88960000  | 0. 69836700  | 1. 18841100  |
| C | 5. 25511700  | -1. 23431900 | -2. 14193600 |
| H | 3. 85853500  | 0. 17862800  | -2. 95279800 |
| C | 5. 97133700  | -1. 65283800 | -1. 01813700 |
| H | 6. 38741100  | -1. 26069700 | 1. 06211600  |
| H | 5. 35755700  | -1. 76889300 | -3. 08290500 |
| H | 6. 63437100  | -2. 51171600 | -1. 07874800 |
| C | -3. 82263700 | 0. 36851200  | 0. 78107500  |
| C | -4. 24651800 | -0. 32989200 | -0. 35903800 |
| C | -4. 44786500 | 1. 58563800  | 1. 08485600  |
| C | -5. 26783700 | 0. 17170200  | -1. 16425300 |
| H | -3. 76961400 | -1. 26814300 | -0. 62526800 |
| C | -5. 46898500 | 2. 09283600  | 0. 27837300  |
| H | -4. 13211300 | 2. 14249100  | 1. 96458200  |
| C | -5. 88416500 | 1. 38518100  | -0. 85003400 |
| H | -5. 57921100 | -0. 38405000 | -2. 04502000 |
| H | -5. 94248500 | 3. 03664600  | 0. 53739200  |
| H | -6. 67967300 | 1. 77476500  | -1. 47976900 |
| C | 0. 80098900  | -1. 60411400 | 2. 90242000  |
| C | 0. 94114400  | -0. 86692000 | 4. 09062100  |
| C | 1. 94827400  | -2. 22584000 | 2. 38289700  |
| C | 2. 17847600  | -0. 75017000 | 4. 72588100  |
| H | 0. 07727500  | -0. 38095400 | 4. 53480200  |
| C | 3. 18810400  | -2. 10943700 | 3. 01221400  |
| H | 1. 86476500  | -2. 81391600 | 1. 47232000  |
| C | 3. 30938900  | -1. 36840600 | 4. 18912200  |
| H | 2. 25633500  | -0. 17621100 | 5. 64576900  |
| H | 4. 05657400  | -2. 59903900 | 2. 58033200  |
| H | 4. 27159900  | -1. 27857900 | 4. 68604100  |
| H | -3. 91368800 | -1. 59032700 | 2. 88142500  |
| H | -3. 17363700 | -2. 29945200 | 1. 44492200  |
| H | -1. 71532000 | -1. 35699800 | 3. 96684400  |
| H | -1. 79841800 | -3. 02146600 | 3. 39838600  |
| H | 4. 44959500  | 3. 24017500  | -2. 00523600 |
| H | 3. 23755400  | 2. 30764800  | -2. 88325800 |

|   |             |            |             |
|---|-------------|------------|-------------|
| H | 2.26238000  | 4.56271100 | -2.50937900 |
| H | 2.70544500  | 4.48606600 | -0.81024700 |
| H | 1.90642800  | 0.77358500 | 1.62647200  |
| H | 1.55322700  | 2.50320700 | 1.59012400  |
| H | -0.86740900 | 2.06732200 | 1.32114100  |
| H | -0.24935900 | 1.25499500 | 2.76119800  |

**TS1\_a**

|    |             |             |             |
|----|-------------|-------------|-------------|
| Cu | -0.12225500 | 0.38240200  | -0.84028100 |
| C  | -0.29587100 | 3.30054800  | -2.26415300 |
| C  | 0.00294200  | 1.98879900  | -2.19940300 |
| C  | 0.91277000  | 1.06273700  | -2.66770800 |
| H  | 1.98020000  | 1.25376900  | -2.57398400 |
| H  | 0.61355000  | 0.25624500  | -3.33571400 |
| C  | -1.14313100 | 4.05616500  | -1.31960600 |
| C  | -1.82376200 | 5.21884700  | -1.73846700 |
| C  | -1.29861600 | 3.67195900  | 0.02768100  |
| C  | -2.63754700 | 5.94017700  | -0.86745000 |
| H  | -1.72960200 | 5.55776100  | -2.76481200 |
| C  | -2.11416400 | 4.39330300  | 0.89979800  |
| H  | -0.76518400 | 2.80016900  | 0.38244700  |
| C  | -2.79128400 | 5.53082500  | 0.45924500  |
| H  | -3.15503100 | 6.82596900  | -1.22792100 |
| H  | -2.21324800 | 4.06882700  | 1.93346100  |
| H  | -3.42173800 | 6.09615400  | 1.14070100  |
| H  | -1.44389600 | 1.27449800  | -1.17029400 |
| C  | 0.24610600  | 4.05980600  | -3.47014900 |
| H  | 0.76866200  | 4.97561600  | -3.16397800 |
| H  | 0.93984400  | 3.43473700  | -4.03523100 |
| H  | -0.55862500 | 4.36369300  | -4.15428000 |
| C  | -0.03003900 | -2.44637900 | 0.96773700  |
| C  | 1.05652700  | -1.59425700 | 1.64855000  |
| H  | 2.04098600  | -1.85745400 | 1.24505000  |
| H  | 1.07549000  | -1.80970500 | 2.72415900  |
| H  | -0.98638500 | -2.31507300 | 1.48687500  |
| H  | 0.23477500  | -3.50899000 | 1.03370800  |
| C  | 0.77758800  | -3.03869000 | -1.89687900 |
| H  | 0.88886300  | -2.42747200 | -2.80122200 |
| C  | -1.90004600 | -3.02387800 | -1.19182800 |
| H  | -1.95965600 | -3.74899700 | -0.36896300 |
| C  | 2.53483900  | 0.89332200  | 2.01582200  |
| H  | 3.02246300  | 0.02500000  | 2.47758500  |
| C  | -0.10135800 | 0.90484000  | 2.85785700  |



|   |             |             |             |
|---|-------------|-------------|-------------|
| H | -0.51407800 | 1.85380800  | 2.49218800  |
| P | -0.36860200 | -1.95924600 | -0.80875400 |
| P | 0.86854800  | 0.24859100  | 1.34862900  |
| C | 2.14830000  | 1.86858100  | 3.15561300  |
| C | 0.96797200  | 1.24709500  | 3.91121000  |
| C | -1.50262400 | -3.81105900 | -2.46432600 |
| C | -0.05528400 | -4.27908000 | -2.27545700 |
| C | 2.16138700  | -3.25681100 | -1.32469800 |
| C | 3.13950300  | -2.26352100 | -1.50818000 |
| C | 2.51267900  | -4.39850400 | -0.58791000 |
| C | 4.41806400  | -2.40041200 | -0.96843600 |
| H | 2.88582400  | -1.36794600 | -2.06969600 |
| C | 3.79508300  | -4.54073600 | -0.05134200 |
| H | 1.79039300  | -5.19505800 | -0.43522300 |
| C | 4.75241100  | -3.54261400 | -0.23618600 |
| H | 5.14935500  | -1.61139600 | -1.11998100 |
| H | 4.04432900  | -5.43823900 | 0.50916600  |
| H | 5.74990800  | -3.65611200 | 0.17998200  |
| C | -3.22971500 | -2.30841700 | -1.28329700 |
| C | -4.32910400 | -2.79223000 | -0.55925300 |
| C | -3.41623400 | -1.18975900 | -2.10935200 |
| C | -5.58296300 | -2.18618000 | -0.66235900 |
| H | -4.20191000 | -3.65700100 | 0.08900900  |
| C | -4.66706700 | -0.58166800 | -2.21394800 |
| H | -2.57363600 | -0.76935500 | -2.64955900 |
| C | -5.75578500 | -1.07793100 | -1.49332900 |
| H | -6.42212500 | -2.58163100 | -0.09545200 |
| H | -4.78564700 | 0.29091400  | -2.85046000 |
| H | -6.72892900 | -0.60099200 | -1.57491300 |
| C | 3.48066200  | 1.47308200  | 0.98702700  |
| C | 4.80000800  | 1.00572700  | 0.90738200  |
| C | 3.08791300  | 2.50553700  | 0.12055100  |
| C | 5.70577700  | 1.55303900  | -0.00446500 |
| H | 5.12247500  | 0.20558900  | 1.57033300  |
| C | 3.98985200  | 3.05482600  | -0.79084400 |
| H | 2.06532000  | 2.87299100  | 0.14142200  |
| C | 5.30306900  | 2.58152300  | -0.85716500 |
| H | 6.72529400  | 1.17750500  | -0.04387100 |
| H | 3.66243900  | 3.85156600  | -1.45331200 |
| H | 6.00416200  | 3.01058600  | -1.56805400 |
| C | -1.26719900 | 0.02963500  | 3.26587300  |
| C | -2.43742900 | 0.05090200  | 2.48505800  |
| C | -1.22653000 | -0.82839400 | 4.37449700  |
| C | -3.52315000 | -0.76730800 | 2.79487700  |

|   |             |             |             |
|---|-------------|-------------|-------------|
| H | -2.48572700 | 0.70217300  | 1.61548300  |
| C | -2.31795800 | -1.64264300 | 4.69115000  |
| H | -0.34654700 | -0.86072800 | 5.01011600  |
| C | -3.46776600 | -1.61926700 | 3.90193800  |
| H | -4.40815200 | -0.74132200 | 2.16529600  |
| H | -2.26564300 | -2.29390900 | 5.56012100  |
| H | -4.31488300 | -2.25367800 | 4.14918400  |
| H | -2.19162500 | -4.64838100 | -2.62628900 |
| H | -1.57983100 | -3.15868700 | -3.34422300 |
| H | 0.34698300  | -4.76122000 | -3.17496800 |
| H | -0.02824400 | -5.02602000 | -1.47239800 |
| H | 3.00921700  | 2.05480700  | 3.80860200  |
| H | 1.85360600  | 2.83696100  | 2.73099900  |
| H | 1.31273300  | 0.34088000  | 4.42560900  |
| H | 0.56671200  | 1.92009400  | 4.67927100  |

**TS1\_a'**

|    |             |             |             |
|----|-------------|-------------|-------------|
| Cu | -0.06289600 | 0.45577900  | -0.68359700 |
| C  | -1.70755000 | 2.95786000  | -2.06722700 |
| C  | -0.74803600 | 2.04114200  | -1.88638100 |
| C  | 0.44105400  | 1.57710600  | -2.44987700 |
| C  | -2.93913500 | 3.12655600  | -1.24849900 |
| C  | -3.32096900 | 4.39872600  | -0.78866300 |
| C  | -3.77755000 | 2.03871400  | -0.94894000 |
| C  | -4.48152000 | 4.57507500  | -0.03379600 |
| H  | -2.69436700 | 5.25971300  | -1.00529500 |
| C  | -4.94342500 | 2.21541100  | -0.20303000 |
| H  | -3.51296700 | 1.05279800  | -1.31204600 |
| C  | -5.29941700 | 3.48296100  | 0.26245200  |
| H  | -4.74619000 | 5.56782800  | 0.32213100  |
| H  | -5.57517800 | 1.35589300  | 0.00782600  |
| H  | -6.20728600 | 3.62014300  | 0.84458400  |
| H  | -1.41498500 | 1.29258900  | -0.36505200 |
| C  | -1.55216500 | 3.92700800  | -3.23104300 |
| H  | -1.50119000 | 4.96772000  | -2.88504200 |
| H  | -0.64224900 | 3.70968000  | -3.79465000 |
| H  | -2.41415500 | 3.86231300  | -3.90829900 |
| C  | 0.72628800  | -2.31425100 | 1.00645000  |
| C  | 1.76205400  | -1.30721100 | 1.54189700  |
| H  | 2.70747400  | -1.42034800 | 0.99975500  |
| H  | 1.96423100  | -1.51747100 | 2.59982100  |
| H  | -0.14745400 | -2.32846000 | 1.66762600  |
| H  | 1.15484400  | -3.32458900 | 1.01099900  |

|   |              |              |              |
|---|--------------|--------------|--------------|
| C | 1. 21205200  | -2. 78851600 | -1. 91161100 |
| H | 0. 99691600  | -2. 28832500 | -2. 86533600 |
| C | -1. 31319700 | -3. 22560900 | -0. 86580900 |
| H | -1. 24557700 | -3. 82299300 | 0. 05192100  |
| C | 2. 84974200  | 1. 39142800  | 1. 83930800  |
| H | 3. 53274000  | 0. 61044500  | 2. 19790100  |
| C | 0. 33230000  | 0. 95497800  | 2. 90491800  |
| H | -0. 24427300 | 1. 83565400  | 2. 59455100  |
| P | 0. 04773900  | -1. 89139600 | -0. 69145500 |
| P | 1. 25642300  | 0. 48236400  | 1. 30215700  |
| C | 2. 42655000  | 2. 24592900  | 3. 06183900  |
| C | 1. 42525300  | 1. 42670000  | 3. 88121800  |
| C | -0. 85721200 | -4. 11887700 | -2. 04830800 |
| C | 0. 66972400  | -4. 22547400 | -2. 00442300 |
| C | 2. 68586200  | -2. 60510000 | -1. 62205700 |
| C | 3. 30617600  | -1. 39371700 | -1. 97546600 |
| C | 3. 46633800  | -3. 58881000 | -0. 99641700 |
| C | 4. 65539800  | -1. 16987300 | -1. 70443200 |
| H | 2. 71484600  | -0. 61551200 | -2. 45142400 |
| C | 4. 82036800  | -3. 36835400 | -0. 72865600 |
| H | 3. 02665400  | -4. 54289700 | -0. 72233600 |
| C | 5. 42011400  | -2. 15841400 | -1. 07852300 |
| H | 5. 10619400  | -0. 22015100 | -1. 97794600 |
| H | 5. 40553000  | -4. 14916200 | -0. 24921900 |
| H | 6. 47359600  | -1. 98897100 | -0. 87189600 |
| C | -2. 73234100 | -2. 71867700 | -0. 99457600 |
| C | -3. 70046800 | -3. 08295900 | -0. 04902300 |
| C | -3. 13062200 | -1. 91820300 | -2. 07668900 |
| C | -5. 02852000 | -2. 67014200 | -0. 18054300 |
| H | -3. 41124500 | -3. 70057600 | 0. 79838300  |
| C | -4. 45632100 | -1. 50810100 | -2. 21517200 |
| H | -2. 39642700 | -1. 60529200 | -2. 81494400 |
| C | -5. 41246000 | -1. 88375100 | -1. 26727800 |
| H | -5. 76259800 | -2. 97048300 | 0. 56290000  |
| H | -4. 74254600 | -0. 89008500 | -3. 06200500 |
| H | -6. 44592100 | -1. 56650000 | -1. 37778900 |
| C | 3. 55625100  | 2. 17773600  | 0. 75685500  |
| C | 4. 91633100  | 1. 95745700  | 0. 49996900  |
| C | 2. 89361900  | 3. 17111200  | 0. 01803300  |
| C | 5. 60005100  | 2. 70628300  | -0. 46130100 |
| H | 5. 44700500  | 1. 19195900  | 1. 06206900  |
| C | 3. 57263200  | 3. 92112700  | -0. 94214600 |
| H | 1. 83430800  | 3. 35156800  | 0. 18416800  |
| C | 4. 92958100  | 3. 69205400  | -1. 18606400 |

|   |             |             |             |
|---|-------------|-------------|-------------|
| H | 6.65637900  | 2.52029500  | -0.63887700 |
| H | 3.03909700  | 4.68349400  | -1.50359700 |
| H | 5.45726300  | 4.27719900  | -1.93445000 |
| C | -0.65353700 | -0.08321800 | 3.39657900  |
| C | -1.92443400 | -0.15672000 | 2.79816100  |
| C | -0.35030500 | -0.99482100 | 4.41944400  |
| C | -2.85328600 | -1.11486600 | 3.20358500  |
| H | -2.17313700 | 0.53237100  | 1.99491300  |
| C | -1.28249600 | -1.95222800 | 4.82926400  |
| H | 0.61431500  | -0.95727600 | 4.91652900  |
| C | -2.53662600 | -2.01870900 | 4.22172900  |
| H | -3.82537200 | -1.15308700 | 2.71967900  |
| H | -1.02603400 | -2.64205900 | 5.62952900  |
| H | -3.26294800 | -2.76048700 | 4.54392000  |
| H | -1.34485500 | -5.09957800 | -1.99526900 |
| H | -1.16753000 | -3.66200800 | -2.99646400 |
| H | 1.07226100  | -4.74636000 | -2.88232600 |
| H | 0.96407700  | -4.80910800 | -1.12284600 |
| H | 3.30646800  | 2.53718100  | 3.64798800  |
| H | 1.95305400  | 3.17367200  | 2.71590100  |
| H | 1.94591400  | 0.57020400  | 4.32874500  |
| H | 0.99448100  | 2.00694300  | 4.70689800  |
| H | 1.38789200  | 2.06304400  | -2.22582100 |
| H | 0.41360600  | 0.94441800  | -3.33652300 |

### TS1\_b

|    |             |            |             |
|----|-------------|------------|-------------|
| Cu | -0.13700800 | 0.70491700 | 0.32484600  |
| C  | -1.83015200 | 0.96409700 | 1.75365700  |
| C  | -1.89634800 | 1.80376600 | 0.66634200  |
| C  | -2.74633500 | 2.44632400 | -0.15946300 |
| C  | -4.10995000 | 2.81188800 | 0.31514800  |
| C  | -5.12734000 | 3.11146000 | -0.61396400 |
| C  | -4.44434400 | 2.89531500 | 1.68295400  |
| C  | -6.41198800 | 3.46742100 | -0.19890700 |
| H  | -4.91872000 | 3.05502500 | -1.67743800 |
| C  | -5.72244800 | 3.25834800 | 2.09572100  |
| H  | -3.68325900 | 2.67911800 | 2.42483900  |
| C  | -6.72018900 | 3.54538900 | 1.15829500  |
| H  | -7.17270800 | 3.68420400 | -0.94520800 |
| H  | -5.94103800 | 3.32289500 | 3.15913400  |
| H  | -7.71871100 | 3.82575300 | 1.48313600  |
| H  | -2.52757700 | 0.13211900 | 1.83579600  |
| H  | -1.26729800 | 1.22931200 | 2.64744100  |

|   |             |             |             |
|---|-------------|-------------|-------------|
| H | -0.20857700 | 2.30687600  | -0.01061200 |
| C | 2.45648000  | -1.37431700 | -0.05785300 |
| C | 1.38001600  | -2.05587700 | -0.92515800 |
| P | 1.76972400  | -0.24837900 | 1.27317100  |
| P | -0.00235500 | -0.90515200 | -1.45634800 |
| C | 3.35294800  | 0.58129400  | 1.92254900  |
| H | 4.18155000  | -0.02625400 | 1.53371200  |
| C | 1.55324000  | -1.30799800 | 2.85097600  |
| H | 0.74088400  | -0.78735600 | 3.37313500  |
| C | 0.49794300  | -0.22050200 | -3.16860000 |
| H | -0.05650200 | 0.72531000  | -3.21393600 |
| C | -1.25342900 | -2.13448400 | -2.19814200 |
| H | -0.71941900 | -3.09025200 | -2.28532100 |
| C | -2.36154000 | 2.84236300  | -1.56475400 |
| H | -2.73691600 | 2.13582000  | -2.32013600 |
| H | -2.75815000 | 3.83116800  | -1.82490600 |
| H | -1.26934900 | 2.85847500  | -1.64443800 |
| C | 3.29403900  | 0.34663900  | 3.45183700  |
| C | 2.84215600  | -1.10192800 | 3.67097800  |
| C | -0.13184500 | -1.18103500 | -4.19565400 |
| C | -1.49334600 | -1.60793000 | -3.63483800 |
| C | 1.96970600  | 0.10860400  | -3.30087200 |
| C | 2.45258600  | 1.30221700  | -2.73442900 |
| C | 2.88758600  | -0.73866300 | -3.93922000 |
| C | 3.80651800  | 1.63098800  | -2.79389800 |
| H | 1.75780800  | 1.96616800  | -2.22517900 |
| C | 4.24364500  | -0.40634400 | -4.00728400 |
| H | 2.55060700  | -1.66143600 | -4.40192800 |
| C | 4.70957900  | 0.77625900  | -3.43271000 |
| H | 4.15382500  | 2.55327100  | -2.33658300 |
| H | 4.93408800  | -1.07561700 | -4.51456200 |
| H | 5.76424400  | 1.03312000  | -3.48656200 |
| C | -2.51319000 | -2.36698500 | -1.39165200 |
| C | -2.92603900 | -3.67491000 | -1.10062900 |
| C | -3.31507000 | -1.30312600 | -0.94858700 |
| C | -4.10608300 | -3.91792900 | -0.39322900 |
| H | -2.31790000 | -4.51319300 | -1.43445100 |
| C | -4.49428800 | -1.54141800 | -0.24208800 |
| H | -3.00783900 | -0.27714900 | -1.13083700 |
| C | -4.89496800 | -2.85057300 | 0.03827600  |
| H | -4.40811300 | -4.94112600 | -0.18357400 |
| H | -5.09443700 | -0.69954400 | 0.09242800  |
| H | -5.81314500 | -3.03544900 | 0.58948400  |
| C | 3.59393900  | 2.01820300  | 1.51405100  |

|   |              |              |              |
|---|--------------|--------------|--------------|
| C | 2. 61732100  | 3. 01223000  | 1. 67728100  |
| C | 4. 84310200  | 2. 39112600  | 0. 99690900  |
| C | 2. 88711200  | 4. 33887100  | 1. 34124200  |
| H | 1. 62883200  | 2. 74518700  | 2. 03782600  |
| C | 5. 11685500  | 3. 71852200  | 0. 66054100  |
| H | 5. 61205400  | 1. 63319300  | 0. 86110500  |
| C | 4. 13777800  | 4. 69841200  | 0. 83376600  |
| H | 2. 11201700  | 5. 09009500  | 1. 46648000  |
| H | 6. 09420200  | 3. 98493100  | 0. 26593200  |
| H | 4. 34529300  | 5. 73247900  | 0. 57148600  |
| C | 1. 09017900  | -2. 72575200 | 2. 59532500  |
| C | -0. 28031200 | -2. 96790600 | 2. 39580900  |
| C | 1. 96990500  | -3. 81629000 | 2. 52015300  |
| C | -0. 75490700 | -4. 25063800 | 2. 12355500  |
| H | -0. 97659700 | -2. 13411700 | 2. 44149100  |
| C | 1. 49618000  | -5. 10375700 | 2. 25397900  |
| H | 3. 03435800  | -3. 67325700 | 2. 68048300  |
| C | 0. 13378600  | -5. 32667600 | 2. 05207600  |
| H | -1. 81828900 | -4. 40502500 | 1. 96409000  |
| H | 2. 19722200  | -5. 93337500 | 2. 20864800  |
| H | -0. 23295500 | -6. 32890500 | 1. 84700300  |
| H | -1. 97414000 | -2. 37757700 | -4. 25027500 |
| H | -2. 17629700 | -0. 74890200 | -3. 60479700 |
| H | -0. 21882500 | -0. 70428300 | -5. 17989700 |
| H | 0. 49061900  | -2. 07532900 | -4. 32554000 |
| H | 4. 26998800  | 0. 55076000  | 3. 90775300  |
| H | 2. 57653700  | 1. 04241900  | 3. 90660000  |
| H | 2. 67128000  | -1. 32798600 | 4. 73064300  |
| H | 3. 63687700  | -1. 77408000 | 3. 32481200  |
| H | 3. 07949900  | -0. 72461200 | -0. 68363000 |
| H | 3. 11370100  | -2. 13373400 | 0. 38328700  |
| H | 0. 88948300  | -2. 85032800 | -0. 35089600 |
| H | 1. 85356200  | -2. 52662600 | -1. 79584600 |

### TS1\_b'

|    |             |              |              |
|----|-------------|--------------|--------------|
| Cu | 0. 44273600 | -0. 27839500 | -0. 42516900 |
| C  | 2. 58229700 | -0. 19611800 | 0. 09886200  |
| C  | 2. 27909400 | -1. 33401000 | -0. 62177200 |
| C  | 2. 68918000 | -2. 59390800 | -0. 86267100 |
| C  | 4. 10614000 | -2. 97600300 | -0. 59010500 |
| C  | 4. 45660900 | -4. 33289400 | -0. 44183200 |
| C  | 5. 14719500 | -2. 02994200 | -0. 49806900 |
| C  | 5. 77521400 | -4. 72390000 | -0. 20222500 |

|   |             |             |             |
|---|-------------|-------------|-------------|
| H | 3.68870800  | -5.09708300 | -0.50128100 |
| C | 6.46297600  | -2.42046200 | -0.26832700 |
| H | 4.91336200  | -0.97764700 | -0.61540100 |
| C | 6.78927900  | -3.77155800 | -0.11470000 |
| H | 6.00574400  | -5.78013500 | -0.08459200 |
| H | 7.24205000  | -1.66357600 | -0.21294900 |
| H | 7.81708800  | -4.07384900 | 0.06845200  |
| H | 2.84932400  | 0.74030100  | -0.38536000 |
| H | 2.83582900  | -0.28927200 | 1.15465000  |
| H | 0.77390200  | -1.25857400 | -1.68955400 |
| C | -2.39592100 | 0.90581000  | 0.97910100  |
| C | -1.80796800 | 2.13943700  | 0.26835300  |
| P | -1.14367300 | -0.43832500 | 1.35023200  |
| P | -0.61348300 | 1.72329600  | -1.11638900 |
| C | -2.28350200 | -1.81846500 | 1.99637800  |
| H | -3.23511000 | -1.32650300 | 2.24059600  |
| C | -0.43532700 | -0.07811200 | 3.09390000  |
| H | 0.57027300  | -0.51099100 | 3.03041400  |
| C | -1.69435300 | 1.62805400  | -2.68527100 |
| H | -1.05333400 | 1.07719800  | -3.38587200 |
| C | 0.04367700  | 3.46523400  | -1.55669400 |
| H | -0.51495400 | 4.15377500  | -0.91009400 |
| C | 1.78860600  | -3.66492700 | -1.42808300 |
| H | 2.30503700  | -4.25284300 | -2.19716400 |
| H | 1.45091700  | -4.37178200 | -0.65648000 |
| H | 0.89871300  | -3.20008300 | -1.86298900 |
| C | -1.63247500 | -2.23612800 | 3.33685800  |
| C | -1.25563800 | -0.94514300 | 4.07216400  |
| C | -1.80146500 | 3.07916000  | -3.18614800 |
| C | -0.41582000 | 3.70894500  | -3.01649500 |
| C | -2.97341100 | 0.83698400  | -2.51518600 |
| C | -2.90740200 | -0.56775700 | -2.49228600 |
| C | -4.22835700 | 1.44383600  | -2.35933400 |
| C | -4.05412000 | -1.33802600 | -2.30442000 |
| H | -1.94083500 | -1.05420300 | -2.59984000 |
| C | -5.38036200 | 0.67224100  | -2.17963100 |
| H | -4.32154600 | 2.52529800  | -2.38893800 |
| C | -5.29802700 | -0.71971400 | -2.14736000 |
| H | -3.97354000 | -2.42072800 | -2.27409500 |
| H | -6.34300500 | 1.16516600  | -2.06815100 |
| H | -6.19380100 | -1.31865400 | -2.00604000 |
| C | 1.52015400  | 3.69289200  | -1.31965000 |
| C | 1.94482100  | 4.66375700  | -0.40212100 |
| C | 2.49901300  | 2.97280400  | -2.02305100 |

|   |              |              |              |
|---|--------------|--------------|--------------|
| C | 3. 30317300  | 4. 91329600  | -0. 19210200 |
| H | 1. 20224400  | 5. 23357500  | 0. 15218900  |
| C | 3. 85638800  | 3. 22035600  | -1. 81781100 |
| H | 2. 20053000  | 2. 20389600  | -2. 73168700 |
| C | 4. 26478900  | 4. 19262400  | -0. 90077300 |
| H | 3. 60734600  | 5. 67519100  | 0. 52123800  |
| H | 4. 59596400  | 2. 64992000  | -2. 37338300 |
| H | 5. 32233200  | 4. 38503800  | -0. 74191900 |
| C | -2. 58019800 | -2. 96817400 | 1. 05868800  |
| C | -1. 56691000 | -3. 63837900 | 0. 35722400  |
| C | -3. 89957800 | -3. 42213700 | 0. 91653300  |
| C | -1. 86616600 | -4. 73084400 | -0. 45735900 |
| H | -0. 54120900 | -3. 28925900 | 0. 42802300  |
| C | -4. 20228900 | -4. 51682000 | 0. 10452700  |
| H | -4. 69929200 | -2. 91263400 | 1. 45030600  |
| C | -3. 18412500 | -5. 17631100 | -0. 58642000 |
| H | -1. 06618700 | -5. 22998500 | -0. 99738700 |
| H | -5. 23223300 | -4. 85244900 | 0. 01282200  |
| H | -3. 41459000 | -6. 02801300 | -1. 22097500 |
| C | -0. 27524800 | 1. 39102500  | 3. 42026000  |
| C | 0. 90105600  | 2. 05365000  | 3. 02871900  |
| C | -1. 26456400 | 2. 14086900  | 4. 07596700  |
| C | 1. 08101000  | 3. 41433700  | 3. 27688600  |
| H | 1. 67613600  | 1. 49359500  | 2. 51236500  |
| C | -1. 08502800 | 3. 50299300  | 4. 32974100  |
| H | -2. 18348500 | 1. 66463100  | 4. 40511800  |
| C | 0. 08672900  | 4. 14697400  | 3. 93005100  |
| H | 2. 00011000  | 3. 89869600  | 2. 95850800  |
| H | -1. 86385200 | 4. 05878000  | 4. 84579900  |
| H | 0. 22650600  | 5. 20568900  | 4. 13172500  |
| H | -0. 41552900 | 4. 78204400  | -3. 24186000 |
| H | 0. 29116400  | 3. 23822900  | -3. 71094200 |
| H | -2. 14655200 | 3. 11493200  | -4. 22700600 |
| H | -2. 52773500 | 3. 64408100  | -2. 58774400 |
| H | -2. 32063900 | -2. 85965200 | 3. 91993000  |
| H | -0. 73696200 | -2. 84176500 | 3. 14352600  |
| H | -0. 68642500 | -1. 14029300 | 4. 98926400  |
| H | -2. 17626000 | -0. 42986600 | 4. 37182500  |
| H | -2. 62343800 | 2. 77477600  | -0. 10085700 |
| H | -1. 22849000 | 2. 73648100  | 0. 98214200  |
| H | -3. 14086500 | 0. 42608300  | 0. 33387100  |
| H | -2. 91027800 | 1. 21808800  | 1. 89617100  |

TS1\_c



|    |             |             |             |
|----|-------------|-------------|-------------|
| Cu | -0.27899200 | -0.15959800 | -1.26821000 |
| C  | 1.27030100  | 0.01388800  | -3.95852500 |
| C  | 0.75143800  | -0.82178200 | -3.05870000 |
| C  | 0.91696200  | -2.06764200 | -2.48070500 |
| H  | 2.03162000  | -0.34297500 | -4.65151900 |
| H  | 0.94289300  | 1.04409600  | -4.05522000 |
| H  | -0.89311300 | -0.13395700 | -2.78624800 |
| P  | -1.16366400 | -0.95942500 | 0.75904400  |
| P  | 0.31693200  | 1.91364400  | -0.07410700 |
| C  | -1.32319500 | 0.54296200  | 1.85929000  |
| C  | -0.18933300 | 1.57327300  | 1.70118100  |
| C  | -0.81366100 | 3.34928700  | -0.63769400 |
| H  | -0.75904400 | 3.28185600  | -1.73190200 |
| C  | 1.80627100  | 3.08036500  | 0.22198300  |
| C  | -2.78549500 | -1.87015400 | 1.12940400  |
| C  | -0.09928800 | -2.25903500 | 1.68009800  |
| H  | 0.44724200  | -2.74925700 | 0.86674300  |
| C  | -1.10101900 | -3.28399800 | 2.26244800  |
| C  | -2.32534500 | -3.33216000 | 1.34044600  |
| H  | -3.10909600 | -1.49112200 | 2.10898500  |
| C  | -0.08603300 | 4.63697100  | -0.20963600 |
| C  | 1.40646400  | 4.41210100  | -0.46131000 |
| H  | 1.81865100  | 3.25345900  | 1.30576400  |
| C  | -2.26847300 | 3.20082700  | -0.24308200 |
| C  | -3.09675500 | 2.34857200  | -0.99470700 |
| C  | -2.82775500 | 3.86313800  | 0.86001400  |
| C  | -4.43274500 | 2.15323200  | -0.64650800 |
| H  | -2.67762400 | 1.81585200  | -1.84522400 |
| C  | -4.16941900 | 3.67539900  | 1.20500600  |
| H  | -2.22450900 | 4.54161800  | 1.45553100  |
| C  | -4.97562300 | 2.81741400  | 0.45697900  |
| H  | -5.04600000 | 1.47535400  | -1.23295800 |
| H  | -4.58159200 | 4.20554100  | 2.06007200  |
| H  | -6.01760500 | 2.66871900  | 0.72735500  |
| C  | 3.17203500  | 2.57332700  | -0.18454200 |
| C  | 4.19635800  | 2.47657700  | 0.76785000  |
| C  | 3.47240700  | 2.25218300  | -1.51747500 |
| C  | 5.48616300  | 2.08463000  | 0.40281100  |
| H  | 3.98301500  | 2.71970600  | 1.80652600  |
| C  | 4.76040600  | 1.86523700  | -1.88709900 |
| H  | 2.69089000  | 2.28797000  | -2.27208200 |
| C  | 5.77460800  | 1.78305100  | -0.92877400 |
| H  | 6.26515400  | 2.02267600  | 1.15842000  |

|   |              |              |              |
|---|--------------|--------------|--------------|
| H | 4. 97043500  | 1. 62164100  | -2. 92510800 |
| H | 6. 77886900  | 1. 48619100  | -1. 21909700 |
| C | 0. 92946800  | -1. 67996600 | 2. 62860200  |
| C | 0. 64175500  | -1. 36993000 | 3. 96773500  |
| C | 2. 22292300  | -1. 40929500 | 2. 15072300  |
| C | 1. 61109200  | -0. 80402000 | 4. 79900100  |
| H | -0. 34311700 | -1. 57526900 | 4. 37785400  |
| C | 3. 19093500  | -0. 83983100 | 2. 97890200  |
| H | 2. 47621000  | -1. 64839600 | 1. 12151300  |
| C | 2. 88937000  | -0. 53314800 | 4. 30792000  |
| H | 1. 36483300  | -0. 57833300 | 5. 83357600  |
| H | 4. 18170900  | -0. 64177700 | 2. 57935000  |
| H | 3. 64366600  | -0. 09537600 | 4. 95653100  |
| C | -3. 93572600 | -1. 69550600 | 0. 16176600  |
| C | -3. 78117600 | -1. 85768500 | -1. 22299400 |
| C | -5. 21660500 | -1. 41260500 | 0. 65900600  |
| C | -4. 87585800 | -1. 74557100 | -2. 08090900 |
| H | -2. 79642200 | -2. 04782400 | -1. 63644100 |
| C | -6. 31465300 | -1. 30327900 | -0. 19598100 |
| H | -5. 35595900 | -1. 28081900 | 1. 73012800  |
| C | -6. 14772200 | -1. 47093900 | -1. 57196300 |
| H | -4. 73116900 | -1. 86876000 | -3. 15104000 |
| H | -7. 29817900 | -1. 08759500 | 0. 21376300  |
| H | -6. 99951500 | -1. 38729000 | -2. 24181000 |
| C | 2. 15296800  | -2. 48051500 | -1. 79949300 |
| C | 3. 25649500  | -1. 60985900 | -1. 62344800 |
| C | 2. 30596200  | -3. 80129300 | -1. 31359500 |
| C | 4. 42222200  | -2. 02899000 | -0. 99473600 |
| H | 3. 18491700  | -0. 59050300 | -1. 98622500 |
| C | 3. 48230700  | -4. 21855200 | -0. 68636800 |
| H | 1. 50532200  | -4. 52179500 | -1. 44450400 |
| C | 4. 55169800  | -3. 34083700 | -0. 51753300 |
| H | 5. 23987700  | -1. 32151700 | -0. 87801300 |
| H | 3. 55864400  | -5. 24473500 | -0. 33340000 |
| H | 5. 46769900  | -3. 66772300 | -0. 03308200 |
| C | -0. 18845400 | -3. 08146600 | -2. 69566300 |
| H | -1. 08911000 | -2. 57612900 | -3. 05674400 |
| H | 0. 09296400  | -3. 82807400 | -3. 45352400 |
| H | -0. 44870600 | -3. 63582700 | -1. 78329400 |
| H | -3. 13835500 | -3. 93282600 | 1. 76524200  |
| H | -2. 06403900 | -3. 78378500 | 0. 37405900  |
| H | -1. 42815100 | -2. 98003000 | 3. 26384900  |
| H | -0. 62387700 | -4. 26559700 | 2. 36812000  |
| H | 2. 02249800  | 5. 23489600  | -0. 07920100 |

|   |             |            |             |
|---|-------------|------------|-------------|
| H | 1.59740800  | 4.34638800 | -1.53996300 |
| H | -0.24076500 | 4.83521100 | 0.85840600  |
| H | -0.47206600 | 5.50670900 | -0.75571000 |
| H | -2.28210100 | 0.99431300 | 1.58016200  |
| H | -1.39835900 | 0.23932200 | 2.91024600  |
| H | 0.71760000  | 1.19816500 | 2.18940100  |
| H | -0.46956200 | 2.50640400 | 2.20637000  |

**TS1\_c'**

|    |             |             |             |
|----|-------------|-------------|-------------|
| Cu | 0.23897700  | 1.01233500  | 0.53326800  |
| C  | 1.36164500  | 3.38051500  | 2.30256300  |
| C  | 0.33164100  | 2.67185200  | 1.84973500  |
| C  | -0.95049700 | 2.27103400  | 2.21659400  |
| H  | 1.24698500  | 3.97787800  | 3.20785200  |
| H  | 2.32176600  | 3.40013400  | 1.79959500  |
| H  | 0.89154200  | 2.44937200  | 0.13836700  |
| P  | 1.48384500  | -1.02039100 | 0.96214300  |
| P  | -0.63781900 | -0.00705600 | -1.42516700 |
| C  | 1.45130500  | -1.85428700 | -0.71515000 |
| C  | 0.12527100  | -1.71446000 | -1.48247700 |
| C  | -0.00141500 | 1.01274600  | -2.91996700 |
| H  | 0.09863100  | 2.00868400  | -2.47748300 |
| C  | -2.30745200 | -0.34331700 | -2.26341400 |
| C  | 3.31251800  | -1.29594500 | 1.43659600  |
| C  | 0.86624700  | -2.30500200 | 2.24586300  |
| H  | 0.44104600  | -1.66628300 | 3.02991200  |
| C  | 2.13355900  | -2.97090000 | 2.82211800  |
| C  | 3.24229800  | -1.91401300 | 2.85082900  |
| H  | 3.66176500  | -2.08541800 | 0.75736100  |
| C  | -1.16346900 | 1.05185000  | -3.94138000 |
| C  | -2.48469100 | 0.89022800  | -3.17732900 |
| H  | -2.11929900 | -1.20272800 | -2.92293700 |
| C  | 1.36233700  | 0.60531900  | -3.43572000 |
| C  | 2.50726100  | 1.22131700  | -2.90065800 |
| C  | 1.54435300  | -0.39160300 | -4.40793000 |
| C  | 3.78622000  | 0.85252300  | -3.31897800 |
| H  | 2.38559500  | 1.98567400  | -2.13721900 |
| C  | 2.82370100  | -0.75752200 | -4.83280600 |
| H  | 0.68458700  | -0.88704000 | -4.85058400 |
| C  | 3.95062400  | -0.13894400 | -4.28938100 |
| H  | 4.65283200  | 1.34182500  | -2.88258800 |
| H  | 2.93684000  | -1.52673100 | -5.59273400 |
| H  | 4.94547200  | -0.42264400 | -4.62265400 |

|   |             |             |             |
|---|-------------|-------------|-------------|
| C | -3.48897000 | -0.68802700 | -1.38762600 |
| C | -4.23167200 | -1.84662400 | -1.66087200 |
| C | -3.90611900 | 0.13912300  | -0.33428200 |
| C | -5.36492700 | -2.17092200 | -0.91288900 |
| H | -3.92185600 | -2.49889700 | -2.47487300 |
| C | -5.03666300 | -0.18495100 | 0.41667200  |
| H | -3.35046800 | 1.04031900  | -0.09328500 |
| C | -5.77197600 | -1.33852100 | 0.13114800  |
| H | -5.92843000 | -3.07033300 | -1.14861900 |
| H | -5.34136100 | 0.47579800  | 1.22268100  |
| H | -6.65610200 | -1.58307100 | 0.71443400  |
| C | -0.23763400 | -3.21589900 | 1.75584100  |
| C | 0.01019700  | -4.46491300 | 1.16485700  |
| C | -1.57310700 | -2.79234700 | 1.86368400  |
| C | -1.03972200 | -5.25880800 | 0.69687700  |
| H | 1.02699900  | -4.83496500 | 1.07228000  |
| C | -2.62309100 | -3.57776300 | 1.38928500  |
| H | -1.78894200 | -1.82957600 | 2.32078700  |
| C | -2.35938400 | -4.81797200 | 0.80303300  |
| H | -0.82168600 | -6.22548900 | 0.24981300  |
| H | -3.64337300 | -3.21523500 | 1.46984300  |
| H | -3.17492800 | -5.43474900 | 0.43536900  |
| C | 4.24748400  | -0.11782400 | 1.28751400  |
| C | 4.15243900  | 1.01630100  | 2.10798400  |
| C | 5.27046900  | -0.15800100 | 0.32899200  |
| C | 5.05876700  | 2.06875800  | 1.97983600  |
| H | 3.35575400  | 1.08836800  | 2.84253300  |
| C | 6.17583100  | 0.89653000  | 0.19367900  |
| H | 5.36256400  | -1.02922800 | -0.31609200 |
| C | 6.07494300  | 2.01419000  | 1.02272200  |
| H | 4.96770800  | 2.93624300  | 2.62823100  |
| H | 6.96364000  | 0.83848700  | -0.55316100 |
| H | 6.77998900  | 2.83532800  | 0.92534300  |
| C | -2.12452100 | 2.90659700  | 1.60979400  |
| C | -2.00386000 | 3.76446700  | 0.48741400  |
| C | -3.42249200 | 2.72897800  | 2.14356000  |
| C | -3.11695500 | 4.38612700  | -0.07115100 |
| H | -1.01965500 | 3.94033500  | 0.06613000  |
| C | -4.53003900 | 3.37180300  | 1.59008100  |
| H | -3.56445000 | 2.09279900  | 3.01158600  |
| C | -4.39206700 | 4.19969100  | 0.47408300  |
| H | -2.98540400 | 5.03897600  | -0.93157100 |
| H | -5.50989200 | 3.22614300  | 2.04010300  |
| H | -5.25654700 | 4.69866000  | 0.04489600  |

|   |             |             |             |
|---|-------------|-------------|-------------|
| C | -1.11875200 | 1.40961500  | 3.45897600  |
| H | -0.15928600 | 0.97326300  | 3.75159000  |
| H | -1.48378900 | 2.00376800  | 4.31235100  |
| H | -1.83478400 | 0.58913200  | 3.31573100  |
| H | 4.21264500  | -2.34062500 | 3.13136800  |
| H | 3.00741400  | -1.13929700 | 3.59222400  |
| H | 2.45786200  | -3.80291200 | 2.18555400  |
| H | 1.93310000  | -3.38989500 | 3.81578200  |
| H | -3.33523100 | 0.74864400  | -3.85466900 |
| H | -2.69756000 | 1.78040500  | -2.57099200 |
| H | -1.07465700 | 0.23113000  | -4.66281500 |
| H | -1.13048000 | 1.98381300  | -4.51814000 |
| H | 2.25716900  | -1.36949600 | -1.27944900 |
| H | 1.71215600  | -2.91576200 | -0.62130800 |
| H | -0.63249900 | -2.37100900 | -1.03873800 |
| H | 0.26807000  | -2.03580600 | -2.52112300 |

#### TS1\_d

|    |             |             |             |
|----|-------------|-------------|-------------|
| Cu | -0.05517300 | -0.25233600 | -1.16768500 |
| C  | 0.83416400  | -0.95158000 | -4.09744900 |
| C  | 0.42421900  | -1.38429200 | -2.90671600 |
| C  | 0.54607900  | -2.45813600 | -2.03348100 |
| C  | -0.60694400 | -3.30385600 | -1.71321400 |
| C  | -0.50223200 | -4.39260800 | -0.81404500 |
| C  | -1.87452200 | -3.08295800 | -2.30786500 |
| C  | -1.60047300 | -5.19778000 | -0.51510200 |
| H  | 0.45419600  | -4.62106100 | -0.35405100 |
| C  | -2.96893200 | -3.88731800 | -1.99920000 |
| H  | -1.98123900 | -2.27862100 | -3.02760400 |
| C  | -2.84632300 | -4.95014200 | -1.09804900 |
| H  | -1.47863900 | -6.03070200 | 0.17401200  |
| H  | -3.92577700 | -3.69061700 | -2.47772400 |
| H  | -3.69964700 | -5.58285000 | -0.86941100 |
| H  | 1.32045400  | -1.64147300 | -4.78717900 |
| H  | 0.67943600  | 0.06886900  | -4.43262000 |
| C  | 1.93379600  | -2.88765400 | -1.58616100 |
| H  | 2.00771500  | -3.05500800 | -0.50357000 |
| H  | 2.22398000  | -3.83440500 | -2.06867400 |
| H  | 2.67562300  | -2.13344900 | -1.85294200 |
| H  | -0.90104300 | -0.15290900 | -2.54931300 |
| P  | -0.97901700 | -0.32347500 | 0.99918500  |
| P  | 1.38433700  | 1.57250300  | -0.39207800 |
| C  | -0.43941300 | 1.26704200  | 1.81799500  |

|   |             |             |             |
|---|-------------|-------------|-------------|
| C | 0.98100500  | 1.72527300  | 1.43551500  |
| C | 0.90848100  | 3.25734500  | -1.15978000 |
| H | 0.78622200  | 3.00832400  | -2.22158300 |
| C | 3.24717900  | 2.00750900  | -0.36348500 |
| C | -2.78378100 | -0.46302800 | 1.55694100  |
| C | -0.42662100 | -1.79961700 | 2.09269400  |
| H | -0.11250900 | -2.53755700 | 1.34741400  |
| C | -1.71695400 | -2.33515800 | 2.76374300  |
| C | -2.91657000 | -1.96885700 | 1.88035300  |
| H | -2.83135400 | 0.07838400  | 2.51271800  |
| C | 2.16298300  | 4.14084500  | -1.02650500 |
| C | 3.37464700  | 3.24231400  | -1.28835300 |
| H | 3.44666000  | 2.34253300  | 0.66272700  |
| C | -0.40816200 | 3.82308500  | -0.67026300 |
| C | -1.60813400 | 3.31348500  | -1.19768600 |
| C | -0.48824400 | 4.82536300  | 0.30792200  |
| C | -2.84438000 | 3.78102700  | -0.75383800 |
| H | -1.56736000 | 2.52455600  | -1.94515400 |
| C | -1.72688400 | 5.30167300  | 0.74728200  |
| H | 0.41623300  | 5.25498400  | 0.72782900  |
| C | -2.90876600 | 4.77980800  | 0.22182900  |
| H | -3.75603800 | 3.35731600  | -1.16443600 |
| H | -1.76273000 | 6.08508300  | 1.50032500  |
| H | -3.87159200 | 5.14837800  | 0.56556100  |
| C | 4.21024700  | 0.88713900  | -0.68592400 |
| C | 5.16694800  | 0.48956600  | 0.25892700  |
| C | 4.21103700  | 0.25294100  | -1.93835000 |
| C | 6.10347700  | -0.50383600 | -0.03588300 |
| H | 5.18293200  | 0.96949800  | 1.23520600  |
| C | 5.14951700  | -0.73465800 | -2.23836900 |
| H | 3.46240800  | 0.51828700  | -2.68058600 |
| C | 6.10076700  | -1.11715900 | -1.28893600 |
| H | 6.83791700  | -0.79164300 | 0.71215100  |
| H | 5.13221300  | -1.21136900 | -3.21487800 |
| H | 6.83022100  | -1.88730300 | -1.52457400 |
| C | 0.75157600  | -1.52221700 | 3.00081400  |
| C | 0.61388200  | -0.92815000 | 4.26650800  |
| C | 2.04918800  | -1.84046100 | 2.56618800  |
| C | 1.72872800  | -0.66275300 | 5.06412800  |
| H | -0.37272600 | -0.67343800 | 4.64340000  |
| C | 3.16648400  | -1.57264200 | 3.35806300  |
| H | 2.18319700  | -2.30525500 | 1.59272500  |
| C | 3.01115700  | -0.98142200 | 4.61357400  |
| H | 1.59207500  | -0.20747200 | 6.04176400  |

|   |             |             |             |
|---|-------------|-------------|-------------|
| H | 4.15654000  | -1.83040100 | 2.99146000  |
| H | 3.87789600  | -0.77648700 | 5.23617400  |
| C | -3.85124700 | 0.10588300  | 0.64937800  |
| C | -3.98437700 | -0.29561900 | -0.68875400 |
| C | -4.77422700 | 1.02863200  | 1.16330800  |
| C | -5.01443000 | 0.20956900  | -1.48263200 |
| H | -3.27416500 | -0.99593800 | -1.11521100 |
| C | -5.80857800 | 1.53189800  | 0.37195900  |
| H | -4.68590300 | 1.35170400  | 2.19864900  |
| C | -5.93261500 | 1.12258800  | -0.95684000 |
| H | -5.09771700 | -0.11184700 | -2.51766600 |
| H | -6.51591200 | 2.24093200  | 0.79491000  |
| H | -6.73720800 | 1.50953400  | -1.57688700 |
| H | -3.86977400 | -2.16998200 | 2.38370300  |
| H | -2.90724800 | -2.55702600 | 0.95461900  |
| H | -1.63906900 | -3.41761700 | 2.91790300  |
| H | -1.85298400 | -1.88160300 | 3.75253500  |
| H | 3.38352400  | 2.92275700  | -2.33816900 |
| H | 4.32411200  | 3.75948600  | -1.10499400 |
| H | 2.24147100  | 4.55440500  | -0.01322900 |
| H | 2.11974900  | 4.99186600  | -1.71753700 |
| H | -0.51703900 | 1.18510600  | 2.90827200  |
| H | -1.17424200 | 2.01258800  | 1.49213200  |
| H | 1.71943500  | 1.09350300  | 1.94365100  |
| H | 1.14141700  | 2.75376600  | 1.78296600  |

### TS1\_d'

|    |             |             |             |
|----|-------------|-------------|-------------|
| Cu | -0.21301000 | -0.08587700 | -1.26953200 |
| C  | -1.34180900 | -1.74420900 | -3.78565500 |
| C  | -0.34490400 | -1.33155100 | -3.00938100 |
| C  | 0.93699900  | -1.67861300 | -2.59102100 |
| C  | 1.18556300  | -2.90143000 | -1.81062100 |
| C  | 2.49853700  | -3.26986900 | -1.42910600 |
| C  | 0.14897200  | -3.79648100 | -1.44317700 |
| C  | 2.75142400  | -4.43910500 | -0.71060000 |
| H  | 3.33501600  | -2.63469400 | -1.70176400 |
| C  | 0.40713300  | -4.95953600 | -0.72412900 |
| H  | -0.86779200 | -3.57408000 | -1.75109000 |
| C  | 1.71186300  | -5.29507100 | -0.34320300 |
| H  | 3.77675200  | -4.68298700 | -0.44075800 |
| H  | -0.41907000 | -5.62132300 | -0.47146200 |
| H  | 1.91204500  | -6.20793800 | 0.21070400  |
| H  | -1.19388500 | -2.61269400 | -4.42867800 |

|   |             |             |             |
|---|-------------|-------------|-------------|
| H | -2.30627200 | -1.24872000 | -3.81488700 |
| C | 2.10528300  | -0.93788500 | -3.22226700 |
| H | 2.88988000  | -0.67611900 | -2.50612800 |
| H | 2.57113900  | -1.54297100 | -4.01666500 |
| H | 1.75436800  | -0.00833600 | -3.68155200 |
| H | -1.02280100 | 0.29579100  | -2.63080400 |
| P | -0.99214800 | -0.72519700 | 0.90515500  |
| P | 0.63249900  | 1.94366900  | -0.30510300 |
| C | -0.94775200 | 0.88294000  | 1.85878100  |
| C | 0.25932600  | 1.77789200  | 1.52530800  |
| C | -0.39101100 | 3.44235100  | -0.91307300 |
| H | -0.49836200 | 3.22962300  | -1.98350800 |
| C | 2.24955200  | 2.97097000  | -0.22212400 |
| C | -2.66675500 | -1.43796500 | 1.45551600  |
| C | 0.00456800  | -2.01741800 | 1.91006000  |
| H | 0.41578000  | -2.65976100 | 1.12524800  |
| C | -1.04532000 | -2.84403700 | 2.68749500  |
| C | -2.32363900 | -2.89507100 | 1.84416900  |
| H | -2.92079100 | -0.90616900 | 2.38302300  |
| C | 0.53050900  | 4.66858100  | -0.76172200 |
| C | 1.95464800  | 4.21384100  | -1.09131700 |
| H | 2.30145200  | 3.30957400  | 0.82111900  |
| C | -1.78426000 | 3.54350200  | -0.32685600 |
| C | -2.82392200 | 2.79223000  | -0.90268700 |
| C | -2.08545900 | 4.34379200  | 0.78611100  |
| C | -4.11550600 | 2.83109900  | -0.37804300 |
| H | -2.60337500 | 2.15381500  | -1.75440700 |
| C | -3.38084500 | 4.38954900  | 1.30847400  |
| H | -1.31369300 | 4.94992900  | 1.25107400  |
| C | -4.40027400 | 3.63202400  | 0.73115600  |
| H | -4.89668800 | 2.22930200  | -0.83348000 |
| H | -3.59022100 | 5.02324200  | 2.16673800  |
| H | -5.40755900 | 3.66864000  | 1.13768900  |
| C | 3.54350200  | 2.25434600  | -0.53481900 |
| C | 4.44685600  | 1.96384700  | 0.49847600  |
| C | 3.90222600  | 1.89816700  | -1.84383000 |
| C | 5.66929100  | 1.34217400  | 0.23688300  |
| H | 4.19043800  | 2.23122300  | 1.52103700  |
| C | 5.12406100  | 1.27935000  | -2.10998900 |
| H | 3.22099100  | 2.09858100  | -2.66592800 |
| C | 6.01432700  | 0.99884800  | -1.07086600 |
| H | 6.35419700  | 1.13489500  | 1.05524700  |
| H | 5.37964700  | 1.01506100  | -3.13270800 |
| H | 6.96700900  | 0.51987800  | -1.27992600 |



|   |             |             |             |
|---|-------------|-------------|-------------|
| C | 1.16498600  | -1.46416600 | 2.70794800  |
| C | 1.01838100  | -0.94298500 | 4.00433000  |
| C | 2.44790700  | -1.45154600 | 2.13502500  |
| C | 2.11161600  | -0.42218600 | 4.69963800  |
| H | 0.04559900  | -0.94830900 | 4.48808900  |
| C | 3.54160900  | -0.92985600 | 2.82731400  |
| H | 2.58697200  | -1.86669100 | 1.13987100  |
| C | 3.37863600  | -0.41037300 | 4.11362100  |
| H | 1.97127500  | -0.02995200 | 5.70381200  |
| H | 4.52168500  | -0.93364200 | 2.35832100  |
| H | 4.23023300  | -0.00992300 | 4.65740000  |
| C | -3.83182100 | -1.29037400 | 0.50293600  |
| C | -3.77990700 | -1.76949200 | -0.81508200 |
| C | -5.02446700 | -0.70265000 | 0.94858700  |
| C | -4.88882600 | -1.66949800 | -1.65493100 |
| H | -2.86135100 | -2.20398100 | -1.19685000 |
| C | -6.13696500 | -0.60144800 | 0.11041500  |
| H | -5.08414300 | -0.32357100 | 1.96672000  |
| C | -6.07316900 | -1.08688800 | -1.19652600 |
| H | -4.82450500 | -2.04532800 | -2.67278400 |
| H | -7.05200300 | -0.14632600 | 0.48117900  |
| H | -6.93658100 | -1.01192600 | -1.85231800 |
| H | -3.15939000 | -3.35410000 | 2.38575000  |
| H | -2.15519300 | -3.49329800 | 0.93991100  |
| H | -0.65452500 | -3.84543400 | 2.90354200  |
| H | -1.27428000 | -2.37475900 | 3.65187500  |
| H | 2.02681100  | 3.96054100  | -2.15641800 |
| H | 2.69608300  | 4.99855000  | -0.89880400 |
| H | 0.51134700  | 5.04715700  | 0.26756800  |
| H | 0.19641600  | 5.48842300  | -1.40930300 |
| H | -0.97378200 | 0.69298100  | 2.93828200  |
| H | -1.87903300 | 1.39694500  | 1.59486300  |
| H | 1.16778300  | 1.34871500  | 1.96413100  |
| H | 0.11741700  | 2.76873700  | 1.97537000  |

### Int2\_a

|    |             |             |             |
|----|-------------|-------------|-------------|
| C  | -1.11799000 | -1.03618800 | 1.80041700  |
| C  | -2.17646500 | 0.03488700  | 1.46607400  |
| Cu | -0.23069500 | 0.15307100  | -1.37514000 |
| C  | -3.74765900 | -0.78346300 | -0.99433400 |
| H  | -3.53100200 | -0.86495900 | -2.06729200 |
| C  | -3.50110700 | 1.90358200  | -0.35487000 |
| H  | -3.84326400 | 2.00995900  | 0.68286400  |

|   |              |              |              |
|---|--------------|--------------|--------------|
| C | 1. 41099500  | -2. 43650500 | 1. 29881700  |
| H | 0. 97093600  | -2. 77390400 | 2. 24728900  |
| C | 1. 64490000  | 0. 28907100  | 1. 74064800  |
| H | 2. 18467100  | 0. 78681300  | 0. 92737200  |
| P | -2. 36754200 | 0. 37806100  | -0. 36907300 |
| P | 0. 45643000  | -0. 87768800 | 0. 79391100  |
| C | 0. 98070600  | 0. 60567000  | -2. 93326700 |
| H | 0. 68203600  | 1. 58006900  | -3. 33215900 |
| H | 0. 80575000  | -0. 17322500 | -3. 68526700 |
| C | 2. 33266800  | 0. 54568600  | -2. 37894200 |
| C | 3. 12633300  | 1. 53444500  | -1. 86790800 |
| H | 2. 72655700  | -0. 46923300 | -2. 29831800 |
| C | 2. 67484500  | 2. 97845500  | -1. 87846900 |
| H | 3. 50513400  | 3. 65907400  | -2. 10660300 |
| H | 1. 89567100  | 3. 14140300  | -2. 62835200 |
| H | 2. 25665800  | 3. 30838500  | -0. 91312700 |
| C | 4. 41495800  | 1. 22124300  | -1. 21718900 |
| C | 4. 98084900  | 2. 09902700  | -0. 26489200 |
| C | 5. 15023400  | 0. 04499200  | -1. 49905000 |
| C | 6. 18158200  | 1. 80857000  | 0. 38357200  |
| H | 4. 46442900  | 3. 02140400  | -0. 01621900 |
| C | 6. 34518400  | -0. 24753500 | -0. 84798700 |
| H | 4. 79388100  | -0. 63500300 | -2. 26735900 |
| C | 6. 87392500  | 0. 62985300  | 0. 10439100  |
| H | 6. 57619500  | 2. 51193900  | 1. 11380200  |
| H | 6. 88019300  | -1. 16030300 | -1. 10158800 |
| H | 7. 81174400  | 0. 40441800  | 0. 60516100  |
| C | 2. 65032900  | -0. 63633500 | 2. 46434000  |
| C | 2. 82859200  | -1. 89686400 | 1. 60980600  |
| H | 3. 60010600  | -0. 11245600 | 2. 62111800  |
| H | 2. 27187300  | -0. 92776700 | 3. 45192700  |
| H | 3. 42450700  | -2. 66093300 | 2. 12307100  |
| H | 3. 35442600  | -1. 65079000 | 0. 67872000  |
| C | -4. 72296700 | 1. 47872300  | -1. 20695800 |
| C | -5. 05153900 | 0. 02584700  | -0. 84661600 |
| C | 0. 95872700  | 1. 35704700  | 2. 56431000  |
| C | 0. 57797700  | 1. 16407500  | 3. 90175700  |
| C | 0. 65053300  | 2. 59113000  | 1. 96612500  |
| C | -0. 08588900 | 2. 16658300  | 4. 61313000  |
| H | 0. 80715700  | 0. 22912500  | 4. 40450500  |
| C | -0. 01819000 | 3. 59202500  | 2. 67084300  |
| H | 0. 93943800  | 2. 76540000  | 0. 93282800  |
| C | -0. 39005100 | 3. 38374700  | 4. 00121700  |
| H | -0. 36283800 | 1. 99389600  | 5. 65015200  |

|   |             |             |             |
|---|-------------|-------------|-------------|
| H | -0.24602800 | 4.53231100  | 2.17656800  |
| H | -0.90503700 | 4.16296900  | 4.55680400  |
| C | 1.36179500  | -3.58830900 | 0.31804100  |
| C | 1.01402100  | -4.87160300 | 0.76317700  |
| C | 1.69060500  | -3.42211800 | -1.03707400 |
| C | 0.99848400  | -5.95994100 | -0.11253700 |
| H | 0.75707100  | -5.02152000 | 1.80971800  |
| C | 1.67431500  | -4.50568800 | -1.91479100 |
| H | 1.94812500  | -2.43476500 | -1.40927900 |
| C | 1.32801700  | -5.78029400 | -1.45688200 |
| H | 0.73130800  | -6.94645400 | 0.25808700  |
| H | 1.93266100  | -4.35365100 | -2.95957700 |
| H | 1.31844500  | -6.62404600 | -2.14173900 |
| C | -3.69949800 | -2.17962200 | -0.41164800 |
| C | -2.80665700 | -3.11522200 | -0.96210200 |
| C | -4.48486600 | -2.58046500 | 0.67916800  |
| C | -2.68958400 | -4.40048400 | -0.43550000 |
| H | -2.18944600 | -2.82628800 | -1.81038400 |
| C | -4.37650900 | -3.87118800 | 1.20441500  |
| H | -5.19774400 | -1.89212300 | 1.12323800  |
| C | -3.47718100 | -4.78454800 | 0.65327400  |
| H | -1.97987900 | -5.09662700 | -0.87239500 |
| H | -5.00058100 | -4.16057000 | 2.04614400  |
| H | -3.39308100 | -5.78695200 | 1.06423900  |
| C | -2.85643500 | 3.20675100  | -0.77620900 |
| C | -2.20506000 | 3.34118300  | -2.01258100 |
| C | -2.92920200 | 4.32778900  | 0.06242000  |
| C | -1.65048900 | 4.56161000  | -2.39843500 |
| H | -2.11148900 | 2.48144300  | -2.67059400 |
| C | -2.37402900 | 5.55108800  | -0.32072400 |
| H | -3.42874800 | 4.24227200  | 1.02513900  |
| C | -1.73287400 | 5.67186200  | -1.55445800 |
| H | -1.14686500 | 4.64230000  | -3.35797100 |
| H | -2.44666600 | 6.40821000  | 0.34397000  |
| H | -1.29841200 | 6.62111200  | -1.85582000 |
| H | -5.56799900 | 2.15320600  | -1.02542300 |
| H | -4.47559600 | 1.55559900  | -2.27368900 |
| H | -5.41457600 | -0.00903700 | 0.18810900  |
| H | -5.84446600 | -0.39045200 | -1.47998900 |
| H | -1.88044200 | 0.99511300  | 1.90535400  |
| H | -3.14095300 | -0.24065100 | 1.91041100  |
| H | -0.90675200 | -1.01815700 | 2.87641800  |
| H | -1.50826800 | -2.03262300 | 1.56148000  |

Int2\_a'

|    |             |             |             |
|----|-------------|-------------|-------------|
| C  | 1.11238800  | 1.35815100  | 1.77089700  |
| C  | 2.43750700  | 0.84159800  | 1.17604800  |
| Cu | 0.18708200  | -0.43652600 | -1.07124100 |
| C  | 2.88493700  | 2.11070700  | -1.54820300 |
| H  | 2.40889000  | 2.01605100  | -2.53263100 |
| C  | 4.03359400  | -0.34701400 | -0.97188900 |
| H  | 4.61689700  | -0.20001900 | -0.05326000 |
| C  | -1.80040100 | 1.52257700  | 1.87720600  |
| H  | -1.31570800 | 2.17754000  | 2.61395200  |
| C  | -0.73216100 | -0.98105700 | 2.37949600  |
| H  | -1.27403300 | -1.70402400 | 1.75731800  |
| P  | 2.35818600  | 0.49844300  | -0.66681200 |
| P  | -0.40884600 | 0.44799200  | 1.15344100  |
| C  | -0.77206100 | -1.75191200 | -2.27449600 |
| H  | -0.08680300 | -2.60828900 | -2.28716700 |
| H  | -0.83186600 | -1.32581500 | -3.28101600 |
| C  | -2.06328400 | -2.09722500 | -1.67923700 |
| C  | -3.30945300 | -1.62324700 | -1.97475200 |
| H  | -2.00313600 | -2.83997200 | -0.88079700 |
| C  | -3.50240900 | -0.65533400 | -3.12558900 |
| H  | -4.38746700 | -0.02446600 | -2.98171100 |
| H  | -2.63622700 | 0.00933600  | -3.22372300 |
| H  | -3.62588900 | -1.16228500 | -4.09517500 |
| C  | -4.50162900 | -2.07850200 | -1.23312900 |
| C  | -5.78518000 | -2.05244100 | -1.82270900 |
| C  | -4.43288500 | -2.55539900 | 0.09713600  |
| C  | -6.91901100 | -2.48722800 | -1.13677700 |
| H  | -5.89353100 | -1.70661200 | -2.84643100 |
| C  | -5.56305700 | -2.99612800 | 0.78020700  |
| H  | -3.47366000 | -2.56519300 | 0.60792800  |
| C  | -6.82086700 | -2.96568400 | 0.17062600  |
| H  | -7.88654300 | -2.45671700 | -1.63330700 |
| H  | -5.46349600 | -3.35345500 | 1.80314800  |
| H  | -7.70456400 | -3.30167300 | 0.70655800  |
| C  | -1.73153500 | -0.42139000 | 3.41265900  |
| C  | -2.68130600 | 0.51754300  | 2.65956300  |
| H  | -2.26656000 | -1.23557000 | 3.91658500  |
| H  | -1.20864300 | 0.14904300  | 4.19074000  |
| H  | -3.35859100 | 1.05165400  | 3.33636200  |
| H  | -3.30773800 | -0.05442500 | 1.96328800  |
| C  | 4.69241300  | 0.50815600  | -2.08243600 |
| C  | 4.40736300  | 1.97828000  | -1.75757300 |

|   |             |             |             |
|---|-------------|-------------|-------------|
| C | 0.51746600  | -1.66509400 | 2.88891000  |
| C | 1.14060600  | -1.31582100 | 4.09666000  |
| C | 1.10913900  | -2.67436000 | 2.10926800  |
| C | 2.31568300  | -1.95019100 | 4.50846600  |
| H | 0.70566900  | -0.55115700 | 4.73325400  |
| C | 2.28561900  | -3.30437700 | 2.51401900  |
| H | 0.64044900  | -2.96530900 | 1.17159100  |
| C | 2.89542700  | -2.94370300 | 3.71861000  |
| H | 2.77472400  | -1.66685700 | 5.45226400  |
| H | 2.72405300  | -4.07422400 | 1.88549600  |
| H | 3.80828700  | -3.43725400 | 4.04113200  |
| C | -2.54418100 | 2.39643900  | 0.89055400  |
| C | -2.65439300 | 3.77362500  | 1.12903900  |
| C | -3.16531100 | 1.86296300  | -0.25033200 |
| C | -3.36683400 | 4.60153200  | 0.25842500  |
| H | -2.18005200 | 4.20215600  | 2.00958200  |
| C | -3.87566000 | 2.68931400  | -1.12164500 |
| H | -3.09468100 | 0.79900100  | -0.46469900 |
| C | -3.97980200 | 4.06038700  | -0.87233600 |
| H | -3.44542600 | 5.66550200  | 0.46806800  |
| H | -4.34822800 | 2.25734900  | -1.99903200 |
| H | -4.53669400 | 4.69925700  | -1.55269900 |
| C | 2.36188500  | 3.37869900  | -0.90958400 |
| C | 1.06252200  | 3.81458900  | -1.22085200 |
| C | 3.10784400  | 4.13387700  | 0.00806300  |
| C | 0.52139600  | 4.95611300  | -0.63056200 |
| H | 0.46616900  | 3.24659900  | -1.93168300 |
| C | 2.57120300  | 5.28213700  | 0.59640700  |
| H | 4.12105600  | 3.83885700  | 0.26376700  |
| C | 1.27633000  | 5.69638900  | 0.28308100  |
| H | -0.49046800 | 5.26025000  | -0.88117000 |
| H | 3.17187100  | 5.85416900  | 1.29898900  |
| H | 0.86079500  | 6.58966800  | 0.74147900  |
| C | 3.97992900  | -1.83163200 | -1.26265900 |
| C | 3.21818200  | -2.34971100 | -2.32218900 |
| C | 4.73063200  | -2.72459900 | -0.48556900 |
| C | 3.21312600  | -3.71725600 | -2.59644700 |
| H | 2.60744700  | -1.68376600 | -2.92555900 |
| C | 4.72800800  | -4.09486700 | -0.75745500 |
| H | 5.32733100  | -2.34218800 | 0.33994400  |
| C | 3.96853600  | -4.59591500 | -1.81546100 |
| H | 2.61238300  | -4.09678100 | -3.41850200 |
| H | 5.32278500  | -4.76738100 | -0.14445200 |
| H | 3.96297100  | -5.66111800 | -2.03007500 |

|   |            |             |             |
|---|------------|-------------|-------------|
| H | 5.76637300 | 0.29620700  | -2.14203100 |
| H | 4.26010900 | 0.24722000  | -3.05705000 |
| H | 4.94964100 | 2.25166800  | -0.84406100 |
| H | 4.75222200 | 2.65374700  | -2.55006300 |
| H | 2.69955700 | -0.11976900 | 1.63369900  |
| H | 3.24826300 | 1.54339400  | 1.40784300  |
| H | 1.16835400 | 1.33847800  | 2.86633100  |
| H | 0.95633000 | 2.40197200  | 1.47279400  |

**Int2\_b**

|    |             |             |             |
|----|-------------|-------------|-------------|
| C  | 1.02910600  | 2.34638900  | 0.19288700  |
| C  | 2.11167600  | 1.65572600  | -0.66096500 |
| H  | 0.28312800  | 2.81298800  | -0.46174400 |
| H  | 1.48473100  | 3.14666000  | 0.78841700  |
| H  | 2.48388100  | 2.35085300  | -1.42344100 |
| H  | 2.96365400  | 1.38122300  | -0.02720800 |
| Cu | 0.11356800  | -1.01249700 | 0.15545700  |
| C  | 0.84367200  | 0.47629500  | -3.16399500 |
| H  | 0.14324900  | -0.34729300 | -3.35234000 |
| C  | 3.17765200  | -0.62929500 | -2.15057200 |
| H  | 3.89470400  | 0.20087800  | -2.10033700 |
| C  | -1.32083900 | 2.30168800  | 1.93126400  |
| H  | -0.97089100 | 3.32848800  | 1.75683500  |
| C  | 0.93614800  | 1.07542200  | 2.96794200  |
| H  | 0.68515800  | 0.06425400  | 3.31059800  |
| P  | 1.54952600  | 0.04527400  | -1.44155600 |
| P  | 0.04870700  | 1.16808100  | 1.27361000  |
| C  | -0.49515800 | -2.86013200 | 0.72033100  |
| H  | 0.42028700  | -3.28809300 | 1.14961200  |
| H  | -0.76891200 | -3.43111200 | -0.17179800 |
| C  | -1.54006300 | -2.75909800 | 1.74136300  |
| C  | -2.90912600 | -2.79966900 | 1.70919700  |
| H  | -1.13126300 | -2.61930600 | 2.74698100  |
| C  | -3.64984600 | -2.73400700 | 3.03488700  |
| H  | -4.43298300 | -1.96181000 | 3.04161800  |
| H  | -4.14653500 | -3.68214000 | 3.29061300  |
| H  | -2.95731400 | -2.51108000 | 3.85375100  |
| C  | -3.73715700 | -2.92967300 | 0.49587600  |
| C  | -3.25911000 | -2.63329200 | -0.80363400 |
| C  | -5.09549700 | -3.31955400 | 0.58700600  |
| C  | -4.07585100 | -2.74118400 | -1.92794700 |
| H  | -2.24292600 | -2.28217800 | -0.92759900 |
| C  | -5.90895800 | -3.43205800 | -0.53952900 |

|   |             |             |             |
|---|-------------|-------------|-------------|
| H | -5.52217300 | -3.55014900 | 1.55736300  |
| C | -5.40651900 | -3.14877000 | -1.81112000 |
| H | -3.66693300 | -2.49898800 | -2.90713500 |
| H | -6.94375100 | -3.74602400 | -0.42028400 |
| H | -6.03916900 | -3.23879700 | -2.69038000 |
| C | -1.28644500 | 2.06188800  | 3.45970400  |
| C | 0.18848600  | 2.07194200  | 3.88069300  |
| C | 2.85980200  | -0.87872700 | -3.64547200 |
| C | 2.02706900  | 0.30947300  | -4.13996800 |
| C | 3.77238400  | -1.81210800 | -1.41647900 |
| C | 5.09737200  | -1.75843300 | -0.96173500 |
| C | 3.04034100  | -2.98991400 | -1.19633700 |
| C | 5.68070400  | -2.84792000 | -0.31052200 |
| H | 5.68064700  | -0.85406600 | -1.12245300 |
| C | 3.61981200  | -4.07950000 | -0.54626600 |
| H | 2.00338300  | -3.05055200 | -1.51512400 |
| C | 4.94263500  | -4.01358200 | -0.10100900 |
| H | 6.71184400  | -2.78501000 | 0.02806100  |
| H | 3.03290500  | -4.97918600 | -0.38250900 |
| H | 5.39215800  | -4.86336900 | 0.40560600  |
| C | 0.05164300  | 1.76491400  | -3.21060300 |
| C | -1.30100100 | 1.74756100  | -2.82870200 |
| C | 0.61522900  | 2.99360400  | -3.58642600 |
| C | -2.06149400 | 2.91617300  | -2.80708600 |
| H | -1.76167500 | 0.80585900  | -2.53822000 |
| C | -0.14674800 | 4.16494400  | -3.57513700 |
| H | 1.65296100  | 3.04609000  | -3.90233600 |
| C | -1.48493200 | 4.13279400  | -3.18159000 |
| H | -3.09977300 | 2.87330100  | -2.49172400 |
| H | 0.31025000  | 5.10368000  | -3.87792700 |
| H | -2.07503400 | 5.04516000  | -3.17157500 |
| C | 2.44423400  | 1.16806600  | 2.89503000  |
| C | 3.14128600  | 2.38243700  | 2.99324200  |
| C | 3.19030700  | -0.00419700 | 2.68223300  |
| C | 4.53308500  | 2.42287500  | 2.87851000  |
| H | 2.60292900  | 3.30902200  | 3.17014800  |
| C | 4.57925100  | 0.03360900  | 2.56048000  |
| H | 2.67133100  | -0.95741500 | 2.60752600  |
| C | 5.25807000  | 1.25095700  | 2.65842200  |
| H | 5.05010600  | 3.37517700  | 2.96544000  |
| H | 5.12684200  | -0.88854700 | 2.38764200  |
| H | 6.34069300  | 1.28460100  | 2.57091200  |
| C | -2.68141000 | 2.15091100  | 1.28316700  |
| C | -3.29501500 | 0.89885700  | 1.11908900  |

|   |             |             |             |
|---|-------------|-------------|-------------|
| C | -3.37261100 | 3.29491500  | 0.85871600  |
| C | -4.56373300 | 0.79781000  | 0.54526700  |
| H | -2.78243700 | -0.00981600 | 1.42634300  |
| C | -4.64439600 | 3.19746900  | 0.28993600  |
| H | -2.91027200 | 4.27304300  | 0.97712700  |
| C | -5.24299000 | 1.94644100  | 0.13016600  |
| H | -5.01195700 | -0.18303000 | 0.41729500  |
| H | -5.16424000 | 4.09835800  | -0.02701300 |
| H | -6.23084000 | 1.86500600  | -0.31567900 |
| H | -1.74514600 | 1.09246900  | 3.69430700  |
| H | -1.87134500 | 2.82887500  | 3.98092200  |
| H | 0.32170000  | 1.80506900  | 4.93619700  |
| H | 0.58473800  | 3.08699100  | 3.75491400  |
| H | 3.78635900  | -1.00299000 | -4.21820100 |
| H | 2.28962900  | -1.81053600 | -3.75379400 |
| H | 1.66764500  | 0.16579400  | -5.16626200 |
| H | 2.65727400  | 1.20744500  | -4.14409500 |

#### Int2\_b'

|    |             |             |             |
|----|-------------|-------------|-------------|
| C  | -1.58025500 | 0.78412200  | 1.71273300  |
| C  | -0.86691600 | 2.06411300  | 1.23605700  |
| H  | -2.61641600 | 0.77886500  | 1.35319600  |
| H  | -1.61550900 | 0.76882900  | 2.80829500  |
| H  | -1.45673900 | 2.94619100  | 1.51383800  |
| H  | 0.10516000  | 2.15175400  | 1.73598500  |
| Cu | -0.03370700 | -0.22334400 | -1.21496000 |
| C  | -1.94646200 | 2.93990400  | -1.45939700 |
| H  | -1.90316500 | 2.53738900  | -2.47959000 |
| C  | 0.65482500  | 3.58242600  | -0.74813200 |
| H  | 0.58525900  | 4.10558000  | 0.21480900  |
| C  | -2.05450400 | -2.10244200 | 1.64156300  |
| H  | -2.63644200 | -1.62635700 | 2.44271300  |
| C  | 0.54138200  | -1.34518900 | 2.26516600  |
| H  | 1.26282300  | -1.84844700 | 1.61127000  |
| P  | -0.48063000 | 2.06664800  | -0.59882300 |
| P  | -0.82130100 | -0.79212800 | 1.03708100  |
| C  | 0.72448800  | -1.27289500 | -2.77862300 |
| H  | 1.68987900  | -0.82296900 | -3.02739700 |
| H  | 0.03191200  | -1.10825500 | -3.61285300 |
| C  | 0.76303300  | -2.69025800 | -2.41401600 |
| C  | 1.67069400  | -3.49615600 | -1.77431500 |
| H  | -0.14970100 | -3.21713500 | -2.70683600 |
| C  | 1.32029200  | -4.96904700 | -1.63686100 |



|   |              |              |              |
|---|--------------|--------------|--------------|
| H | 1. 98947000  | -5. 61944300 | -2. 22005900 |
| H | 1. 37730000  | -5. 32322000 | -0. 59648900 |
| H | 0. 30312200  | -5. 16065100 | -1. 99459500 |
| C | 2. 96696500  | -3. 07496100 | -1. 21640300 |
| C | 3. 35337000  | -1. 71961800 | -1. 06023700 |
| C | 3. 90414800  | -4. 03947500 | -0. 76809700 |
| C | 4. 58831500  | -1. 36390300 | -0. 51646800 |
| H | 2. 67717600  | -0. 93044700 | -1. 35644400 |
| C | 5. 13682300  | -3. 68159500 | -0. 22671400 |
| H | 3. 66935700  | -5. 09463800 | -0. 85390000 |
| C | 5. 49601500  | -2. 33852600 | -0. 09733900 |
| H | 4. 84050000  | -0. 30869600 | -0. 43049300 |
| H | 5. 82339600  | -4. 46226800 | 0. 09401800  |
| H | 6. 46037800  | -2. 05881100 | 0. 31891400  |
| C | -1. 14848400 | -3. 17079200 | 2. 29830600  |
| C | -0. 12035300 | -2. 42264200 | 3. 15412500  |
| C | -0. 03741500 | 4. 47239100  | -1. 81045000 |
| C | -1. 54435000 | 4. 42707400  | -1. 53301300 |
| C | 2. 11403800  | 3. 28262800  | -1. 01921900 |
| C | 3. 10504400  | 3. 83018800  | -0. 19263000 |
| C | 2. 51570500  | 2. 48629300  | -2. 10357500 |
| C | 4. 45960300  | 3. 59717300  | -0. 44120300 |
| H | 2. 81252700  | 4. 44817600  | 0. 65365300  |
| C | 3. 86767500  | 2. 25058800  | -2. 35416500 |
| H | 1. 76726000  | 2. 02782100  | -2. 74439600 |
| C | 4. 84556600  | 2. 80649400  | -1. 52446600 |
| H | 5. 21094800  | 4. 03580300  | 0. 21055600  |
| H | 4. 15673600  | 1. 62457800  | -3. 19373500 |
| H | 5. 89817500  | 2. 62230900  | -1. 72148300 |
| C | -3. 30312200 | 2. 58968200  | -0. 88842000 |
| C | -3. 93359100 | 1. 40527500  | -1. 30741500 |
| C | -3. 95349400 | 3. 37730100  | 0. 07340500  |
| C | -5. 16146900 | 1. 01228200  | -0. 77635900 |
| H | -3. 45007300 | 0. 78211700  | -2. 05679400 |
| C | -5. 18852200 | 2. 99094600  | 0. 60101900  |
| H | -3. 50586800 | 4. 30685300  | 0. 41197100  |
| C | -5. 79563600 | 1. 80651000  | 0. 18284200  |
| H | -5. 61710800 | 0. 08438600  | -1. 10967400 |
| H | -5. 67598300 | 3. 62207700  | 1. 33973600  |
| H | -6. 75554300 | 1. 50759600  | 0. 59514900  |
| C | 1. 26797700  | -0. 21904700 | 2. 96795600  |
| C | 0. 79710500  | 0. 36810700  | 4. 15375700  |
| C | 2. 45235100  | 0. 28689800  | 2. 40611400  |
| C | 1. 48023300  | 1. 42996600  | 4. 75061400  |

|   |             |             |             |
|---|-------------|-------------|-------------|
| H | -0.10555900 | -0.00603700 | 4.62860900  |
| C | 3.13303600  | 1.35166900  | 2.99770800  |
| H | 2.84731800  | -0.16885700 | 1.50131900  |
| C | 2.64847200  | 1.93028100  | 4.17318600  |
| H | 1.09830800  | 1.86328400  | 5.67161600  |
| H | 4.04430200  | 1.72416900  | 2.53793600  |
| H | 3.18015700  | 2.75548300  | 4.63952000  |
| C | -3.02081000 | -2.62401000 | 0.60163300  |
| C | -2.57044900 | -3.23826100 | -0.57782700 |
| C | -4.40263000 | -2.52611600 | 0.81561200  |
| C | -3.47771100 | -3.74068700 | -1.51040400 |
| H | -1.50461800 | -3.31281600 | -0.77487900 |
| C | -5.31347900 | -3.02946100 | -0.11650000 |
| H | -4.77004400 | -2.05488600 | 1.72488200  |
| C | -4.85322700 | -3.63895700 | -1.28444900 |
| H | -3.10784600 | -4.21206000 | -2.41726600 |
| H | -6.38074700 | -2.94897800 | 0.07450500  |
| H | -5.55817000 | -4.03312500 | -2.01158400 |
| H | -0.64034100 | -3.75794400 | 1.52272600  |
| H | -1.74917300 | -3.87110900 | 2.89078000  |
| H | 0.63997300  | -3.09527000 | 3.56867000  |
| H | -0.63580800 | -1.96022700 | 4.00481600  |
| H | 0.36166700  | 5.49282000  | -1.77353600 |
| H | 0.17238700  | 4.08285900  | -2.81511100 |
| H | -2.12424600 | 4.95099500  | -2.30281800 |
| H | -1.74557600 | 4.93224500  | -0.58015800 |

### Int2\_c

|    |             |             |             |
|----|-------------|-------------|-------------|
| Cu | 0.07070400  | -0.32003200 | -1.06696500 |
| C  | 1.43149300  | -0.62293400 | -4.56510000 |
| C  | 1.24007400  | -1.33266200 | -3.43067700 |
| C  | -0.01314900 | -1.59986400 | -2.69518000 |
| H  | 0.62516300  | -0.13420700 | -5.10480300 |
| H  | 2.42600800  | -0.51896400 | -4.99120800 |
| H  | 2.13413200  | -1.78767000 | -3.00414600 |
| P  | -1.03089500 | -0.48952000 | 1.15305500  |
| P  | 0.99198700  | 1.72515900  | -0.29751700 |
| C  | -0.70428100 | 1.17623000  | 1.95592300  |
| C  | 0.62271300  | 1.83832100  | 1.53516800  |
| C  | 0.23011700  | 3.27339600  | -1.12212200 |
| H  | 0.03857200  | 2.93081000  | -2.14638000 |
| C  | 2.76063700  | 2.41323600  | -0.37956900 |
| C  | -2.80229100 | -0.84109900 | 1.75679900  |

|   |             |             |             |
|---|-------------|-------------|-------------|
| C | -0.26494700 | -1.81964300 | 2.29667100  |
| H | -0.04620400 | -2.63491500 | 1.59679800  |
| C | -1.41475700 | -2.28499000 | 3.21503500  |
| C | -2.70406500 | -2.25064700 | 2.38817300  |
| H | -2.98358000 | -0.12686300 | 2.57122600  |
| C | 1.37567400  | 4.30601400  | -1.18605800 |
| C | 2.67387700  | 3.53343900  | -1.44388600 |
| H | 2.93314200  | 2.89514900  | 0.59222800  |
| C | -1.09164500 | 3.72078100  | -0.53690300 |
| C | -2.28149500 | 3.15073400  | -1.02067700 |
| C | -1.18726200 | 4.66841600  | 0.49396300  |
| C | -3.52147500 | 3.50397700  | -0.48907300 |
| H | -2.23244000 | 2.41833500  | -1.82349800 |
| C | -2.42826800 | 5.02924100  | 1.02453800  |
| H | -0.29225800 | 5.14216800  | 0.88624900  |
| C | -3.59971900 | 4.44733200  | 0.53856000  |
| H | -4.42260300 | 3.03795300  | -0.87645000 |
| H | -2.47623100 | 5.77100100  | 1.81772800  |
| H | -4.56419100 | 4.73022600  | 0.95155200  |
| C | 3.86105100  | 1.39937300  | -0.60532400 |
| C | 4.91216400  | 1.29376600  | 0.31613000  |
| C | 3.88018600  | 0.57224400  | -1.73974700 |
| C | 5.95976400  | 0.39226800  | 0.11334600  |
| H | 4.91213000  | 1.92673200  | 1.20111700  |
| C | 4.92542900  | -0.32932400 | -1.94278900 |
| H | 3.07083600  | 0.61281900  | -2.46443500 |
| C | 5.96966000  | -0.42337900 | -1.01882100 |
| H | 6.76763700  | 0.33219400  | 0.83836700  |
| H | 4.92141000  | -0.96096900 | -2.82721400 |
| H | 6.78304700  | -1.12551300 | -1.18136100 |
| C | 1.03665700  | -1.41785700 | 2.95508000  |
| C | 1.09671300  | -0.78244200 | 4.20564500  |
| C | 2.24591200  | -1.66188900 | 2.28180300  |
| C | 2.32083900  | -0.39746700 | 4.75803000  |
| H | 0.18636400  | -0.59101000 | 4.76631600  |
| C | 3.46906700  | -1.27169600 | 2.82697500  |
| H | 2.21988500  | -2.16780700 | 1.32004100  |
| C | 3.51159500  | -0.63515500 | 4.07001000  |
| H | 2.34087000  | 0.08639000  | 5.73137600  |
| H | 4.38618500  | -1.46376000 | 2.27752400  |
| H | 4.46292100  | -0.33513000 | 4.50123600  |
| C | -3.90119300 | -0.67322200 | 0.73153100  |
| C | -3.94072300 | -1.45173100 | -0.43594600 |
| C | -4.93097400 | 0.25225700  | 0.94979300  |

|   |             |             |             |
|---|-------------|-------------|-------------|
| C | -4.98150600 | -1.30779600 | -1.35326800 |
| H | -3.14898100 | -2.16959100 | -0.63338800 |
| C | -5.97508800 | 0.39784000  | 0.03281400  |
| H | -4.91814700 | 0.86216200  | 1.85065700  |
| C | -6.00331600 | -0.38229000 | -1.12363600 |
| H | -4.99340900 | -1.91985800 | -2.25131800 |
| H | -6.76730000 | 1.11666900  | 0.22706500  |
| H | -6.81430600 | -0.27362600 | -1.83879200 |
| C | -0.04444000 | -2.89415100 | -1.94716500 |
| C | 1.07757100  | -3.38262600 | -1.22340700 |
| C | -1.20733300 | -3.70034800 | -1.88146900 |
| C | 1.02533200  | -4.55266500 | -0.47109700 |
| H | 2.00743700  | -2.81924600 | -1.23768000 |
| C | -1.26266800 | -4.86687600 | -1.11421000 |
| H | -2.08456300 | -3.41859100 | -2.45417400 |
| C | -0.15253000 | -5.30632300 | -0.39264500 |
| H | 1.91598500  | -4.88095900 | 0.06158000  |
| H | -2.18292000 | -5.44824000 | -1.10202500 |
| H | -0.19222500 | -6.21955800 | 0.19469800  |
| C | -1.27202500 | -1.26836400 | -3.49819200 |
| H | -1.21131400 | -0.25546600 | -3.91167500 |
| H | -1.41668700 | -1.95199400 | -4.35442100 |
| H | -2.18099700 | -1.30264500 | -2.88863700 |
| H | -2.66439400 | -3.01369500 | 1.60078100  |
| H | -3.59275700 | -2.45845500 | 2.99604200  |
| H | -1.52512200 | -1.61236100 | 4.07457800  |
| H | -1.20663400 | -3.28503000 | 3.61428200  |
| H | 3.55811400  | 4.17935400  | -1.39026500 |
| H | 2.65875300  | 3.09223100  | -2.44862200 |
| H | 1.17760300  | 5.05547600  | -1.96188500 |
| H | 1.46593800  | 4.84568600  | -0.23539000 |
| H | 0.63688800  | 2.88300500  | 1.87002000  |
| H | 1.46189200  | 1.32996400  | 2.02479900  |
| H | -1.54615900 | 1.80729300  | 1.64697900  |
| H | -0.74250700 | 1.09831300  | 3.04928800  |

### Int2\_c'

|    |             |             |             |
|----|-------------|-------------|-------------|
| Cu | -0.00200500 | -0.35783000 | -1.08355900 |
| C  | 2.11817400  | -2.13245000 | -3.82616900 |
| C  | 0.98853200  | -1.45145000 | -3.54017800 |
| C  | -0.14017700 | -1.73567400 | -2.61743600 |
| H  | 2.37123900  | -3.08217900 | -3.36537100 |
| H  | 2.81774400  | -1.74898100 | -4.56486400 |

|   |             |             |             |
|---|-------------|-------------|-------------|
| H | 0.83594800  | -0.52748500 | -4.10678600 |
| P | -1.02999800 | -0.40200100 | 1.17349100  |
| P | 0.94164600  | 1.72957400  | -0.44319200 |
| C | -0.73889500 | 1.32412000  | 1.85180700  |
| C | 0.57112000  | 1.98145100  | 1.37534000  |
| C | 0.18636300  | 3.20554200  | -1.39518100 |
| H | -0.02329600 | 2.77284500  | -2.38113700 |
| C | 2.70789800  | 2.40629400  | -0.57190700 |
| C | -2.77226000 | -0.76994200 | 1.85265900  |
| C | -0.19004100 | -1.62661600 | 2.38312800  |
| H | 0.04380500  | -2.47662000 | 1.73119100  |
| C | -1.30087900 | -2.07395700 | 3.35655600  |
| C | -2.60985500 | -2.13401300 | 2.56329000  |
| H | -2.94886900 | -0.01393300 | 2.62975900  |
| C | 1.34080300  | 4.21581000  | -1.57029300 |
| C | 2.63158000  | 3.40796300  | -1.74979000 |
| H | 2.86504500  | 2.99331000  | 0.34337100  |
| C | -1.12359200 | 3.71459800  | -0.83428100 |
| C | -2.32320500 | 3.10682400  | -1.24233700 |
| C | -1.19832600 | 4.75059600  | 0.10944600  |
| C | -3.55238900 | 3.50995200  | -0.72118100 |
| H | -2.28955000 | 2.30354900  | -1.97508500 |
| C | -2.42854700 | 5.16137200  | 0.62872000  |
| H | -0.29486200 | 5.25380600  | 0.44097800  |
| C | -3.60984800 | 4.54163500  | 0.21926200  |
| H | -4.46138300 | 3.01333100  | -1.04785900 |
| H | -2.46044200 | 5.97101800  | 1.35334700  |
| H | -4.56582900 | 4.86296000  | 0.62380300  |
| C | 3.82258100  | 1.38579000  | -0.67183300 |
| C | 4.96336700  | 1.52973500  | 0.13105200  |
| C | 3.77403500  | 0.31420600  | -1.57624600 |
| C | 6.03075200  | 0.63452400  | 0.03242200  |
| H | 5.01757800  | 2.35383600  | 0.83968000  |
| C | 4.83682900  | -0.58450800 | -1.67299200 |
| H | 2.89950300  | 0.15273000  | -2.20021700 |
| C | 5.97041600  | -0.42794600 | -0.87134900 |
| H | 6.90705400  | 0.76879700  | 0.66177000  |
| H | 4.76444700  | -1.40908900 | -2.37678800 |
| H | 6.79804400  | -1.12810000 | -0.94938500 |
| C | 1.10985600  | -1.13882800 | 2.98503600  |
| C | 1.17321700  | -0.42938700 | 4.19483000  |
| C | 2.31227300  | -1.37939000 | 2.29845100  |
| C | 2.39449100  | 0.02873300  | 4.69555100  |
| H | 0.26847700  | -0.23579100 | 4.76376900  |

|   |             |             |             |
|---|-------------|-------------|-------------|
| C | 3.53206100  | -0.91607400 | 2.79112600  |
| H | 2.28412000  | -1.93837100 | 1.36665100  |
| C | 3.57795800  | -0.20792900 | 3.99474800  |
| H | 2.41791200  | 0.56959400  | 5.63835100  |
| H | 4.44326900  | -1.10605800 | 2.23140000  |
| H | 4.52693700  | 0.14980600  | 4.38515600  |
| C | -3.90714100 | -0.68822300 | 0.85676400  |
| C | -4.01357700 | -1.58680000 | -0.21676300 |
| C | -4.90375600 | 0.28603100  | 1.00890000  |
| C | -5.08674400 | -1.51241600 | -1.10486400 |
| H | -3.24979300 | -2.34518000 | -0.36694700 |
| C | -5.97862500 | 0.36366100  | 0.11997400  |
| H | -4.84029800 | 0.98903300  | 1.83680800  |
| C | -6.07416100 | -0.53714600 | -0.94127400 |
| H | -5.14992000 | -2.21792100 | -1.92913800 |
| H | -6.74352700 | 1.12282800  | 0.26360800  |
| H | -6.91023300 | -0.48309100 | -1.63334200 |
| C | -0.08791600 | -2.99589400 | -1.81756600 |
| C | 1.07253300  | -3.36508700 | -1.08715900 |
| C | -1.20101000 | -3.85781400 | -1.68114300 |
| C | 1.10565200  | -4.49101800 | -0.26890200 |
| H | 1.95713500  | -2.73837300 | -1.16212700 |
| C | -1.17097600 | -4.98240300 | -0.85087100 |
| H | -2.10684700 | -3.65160600 | -2.24155800 |
| C | -0.02183100 | -5.31112400 | -0.13206800 |
| H | 2.02086300  | -4.73303800 | 0.26822500  |
| H | -2.05391800 | -5.61526600 | -0.78211100 |
| H | 0.00503600  | -6.19123500 | 0.50483200  |
| C | -1.47543700 | -1.48559600 | -3.34187000 |
| H | -1.44102000 | -0.53255300 | -3.88433900 |
| H | -1.69958300 | -2.26704800 | -4.09112300 |
| H | -2.32980400 | -1.43490700 | -2.65794200 |
| H | -2.56070200 | -2.94278900 | 1.82382500  |
| H | -3.47557000 | -2.33483500 | 3.20567400  |
| H | -1.41473800 | -1.35496700 | 4.17726400  |
| H | -1.04757600 | -3.04011000 | 3.80947400  |
| H | 3.52197900  | 4.04737200  | -1.76631000 |
| H | 2.61117600  | 2.86086400  | -2.70148700 |
| H | 1.14537800  | 4.88325700  | -2.41827200 |
| H | 1.44044800  | 4.84904500  | -0.68012900 |
| H | 0.56447700  | 3.04899400  | 1.62775600  |
| H | 1.42164000  | 1.52840700  | 1.89816400  |
| H | -1.59763800 | 1.91217200  | 1.50555700  |
| H | -0.76824400 | 1.32251400  | 2.94815700  |

**Int2\_d**

|    |             |             |             |
|----|-------------|-------------|-------------|
| Cu | 0.05400300  | -0.29203000 | -0.96803700 |
| C  | -1.58076300 | 0.14165800  | -4.06377500 |
| C  | -1.41675000 | -0.75739400 | -3.06113200 |
| C  | -0.19607500 | -1.46606000 | -2.64751600 |
| H  | -0.78726600 | 0.39964300  | -4.75983800 |
| H  | -2.53536700 | 0.63941500  | -4.21235400 |
| H  | -2.29822500 | -0.94930100 | -2.44657100 |
| P  | 1.18514600  | 1.66219900  | -0.24161700 |
| P  | -0.96135400 | -0.40123900 | 1.25812300  |
| C  | 0.87723800  | 1.79562200  | 1.60435100  |
| C  | -0.47335800 | 1.21943700  | 2.07205300  |
| C  | -0.23594600 | -1.79019700 | 2.34950700  |
| H  | -0.21545100 | -2.64453400 | 1.66093900  |
| C  | -2.72004800 | -0.62245100 | 1.97078700  |
| C  | 3.00141000  | 2.22455300  | -0.34085400 |
| C  | 0.53009100  | 3.27175700  | -1.02571800 |
| C  | 1.71204400  | 4.25900900  | -0.96740700 |
| H  | 1.56228700  | 5.08922000  | -1.66841900 |
| C  | 2.97673500  | 3.45424300  | -1.28466500 |
| H  | 3.24750900  | 2.58643900  | 0.66599600  |
| H  | 2.95357500  | 3.11719000  | -2.32897500 |
| H  | 3.89084000  | 4.04661100  | -1.16046400 |
| C  | -1.31151600 | -2.07305200 | 3.41588200  |
| C  | -2.66906800 | -1.98025000 | 2.71350000  |
| H  | -2.82084600 | 0.16603500  | 2.72806700  |
| C  | 1.18042600  | -1.54592300 | 2.82086500  |
| C  | 2.24857000  | -1.89490600 | 1.97652200  |
| C  | 1.48252400  | -0.96027900 | 4.05998100  |
| C  | 3.57068400  | -1.65202900 | 2.34733100  |
| H  | 2.03283800  | -2.36601000 | 1.02055900  |
| C  | 2.80707700  | -0.72257900 | 4.43719800  |
| H  | 0.68555500  | -0.69447900 | 4.74819600  |
| C  | 3.85586200  | -1.06194400 | 3.58157400  |
| H  | 4.37657300  | -1.92202000 | 1.67111000  |
| H  | 3.01623900  | -0.27473700 | 5.40550400  |
| H  | 4.88537900  | -0.87729600 | 3.87651700  |
| C  | -3.86659300 | -0.48061700 | 0.99420400  |
| C  | -4.81861500 | 0.53244700  | 1.17278200  |
| C  | -4.03349100 | -1.36958600 | -0.07938300 |
| C  | -5.90914600 | 0.65718000  | 0.30858300  |
| H  | -4.70689900 | 1.22964200  | 2.00046100  |

|   |             |             |             |
|---|-------------|-------------|-------------|
| C | -5.12145600 | -1.24731100 | -0.94352500 |
| H | -3.30552100 | -2.15805600 | -0.25219500 |
| C | -6.06481800 | -0.23396100 | -0.75357400 |
| H | -6.63824200 | 1.44706800  | 0.47108900  |
| H | -5.23075200 | -1.94501000 | -1.76964300 |
| H | -6.91262600 | -0.14202700 | -1.42708700 |
| C | -0.81206900 | 3.72974100  | -0.49883000 |
| C | -0.94148200 | 4.65085400  | 0.55183700  |
| C | -1.98388000 | 3.19623500  | -1.06352600 |
| C | -2.20155000 | 5.02172300  | 1.02857200  |
| H | -0.05866100 | 5.09695700  | 1.00060300  |
| C | -3.24176400 | 3.56060600  | -0.58355400 |
| H | -1.90660700 | 2.48734800  | -1.88592400 |
| C | -3.35599000 | 4.47557700  | 0.46649200  |
| H | -2.27737000 | 5.74319600  | 1.83824100  |
| H | -4.13171100 | 3.12630000  | -1.02967700 |
| H | -4.33553600 | 4.76598100  | 0.83688200  |
| C | 4.01462900  | 1.16667600  | -0.72162900 |
| C | 3.87836200  | 0.40419400  | -1.89192600 |
| C | 5.14754700  | 0.96137000  | 0.07755000  |
| C | 4.84720000  | -0.53237300 | -2.25169700 |
| H | 3.00206100  | 0.53182100  | -2.52092200 |
| C | 6.12129000  | 0.02599700  | -0.28060500 |
| H | 5.27035300  | 1.54225100  | 0.98915800  |
| C | 5.97391700  | -0.72487500 | -1.44770400 |
| H | 4.71897900  | -1.11366400 | -3.16084400 |
| H | 6.99444500  | -0.11249000 | 0.35197600  |
| H | 6.72904900  | -1.45368800 | -1.72958900 |
| C | -0.37385500 | -2.82510300 | -2.05159000 |
| C | 0.72004900  | -3.51426000 | -1.46703300 |
| C | -1.61519000 | -3.50355900 | -2.01507400 |
| C | 0.57265900  | -4.75013400 | -0.84411000 |
| H | 1.70343300  | -3.04927500 | -1.48515700 |
| C | -1.76803700 | -4.73621900 | -1.37414000 |
| H | -2.47228000 | -3.06820400 | -2.51935400 |
| C | -0.68112800 | -5.37052500 | -0.77215200 |
| H | 1.44379100  | -5.23417600 | -0.40653900 |
| H | -2.74524600 | -5.21589000 | -1.37273300 |
| H | -0.79738200 | -6.33461200 | -0.28440500 |
| C | 0.96264700  | -1.35063000 | -3.64080800 |
| H | 0.72059100  | -1.83808800 | -4.60219200 |
| H | 1.19321500  | -0.30225800 | -3.86812800 |
| H | 1.88155900  | -1.81009600 | -3.26501500 |
| H | 1.80595200  | 4.69709200  | 0.03424400  |



|   |             |             |             |
|---|-------------|-------------|-------------|
| H | 0.39146200  | 2.98678700  | -2.07629800 |
| H | -3.50780600 | -2.06041900 | 3.41519000  |
| H | -2.77139900 | -2.80234900 | 1.99464200  |
| H | -1.15179800 | -3.05419300 | 3.87967600  |
| H | -1.26993500 | -1.32650900 | 4.21911800  |
| H | 0.97017400  | 2.83716200  | 1.93714500  |
| H | 1.69734700  | 1.23488500  | 2.06802900  |
| H | -1.27986200 | 1.91614300  | 1.81388700  |
| H | -0.46964200 | 1.12070100  | 3.16471800  |

**Int2\_d'**

|    |             |             |             |
|----|-------------|-------------|-------------|
| Cu | -0.06205600 | -0.37495800 | -0.98859600 |
| C  | -1.62247200 | -3.09789400 | -3.35627300 |
| C  | -0.97169900 | -1.91960100 | -3.25686900 |
| C  | 0.33010200  | -1.53537000 | -2.65356300 |
| H  | -1.23638700 | -4.03184000 | -2.96170900 |
| H  | -2.57204000 | -3.15403100 | -3.88337600 |
| H  | -1.46397200 | -1.07154100 | -3.74259400 |
| P  | 0.72092800  | 1.84820200  | -0.21709100 |
| P  | -1.10860500 | -0.57631700 | 1.15341900  |
| C  | 0.24377200  | 1.91446000  | 1.60110000  |
| C  | -1.01172700 | 1.10416000  | 1.97346400  |
| C  | -0.21571800 | -1.82459500 | 2.29040500  |
| H  | 0.09579000  | -2.60283300 | 1.58416600  |
| C  | -2.83552800 | -1.14961300 | 1.69559900  |
| C  | 2.36968400  | 2.82418500  | -0.14754900 |
| C  | -0.21563400 | 3.30654400  | -1.01259700 |
| C  | 0.65857800  | 4.54221300  | -0.73603900 |
| H  | 0.37007000  | 5.38408100  | -1.37791700 |
| C  | 2.11077500  | 4.11388000  | -0.96669700 |
| H  | 2.47751900  | 3.11262400  | 0.90543600  |
| H  | 2.26951000  | 3.91611200  | -2.03373300 |
| H  | 2.82493500  | 4.89488800  | -0.68001800 |
| C  | -1.31880100 | -2.42582400 | 3.18762600  |
| C  | -2.58485300 | -2.53960100 | 2.33122600  |
| H  | -3.12402200 | -0.46921600 | 2.50845900  |
| C  | 1.03379200  | -1.30006800 | 2.96316100  |
| C  | 2.27220800  | -1.45344600 | 2.31593200  |
| C  | 1.01153300  | -0.64299100 | 4.20376700  |
| C  | 3.44510100  | -0.95380900 | 2.88295800  |
| H  | 2.31763200  | -1.97757600 | 1.36406800  |
| C  | 2.18602300  | -0.14709600 | 4.77478600  |
| H  | 0.07485600  | -0.52188500 | 4.74075800  |

|   |             |             |             |
|---|-------------|-------------|-------------|
| C | 3.40737000  | -0.29626500 | 4.11512900  |
| H | 4.38791000  | -1.08383300 | 2.35915700  |
| H | 2.14444600  | 0.35180500  | 5.73979800  |
| H | 4.32122500  | 0.08614500  | 4.56222900  |
| C | -3.93171900 | -1.12252800 | 0.65115900  |
| C | -5.18603400 | -0.58953300 | 0.98332900  |
| C | -3.75416200 | -1.66025100 | -0.63245000 |
| C | -6.23785600 | -0.59541400 | 0.06510800  |
| H | -5.34134100 | -0.16729000 | 1.97418800  |
| C | -4.80270100 | -1.66375400 | -1.55312000 |
| H | -2.79273100 | -2.06319300 | -0.93868200 |
| C | -6.04889200 | -1.13334800 | -1.20952300 |
| H | -7.20229000 | -0.17992600 | 0.34651600  |
| H | -4.63360700 | -2.08280200 | -2.54110100 |
| H | -6.86458200 | -1.13995600 | -1.92783800 |
| C | -1.68420800 | 3.37141300  | -0.65151900 |
| C | -2.20557000 | 4.30946100  | 0.25040300  |
| C | -2.56883600 | 2.44144700  | -1.22599700 |
| C | -3.56619700 | 4.31233400  | 0.57372900  |
| H | -1.55733000 | 5.05513600  | 0.70038800  |
| C | -3.92361700 | 2.43621600  | -0.89938800 |
| H | -2.18412100 | 1.70526800  | -1.92911600 |
| C | -4.42830500 | 3.37494300  | 0.00557100  |
| H | -3.94876600 | 5.05387400  | 1.27061200  |
| H | -4.58147000 | 1.69573600  | -1.34444800 |
| H | -5.48445000 | 3.37494600  | 0.26061100  |
| C | 3.61142400  | 2.05912200  | -0.54991700 |
| C | 3.82204000  | 1.63927400  | -1.87210600 |
| C | 4.60113100  | 1.77326400  | 0.40069400  |
| C | 4.98423300  | 0.95795500  | -2.23244100 |
| H | 3.06744100  | 1.83801200  | -2.62825300 |
| C | 5.76685600  | 1.09152400  | 0.04422600  |
| H | 4.45720800  | 2.08782000  | 1.43192200  |
| C | 5.96345100  | 0.68222300  | -1.27496300 |
| H | 5.12374200  | 0.64152700  | -3.26264700 |
| H | 6.52281600  | 0.88615600  | 0.79792400  |
| H | 6.86987000  | 0.15299100  | -1.55585300 |
| C | 1.13636300  | -2.58294700 | -1.95682700 |
| C | 2.54801200  | -2.63933300 | -2.05406600 |
| C | 0.54307500  | -3.54664500 | -1.09682200 |
| C | 3.30538800  | -3.57031100 | -1.33977000 |
| H | 3.06895100  | -1.93844800 | -2.69641100 |
| C | 1.29822200  | -4.48190000 | -0.39453300 |
| H | -0.53519900 | -3.54559700 | -0.97450200 |

|   |             |             |             |
|---|-------------|-------------|-------------|
| C | 2.69390200  | -4.50419100 | -0.50321400 |
| H | 4.38790900  | -3.56800600 | -1.45163600 |
| H | 0.79170300  | -5.20497900 | 0.24243000  |
| H | 3.28323900  | -5.23647100 | 0.04202600  |
| C | 1.12219600  | -0.67970700 | -3.65886000 |
| H | 1.52638400  | -1.28143700 | -4.49318700 |
| H | 0.47091100  | 0.08351700  | -4.10315200 |
| H | 1.96583200  | -0.15537500 | -3.19843500 |
| H | 0.54070100  | 4.87589400  | 0.30293500  |
| H | -0.14707200 | 3.08744900  | -2.08715000 |
| H | -3.45735400 | -2.85370000 | 2.91621800  |
| H | -2.44240000 | -3.28709800 | 1.54007800  |
| H | -1.00105700 | -3.39555200 | 3.58960300  |
| H | -1.52392800 | -1.77475400 | 4.04674200  |
| H | 0.12208500  | 2.95532700  | 1.92757300  |
| H | 1.11155200  | 1.50847200  | 2.13423700  |
| H | -1.91100600 | 1.63383300  | 1.63812800  |
| H | -1.07853900 | 1.00973700  | 3.06432300  |

**TS2\_ac**

|    |             |             |             |
|----|-------------|-------------|-------------|
| C  | 0.19759500  | -2.26930400 | 0.85833500  |
| C  | 1.41679100  | -1.53909100 | 1.45105800  |
| Cu | -0.04895600 | 0.82065500  | -0.53454600 |
| C  | 3.09059600  | 0.76262300  | 2.01930200  |
| C  | 0.51024500  | 0.86730700  | 3.02141000  |
| C  | -1.99468300 | -2.55091200 | -1.05262500 |
| P  | 1.33325600  | 0.33723900  | 1.38456700  |
| P  | -0.44017200 | -1.51623900 | -0.73153200 |
| C  | 1.27679200  | 1.79286000  | -3.07905600 |
| H  | 2.09979100  | 2.34703000  | -2.63834500 |
| H  | 1.51569400  | 1.15799900  | -3.92782700 |
| C  | -0.01167900 | 1.89617200  | -2.63317900 |
| C  | -0.53199800 | 2.62182100  | -1.47550900 |
| H  | -0.74906900 | 1.30576300  | -3.18126200 |
| C  | 0.38110800  | 3.72661000  | -0.93814100 |
| H  | 0.44834600  | 4.57205100  | -1.64610900 |
| H  | 1.40016100  | 3.36273200  | -0.77514000 |
| H  | 0.02651700  | 4.13045800  | 0.01541300  |
| C  | -1.98487900 | 2.95779100  | -1.46316200 |
| C  | -2.60255700 | 3.45641200  | -0.29036600 |
| C  | -2.81928800 | 2.84480100  | -2.59846400 |
| C  | -3.94993800 | 3.79941300  | -0.24848100 |
| H  | -2.00616200 | 3.56196700  | 0.61300600  |

|   |             |             |             |
|---|-------------|-------------|-------------|
| C | -4.17722500 | 3.17153800  | -2.55487200 |
| H | -2.39487700 | 2.52664500  | -3.54593800 |
| C | -4.75920600 | 3.65356400  | -1.38188800 |
| H | -4.37618000 | 4.17859100  | 0.67818300  |
| H | -4.77592400 | 3.07241800  | -3.45828900 |
| H | -5.81115800 | 3.92549600  | -1.35262300 |
| C | 0.51194100  | -2.29633900 | -2.19964100 |
| C | -1.88006600 | -2.90081700 | -2.55498200 |
| C | -0.43789000 | -3.36130100 | -2.79669300 |
| C | 2.85356200  | 1.58383100  | 3.30944700  |
| C | 1.65856800  | 0.96517100  | 4.04285800  |
| H | -2.61071900 | -3.67204600 | -2.82582600 |
| H | -2.10925500 | -2.01471200 | -3.16183200 |
| H | -0.28883600 | -4.33022500 | -2.30540900 |
| H | -0.22318000 | -3.51001600 | -3.86176500 |
| H | 1.35813900  | 1.55610900  | 4.91690600  |
| H | 1.93990800  | -0.02992600 | 4.41009300  |
| H | 2.63063400  | 2.62791000  | 3.05692700  |
| H | 3.76026000  | 1.59262400  | 3.92596200  |
| H | 0.17330400  | 1.88942600  | 2.80410300  |
| H | 3.51593800  | -0.20408000 | 2.31807600  |
| C | -0.71040100 | 0.05060400  | 3.38852600  |
| C | -1.92636200 | 0.30955500  | 2.73136300  |
| C | -0.67687400 | -0.98328300 | 4.33537000  |
| C | -3.06447700 | -0.45079500 | 2.99578400  |
| H | -1.97759300 | 1.10953700  | 1.99573600  |
| C | -1.82018900 | -1.73930800 | 4.61113700  |
| H | 0.23974400  | -1.20151600 | 4.87502300  |
| C | -3.01505600 | -1.48084100 | 3.93942500  |
| H | -3.98495500 | -0.24329800 | 2.45847200  |
| H | -1.77201800 | -2.53080200 | 5.35489300  |
| H | -3.90174900 | -2.07281000 | 4.14908000  |
| C | 4.03284300  | 1.39098000  | 1.01641900  |
| C | 3.85391200  | 2.70238300  | 0.54937800  |
| C | 5.13648800  | 0.66640800  | 0.54429800  |
| C | 4.74662400  | 3.26794000  | -0.36113500 |
| H | 3.00709300  | 3.28952800  | 0.89299300  |
| C | 6.03351100  | 1.22940800  | -0.36608300 |
| H | 5.29647300  | -0.35073300 | 0.89492900  |
| C | 5.84134100  | 2.53351800  | -0.82328300 |
| H | 4.58499100  | 4.28429000  | -0.70996200 |
| H | 6.88579200  | 0.64959900  | -0.71155300 |
| H | 6.53754900  | 2.97532100  | -1.53086100 |
| C | 1.93108000  | -2.73008100 | -1.90099100 |

|   |             |             |             |
|---|-------------|-------------|-------------|
| C | 2.24448200  | -3.98783400 | -1.36026800 |
| C | 2.98764200  | -1.83870800 | -2.15370100 |
| C | 3.56637300  | -4.34142300 | -1.08119000 |
| H | 1.45636100  | -4.70843900 | -1.16074400 |
| C | 4.30890100  | -2.18936500 | -1.87378600 |
| H | 2.76562800  | -0.85749200 | -2.56687800 |
| C | 4.60494700  | -3.44394000 | -1.33577400 |
| H | 3.78321700  | -5.32359700 | -0.66882100 |
| H | 5.10454300  | -1.47857700 | -2.07868400 |
| H | 5.63378600  | -3.72254100 | -1.12364300 |
| C | -3.32225500 | -1.95753900 | -0.63370700 |
| C | -3.70947900 | -0.65901100 | -0.99766800 |
| C | -4.22378300 | -2.74117000 | 0.10179400  |
| C | -4.96298400 | -0.16120300 | -0.63836100 |
| H | -3.02759300 | -0.01819200 | -1.54937600 |
| C | -5.47993900 | -2.24879300 | 0.45975900  |
| H | -3.93951800 | -3.75028600 | 0.39347500  |
| C | -5.85330100 | -0.95524300 | 0.08976000  |
| H | -5.23156800 | 0.85140000  | -0.92426300 |
| H | -6.16406600 | -2.87588900 | 1.02612100  |
| H | -6.83033900 | -0.56744900 | 0.36653700  |
| H | -1.84743000 | -3.48434600 | -0.49151100 |
| H | 0.56930200  | -1.46097200 | -2.90615600 |
| H | 2.31267300  | -1.79696600 | 0.87375300  |
| H | 1.58572600  | -1.87855200 | 2.48079400  |
| H | -0.64740300 | -2.21335200 | 1.55479500  |
| H | 0.43649300  | -3.33053100 | 0.71934600  |

### TS2\_ad

|    |             |             |             |
|----|-------------|-------------|-------------|
| C  | -0.75634900 | 1.11636200  | 1.94147000  |
| C  | 0.53703800  | 1.83633500  | 1.51546500  |
| Cu | 0.04427400  | -0.23052400 | -1.05356900 |
| C  | 0.02266200  | 3.37687600  | -1.06970400 |
| H  | -0.17432500 | 3.06197600  | -2.10110100 |
| C  | 2.59903800  | 2.62248400  | -0.38148300 |
| H  | 2.73342400  | 3.08020700  | 0.60794000  |
| C  | -0.20576900 | -1.84749600 | 2.20134800  |
| H  | -0.04532100 | -2.68254400 | 1.50780200  |
| P  | 0.86839900  | 1.82708000  | -0.32901200 |
| P  | -1.03958200 | -0.53399500 | 1.09203800  |
| C  | -1.21532000 | -0.01928400 | -3.56906700 |
| H  | -0.46250300 | 0.50932500  | -4.14704600 |
| H  | -2.23675900 | 0.33834300  | -3.65209600 |

|   |             |             |             |
|---|-------------|-------------|-------------|
| C | -0.94133900 | -1.15310200 | -2.84078300 |
| C | 0.34053900  | -1.75555100 | -2.52114900 |
| H | -1.81174600 | -1.60146000 | -2.36398100 |
| C | 1.50683500  | -1.41777600 | -3.44375400 |
| H | 1.47071100  | -2.01339000 | -4.37298400 |
| H | 1.49193500  | -0.36400000 | -3.74260700 |
| H | 2.48153900  | -1.59841900 | -2.98251500 |
| C | 0.36739400  | -3.08525800 | -1.86937400 |
| C | 1.58116500  | -3.63882700 | -1.38567700 |
| C | -0.78568000 | -3.88864100 | -1.67696000 |
| C | 1.62837400  | -4.85827900 | -0.71516500 |
| H | 2.50590600  | -3.08391200 | -1.51691600 |
| C | -0.73926700 | -5.10567900 | -0.99532500 |
| H | -1.73544300 | -3.57366200 | -2.09743000 |
| C | 0.46531400  | -5.60407300 | -0.49559200 |
| H | 2.58663000  | -5.22938600 | -0.35688800 |
| H | -1.65507700 | -5.68303000 | -0.88083900 |
| H | 0.50282400  | -6.55628900 | 0.02631300  |
| C | -2.78990900 | -0.96598200 | 1.72632200  |
| H | -3.01132300 | -0.21057100 | 2.49158000  |
| C | -1.28905300 | -2.27637200 | 3.20974200  |
| C | -2.61610800 | -2.32497000 | 2.44679800  |
| C | 1.11311800  | 4.46813000  | -1.11019900 |
| C | 2.44782400  | 3.77503400  | -1.40264300 |
| H | 3.29748400  | 4.46408100  | -1.32882000 |
| H | 2.45075700  | 3.37246200  | -2.42397900 |
| H | 0.86880700  | 5.23015900  | -1.86016400 |
| H | 1.18485300  | 4.98307800  | -0.14451500 |
| C | 1.14452700  | -1.43751900 | 2.74702900  |
| C | 2.28687200  | -1.62603700 | 1.94961600  |
| C | 1.30944700  | -0.84822100 | 4.01004100  |
| C | 3.54726200  | -1.22587400 | 2.39270000  |
| H | 2.17985400  | -2.09784900 | 0.97569500  |
| C | 2.57272700  | -0.45327100 | 4.45849300  |
| H | 0.45314100  | -0.70214800 | 4.66176700  |
| C | 3.69568600  | -0.63520400 | 3.65057400  |
| H | 4.41239300  | -1.37438100 | 1.75304500  |
| H | 2.67597500  | -0.00630400 | 5.44419800  |
| H | 4.67790300  | -0.32839200 | 4.00026900  |
| C | -1.30680900 | 3.74166900  | -0.44607900 |
| C | -2.48385200 | 3.17706100  | -0.96670300 |
| C | -1.42090200 | 4.61007700  | 0.65124900  |
| C | -3.72916100 | 3.46291600  | -0.40698000 |
| H | -2.41685700 | 2.50034600  | -1.81541400 |

|   |             |             |             |
|---|-------------|-------------|-------------|
| C | -2.66743200 | 4.90111600  | 1.21042300  |
| H | -0.53632900 | 5.07748000  | 1.07415400  |
| C | -3.82674800 | 4.32774900  | 0.68578300  |
| H | -4.62131900 | 3.00719600  | -0.82680000 |
| H | -2.72995000 | 5.58227500  | 2.05531200  |
| H | -4.79630700 | 4.55848200  | 1.11910900  |
| C | 3.77214500  | 1.70210000  | -0.63272000 |
| C | 3.85154000  | 0.90609200  | -1.78512800 |
| C | 4.83955600  | 1.66453600  | 0.27517800  |
| C | 4.96682800  | 0.10374200  | -2.02485500 |
| H | 3.03059500  | 0.90198900  | -2.49552400 |
| C | 5.95865400  | 0.86292700  | 0.03863100  |
| H | 4.79561100  | 2.27266400  | 1.17613200  |
| C | 6.02645900  | 0.07936300  | -1.11417600 |
| H | 5.00613000  | -0.50479200 | -2.92432600 |
| H | 6.77673400  | 0.85467000  | 0.75443500  |
| H | 6.89577800  | -0.54483700 | -1.30266700 |
| C | -3.89530700 | -0.92462900 | 0.69465100  |
| C | -4.91406600 | 0.03285900  | 0.79355900  |
| C | -3.95028000 | -1.84437600 | -0.36486800 |
| C | -5.95774400 | 0.07463300  | -0.13408700 |
| H | -4.89160500 | 0.75355300  | 1.60792100  |
| C | -4.99088700 | -1.80573700 | -1.29280400 |
| H | -3.17036600 | -2.59383300 | -0.46905200 |
| C | -5.99991600 | -0.84534800 | -1.18200400 |
| H | -6.74035000 | 0.82235700  | -0.03164200 |
| H | -5.01319700 | -2.52745900 | -2.10512800 |
| H | -6.81108400 | -0.81781100 | -1.90450200 |
| H | -3.46980300 | -2.51659600 | 3.10783800  |
| H | -2.58865800 | -3.13938500 | 1.71291100  |
| H | -1.37331000 | -1.54963600 | 4.02780000  |
| H | -1.03774400 | -3.24314300 | 3.66272300  |
| H | -1.62434600 | 1.72915700  | 1.67047900  |
| H | -0.76769400 | 1.00214400  | 3.03282500  |
| H | 0.52710700  | 2.86654200  | 1.89204800  |
| H | 1.40450600  | 1.33632600  | 1.96201400  |

### TS2\_bc

|    |             |             |             |
|----|-------------|-------------|-------------|
| C  | 1.36556500  | 1.90841900  | 1.07664800  |
| C  | -0.02891100 | 1.70964300  | 1.69915000  |
| Cu | 0.01157300  | -0.62314200 | -0.76060700 |
| C  | -0.25553700 | -1.12547900 | 2.81867300  |
| H  | -0.24757100 | -2.11176800 | 2.34122700  |

|   |             |             |             |
|---|-------------|-------------|-------------|
| C | -2.52958600 | 0.26549000  | 2.06430300  |
| H | -2.46533700 | 1.15416800  | 2.70757500  |
| C | 1.09219900  | 2.79381000  | -1.77672300 |
| H | 0.91804500  | 2.34296000  | -2.76323900 |
| P | -0.77678500 | 0.02338500  | 1.37931200  |
| P | 1.52832800  | 1.28806500  | -0.69175900 |
| C | 1.46303800  | -3.42650100 | -0.75055500 |
| H | 0.86044300  | -4.04665100 | -0.09813900 |
| H | 2.54015600  | -3.54360400 | -0.67044500 |
| C | 0.95904000  | -2.60246700 | -1.71554500 |
| C | -0.39275100 | -2.17584700 | -2.11305100 |
| H | 1.72798300  | -2.11667100 | -2.31987400 |
| C | 3.41043700  | 1.52528500  | -0.95465500 |
| H | 3.76955100  | 1.96513200  | -0.01595300 |
| C | 2.39221900  | 3.61223600  | -1.86511600 |
| C | 3.53193600  | 2.60742700  | -2.05789700 |
| C | -1.43663400 | -1.10326400 | 3.81323900  |
| C | -2.72529000 | -0.95601300 | 2.99457300  |
| H | -3.60577900 | -0.81248200 | 3.63184800  |
| H | -2.90403600 | -1.85582900 | 2.39208100  |
| H | -1.43714300 | -2.01021900 | 4.42993900  |
| H | -1.35314300 | -0.25111500 | 4.49893400  |
| C | -0.17833400 | 3.50703500  | -1.36879200 |
| C | -1.41797600 | 2.91794400  | -1.67391600 |
| C | -0.17798800 | 4.72691200  | -0.67749300 |
| C | -2.61591600 | 3.51689700  | -1.28878300 |
| H | -1.43977200 | 1.97134200  | -2.20975000 |
| C | -1.37854000 | 5.33459600  | -0.29748700 |
| H | 0.75919300  | 5.22084600  | -0.43955500 |
| C | -2.59990100 | 4.73153100  | -0.59671800 |
| H | -3.55867600 | 3.03115600  | -1.52139300 |
| H | -1.35359900 | 6.28408300  | 0.23139800  |
| H | -3.53219300 | 5.20272200  | -0.29771100 |
| C | 1.13517900  | -0.87255000 | 3.35831400  |
| C | 2.22877300  | -1.51993400 | 2.75668300  |
| C | 1.39119400  | 0.00673100  | 4.42225900  |
| C | 3.53204600  | -1.28973100 | 3.19815300  |
| H | 2.05465000  | -2.20251700 | 1.92729500  |
| C | 2.69538300  | 0.23366800  | 4.86872500  |
| H | 0.57080100  | 0.51497400  | 4.92071100  |
| C | 3.77192700  | -0.41111600 | 4.25774800  |
| H | 4.35810800  | -1.80273800 | 2.71318400  |
| H | 2.86696100  | 0.91309700  | 5.69977800  |
| H | 4.78554500  | -0.23737600 | 4.60919200  |



|   |             |             |             |
|---|-------------|-------------|-------------|
| C | -3.64337200 | 0.49527700  | 1.06513800  |
| C | -3.84562000 | -0.35299500 | -0.03411200 |
| C | -4.53853300 | 1.55675000  | 1.26421600  |
| C | -4.91452000 | -0.14213900 | -0.90630700 |
| H | -3.16938600 | -1.18183800 | -0.21742600 |
| C | -5.61152900 | 1.76649200  | 0.39558400  |
| H | -4.39617100 | 2.22399400  | 2.11209100  |
| C | -5.80193700 | 0.91660800  | -0.69582200 |
| H | -5.04826800 | -0.81636700 | -1.74726400 |
| H | -6.29642500 | 2.59199900  | 0.57327400  |
| H | -6.63659200 | 1.07504900  | -1.37392600 |
| C | 4.20700100  | 0.26416600  | -1.21001600 |
| C | 5.14271900  | -0.17776200 | -0.26437400 |
| C | 4.05579400  | -0.48070800 | -2.38976600 |
| C | 5.90434500  | -1.32727100 | -0.48591700 |
| H | 5.27703000  | 0.38634800  | 0.65603800  |
| C | 4.81507900  | -1.62849300 | -2.61595500 |
| H | 3.33258000  | -0.16789700 | -3.13889700 |
| C | 5.74318400  | -2.05750800 | -1.66372100 |
| H | 6.62668600  | -1.64761800 | 0.26062200  |
| H | 4.67787200  | -2.19123100 | -3.53527800 |
| H | 6.33411500  | -2.95195500 | -1.84028700 |
| C | -1.59244000 | -2.93009600 | -1.67160700 |
| C | -1.72021000 | -3.49885000 | -0.37735700 |
| C | -2.70713800 | -3.11265900 | -2.52742800 |
| C | -2.85907000 | -4.19503200 | 0.02233500  |
| H | -0.92095100 | -3.36223900 | 0.34091500  |
| C | -3.85024900 | -3.80509300 | -2.12422300 |
| H | -2.67939400 | -2.71226100 | -3.53461400 |
| C | -3.94183100 | -4.35844000 | -0.84646000 |
| H | -2.89996800 | -4.61410100 | 1.02621300  |
| H | -4.67346700 | -3.92146900 | -2.82669400 |
| H | -4.82915800 | -4.90312400 | -0.53576100 |
| C | -0.43984400 | -1.65682100 | -3.55425800 |
| H | 0.46459300  | -1.08042000 | -3.78298400 |
| H | -0.50037800 | -2.46910900 | -4.30141800 |
| H | -1.29488100 | -0.99450300 | -3.73470300 |
| H | 3.44795800  | 2.14262200  | -3.04783700 |
| H | 4.51847100  | 3.08377400  | -2.01448700 |
| H | 2.34530100  | 4.34405100  | -2.68123700 |
| H | 2.55988700  | 4.17547100  | -0.93823500 |
| H | 0.01659800  | 1.91501500  | 2.77554100  |
| H | -0.73845300 | 2.42206800  | 1.26242100  |
| H | 2.10644900  | 1.33693800  | 1.64878800  |

|   |             |             |             |
|---|-------------|-------------|-------------|
| H | 1. 65257900 | 2. 96575200 | 1. 14225300 |
|---|-------------|-------------|-------------|

**TS2\_bd**

|    |              |              |              |
|----|--------------|--------------|--------------|
| C  | 0. 51522400  | 1. 77370800  | 1. 58590700  |
| C  | -0. 78141100 | 1. 01007600  | 1. 91181800  |
| Cu | 0. 36598600  | -0. 25543500 | -1. 05851600 |
| C  | -2. 84091200 | -0. 95140100 | 1. 41605500  |
| C  | -0. 33869600 | -2. 00691400 | 1. 92374600  |
| C  | 2. 60000300  | 2. 80533200  | -0. 15749000 |
| P  | -1. 05174600 | -0. 55328400 | 0. 91153400  |
| P  | 0. 91979700  | 1. 89972100  | -0. 24131700 |
| C  | -1. 12229100 | -1. 10793700 | -3. 78017800 |
| H  | -1. 83350400 | -1. 87305000 | -3. 49590800 |
| H  | -1. 46155200 | -0. 39545200 | -4. 52719600 |
| C  | 0. 16826500  | -1. 04538600 | -3. 34148700 |
| C  | 0. 98004400  | -1. 78329700 | -2. 35808400 |
| H  | 0. 74871100  | -0. 24452900 | -3. 80915600 |
| C  | 0. 00891200  | 3. 44744500  | -0. 90409000 |
| C  | 2. 40581000  | 4. 05432700  | -1. 04689900 |
| C  | 1. 00999900  | 4. 61095500  | -0. 75181600 |
| C  | -2. 77692500 | -2. 42735100 | 1. 88161800  |
| C  | -1. 51783200 | -2. 56917600 | 2. 74542700  |
| C  | 0. 55800500  | -3. 08992600 | -1. 79664300 |
| C  | -0. 79603200 | -3. 45923100 | -1. 58440300 |
| C  | 1. 51681600  | -4. 06026700 | -1. 40405100 |
| C  | -1. 15690100 | -4. 68703100 | -1. 03216900 |
| H  | -1. 58353000 | -2. 76082700 | -1. 82934400 |
| C  | 1. 15437200  | -5. 28379100 | -0. 83998300 |
| H  | 2. 57205500  | -3. 85847700 | -1. 54763100 |
| C  | -0. 18687700 | -5. 61723800 | -0. 64782700 |
| H  | -2. 21302100 | -4. 91900100 | -0. 90593500 |
| H  | 1. 93526100  | -5. 98778200 | -0. 55917000 |
| H  | -0. 46983800 | -6. 57537500 | -0. 22046300 |
| C  | 2. 48007900  | -1. 66316300 | -2. 65115000 |
| H  | 2. 71196600  | -0. 67655800 | -3. 06430700 |
| H  | 2. 82423900  | -2. 41330700 | -3. 38596700 |
| H  | 3. 10528500  | -1. 77851400 | -1. 75890200 |
| H  | 0. 74460000  | 5. 44077800  | -1. 41811500 |
| H  | 0. 99471800  | 5. 00543000  | 0. 27138900  |
| H  | 2. 48062800  | 3. 78242400  | -2. 10721700 |
| H  | 3. 19548500  | 4. 78899500  | -0. 85003900 |
| H  | -1. 65583300 | -2. 00512000 | 3. 67674300  |
| H  | -1. 32596000 | -3. 61177700 | 3. 02551400  |

|   |             |             |             |
|---|-------------|-------------|-------------|
| H | -3.68876900 | -2.69479000 | 2.42918800  |
| H | -2.71129200 | -3.09062800 | 1.01077600  |
| H | -3.01872000 | -0.34385700 | 2.31443400  |
| H | -0.10568200 | -2.74030200 | 1.14384500  |
| C | 0.94772300  | -1.68298100 | 2.64985400  |
| C | 2.16851200  | -1.84398300 | 1.97135400  |
| C | 0.98250900  | -1.19364300 | 3.96506400  |
| C | 3.37956800  | -1.51434500 | 2.58023700  |
| H | 2.16094200  | -2.23983300 | 0.95851900  |
| C | 2.19496700  | -0.86843400 | 4.57861600  |
| H | 0.06092900  | -1.07364200 | 4.52754400  |
| C | 3.39806700  | -1.02247300 | 3.88794500  |
| H | 4.30804300  | -1.64407700 | 2.03116700  |
| H | 2.19658500  | -0.49828700 | 5.60086100  |
| H | 4.34071200  | -0.77221100 | 4.36761100  |
| C | -3.95491300 | -0.64730800 | 0.43293700  |
| C | -5.20803700 | -0.26174300 | 0.93520100  |
| C | -3.81003500 | -0.77467400 | -0.95539100 |
| C | -6.28640600 | -0.02271500 | 0.08267100  |
| H | -5.33942800 | -0.14942700 | 2.00973200  |
| C | -4.88576200 | -0.53279000 | -1.81252400 |
| H | -2.84624300 | -1.03655700 | -1.37901800 |
| C | -6.12920200 | -0.15902500 | -1.29875500 |
| H | -7.24703600 | 0.27252400  | 0.49721400  |
| H | -4.74433900 | -0.63443900 | -2.88539400 |
| H | -6.96612400 | 0.02636700  | -1.96688600 |
| H | -0.08436300 | 3.23032100  | -1.97576000 |
| H | 2.67253900  | 3.15376100  | 0.88121200  |
| C | -1.38700000 | 3.64917100  | -0.35518400 |
| C | -2.46467100 | 2.97631500  | -0.95576700 |
| C | -1.65470800 | 4.46370200  | 0.75586200  |
| C | -3.76167500 | 3.09985500  | -0.45813200 |
| H | -2.28185600 | 2.33954700  | -1.81817900 |
| C | -2.95425700 | 4.59686700  | 1.25131400  |
| H | -0.85096000 | 5.00950800  | 1.24071600  |
| C | -4.01168400 | 3.91343200  | 0.64978500  |
| H | -4.57238000 | 2.55416500  | -0.93171100 |
| H | -3.13699600 | 5.23927500  | 2.10903800  |
| H | -5.02157500 | 4.01493400  | 1.03757300  |
| C | 3.83199600  | 1.97893500  | -0.45138800 |
| C | 4.16254500  | 1.57016900  | -1.75220600 |
| C | 4.69813800  | 1.62386400  | 0.59310300  |
| C | 5.32280400  | 0.83712600  | -2.00039100 |
| H | 3.50693200  | 1.81928000  | -2.58213900 |

|   |             |             |             |
|---|-------------|-------------|-------------|
| C | 5.85825400  | 0.88628900  | 0.34965000  |
| H | 4.46296600  | 1.93247100  | 1.60931800  |
| C | 6.17665100  | 0.49189500  | -0.95047300 |
| H | 5.55693700  | 0.53068100  | -3.01620900 |
| H | 6.51587800  | 0.62831500  | 1.17582600  |
| H | 7.08071100  | -0.07850600 | -1.14524500 |
| H | -1.64760600 | 1.64228300  | 1.68591200  |
| H | -0.81347600 | 0.79075000  | 2.98610000  |
| H | 0.47743400  | 2.77369600  | 2.03620900  |
| H | 1.37394000  | 1.25243600  | 2.02706900  |

**TS4\_a**

|    |             |             |             |
|----|-------------|-------------|-------------|
| C  | 1.25440900  | 1.52710000  | 1.66889100  |
| C  | 2.52759600  | 0.84791800  | 1.12461900  |
| Cu | 0.30503200  | -0.57017300 | -1.12452700 |
| C  | 2.96079200  | 1.79238200  | -1.74119700 |
| H  | 2.42574000  | 1.61726200  | -2.68271400 |
| C  | 4.06520200  | -0.60770000 | -0.89790300 |
| H  | 4.68684600  | -0.32805300 | -0.03665100 |
| C  | -1.61750000 | 2.00565700  | 1.74500300  |
| H  | -1.07468100 | 2.66790000  | 2.43302200  |
| C  | -0.81643800 | -0.55891300 | 2.40832500  |
| H  | -1.44305200 | -1.25958100 | 1.84204200  |
| P  | 2.41907900  | 0.30697900  | -0.66574800 |
| P  | -0.35287100 | 0.74600600  | 1.08650200  |
| C  | -1.05788400 | -1.69996100 | -2.02287000 |
| H  | -0.66188900 | -2.72771600 | -2.07084400 |
| H  | -1.12038000 | -1.38229500 | -3.07823800 |
| C  | -2.44261500 | -1.71449900 | -1.41435600 |
| C  | -3.52362100 | -2.41831500 | -1.82315500 |
| H  | -2.59613500 | -1.10381200 | -0.52114600 |
| C  | -3.45938200 | -3.36627000 | -3.00122700 |
| H  | -4.33622800 | -3.25764000 | -3.65206100 |
| H  | -2.55999400 | -3.18407800 | -3.59409100 |
| H  | -3.42968500 | -4.41806000 | -2.68115400 |
| C  | -4.82370600 | -2.31620800 | -1.10610600 |
| C  | -5.68835600 | -3.42308400 | -1.00548400 |
| C  | -5.25131500 | -1.11026400 | -0.51498700 |
| C  | -6.90129000 | -3.33999900 | -0.32075300 |
| H  | -5.40161000 | -4.36836200 | -1.45708200 |
| C  | -6.46156400 | -1.02524900 | 0.17146300  |
| H  | -4.63894800 | -0.22016100 | -0.62511300 |
| C  | -7.29492800 | -2.14162400 | 0.27670900  |

|   |             |             |             |
|---|-------------|-------------|-------------|
| H | -7.54080100 | -4.21719500 | -0.25451700 |
| H | -6.76430000 | -0.07641000 | 0.60854500  |
| H | -8.24257200 | -2.07423000 | 0.80483100  |
| C | -1.73129600 | 0.17326400  | 3.41062900  |
| C | -2.58823400 | 1.15142900  | 2.59923200  |
| H | -2.34088700 | -0.54015900 | 3.97881000  |
| H | -1.13779000 | 0.74164700  | 4.13823300  |
| H | -3.20529200 | 1.79381300  | 3.23894400  |
| H | -3.27342500 | 0.59861700  | 1.94322600  |
| C | 4.68513700  | 0.05937300  | -2.15000700 |
| C | 4.46351500  | 1.56993600  | -2.01480800 |
| C | 0.36238600  | -1.34040800 | 2.94543700  |
| C | 1.00714700  | -1.02371600 | 4.15033500  |
| C | 0.86468600  | -2.41556500 | 2.19065400  |
| C | 2.11905000  | -1.75239700 | 4.58279700  |
| H | 0.63854700  | -0.21122000 | 4.76932900  |
| C | 1.97897800  | -3.13848000 | 2.61491300  |
| H | 0.37772000  | -2.67984800 | 1.25424200  |
| C | 2.61261600  | -2.80845500 | 3.81640200  |
| H | 2.59635000  | -1.49219100 | 5.52433000  |
| H | 2.35236800  | -3.95576100 | 2.00449100  |
| H | 3.47754100  | -3.37329800 | 4.15386400  |
| C | -2.29502000 | 2.86769600  | 0.69801700  |
| C | -2.52079000 | 4.22675700  | 0.96043300  |
| C | -2.74683900 | 2.34393600  | -0.52408400 |
| C | -3.18315500 | 5.04019700  | 0.03837800  |
| H | -2.17440800 | 4.65251100  | 1.90005200  |
| C | -3.40842100 | 3.15421300  | -1.44813300 |
| H | -2.56314200 | 1.30072200  | -0.76654900 |
| C | -3.63009200 | 4.50566000  | -1.17139900 |
| H | -3.34865500 | 6.09022500  | 0.26644700  |
| H | -3.74786000 | 2.72654600  | -2.38787400 |
| H | -4.14539900 | 5.13512100  | -1.89200900 |
| C | 2.52738500  | 3.14443200  | -1.21749000 |
| C | 1.24293000  | 3.61854700  | -1.53448000 |
| C | 3.33983000  | 3.94156600  | -0.39685300 |
| C | 0.77876300  | 4.83739200  | -1.04098100 |
| H | 0.59550100  | 3.01777000  | -2.16933400 |
| C | 2.88140600  | 5.16753300  | 0.09255400  |
| H | 4.34316900  | 3.61637500  | -0.13823500 |
| C | 1.59949600  | 5.61891000  | -0.22357000 |
| H | -0.22418700 | 5.17070000  | -1.29109400 |
| H | 3.53214200  | 5.76999100  | 0.72130200  |
| H | 1.24406800  | 6.57166200  | 0.15941500  |

|   |            |             |             |
|---|------------|-------------|-------------|
| C | 3.98927900 | -2.11880100 | -0.95132400 |
| C | 3.14751900 | -2.78812600 | -1.85387300 |
| C | 4.80251100 | -2.88679700 | -0.10620700 |
| C | 3.12354400 | -4.18181700 | -1.90733700 |
| H | 2.48839200 | -2.21835500 | -2.50306900 |
| C | 4.78227700 | -4.28235600 | -0.15864500 |
| H | 5.46175800 | -2.38597600 | 0.59980900  |
| C | 3.94101500 | -4.93525600 | -1.06074700 |
| H | 2.45924900 | -4.67921300 | -2.60891800 |
| H | 5.42475100 | -4.85638700 | 0.50425200  |
| H | 3.92066200 | -6.02089900 | -1.10419900 |
| H | 5.74733900 | -0.19851100 | -2.23473900 |
| H | 4.19063900 | -0.31691400 | -3.05502700 |
| H | 5.06948100 | 1.94275900  | -1.18006300 |
| H | 4.78014400 | 2.11834000  | -2.91031400 |
| H | 2.72290400 | -0.07631100 | 1.68135500  |
| H | 3.39308800 | 1.50558200  | 1.27372100  |
| H | 1.30445400 | 1.56578700  | 2.76414400  |
| H | 1.20927200 | 2.56172100  | 1.30971200  |

#### TS4\_b

|    |             |             |             |
|----|-------------|-------------|-------------|
| C  | -2.33639300 | -1.41009900 | 0.86454000  |
| C  | -2.98648800 | -0.25097500 | 0.08283100  |
| H  | -2.30222600 | -2.30748400 | 0.23554300  |
| H  | -2.95170500 | -1.65226500 | 1.73995500  |
| H  | -3.94264000 | -0.57777200 | -0.34445600 |
| H  | -3.20297700 | 0.57992200  | 0.76467500  |
| Cu | 0.35648200  | 0.43206800  | -0.56215800 |
| C  | -2.27483100 | -0.45205200 | -2.86200800 |
| H  | -1.35105700 | -0.32875100 | -3.44109500 |
| C  | -2.86469800 | 2.02233300  | -1.76019500 |
| H  | -3.85612800 | 1.91280100  | -1.30059700 |
| C  | -0.03996700 | -2.80377400 | 2.00309800  |
| H  | -0.96102800 | -3.39901000 | 2.05681000  |
| C  | -0.62965800 | -0.33659500 | 3.11659100  |
| H  | 0.32066000  | 0.20808000  | 3.18932600  |
| P  | -1.88312300 | 0.48137600  | -1.24382100 |
| P  | -0.55115200 | -1.08629600 | 1.35618700  |
| C  | 2.29592900  | 0.84570100  | -0.73699300 |
| H  | 2.43621500  | 1.82633800  | -1.21788200 |
| H  | 2.69438000  | 0.11778600  | -1.46399900 |
| C  | 3.09269000  | 0.78057600  | 0.54549100  |
| C  | 4.41077400  | 0.96273200  | 0.83021700  |

|   |              |              |              |
|---|--------------|--------------|--------------|
| H | 2. 50373200  | 0. 54667100  | 1. 43794800  |
| C | 4. 82966400  | 0. 81886700  | 2. 28601200  |
| H | 5. 59367900  | 0. 04136000  | 2. 42343100  |
| H | 5. 25003300  | 1. 74957100  | 2. 69125700  |
| H | 3. 97031100  | 0. 55078700  | 2. 90808100  |
| C | 5. 50117000  | 1. 29484800  | -0. 12671800 |
| C | 5. 31284700  | 1. 41029000  | -1. 52262300 |
| C | 6. 81603700  | 1. 50873800  | 0. 34593900  |
| C | 6. 36727300  | 1. 71816200  | -2. 38031400 |
| H | 4. 32915000  | 1. 25664500  | -1. 93938300 |
| C | 7. 87043300  | 1. 81898200  | -0. 51200400 |
| H | 7. 02793500  | 1. 43474000  | 1. 40617300  |
| C | 7. 65577100  | 1. 92669500  | -1. 88568300 |
| H | 6. 17565400  | 1. 79534000  | -3. 44829200 |
| H | 8. 86461300  | 1. 97623400  | -0. 09994300 |
| H | 8. 47566200  | 2. 16777400  | -2. 55755100 |
| C | 0. 42979300  | -2. 54202800 | 3. 45575800  |
| C | -0. 54716500 | -1. 53848200 | 4. 07819500  |
| C | -3. 04485800 | 1. 85770500  | -3. 29023200 |
| C | -3. 37046200 | 0. 38298400  | -3. 55446200 |
| C | -2. 28792100 | 3. 35327600  | -1. 32460700 |
| C | -3. 10164000 | 4. 28088700  | -0. 65900800 |
| C | -0. 95742900 | 3. 70954700  | -1. 59736100 |
| C | -2. 60740800 | 5. 53076100  | -0. 27871300 |
| H | -4. 13525300 | 4. 02259500  | -0. 43814700 |
| C | -0. 46042400 | 4. 95619800  | -1. 21676800 |
| H | -0. 29606800 | 2. 99968600  | -2. 08654700 |
| C | -1. 28314500 | 5. 87252300  | -0. 55692300 |
| H | -3. 25856000 | 6. 23565200  | 0. 23214800  |
| H | 0. 57480100  | 5. 20764200  | -1. 43096300 |
| H | -0. 89370200 | 6. 84283300  | -0. 26074600 |
| C | -2. 50586300 | -1. 93708800 | -2. 68424700 |
| C | -1. 39336300 | -2. 79113500 | -2. 58731600 |
| C | -3. 78428300 | -2. 50432900 | -2. 57581600 |
| C | -1. 54957100 | -4. 16028300 | -2. 37520800 |
| H | -0. 39271600 | -2. 37253600 | -2. 67149300 |
| C | -3. 94431700 | -3. 87784000 | -2. 37273000 |
| H | -4. 66885100 | -1. 88004200 | -2. 65977200 |
| C | -2. 82983400 | -4. 71031600 | -2. 26687600 |
| H | -0. 67043300 | -4. 79252500 | -2. 29033600 |
| H | -4. 94542900 | -4. 29509900 | -2. 29950500 |
| H | -2. 95661500 | -5. 77780600 | -2. 10800000 |
| C | -1. 74326200 | 0. 66732500  | 3. 31666500  |
| C | -2. 98510700 | 0. 32935800  | 3. 87568800  |

|   |             |             |             |
|---|-------------|-------------|-------------|
| C | -1.54982000 | 1.99445000  | 2.89414500  |
| C | -3.99941900 | 1.28253200  | 4.00166900  |
| H | -3.16802300 | -0.68110500 | 4.22883700  |
| C | -2.56256500 | 2.94578100  | 3.01113400  |
| H | -0.59297000 | 2.28127200  | 2.46307000  |
| C | -3.79534900 | 2.59238700  | 3.56680300  |
| H | -4.95016700 | 0.99709100  | 4.44487200  |
| H | -2.38695500 | 3.96029700  | 2.66488900  |
| H | -4.58519300 | 3.33219800  | 3.66556800  |
| C | 0.95713400  | -3.55129900 | 1.14172400  |
| C | 2.16436500  | -2.96513700 | 0.72823500  |
| C | 0.69872300  | -4.87745500 | 0.76670300  |
| C | 3.08326400  | -3.68762200 | -0.03302100 |
| H | 2.38857700  | -1.93282100 | 0.98424400  |
| C | 1.61758200  | -5.60348200 | 0.00506100  |
| H | -0.23182700 | -5.34791000 | 1.07796700  |
| C | 2.81450600  | -5.00941600 | -0.39789000 |
| H | 4.00880600  | -3.21096000 | -0.34447400 |
| H | 1.39783200  | -6.63240400 | -0.26915700 |
| H | 3.53180000  | -5.56992600 | -0.99153000 |
| H | 1.44488900  | -2.12411200 | 3.44631700  |
| H | 0.47657400  | -3.48144600 | 4.01943200  |
| H | -0.23383500 | -1.21952300 | 5.08019400  |
| H | -1.52819200 | -2.01835200 | 4.18631100  |
| H | -3.82985000 | 2.52926300  | -3.65727400 |
| H | -2.11656400 | 2.13780300  | -3.80472000 |
| H | -3.41957400 | 0.15323400  | -4.62588000 |
| H | -4.35689700 | 0.15668800  | -3.13090500 |

#### TS4\_c

|    |             |             |             |
|----|-------------|-------------|-------------|
| Cu | 0.44953900  | -0.19157000 | -1.29858500 |
| C  | 2.55542300  | -1.47954300 | -3.65327700 |
| C  | 1.21679100  | -1.46924200 | -3.77718700 |
| C  | 0.12003700  | -1.57281300 | -2.75737000 |
| H  | 3.06195100  | -1.51634200 | -2.69345000 |
| H  | 3.19328900  | -1.44840400 | -4.53375000 |
| H  | 0.84786200  | -1.37718200 | -4.80637100 |
| P  | -1.23674700 | -0.49004300 | 1.00934600  |
| P  | 1.06740400  | 1.73214000  | -0.17967200 |
| C  | -0.85552500 | 1.11615200  | 1.91037000  |
| C  | 0.51014500  | 1.75885600  | 1.60570700  |
| C  | 0.33210100  | 3.28054800  | -1.01514700 |
| H  | 0.34677100  | 3.01183600  | -2.07928200 |



|   |             |             |             |
|---|-------------|-------------|-------------|
| C | 2.79675600  | 2.50680200  | -0.01529100 |
| C | -2.99489200 | -0.80156500 | 1.69752100  |
| C | -0.48341700 | -1.89855100 | 2.07732600  |
| H | -0.30490600 | -2.68548200 | 1.33565200  |
| C | -1.61745900 | -2.38660100 | 3.00455300  |
| C | -2.93327400 | -2.25093500 | 2.23363700  |
| H | -3.10607800 | -0.13614400 | 2.56454800  |
| C | 1.38252000  | 4.38894900  | -0.80726200 |
| C | 2.75942800  | 3.73436500  | -0.95952700 |
| H | 2.83168900  | 2.88794300  | 1.01381800  |
| C | -1.10395900 | 3.57535900  | -0.63794800 |
| C | -2.13323900 | 2.84400100  | -1.25558500 |
| C | -1.45812000 | 4.53340400  | 0.32263900  |
| C | -3.46918200 | 3.05085300  | -0.91692900 |
| H | -1.87930700 | 2.09445200  | -2.00195900 |
| C | -2.79799800 | 4.74967900  | 0.65795100  |
| H | -0.69243700 | 5.12830400  | 0.81123800  |
| C | -3.80705400 | 4.00805100  | 0.04387000  |
| H | -4.24436500 | 2.46057400  | -1.39627200 |
| H | -3.04897600 | 5.50298400  | 1.40044900  |
| H | -4.84788800 | 4.17329600  | 0.30792300  |
| C | 3.98695200  | 1.59494600  | -0.21426000 |
| C | 4.93947900  | 1.46093200  | 0.80550800  |
| C | 4.19962600  | 0.90874500  | -1.41954500 |
| C | 6.07782200  | 0.67142900  | 0.62894900  |
| H | 4.78974600  | 1.98329800  | 1.74793500  |
| C | 5.33627200  | 0.12012600  | -1.59907100 |
| H | 3.46828400  | 0.97292000  | -2.22085200 |
| C | 6.28111100  | -0.00084000 | -0.57675600 |
| H | 6.80489900  | 0.58632100  | 1.43250100  |
| H | 5.47978400  | -0.40363500 | -2.54004600 |
| H | 7.16631000  | -0.61463200 | -0.71997800 |
| C | 0.84321100  | -1.57295300 | 2.72685500  |
| C | 0.94534800  | -0.97495400 | 3.99360100  |
| C | 2.03386900  | -1.85185700 | 2.03335300  |
| C | 2.19036300  | -0.65650800 | 4.54151000  |
| H | 0.04994900  | -0.75968700 | 4.56950600  |
| C | 3.27828900  | -1.52816700 | 2.57505300  |
| H | 1.97701600  | -2.33817500 | 1.06228100  |
| C | 3.36236600  | -0.92582800 | 3.83288600  |
| H | 2.24147300  | -0.20051600 | 5.52725500  |
| H | 4.18208400  | -1.74741300 | 2.01350500  |
| H | 4.33071500  | -0.67870600 | 4.25988400  |
| C | -4.14005000 | -0.52648200 | 0.74883800  |

|   |             |             |             |
|---|-------------|-------------|-------------|
| C | -4.24260500 | -1.17840100 | -0.49029100 |
| C | -5.15535300 | 0.37012700  | 1.11021500  |
| C | -5.32374000 | -0.93997400 | -1.33841000 |
| H | -3.46551700 | -1.87433500 | -0.79268300 |
| C | -6.24208300 | 0.60943100  | 0.26563600  |
| H | -5.09638300 | 0.88442900  | 2.06710700  |
| C | -6.32985800 | -0.04422400 | -0.96426600 |
| H | -5.38117700 | -1.45594000 | -2.29333500 |
| H | -7.02005800 | 1.30448600  | 0.57175000  |
| H | -7.17432900 | 0.13770000  | -1.62369400 |
| C | 0.04948600  | -2.86686600 | -1.99373900 |
| C | 1.19829000  | -3.53921700 | -1.50711800 |
| C | -1.18877600 | -3.48876200 | -1.70137200 |
| C | 1.11263200  | -4.71444100 | -0.76369900 |
| H | 2.17914800  | -3.13445300 | -1.72598600 |
| C | -1.27585100 | -4.66252400 | -0.94794200 |
| H | -2.10634100 | -3.06266500 | -2.09047900 |
| C | -0.12746300 | -5.28614000 | -0.45994700 |
| H | 2.02864200  | -5.19077800 | -0.41955200 |
| H | -2.25479900 | -5.10078200 | -0.76140800 |
| H | -0.19252100 | -6.20115500 | 0.12263100  |
| C | -1.21688800 | -1.18339300 | -3.42018400 |
| H | -1.09650600 | -0.26129000 | -4.00096900 |
| H | -1.58575700 | -1.95869800 | -4.11776400 |
| H | -2.01564000 | -0.99499900 | -2.69447700 |
| H | -2.95249100 | -2.96091800 | 1.39719400  |
| H | -3.80682000 | -2.46597400 | 2.86128600  |
| H | -1.67261900 | -1.77370900 | 3.91287500  |
| H | -1.43181900 | -3.41862000 | 3.32661100  |
| H | 3.57688100  | 4.42324000  | -0.71687900 |
| H | 2.91052700  | 3.41072800  | -1.99729700 |
| H | 1.23061000  | 5.20863800  | -1.51990000 |
| H | 1.30144500  | 4.81894500  | 0.19891700  |
| H | 0.51784200  | 2.79447400  | 1.97046900  |
| H | 1.30017200  | 1.22456700  | 2.14667400  |
| H | -1.65728900 | 1.79589900  | 1.59889200  |
| H | -0.94875500 | 0.98780800  | 2.99621400  |

#### TS4\_d

|    |             |             |             |
|----|-------------|-------------|-------------|
| Cu | 0.23392400  | -0.32862600 | -1.15421000 |
| C  | -1.87398900 | -0.58853000 | -3.57913600 |
| C  | -0.75209600 | -1.31352300 | -3.70342500 |
| C  | 0.21858800  | -1.74511900 | -2.63939800 |

|   |             |             |             |
|---|-------------|-------------|-------------|
| H | -2.20930800 | -0.20672300 | -2.61588800 |
| H | -2.50907600 | -0.37319400 | -4.43622000 |
| H | -0.50296600 | -1.64632000 | -4.72129600 |
| P | 1.12943200  | 1.69816000  | -0.33929100 |
| P | -0.98357000 | -0.43434600 | 1.08985300  |
| C | 0.78942700  | 1.80562800  | 1.49902800  |
| C | -0.54739200 | 1.18081100  | 1.94137200  |
| C | -0.20810700 | -1.84859000 | 2.12444900  |
| H | -0.03725400 | -2.62567000 | 1.37078600  |
| C | -2.72310500 | -0.73692100 | 1.80822500  |
| C | 2.89852400  | 2.38807800  | -0.43061900 |
| C | 0.36574500  | 3.25067600  | -1.15616300 |
| C | 1.51450200  | 4.27852100  | -1.23970000 |
| H | 1.31135500  | 5.02173800  | -2.02018600 |
| C | 2.80847700  | 3.50101400  | -1.50195600 |
| H | 3.06927400  | 2.87864200  | 0.53713300  |
| H | 2.78479700  | 3.05378100  | -2.50422700 |
| H | 3.69510200  | 4.14455400  | -1.45953800 |
| C | -1.32925200 | -2.35005800 | 3.06149100  |
| C | -2.65864200 | -2.19662800 | 2.31542800  |
| H | -2.79428100 | -0.08711800 | 2.69148000  |
| C | 1.12730300  | -1.51766900 | 2.75341300  |
| C | 2.30646200  | -1.77675500 | 2.03375100  |
| C | 1.24842400  | -0.92935900 | 4.02269000  |
| C | 3.55858400  | -1.44707900 | 2.55313400  |
| H | 2.23492300  | -2.24804400 | 1.05654500  |
| C | 2.50104500  | -0.60457500 | 4.54889300  |
| H | 0.36230200  | -0.72757000 | 4.61755100  |
| C | 3.66131500  | -0.85681300 | 3.81525000  |
| H | 4.45191300  | -1.64979800 | 1.96934600  |
| H | 2.56736500  | -0.15596400 | 5.53701600  |
| H | 4.63531000  | -0.60383500 | 4.22559400  |
| C | -3.89185400 | -0.42058500 | 0.90221500  |
| C | -4.86574000 | 0.50114000  | 1.31152800  |
| C | -4.05652700 | -1.05511500 | -0.33919800 |
| C | -5.97576300 | 0.78136800  | 0.51105900  |
| H | -4.75693700 | 1.00207000  | 2.27118100  |
| C | -5.16180400 | -0.77452900 | -1.14247500 |
| H | -3.31434200 | -1.77098600 | -0.68040900 |
| C | -6.12717700 | 0.14446000  | -0.72141500 |
| H | -6.72152400 | 1.49447200  | 0.85368000  |
| H | -5.26690800 | -1.27512200 | -2.10135600 |
| H | -6.98957200 | 0.35828200  | -1.34731100 |
| C | -0.94460800 | 3.71074100  | -0.55532900 |

|   |             |             |             |
|---|-------------|-------------|-------------|
| C | -1.01731800 | 4.64924700  | 0.48563400  |
| C | -2.14611400 | 3.16336300  | -1.03602600 |
| C | -2.24860300 | 5.02292300  | 1.02976400  |
| H | -0.11217600 | 5.10498300  | 0.87621500  |
| C | -3.37620400 | 3.52840300  | -0.48980200 |
| H | -2.11305300 | 2.43929000  | -1.84704200 |
| C | -3.43204500 | 4.46241800  | 0.54766700  |
| H | -2.27940500 | 5.75709400  | 1.83087900  |
| H | -4.28777800 | 3.07865200  | -0.87172800 |
| H | -4.38893700 | 4.75329500  | 0.97247600  |
| C | 4.00680500  | 1.38192600  | -0.64824600 |
| C | 4.03094100  | 0.54334200  | -1.77324800 |
| C | 5.06418500  | 1.29547500  | 0.26799300  |
| C | 5.08279400  | -0.34974600 | -1.97623800 |
| H | 3.21354500  | 0.57370300  | -2.48779900 |
| C | 6.12009000  | 0.40338500  | 0.06719800  |
| H | 5.06215500  | 1.93615600  | 1.14726800  |
| C | 6.13313400  | -0.42280900 | -1.05736000 |
| H | 5.07848800  | -0.99158000 | -2.85302500 |
| H | 6.93194900  | 0.35798300  | 0.78869500  |
| H | 6.95308000  | -1.11770100 | -1.21765600 |
| C | -0.17696800 | -3.00116600 | -1.91276500 |
| C | 0.77810200  | -3.77912000 | -1.21017200 |
| C | -1.50892600 | -3.47676400 | -1.86071700 |
| C | 0.42219300  | -4.91359100 | -0.48039900 |
| H | 1.82400600  | -3.48677400 | -1.23072500 |
| C | -1.86485200 | -4.61271700 | -1.13294400 |
| H | -2.27253900 | -2.94532400 | -2.41926700 |
| C | -0.90694800 | -5.34184900 | -0.42296800 |
| H | 1.19660600  | -5.47293600 | 0.04136200  |
| H | -2.90345700 | -4.93911200 | -1.13523100 |
| H | -1.18379700 | -6.22925800 | 0.13985500  |
| C | 1.61697000  | -1.85391400 | -3.28668900 |
| H | 1.68245100  | -2.70343400 | -3.99194600 |
| H | 1.84235100  | -0.94337300 | -3.85555000 |
| H | 2.42548200  | -1.97403200 | -2.55957900 |
| H | 1.61486500  | 4.82665800  | -0.29504500 |
| H | 0.15716900  | 2.90589800  | -2.17635100 |
| H | -3.52095600 | -2.41641300 | 2.95649000  |
| H | -2.69634700 | -2.89253000 | 1.46813300  |
| H | -1.14105900 | -3.38873000 | 3.35852600  |
| H | -1.36608800 | -1.75472900 | 3.98238500  |
| H | 0.84389100  | 2.84716000  | 1.83991800  |
| H | 1.62234600  | 1.26809000  | 1.96791200  |

|   |             |            |            |
|---|-------------|------------|------------|
| H | -1.37195900 | 1.85713700 | 1.68608200 |
| H | -0.55017000 | 1.06322000 | 3.03175100 |

**2a**

|   |             |             |             |
|---|-------------|-------------|-------------|
| C | -4.78352900 | -0.00138200 | -0.34374800 |
| C | -3.59750600 | -0.69465600 | -0.56520600 |
| C | -2.37850700 | -0.16293300 | -0.11819500 |
| C | -2.35821800 | 1.06784800  | 0.55357100  |
| C | -3.54899200 | 1.75781600  | 0.77345000  |
| C | -4.76027600 | 1.22592200  | 0.32524500  |
| H | -5.72594700 | -0.41546500 | -0.69077100 |
| H | -3.59132300 | -1.64963200 | -1.08019000 |
| H | -1.41555700 | 1.47459700  | 0.90167900  |
| H | -3.53237100 | 2.71023400  | 1.29575800  |
| H | -5.68675500 | 1.76697900  | 0.49832900  |
| C | -1.14912500 | -0.95361200 | -0.37986800 |
| O | -1.11124800 | -2.03479300 | -0.90732400 |
| O | 0.00002300  | -0.26041800 | -0.00025500 |
| C | 1.14905700  | -0.95356700 | 0.37971700  |
| O | 1.11108000  | -2.03466300 | 0.90734600  |
| C | 2.37849600  | -0.16294600 | 0.11814500  |
| C | 2.35834000  | 1.06774000  | -0.55379600 |
| C | 3.59740500  | -0.69462700 | 0.56544800  |
| C | 3.54916400  | 1.75765700  | -0.77356400 |
| H | 1.41574600  | 1.47445400  | -0.90212800 |
| C | 4.78347900  | -0.00140300 | 0.34409900  |
| H | 3.59111300  | -1.64953000 | 1.08056500  |
| C | 4.76036100  | 1.22580600  | -0.32507100 |
| H | 3.53265000  | 2.71000000  | -1.29601100 |
| H | 5.72582800  | -0.41545300 | 0.69134600  |
| H | 5.68687900  | 1.76682500  | -0.49806900 |

**Int3\_a1**

|   |             |             |             |
|---|-------------|-------------|-------------|
| C | -3.43575000 | -1.35761900 | 0.79724700  |
| C | -3.93503700 | 0.01215000  | 0.29711200  |
| H | -3.61743300 | -2.12000900 | 0.03132700  |
| H | -4.01276600 | -1.64936500 | 1.68457100  |
| H | -3.93662900 | 0.72782800  | 1.12717900  |
| H | -4.97707700 | -0.09301700 | -0.03287700 |
| P | -2.89242200 | 0.82753700  | -1.04050300 |
| P | -1.60746700 | -1.48644800 | 1.17544400  |
| C | 0.65427100  | -0.54823700 | -2.31832100 |

|    |             |             |             |
|----|-------------|-------------|-------------|
| C  | 2.05243700  | -0.14694600 | -2.26614400 |
| H  | 0.55235400  | -1.59720800 | -2.62195400 |
| C  | 2.13967300  | 1.14845800  | 1.07949500  |
| C  | 2.62758400  | 1.07825700  | -2.47533400 |
| Cu | -0.29634400 | -0.56430800 | -0.52386200 |
| O  | 0.97737000  | 0.81381400  | 0.96136400  |
| C  | -3.86367300 | 2.47320400  | -1.20936000 |
| H  | -4.74602700 | 2.38125500  | -0.56324700 |
| C  | -3.62449400 | 0.14282300  | -2.67976600 |
| H  | -2.81442800 | 0.32536000  | -3.39836200 |
| C  | -1.38262100 | -0.88679800 | 2.97212400  |
| H  | -0.32813100 | -0.59054400 | 2.98749800  |
| C  | -1.47171700 | -3.32475000 | 1.65468900  |
| H  | -2.50702800 | -3.68049800 | 1.74229700  |
| C  | 1.78666600  | 2.29720100  | -2.78573700 |
| H  | 1.63956100  | 2.94321100  | -1.90601300 |
| H  | 2.24795800  | 2.91902900  | -3.56387000 |
| H  | 0.79117700  | 2.00869800  | -3.13624200 |
| C  | 4.09176800  | 1.25763000  | -2.42450900 |
| C  | 4.66715600  | 2.52192800  | -2.16401600 |
| C  | 4.99510400  | 0.19705700  | -2.67701300 |
| C  | 6.04959000  | 2.70808900  | -2.12766700 |
| H  | 4.02004900  | 3.37192100  | -1.97229900 |
| C  | 6.37500500  | 0.38238200  | -2.63599500 |
| H  | 4.60310900  | -0.77839800 | -2.94947700 |
| C  | 6.91868700  | 1.64084100  | -2.35666500 |
| H  | 6.44795100  | 3.69840900  | -1.91724400 |
| H  | 7.03280500  | -0.45655300 | -2.85559300 |
| H  | 7.99543000  | 1.78729800  | -2.33734100 |
| C  | 2.62770000  | 2.54011400  | 1.09699300  |
| C  | 3.97159600  | 2.86102200  | 1.34975100  |
| C  | 1.69337800  | 3.56934300  | 0.88447200  |
| C  | 4.36923700  | 4.19523300  | 1.40350200  |
| H  | 4.69426700  | 2.06847100  | 1.50206800  |
| C  | 2.09898500  | 4.89948000  | 0.93808800  |
| H  | 0.65935100  | 3.31332000  | 0.67991800  |
| C  | 3.43598100  | 5.21516200  | 1.20108400  |
| H  | 5.40933600  | 4.43852200  | 1.60059800  |
| H  | 1.36950200  | 5.68799000  | 0.77802600  |
| H  | 3.74997900  | 6.25468800  | 1.24584900  |
| H  | 2.73279800  | -0.95320600 | -1.98524300 |
| H  | 0.02145400  | 0.08808600  | -2.94731200 |
| O  | 3.17229400  | 0.22842300  | 1.22044500  |
| C  | 2.98545000  | -1.00687000 | 1.80972200  |

|   |             |             |             |
|---|-------------|-------------|-------------|
| O | 2.06844400  | -1.25324000 | 2.56164700  |
| C | 4.07958600  | -1.94659100 | 1.46176100  |
| C | 4.11472900  | -3.18301000 | 2.12693800  |
| C | 5.05730000  | -1.63819000 | 0.50345000  |
| C | 5.11865500  | -4.10200500 | 1.83623800  |
| H | 3.35209800  | -3.40340300 | 2.86632800  |
| C | 6.05845000  | -2.56485000 | 0.21597500  |
| H | 5.02712400  | -0.69121800 | -0.02273400 |
| C | 6.09210400  | -3.79327000 | 0.88027800  |
| H | 5.14448400  | -5.05728900 | 2.35277500  |
| H | 6.80923700  | -2.32318000 | -0.53066600 |
| H | 6.87546900  | -4.51172400 | 0.65351000  |
| C | -4.78911300 | 1.08210600  | -3.04650200 |
| C | -4.35347900 | 2.50146100  | -2.67873600 |
| H | -5.05116600 | 0.98989000  | -4.10833200 |
| H | -5.68901300 | 0.82766600  | -2.47293100 |
| H | -5.16298400 | 3.23146500  | -2.80173600 |
| H | -3.53468700 | 2.82231500  | -3.33576200 |
| C | -0.85998600 | -3.30141700 | 3.07737800  |
| C | -1.52512100 | -2.15266100 | 3.84115600  |
| H | -1.07220600 | -1.99619700 | 4.82785500  |
| H | -2.58150800 | -2.39918500 | 4.00718900  |
| H | -1.00882200 | -4.26957500 | 3.57079900  |
| H | 0.21957700  | -3.12489900 | 3.01607700  |
| C | -3.10464500 | 3.71649800  | -0.79865600 |
| C | -3.63673100 | 4.58586400  | 0.16406500  |
| C | -1.88228400 | 4.06191600  | -1.39742000 |
| C | -2.97968000 | 5.76845100  | 0.51256900  |
| H | -4.58058900 | 4.33464200  | 0.64290600  |
| C | -1.22555100 | 5.24500000  | -1.05803900 |
| H | -1.43587200 | 3.39879100  | -2.13409800 |
| C | -1.77275200 | 6.10557000  | -0.10150000 |
| H | -3.41684800 | 6.42880600  | 1.25737000  |
| H | -0.28543800 | 5.49371800  | -1.54339800 |
| H | -1.26600800 | 7.03168100  | 0.15766500  |
| C | -3.90487500 | -1.34481000 | -2.68747000 |
| C | -5.17959300 | -1.88161300 | -2.44857100 |
| C | -2.84745200 | -2.24033900 | -2.92579700 |
| C | -5.38823800 | -3.26363100 | -2.44006500 |
| H | -6.02656400 | -1.22436300 | -2.27712500 |
| C | -3.05139300 | -3.61952600 | -2.91116000 |
| H | -1.85176400 | -1.84756300 | -3.11373600 |
| C | -4.32578600 | -4.13869100 | -2.66696200 |
| H | -6.38715500 | -3.65312900 | -2.25945600 |

|   |             |             |             |
|---|-------------|-------------|-------------|
| H | -2.21265800 | -4.28746700 | -3.08484300 |
| H | -4.48907000 | -5.21315300 | -2.66136400 |
| C | -2.21615900 | 0.31865400  | 3.35122800  |
| C | -3.44697800 | 0.21770500  | 4.01786000  |
| C | -1.75334600 | 1.60225100  | 3.01170500  |
| C | -4.19257800 | 1.35815900  | 4.32876100  |
| H | -3.83187700 | -0.75417300 | 4.31151900  |
| C | -2.49860600 | 2.74107200  | 3.31523700  |
| H | -0.80277100 | 1.69792700  | 2.49409900  |
| C | -3.72444900 | 2.62428900  | 3.97639700  |
| H | -5.13978100 | 1.25256400  | 4.85200500  |
| H | -2.12239000 | 3.72012300  | 3.03203200  |
| H | -4.30402500 | 3.51087800  | 4.22002700  |
| C | -0.74934000 | -4.21748600 | 0.67052600  |
| C | -1.41430200 | -5.30146000 | 0.08187100  |
| C | 0.60106100  | -4.01088000 | 0.34639400  |
| C | -0.75444600 | -6.15794900 | -0.80301000 |
| H | -2.46099400 | -5.47821800 | 0.31980000  |
| C | 1.26365700  | -4.86444000 | -0.53517000 |
| H | 1.13609700  | -3.17508400 | 0.78661500  |
| C | 0.58837700  | -5.94202600 | -1.11486600 |
| H | -1.29024600 | -6.99528100 | -1.24326900 |
| H | 2.31033100  | -4.68682400 | -0.76754000 |
| H | 1.10582700  | -6.60702600 | -1.80129600 |

### Int3\_a2

|    |             |             |             |
|----|-------------|-------------|-------------|
| C  | -3.59196400 | 0.68028700  | 1.42568400  |
| C  | -3.12727900 | -0.73957400 | 1.80357300  |
| H  | -3.01221500 | 1.41940500  | 1.99053100  |
| H  | -4.64343600 | 0.80676600  | 1.71451000  |
| H  | -3.83769000 | -1.47723400 | 1.41328800  |
| H  | -3.12249700 | -0.84466400 | 2.89605400  |
| P  | -1.46058500 | -1.23842100 | 1.10241200  |
| P  | -3.33086000 | 1.13241100  | -0.38070300 |
| C  | 0.44391900  | 0.67993800  | -2.96830800 |
| Cu | -1.30059600 | -0.40142200 | -1.07816300 |
| C  | -1.39169500 | -3.07159600 | 1.61681600  |
| H  | -2.32436700 | -3.24722400 | 2.16777000  |
| C  | -0.18127100 | -0.70912400 | 2.40128300  |
| H  | 0.76663700  | -0.75899100 | 1.85427200  |
| C  | -4.94918900 | 0.59136000  | -1.24100700 |
| H  | -4.66849000 | 0.58235400  | -2.30320300 |
| C  | -3.86582400 | 2.97157700  | -0.34357500 |



|   |             |             |             |
|---|-------------|-------------|-------------|
| H | -4.17150300 | 3.17055900  | 0.69134400  |
| C | 1.79649900  | 0.55447200  | -2.81040200 |
| C | -0.16122800 | -1.85721000 | 3.42721700  |
| C | -0.21220600 | -3.16165000 | 2.62355500  |
| H | 0.74232200  | -1.79605400 | 4.04465200  |
| H | -1.02798900 | -1.80369100 | 4.09945700  |
| H | -0.33624800 | -4.04033300 | 3.26792000  |
| H | 0.72803800  | -3.28516100 | 2.07812600  |
| C | -5.13096600 | 3.04621300  | -1.23723700 |
| C | -5.93192200 | 1.75746500  | -1.03330700 |
| H | -6.78443100 | 1.68611800  | -1.72077300 |
| H | -6.33922800 | 1.74487500  | -0.01419900 |
| H | -5.71538200 | 3.94285500  | -0.99817800 |
| H | -4.83331000 | 3.13352400  | -2.28987500 |
| C | -1.32021900 | -4.07253600 | 0.48338700  |
| C | -0.28436000 | -4.03593100 | -0.46476400 |
| C | -2.28229500 | -5.08594900 | 0.37798400  |
| C | -0.21981400 | -4.98412600 | -1.48582700 |
| H | 0.47474400  | -3.26145900 | -0.40513300 |
| C | -2.21706600 | -6.03972400 | -0.64138900 |
| H | -3.09139100 | -5.12984800 | 1.10397500  |
| C | -1.18519700 | -5.99054600 | -1.57914900 |
| H | 0.58461800  | -4.93204100 | -2.21515900 |
| H | -2.97154000 | -6.82050600 | -0.69879100 |
| H | -1.13251100 | -6.72825200 | -2.37549800 |
| C | -0.36491500 | 0.70510600  | 2.90450100  |
| C | -1.00047100 | 1.00668500  | 4.11820400  |
| C | 0.09512800  | 1.77453500  | 2.11633300  |
| C | -1.17953700 | 2.33203300  | 4.52507700  |
| H | -1.35166500 | 0.20691400  | 4.76317900  |
| C | -0.08705800 | 3.09762100  | 2.51638200  |
| H | 0.60238200  | 1.56409500  | 1.17751200  |
| C | -0.72891700 | 3.38260400  | 3.72503200  |
| H | -1.66932300 | 2.53966200  | 5.47332700  |
| H | 0.27323300  | 3.90319500  | 1.88328500  |
| H | -0.86758700 | 4.41259700  | 4.04324300  |
| C | -5.41697500 | -0.80342200 | -0.88556800 |
| C | -6.47052600 | -1.04822100 | 0.00740700  |
| C | -4.76479700 | -1.90992800 | -1.45809600 |
| C | -6.85556300 | -2.35484300 | 0.32236900  |
| H | -7.01014100 | -0.21988100 | 0.45609800  |
| C | -5.14317500 | -3.21375400 | -1.14171100 |
| H | -3.94441600 | -1.74305100 | -2.15301600 |
| C | -6.19297200 | -3.44208100 | -0.24710800 |

|   |             |             |             |
|---|-------------|-------------|-------------|
| H | -7.68001700 | -2.51844600 | 1.01186700  |
| H | -4.61387900 | -4.04916600 | -1.59038200 |
| H | -6.49504100 | -4.45717000 | -0.00332100 |
| C | -2.79453400 | 3.97261200  | -0.72024700 |
| C | -2.45021800 | 5.00403400  | 0.16407500  |
| C | -2.15273200 | 3.92755200  | -1.96821500 |
| C | -1.50039900 | 5.96712800  | -0.18526100 |
| H | -2.93344600 | 5.05445600  | 1.13736400  |
| C | -1.20582500 | 4.88837900  | -2.32261900 |
| H | -2.38664500 | 3.12760800  | -2.66668600 |
| C | -0.87608100 | 5.91388600  | -1.43171800 |
| H | -1.25360600 | 6.76001300  | 0.51634100  |
| H | -0.71962700 | 4.83245800  | -3.29274100 |
| H | -0.13923900 | 6.66280100  | -1.70919000 |
| C | -0.57806200 | -0.36571000 | -2.96509000 |
| H | -1.43064600 | -0.11056900 | -3.60520100 |
| H | -0.21265300 | -1.36518000 | -3.21552200 |
| C | 2.68741600  | 1.72539700  | -2.85330100 |
| C | 4.04348100  | 1.60263000  | -3.23810800 |
| C | 2.24629600  | 3.02936900  | -2.52073200 |
| C | 4.89055500  | 2.70907800  | -3.31562300 |
| H | 4.43203800  | 0.62720500  | -3.51606500 |
| C | 3.08826600  | 4.13346700  | -2.60827900 |
| H | 1.23032200  | 3.17153700  | -2.16532300 |
| C | 4.42185100  | 3.98866300  | -3.00935400 |
| H | 5.92182500  | 2.56936700  | -3.63358200 |
| H | 2.70411800  | 5.11674900  | -2.34370100 |
| H | 5.07782100  | 4.85262900  | -3.08126900 |
| C | 2.40928600  | -0.82198100 | -2.65769500 |
| H | 1.75437000  | -1.46879700 | -2.06214600 |
| H | 2.57099700  | -1.33093700 | -3.62110800 |
| H | 3.37971400  | -0.78371700 | -2.14999600 |
| C | 3.74630900  | -2.04814100 | 0.63021300  |
| O | 2.57042700  | -2.26246400 | 0.81443200  |
| H | 0.05948000  | 1.69017600  | -3.11763900 |
| O | 4.35454800  | -0.86538900 | 1.01120100  |
| C | 4.68214100  | -2.96321000 | -0.06610300 |
| C | 4.16753200  | -4.17125700 | -0.56274700 |
| C | 6.04308100  | -2.66313800 | -0.22854400 |
| C | 5.00681900  | -5.06872900 | -1.21596300 |
| H | 3.11373000  | -4.38959700 | -0.42472800 |
| C | 6.87827100  | -3.56539800 | -0.88492300 |
| H | 6.43693300  | -1.72968000 | 0.15688600  |
| C | 6.36232300  | -4.76624100 | -1.37858900 |

|   |            |             |             |
|---|------------|-------------|-------------|
| H | 4.60702300 | -6.00322800 | -1.59902800 |
| H | 7.93155100 | -3.33189600 | -1.01135300 |
| H | 7.01651300 | -5.46723800 | -1.89007900 |
| C | 3.89819200 | -0.16402500 | 2.13317000  |
| O | 3.39959900 | -0.72480800 | 3.07743500  |
| C | 4.17493400 | 1.28527100  | 2.02680300  |
| C | 4.00450800 | 2.06207900  | 3.18479100  |
| C | 4.56697700 | 1.89318400  | 0.82429600  |
| C | 4.23856400 | 3.43238200  | 3.14193600  |
| H | 3.68827900 | 1.57385600  | 4.10051300  |
| C | 4.78673600 | 3.26957600  | 0.78456700  |
| H | 4.67808400 | 1.30298500  | -0.07802700 |
| C | 4.62924700 | 4.03604800  | 1.94166700  |
| H | 4.11193600 | 4.03180000  | 4.03908600  |
| H | 5.06258500 | 3.73632000  | -0.15558100 |
| H | 4.80476100 | 5.10826600  | 1.90786000  |

### Int3\_a3

|    |             |             |             |
|----|-------------|-------------|-------------|
| C  | 3.42984200  | -1.28054200 | 1.20109200  |
| C  | 2.58257600  | -2.47551100 | 0.72516100  |
| H  | 4.25042300  | -1.10098000 | 0.49671900  |
| H  | 3.88054600  | -1.51137100 | 2.17299900  |
| H  | 1.88028600  | -2.76304600 | 1.51695200  |
| H  | 3.23584000  | -3.33965500 | 0.54799300  |
| P  | 1.52288000  | -2.11130800 | -0.78720300 |
| P  | 2.49100000  | 0.33850500  | 1.27365600  |
| C  | 0.59816600  | 1.48719600  | -2.30944400 |
| C  | -0.85568100 | 1.52909500  | -2.47083800 |
| H  | 1.00601400  | 2.49171300  | -2.14489300 |
| C  | -2.13748600 | 1.87932100  | 1.22215900  |
| C  | -1.68484600 | 0.72456400  | -3.19913100 |
| Cu | 1.13356900  | 0.38083400  | -0.69006600 |
| O  | -1.22209700 | 1.09558900  | 1.31510200  |
| C  | 0.52204000  | -3.74475100 | -0.92460900 |
| H  | 0.93044300  | -4.38372900 | -0.12884300 |
| C  | 2.64784200  | -2.57735300 | -2.26017400 |
| H  | 2.16482400  | -2.06729200 | -3.10404700 |
| C  | 1.70622400  | 0.50958600  | 3.01552700  |
| H  | 0.78237400  | 1.05519500  | 2.79949800  |
| C  | 3.88832800  | 1.56070200  | 1.67180900  |
| H  | 4.69631800  | 0.95686800  | 2.10779100  |
| C  | -1.13737300 | -0.44884900 | -3.98219800 |
| H  | -1.27543500 | -1.40296100 | -3.44958400 |

|   |             |             |             |
|---|-------------|-------------|-------------|
| H | -1.62617800 | -0.55324600 | -4.95978000 |
| H | -0.06445100 | -0.33389400 | -4.16255400 |
| C | -3.14375300 | 0.93982400  | -3.22817800 |
| C | -4.02562000 | -0.08906400 | -3.63225000 |
| C | -3.74220100 | 2.18254500  | -2.90468500 |
| C | -5.40482100 | 0.10622200  | -3.70709600 |
| H | -3.62365500 | -1.06544000 | -3.88261700 |
| C | -5.11930300 | 2.37498900  | -2.96847600 |
| H | -3.11094600 | 3.02458500  | -2.63780600 |
| C | -5.96928600 | 1.33953400  | -3.37613700 |
| H | -6.04177300 | -0.71486300 | -4.02998700 |
| H | -5.53183900 | 3.35244800  | -2.72643900 |
| H | -7.04162800 | 1.50104200  | -3.45493700 |
| H | -1.33883600 | 2.30722300  | -1.87827000 |
| H | 1.12727600  | 1.02431000  | -3.15176600 |
| C | 2.44439400  | -4.09009100 | -2.45695000 |
| C | 0.94708200  | -4.35416600 | -2.27608800 |
| H | 2.80443800  | -4.41234900 | -3.44205100 |
| H | 3.00594100  | -4.66090000 | -1.70645400 |
| H | 0.70685000  | -5.42361600 | -2.31702200 |
| H | 0.40247700  | -3.86921300 | -3.09555700 |
| C | 3.29724600  | 2.41940300  | 2.81501500  |
| C | 2.64703900  | 1.45057600  | 3.80624200  |
| H | 2.08775900  | 1.97356800  | 4.59145200  |
| H | 3.43332200  | 0.87344400  | 4.30755100  |
| H | 4.07994200  | 3.02852900  | 3.28283200  |
| H | 2.54886300  | 3.11406300  | 2.41056100  |
| C | -0.96982300 | -3.60032200 | -0.67893200 |
| C | -1.42144400 | -3.16155400 | 0.57637500  |
| C | -1.93100100 | -3.91759100 | -1.64836400 |
| C | -2.78100800 | -3.02988800 | 0.84928700  |
| H | -0.70210200 | -2.91485400 | 1.35366100  |
| C | -3.29647900 | -3.78948200 | -1.37624600 |
| H | -1.62547300 | -4.27609600 | -2.62599300 |
| C | -3.72853700 | -3.34222600 | -0.12921100 |
| H | -3.09855200 | -2.67172500 | 1.82432100  |
| H | -4.02055900 | -4.03990800 | -2.14734400 |
| H | -4.78870700 | -3.23228400 | 0.08019100  |
| C | 4.06674400  | -2.06022300 | -2.16664000 |
| C | 5.14324400  | -2.86212800 | -1.75900900 |
| C | 4.32676000  | -0.71484600 | -2.48217800 |
| C | 6.43440400  | -2.33499700 | -1.66262200 |
| H | 4.98552700  | -3.91028400 | -1.52373500 |
| C | 5.61211400  | -0.18488700 | -2.38012800 |

|   |             |             |             |
|---|-------------|-------------|-------------|
| H | 3.50608900  | -0.07568500 | -2.79908000 |
| C | 6.67388000  | -0.99522800 | -1.96799200 |
| H | 7.25340500  | -2.97850800 | -1.35088700 |
| H | 5.78146900  | 0.86157400  | -2.61606800 |
| H | 7.67767900  | -0.58604700 | -1.89120500 |
| C | 1.31592100  | -0.77571100 | 3.71515400  |
| C | 2.24509400  | -1.57521100 | 4.40217400  |
| C | -0.02780300 | -1.18723300 | 3.69999800  |
| C | 1.84896600  | -2.75071000 | 5.04313600  |
| H | 3.28896900  | -1.27732200 | 4.45354800  |
| C | -0.42464800 | -2.35987100 | 4.34602600  |
| H | -0.77039400 | -0.57998500 | 3.19009100  |
| C | 0.51146400  | -3.14986000 | 5.01666000  |
| H | 2.58731600  | -3.35007200 | 5.56992700  |
| H | -1.47309400 | -2.64549300 | 4.33093600  |
| H | 0.20154200  | -4.06105100 | 5.52142900  |
| C | 4.47293000  | 2.35883300  | 0.52576100  |
| C | 5.86565900  | 2.45736700  | 0.39267000  |
| C | 3.66865900  | 3.05831600  | -0.38729400 |
| C | 6.44206700  | 3.23363300  | -0.61474800 |
| H | 6.50675900  | 1.92179900  | 1.08979100  |
| C | 4.24076200  | 3.83051500  | -1.39901500 |
| H | 2.58787800  | 2.97534900  | -0.32645400 |
| C | 5.62998100  | 3.92404800  | -1.51615100 |
| H | 7.52440800  | 3.29709000  | -0.69411900 |
| H | 3.59772600  | 4.35475400  | -2.10115500 |
| H | 6.07381500  | 4.52812600  | -2.30307000 |
| O | -3.46743500 | 1.49644400  | 1.30197000  |
| C | -3.86749600 | 0.38946700  | 2.04428200  |
| O | -3.25010800 | -0.01491300 | 3.00008100  |
| C | -5.16067900 | -0.14817600 | 1.56086900  |
| C | -5.69608100 | 0.19738800  | 0.31126900  |
| C | -5.84022900 | -1.05322200 | 2.39267400  |
| C | -6.90307900 | -0.36708300 | -0.10027300 |
| H | -5.16859900 | 0.88382900  | -0.34179600 |
| C | -7.04929900 | -1.60443200 | 1.97953600  |
| H | -5.40732300 | -1.30717600 | 3.35486900  |
| C | -7.58056700 | -1.26215800 | 0.73073100  |
| H | -7.30062200 | -0.10846400 | -1.07643000 |
| H | -7.57802300 | -2.29913200 | 2.62621700  |
| H | -8.52291300 | -1.69623300 | 0.40658600  |
| C | -2.00034700 | 3.33288600  | 0.96117100  |
| C | -3.08997000 | 4.21411300  | 1.02890900  |
| C | -0.72145100 | 3.82348400  | 0.65350300  |

|   |             |            |            |
|---|-------------|------------|------------|
| C | -2.89578600 | 5.57514200 | 0.79965400 |
| H | -4.07732100 | 3.83119500 | 1.26001900 |
| C | -0.53485000 | 5.18299300 | 0.42004900 |
| H | 0.10234200  | 3.12085500 | 0.57945600 |
| C | -1.62104800 | 6.06027400 | 0.49619400 |
| H | -3.73931800 | 6.25727600 | 0.85544800 |
| H | 0.45408400  | 5.55937500 | 0.17415900 |
| H | -1.47440000 | 7.12166000 | 0.31470500 |

### Int3\_a4

|    |             |             |             |
|----|-------------|-------------|-------------|
| C  | -3.99337700 | -0.34180600 | 0.42652300  |
| C  | -3.27082000 | -1.56402400 | 1.02710100  |
| H  | -4.02612200 | 0.46312000  | 1.16843800  |
| H  | -5.03380000 | -0.62093000 | 0.21341800  |
| H  | -3.38420300 | -2.42869800 | 0.36341800  |
| H  | -3.74691400 | -1.82809500 | 1.98049900  |
| P  | -1.42507800 | -1.39413000 | 1.29541900  |
| P  | -3.18364600 | 0.42609500  | -1.08886400 |
| C  | 3.21435700  | -0.18274900 | 2.04435700  |
| C  | 1.75717700  | 0.10015100  | -2.52063100 |
| Cu | -0.36350700 | -0.69466200 | -0.64823700 |
| C  | -1.00532100 | -3.10794900 | 2.01371400  |
| H  | -1.97380400 | -3.59480400 | 2.18861200  |
| C  | -1.21733400 | -0.51262500 | 2.97653100  |
| H  | -0.21162100 | -0.08610300 | 2.89947400  |
| C  | -3.99701900 | -0.51689800 | -2.54966300 |
| H  | -3.31350400 | -0.31187300 | -3.38475600 |
| C  | -4.34048200 | 1.93711900  | -1.32114500 |
| H  | -5.11327700 | 1.86812700  | -0.54478300 |
| C  | 3.02127100  | -0.41067200 | -2.58964600 |
| C  | -1.16651700 | -1.65070900 | 4.01696700  |
| C  | -0.37349000 | -2.80164900 | 3.39434400  |
| H  | -0.71318500 | -1.29614300 | 4.95064700  |
| H  | -2.17598200 | -2.00403200 | 4.26302400  |
| H  | -0.38446200 | -3.70046600 | 4.02282600  |
| H  | 0.67245900  | -2.50054700 | 3.27132000  |
| C  | -5.02408000 | 1.71901400  | -2.69562100 |
| C  | -5.31560400 | 0.22316800  | -2.83871200 |
| H  | -5.70478400 | -0.02998800 | -3.83340100 |
| H  | -6.08745100 | -0.06008400 | -2.11166100 |
| H  | -5.93072000 | 2.33095700  | -2.77792500 |
| H  | -4.34893700 | 2.04390200  | -3.49799000 |
| C  | -0.17692100 | -4.01312500 | 1.12926200  |

|   |              |              |              |
|---|--------------|--------------|--------------|
| C | 1. 13962400  | -3. 68343500 | 0. 76977700  |
| C | -0. 70439100 | -5. 22970300 | 0. 67531600  |
| C | 1. 90552800  | -4. 54931300 | -0. 01052100 |
| H | 1. 56953500  | -2. 74278300 | 1. 10220100  |
| C | 0. 05798300  | -6. 09699800 | -0. 11095000 |
| H | -1. 72301200 | -5. 50234800 | 0. 94288100  |
| C | 1. 36754900  | -5. 76005500 | -0. 45507100 |
| H | 2. 92280900  | -4. 27354600 | -0. 27332500 |
| H | -0. 37105600 | -7. 03759100 | -0. 44745900 |
| H | 1. 96503000  | -6. 43352000 | -1. 06377800 |
| C | -2. 19084800 | 0. 61753200  | 3. 24137200  |
| C | -3. 37170700 | 0. 44745200  | 3. 98088900  |
| C | -1. 91465700 | 1. 89599500  | 2. 72580200  |
| C | -4. 24903800 | 1. 51442200  | 4. 19243200  |
| H | -3. 61501600 | -0. 52049900 | 4. 40803500  |
| C | -2. 79126400 | 2. 96088600  | 2. 93169600  |
| H | -1. 00356600 | 2. 04556500  | 2. 15355100  |
| C | -3. 96515500 | 2. 77515900  | 3. 66687700  |
| H | -5. 15391000 | 1. 35662000  | 4. 77411900  |
| H | -2. 55724900 | 3. 93631500  | 2. 51451900  |
| H | -4. 64636000 | 3. 60544200  | 3. 83396500  |
| C | -4. 05539300 | -2. 01898500 | -2. 37294100 |
| C | -5. 22611800 | -2. 69895200 | -2. 00527500 |
| C | -2. 88478600 | -2. 77521400 | -2. 56316300 |
| C | -5. 22582700 | -4. 08545400 | -1. 82555600 |
| H | -6. 15435700 | -2. 15334400 | -1. 86636900 |
| C | -2. 88083600 | -4. 15718000 | -2. 37940000 |
| H | -1. 96535500 | -2. 26797100 | -2. 84504000 |
| C | -4. 05429500 | -4. 82008600 | -2. 00769100 |
| H | -6. 14817200 | -4. 58918600 | -1. 54688800 |
| H | -1. 95922300 | -4. 71433300 | -2. 52190800 |
| H | -4. 05565100 | -5. 89813400 | -1. 86990100 |
| C | -3. 65791900 | 3. 28290300  | -1. 19238600 |
| C | -4. 17480300 | 4. 26225600  | -0. 33258000 |
| C | -2. 52446300 | 3. 60618000  | -1. 95616300 |
| C | -3. 58916900 | 5. 52737800  | -0. 24223100 |
| H | -5. 04935400 | 4. 03128900  | 0. 27151400  |
| C | -1. 93800400 | 4. 86925800  | -1. 87309100 |
| H | -2. 09275000 | 2. 85990500  | -2. 61871700 |
| C | -2. 46978900 | 5. 83750200  | -1. 01589100 |
| H | -4. 01347100 | 6. 27146600  | 0. 42727800  |
| H | -1. 06610300 | 5. 09733000  | -2. 48088100 |
| H | -2. 02013800 | 6. 82555200  | -0. 95799000 |
| O | 2. 33806500  | -0. 51598600 | 2. 80801400  |

|   |             |             |             |
|---|-------------|-------------|-------------|
| C | 0.46862800  | -0.59592400 | -2.47877200 |
| H | -0.29303100 | -0.03322500 | -3.03460400 |
| H | 0.50732100  | -1.61973800 | -2.86560400 |
| O | 3.24254000  | 1.06829800  | 1.43585300  |
| C | 4.20794100  | 0.46339800  | -2.65886600 |
| C | 5.43688200  | -0.01998200 | -3.16655400 |
| C | 4.20242200  | 1.80975600  | -2.22057500 |
| C | 6.57238000  | 0.78752200  | -3.24634600 |
| H | 5.49857500  | -1.04240800 | -3.52559300 |
| C | 5.33468800  | 2.61594400  | -2.30166100 |
| H | 3.29727100  | 2.22837100  | -1.79204800 |
| C | 6.53534400  | 2.11451000  | -2.81526000 |
| H | 7.49146800  | 0.37445600  | -3.65731500 |
| H | 5.28037600  | 3.64280100  | -1.94620400 |
| H | 7.41990000  | 2.74318400  | -2.87394500 |
| C | 3.24822500  | -1.90628700 | -2.66916200 |
| H | 2.38141000  | -2.45632300 | -2.29443900 |
| H | 3.43295800  | -2.25347500 | -3.69798800 |
| H | 4.11551000  | -2.21456200 | -2.07066300 |
| C | 4.40809000  | -0.98584300 | 1.69588800  |
| C | 5.28680200  | -0.61159600 | 0.66785900  |
| C | 4.63458600  | -2.16902900 | 2.41931200  |
| C | 6.38126300  | -1.42151600 | 0.36654600  |
| H | 5.10541100  | 0.28960600  | 0.09441400  |
| C | 5.73445400  | -2.96662400 | 2.11976800  |
| H | 3.94223500  | -2.44325700 | 3.20840200  |
| C | 6.60800300  | -2.59322900 | 1.09222100  |
| H | 7.04526400  | -1.13532100 | -0.44316300 |
| H | 5.91128900  | -3.87901500 | 2.68222500  |
| H | 7.46397900  | -3.22004000 | 0.85606700  |
| C | 2.08329400  | 1.76900900  | 1.15108700  |
| O | 1.00270900  | 1.23802100  | 1.03193800  |
| C | 2.34616900  | 3.21676500  | 0.96839300  |
| C | 1.28881900  | 4.02041400  | 0.51215400  |
| C | 3.59401600  | 3.79509900  | 1.24860400  |
| C | 1.47739100  | 5.38927500  | 0.34499500  |
| H | 0.33240100  | 3.56067900  | 0.28627500  |
| C | 3.77499000  | 5.16692700  | 1.08164900  |
| H | 4.41055500  | 3.17178600  | 1.59405100  |
| C | 2.71919600  | 5.96422800  | 0.63147000  |
| H | 0.65472900  | 6.00391000  | -0.00836000 |
| H | 4.74005900  | 5.61401100  | 1.30233500  |
| H | 2.86535400  | 7.03330000  | 0.50181500  |
| H | 1.67083800  | 1.18807000  | -2.51283900 |



**Int3\_b1**

|    |             |             |             |
|----|-------------|-------------|-------------|
| C  | 0.79871500  | -3.27799000 | 1.14689900  |
| C  | -0.71344800 | -3.38683400 | 0.87140200  |
| H  | 1.35943100  | -3.73882100 | 0.32547600  |
| H  | 1.04683000  | -3.83505000 | 2.05938900  |
| H  | -1.27081000 | -3.12753400 | 1.77903200  |
| H  | -0.96161100 | -4.42842100 | 0.62857100  |
| P  | -1.37039900 | -2.21585000 | -0.44565000 |
| P  | 1.45604200  | -1.52898700 | 1.26010700  |
| C  | 0.65170000  | 0.53814800  | -2.35108900 |
| C  | 0.38335000  | 1.97210700  | -2.40320300 |
| H  | 1.69771600  | 0.32027800  | -2.59791900 |
| C  | -0.17328300 | 2.76975900  | 1.05250700  |
| C  | -0.72755900 | 2.71747000  | -2.69629800 |
| Cu | 0.48934100  | -0.27374100 | -0.48474800 |
| O  | -0.18158500 | 1.55828200  | 1.06027800  |
| C  | -3.23668700 | -2.64147300 | -0.33753100 |
| H  | -3.30511400 | -3.52386200 | 0.31232000  |
| C  | -1.16833600 | -3.17888100 | -2.09538300 |
| H  | -1.15634200 | -2.37223000 | -2.83918500 |
| C  | 1.23542900  | -0.97277400 | 3.07620200  |
| H  | 1.17000000  | 0.11590100  | 2.97868400  |
| C  | 3.31996900  | -1.85133500 | 1.47153000  |
| H  | 3.40990200  | -2.92129000 | 1.70262900  |
| C  | -1.35288700 | 3.64026800  | 1.23280000  |
| C  | -1.24127100 | 5.03394400  | 1.37125500  |
| C  | -2.61708600 | 3.03149200  | 1.29789300  |
| C  | -2.38236200 | 5.80522700  | 1.58257300  |
| H  | -0.26548200 | 5.50291900  | 1.32149700  |
| C  | -3.75191400 | 3.80877100  | 1.50931100  |
| H  | -2.69682800 | 1.95697400  | 1.17394100  |
| C  | -3.63723200 | 5.19487900  | 1.65407000  |
| H  | -2.29238500 | 6.88215200  | 1.69300500  |
| H  | -4.72484700 | 3.32980700  | 1.56129000  |
| H  | -4.52510900 | 5.79900700  | 1.82075600  |
| H  | 1.24373400  | 2.57240900  | -2.09309300 |
| H  | -0.00597400 | -0.08499100 | -2.95705200 |
| O  | 0.98826600  | 3.51224900  | 0.85021200  |
| C  | 2.23668600  | 3.03766600  | 1.20591600  |
| O  | 2.40624700  | 2.17222400  | 2.03428700  |
| C  | 3.31970400  | 3.77205900  | 0.50439300  |
| C  | 4.64524500  | 3.48392100  | 0.86658400  |

|   |              |              |              |
|---|--------------|--------------|--------------|
| C | 3. 06006200  | 4. 72716000  | -0. 49058100 |
| C | 5. 69879900  | 4. 14025200  | 0. 23644300  |
| H | 4. 82926800  | 2. 74565000  | 1. 63966800  |
| C | 4. 11919300  | 5. 38004300  | -1. 11902800 |
| H | 2. 03668100  | 4. 94762300  | -0. 77024000 |
| C | 5. 43679200  | 5. 08834500  | -0. 75745900 |
| H | 6. 72310000  | 3. 91390000  | 0. 51830300  |
| H | 3. 91573900  | 6. 11446300  | -1. 89291700 |
| H | 6. 25984100  | 5. 59924000  | -1. 24987800 |
| C | -2. 47904300 | -3. 96691100 | -2. 28719400 |
| C | -3. 61733800 | -3. 08548800 | -1. 76993200 |
| H | -2. 61524000 | -4. 24862400 | -3. 33903300 |
| H | -2. 46284300 | -4. 89782700 | -1. 70679100 |
| H | -4. 58051800 | -3. 61056000 | -1. 76476900 |
| H | -3. 73555100 | -2. 20608300 | -2. 41565400 |
| C | 3. 69184100  | -1. 06353700 | 2. 75129000  |
| C | 2. 57395400  | -1. 30139700 | 3. 77115500  |
| H | 2. 70036600  | -0. 68672900 | 4. 67083600  |
| H | 2. 60197300  | -2. 34996600 | 4. 09269400  |
| H | 4. 67050300  | -1. 38694800 | 3. 12668900  |
| H | 3. 76183200  | 0. 00584200  | 2. 52317400  |
| C | -4. 13950700 | -1. 57042400 | 0. 23219500  |
| C | -4. 89668900 | -1. 83002600 | 1. 38413800  |
| C | -4. 29712400 | -0. 32625900 | -0. 39933400 |
| C | -5. 79541000 | -0. 88660500 | 1. 88724100  |
| H | -4. 78644600 | -2. 78758000 | 1. 88854200  |
| C | -5. 20227000 | 0. 61386600  | 0. 09448800  |
| H | -3. 72090000 | -0. 08610800 | -1. 28879600 |
| C | -5. 95638600 | 0. 33874300  | 1. 23901000  |
| H | -6. 37713500 | -1. 11599500 | 2. 77671600  |
| H | -5. 31676800 | 1. 55882600  | -0. 42859700 |
| H | -6. 66865200 | 1. 06834200  | 1. 61654500  |
| C | 0. 12668800  | -3. 94957900 | -2. 23931400 |
| C | 0. 24065200  | -5. 31257100 | -1. 92270500 |
| C | 1. 27802600  | -3. 28079600 | -2. 69111800 |
| C | 1. 46141800  | -5. 98110800 | -2. 04757100 |
| H | -0. 62729900 | -5. 86975500 | -1. 58357700 |
| C | 2. 49874400  | -3. 94420600 | -2. 81122600 |
| H | 1. 21482400  | -2. 22499400 | -2. 94031000 |
| C | 2. 59639800  | -5. 30039900 | -2. 48899200 |
| H | 1. 52022100  | -7. 03868100 | -1. 80193800 |
| H | 3. 37375800  | -3. 39791500 | -3. 15125100 |
| H | 3. 54514800  | -5. 82147300 | -2. 58709100 |
| C | -0. 03064800 | -1. 46306500 | 3. 74517700  |

|   |             |             |             |
|---|-------------|-------------|-------------|
| C | -0.08914100 | -2.65234800 | 4.48931800  |
| C | -1.21323900 | -0.71559200 | 3.60652000  |
| C | -1.28547300 | -3.08165200 | 5.06917400  |
| H | 0.80420200  | -3.25337600 | 4.63098700  |
| C | -2.41003200 | -1.14445400 | 4.18051000  |
| H | -1.19054100 | 0.20566600  | 3.03075300  |
| C | -2.45217600 | -2.33191500 | 4.91575600  |
| H | -1.30115500 | -4.00389200 | 5.64478500  |
| H | -3.31087800 | -0.55213100 | 4.04734600  |
| H | -3.38231000 | -2.66553900 | 5.36833200  |
| C | 4.19225300  | -1.55403200 | 0.27237800  |
| C | 4.99183100  | -2.56217500 | -0.28325500 |
| C | 4.25857300  | -0.26884400 | -0.28939600 |
| C | 5.83578800  | -2.29988100 | -1.36531000 |
| H | 4.95520700  | -3.56455700 | 0.13800400  |
| C | 5.10031100  | -0.00274300 | -1.36897100 |
| H | 3.64257600  | 0.52639100  | 0.11856000  |
| C | 5.89283600  | -1.01759700 | -1.91267700 |
| H | 6.44991700  | -3.09761500 | -1.77584100 |
| H | 5.13652200  | 1.00051700  | -1.78525300 |
| H | 6.54843400  | -0.80910300 | -2.75409700 |
| C | -2.02461900 | 2.17651300  | -3.15890100 |
| C | -2.12858300 | 1.06020900  | -4.01917000 |
| C | -3.23632400 | 2.81412600  | -2.80796200 |
| C | -3.36239200 | 0.59351000  | -4.47104800 |
| H | -1.22217700 | 0.58447100  | -4.37461700 |
| C | -4.47178000 | 2.34927000  | -3.26069700 |
| H | -3.21043600 | 3.68751400  | -2.16343700 |
| C | -4.54840500 | 1.22868800  | -4.09011900 |
| H | -3.39562600 | -0.25818700 | -5.14758600 |
| H | -5.38021200 | 2.87243500  | -2.96860800 |
| H | -5.50957200 | 0.86794500  | -4.44681300 |
| C | -0.65698200 | 4.22773100  | -2.54285000 |
| H | 0.38217400  | 4.55093700  | -2.41252200 |
| H | -1.05377400 | 4.74505800  | -3.42775200 |
| H | -1.22228400 | 4.61292600  | -1.68018300 |

### Int3\_b2

|   |             |             |            |
|---|-------------|-------------|------------|
| C | -3.66326500 | -1.39563500 | 0.57457700 |
| C | -2.56956000 | -2.29483100 | 1.18603300 |
| H | -3.94549700 | -0.62295200 | 1.29774500 |
| H | -4.55792000 | -2.00797000 | 0.39872700 |
| H | -2.41170300 | -3.17398300 | 0.55132700 |

|    |             |             |             |
|----|-------------|-------------|-------------|
| H  | -2.91639300 | -2.66477200 | 2.16021900  |
| P  | -0.86864800 | -1.53926800 | 1.39814000  |
| P  | -3.18277200 | -0.45130700 | -0.97994700 |
| C  | 1.07263400  | 1.25418400  | -2.54490600 |
| Cu | -0.09927700 | -0.52189900 | -0.55061800 |
| C  | 0.07785900  | -3.00732600 | 2.16335200  |
| H  | -0.68456600 | -3.77481100 | 2.35076900  |
| C  | -0.92846700 | -0.57727100 | 3.04561300  |
| H  | -0.09079600 | 0.12101600  | 2.94104800  |
| C  | -3.62863000 | -1.67006200 | -2.39756100 |
| H  | -3.05781200 | -1.27447400 | -3.24846800 |
| C  | -4.79657900 | 0.55309500  | -1.23552800 |
| H  | -5.49508000 | 0.23794800  | -0.44960000 |
| C  | 2.34703800  | 1.72687900  | -2.72374900 |
| C  | -0.54548600 | -1.61276400 | 4.12222600  |
| C  | 0.56813700  | -2.48207100 | 3.53537200  |
| H  | -0.23157000 | -1.10985900 | 5.04502600  |
| H  | -1.40120100 | -2.25070500 | 4.37797600  |
| H  | 0.82865000  | -3.32243800 | 4.19016000  |
| H  | 1.47158600  | -1.87616100 | 3.40681500  |
| C  | -5.36145600 | 0.07305800  | -2.59624300 |
| C  | -5.12145800 | -1.43517100 | -2.69260200 |
| H  | -5.40102200 | -1.83824600 | -3.67456300 |
| H  | -5.74878000 | -1.94199200 | -1.94842100 |
| H  | -6.42316400 | 0.33339500  | -2.68773700 |
| H  | -4.83833100 | 0.58509700  | -3.41427900 |
| C  | 1.15889000  | -3.62084100 | 1.30151800  |
| C  | 2.34246000  | -2.92691600 | 1.00473700  |
| C  | 1.01241600  | -4.92369700 | 0.80601500  |
| C  | 3.35097000  | -3.52291800 | 0.24799500  |
| H  | 2.48227700  | -1.91502800 | 1.37384900  |
| C  | 2.01706000  | -5.52134400 | 0.04125400  |
| H  | 0.10241400  | -5.47812500 | 1.02459700  |
| C  | 3.19244100  | -4.82327900 | -0.23843100 |
| H  | 4.26055600  | -2.96666700 | 0.04018900  |
| H  | 1.88282800  | -6.53539800 | -0.32707100 |
| H  | 3.97909200  | -5.28781500 | -0.82702400 |
| C  | -2.18793400 | 0.22955800  | 3.28388500  |
| C  | -3.25742700 | -0.24093500 | 4.06149400  |
| C  | -2.30501000 | 1.50541300  | 2.70500900  |
| C  | -4.40671700 | 0.53201700  | 4.24742500  |
| H  | -3.20002400 | -1.21412200 | 4.53893300  |
| C  | -3.45260700 | 2.27659200  | 2.88569200  |
| H  | -1.48414300 | 1.88525200  | 2.10371200  |

|   |             |             |             |
|---|-------------|-------------|-------------|
| C | -4.51159200 | 1.79220800  | 3.65840900  |
| H | -5.21831800 | 0.14645500  | 4.85960500  |
| H | -3.52080100 | 3.25502400  | 2.41865400  |
| H | -5.40449600 | 2.39411900  | 3.80583900  |
| C | -3.17509400 | -3.09695000 | -2.17585600 |
| C | -4.04179700 | -4.11161800 | -1.74194900 |
| C | -1.82613000 | -3.43083100 | -2.39351400 |
| C | -3.57693400 | -5.41219200 | -1.52671500 |
| H | -5.09362600 | -3.89854600 | -1.57839300 |
| C | -1.35911900 | -4.72626800 | -2.17525500 |
| H | -1.13438000 | -2.66109700 | -2.72696900 |
| C | -2.23444200 | -5.72539800 | -1.73948600 |
| H | -4.27131000 | -6.18125600 | -1.19730100 |
| H | -0.30998600 | -4.95273700 | -2.34259900 |
| H | -1.87456400 | -6.73786200 | -1.57619300 |
| C | -4.62689800 | 2.05510300  | -1.14610600 |
| C | -5.42159400 | 2.80918300  | -0.27145500 |
| C | -3.70719900 | 2.73915600  | -1.95790500 |
| C | -5.31219400 | 4.20069200  | -0.21180300 |
| H | -6.13671100 | 2.29927400  | 0.37016100  |
| C | -3.59691200 | 4.12883300  | -1.90558100 |
| H | -3.06808300 | 2.17902400  | -2.63626700 |
| C | -4.40088000 | 4.86727300  | -1.03183700 |
| H | -5.94481500 | 4.76237000  | 0.47102700  |
| H | -2.88404600 | 4.63496800  | -2.55170400 |
| H | -4.32108400 | 5.95070400  | -0.99568700 |
| C | 0.48439000  | -0.08033900 | -2.43695500 |
| H | -0.50323500 | -0.08503600 | -2.91766600 |
| H | 1.08840000  | -0.89286300 | -2.84824700 |
| C | 3.18643900  | 1.02187000  | 1.96592200  |
| O | 2.44327900  | 0.60273600  | 2.82429500  |
| H | 0.32109500  | 2.04629200  | -2.48442800 |
| C | 3.56055900  | 0.89921800  | -2.84775300 |
| C | 4.73527200  | 1.42846400  | -3.43624200 |
| C | 3.64052600  | -0.43704500 | -2.38583400 |
| C | 5.89090500  | 0.66490300  | -3.59628600 |
| H | 4.73963500  | 2.45173000  | -3.79610600 |
| C | 4.79519300  | -1.19954700 | -2.55202000 |
| H | 2.79822400  | -0.87371200 | -1.86532300 |
| C | 5.92978300  | -0.66296500 | -3.16553000 |
| H | 6.76252900  | 1.11028800  | -4.07157000 |
| H | 4.80515900  | -2.22674900 | -2.19521100 |
| H | 6.82482500  | -1.26483100 | -3.30140200 |
| C | 2.52303400  | 3.22453000  | -2.91038000 |

|   |              |              |              |
|---|--------------|--------------|--------------|
| H | 3. 30488500  | 3. 64451500  | -2. 26082600 |
| H | 2. 80220500  | 3. 48809500  | -3. 94197100 |
| H | 1. 59247000  | 3. 75502200  | -2. 68716600 |
| C | 4. 58962500  | 0. 59011200  | 1. 76288400  |
| C | 5. 32602600  | 0. 93623100  | 0. 61979200  |
| C | 5. 17367700  | -0. 20916700 | 2. 75977300  |
| C | 6. 63644600  | 0. 48109600  | 0. 47885400  |
| H | 4. 86963700  | 1. 52937300  | -0. 16351800 |
| C | 6. 48580700  | -0. 64931600 | 2. 61824900  |
| H | 4. 58651200  | -0. 46885300 | 3. 63446900  |
| C | 7. 21750400  | -0. 30460100 | 1. 47667400  |
| H | 7. 19204100  | 0. 72919100  | -0. 41979700 |
| H | 6. 93855100  | -1. 26193600 | 3. 39276900  |
| H | 8. 24027600  | -0. 65459500 | 1. 36368800  |
| O | 2. 83166300  | 2. 03576300  | 1. 08865600  |
| C | 1. 50115300  | 2. 34335000  | 0. 83353200  |
| O | 0. 62086500  | 1. 51108500  | 0. 87407000  |
| C | 1. 31012800  | 3. 77209800  | 0. 50577700  |
| C | 0. 03247200  | 4. 18711000  | 0. 09420400  |
| C | 2. 34513300  | 4. 71312600  | 0. 62274000  |
| C | -0. 20513300 | 5. 52774100  | -0. 19228400 |
| H | -0. 75794200 | 3. 45036600  | -0. 00337400 |
| C | 2. 09985700  | 6. 05463600  | 0. 33500200  |
| H | 3. 33040900  | 4. 39112600  | 0. 93974600  |
| C | 0. 82747800  | 6. 46358400  | -0. 07158900 |
| H | -1. 19627400 | 5. 84029700  | -0. 50778800 |
| H | 2. 90219200  | 6. 78106300  | 0. 42762400  |
| H | 0. 64031600  | 7. 51053000  | -0. 29506700 |

### Int3\_b3

|   |              |              |              |
|---|--------------|--------------|--------------|
| C | 3. 40627800  | -1. 34123500 | 1. 09306800  |
| C | 2. 60556200  | -2. 56997700 | 0. 62368000  |
| H | 4. 18397500  | -1. 10063200 | 0. 35848900  |
| H | 3. 91312500  | -1. 57020200 | 2. 03846600  |
| H | 1. 98199800  | -2. 93737700 | 1. 44727000  |
| H | 3. 30021000  | -3. 37739300 | 0. 35930600  |
| P | 1. 39891100  | -2. 23669400 | -0. 77558200 |
| P | 2. 39225500  | 0. 22490300  | 1. 25656500  |
| C | 0. 52822200  | 1. 34352000  | -2. 34278500 |
| C | -0. 39309000 | 2. 45745500  | -2. 13142300 |
| H | 1. 52687100  | 1. 73648400  | -2. 57836700 |
| C | -2. 01434600 | 1. 98807600  | 1. 22157000  |
| C | -1. 72156100 | 2. 66121100  | -2. 40442200 |

|    |             |             |             |
|----|-------------|-------------|-------------|
| Cu | 0.98643500  | 0.31985800  | -0.64226600 |
| O  | -1.05147400 | 1.25679700  | 1.26425400  |
| C  | 0.55124500  | -3.94573400 | -0.88207400 |
| H  | 1.16356800  | -4.62239000 | -0.27122300 |
| C  | 2.38207100  | -2.52370300 | -2.39616400 |
| H  | 1.82249600  | -1.91736100 | -3.11976300 |
| C  | 1.66153100  | 0.25601000  | 3.02051700  |
| H  | 0.76105000  | 0.86414600  | 2.88560200  |
| C  | 3.74843500  | 1.49068700  | 1.67621300  |
| H  | 4.63158300  | 0.89878200  | 1.95158200  |
| H  | 0.09478700  | 3.32688500  | -1.68061700 |
| H  | 0.22354200  | 0.63715800  | -3.12067400 |
| C  | 2.16385200  | -4.00560800 | -2.76276200 |
| C  | 0.73115100  | -4.36661500 | -2.36046000 |
| H  | 2.35171000  | -4.17528200 | -3.83026900 |
| H  | 2.85837100  | -4.64973300 | -2.20938800 |
| H  | 0.52135100  | -5.43603000 | -2.48329500 |
| H  | 0.01352500  | -3.82578500 | -2.99112300 |
| C  | 3.23508300  | 2.17243200  | 2.96819500  |
| C  | 2.66340000  | 1.06996900  | 3.86635900  |
| H  | 2.17224100  | 1.47625000  | 4.75906100  |
| H  | 3.48614500  | 0.43451200  | 4.21672700  |
| H  | 4.04417100  | 2.72982500  | 3.45527200  |
| H  | 2.45126200  | 2.89971800  | 2.71829300  |
| C  | -0.87274300 | -4.01392400 | -0.37765500 |
| C  | -1.23771500 | -4.98072600 | 0.56903800  |
| C  | -1.86849500 | -3.15461600 | -0.86684000 |
| C  | -2.55864400 | -5.09428800 | 1.00922000  |
| H  | -0.47958600 | -5.65384200 | 0.96386900  |
| C  | -3.18860000 | -3.26478200 | -0.43264400 |
| H  | -1.60602700 | -2.38126600 | -1.58329400 |
| C  | -3.53894200 | -4.23748900 | 0.50783800  |
| H  | -2.81868200 | -5.85364700 | 1.74259100  |
| H  | -3.94005200 | -2.58511700 | -0.82343500 |
| H  | -4.56731000 | -4.31811100 | 0.84887200  |
| C  | 3.80471900  | -2.00771900 | -2.37889200 |
| C  | 4.90444000  | -2.81307900 | -2.04397600 |
| C  | 4.04621900  | -0.65713800 | -2.68592700 |
| C  | 6.19811500  | -2.28562900 | -2.01122500 |
| H  | 4.76226600  | -3.86510600 | -1.81558600 |
| C  | 5.33529100  | -0.12634200 | -2.64677000 |
| H  | 3.20905100  | -0.01594200 | -2.94951500 |
| C  | 6.41937700  | -0.94033100 | -2.30813300 |
| H  | 7.03380100  | -2.93250400 | -1.75584100 |

|   |             |             |             |
|---|-------------|-------------|-------------|
| H | 5.48989300  | 0.92377500  | -2.87792600 |
| H | 7.42602000  | -0.53157400 | -2.28280700 |
| C | 1.22491600  | -1.08982500 | 3.55885400  |
| C | 2.09316000  | -1.94910600 | 4.25137500  |
| C | -0.09719100 | -1.51433500 | 3.34169300  |
| C | 1.65844500  | -3.19848500 | 4.70036500  |
| H | 3.11680300  | -1.64660000 | 4.45422700  |
| C | -0.52953300 | -2.76502700 | 3.78357500  |
| H | -0.79535100 | -0.85782200 | 2.82996000  |
| C | 0.34719800  | -3.61447000 | 4.46282900  |
| H | 2.34742100  | -3.84466200 | 5.23886400  |
| H | -1.55477100 | -3.06904600 | 3.59338700  |
| H | 0.01017300  | -4.58712400 | 4.81187500  |
| C | 4.15277300  | 2.44502200  | 0.57311500  |
| C | 5.50548500  | 2.58374800  | 0.23170600  |
| C | 3.21329400  | 3.23630600  | -0.10663300 |
| C | 5.91281200  | 3.48639900  | -0.75336600 |
| H | 6.24943200  | 1.97870400  | 0.74573000  |
| C | 3.61540200  | 4.13784500  | -1.09209700 |
| H | 2.15558700  | 3.12794800  | 0.11549900  |
| C | 4.96762400  | 4.26775900  | -1.41937600 |
| H | 6.96813400  | 3.57788600  | -0.99770100 |
| H | 2.86914100  | 4.73371800  | -1.61093200 |
| H | 5.27950300  | 4.96996000  | -2.18789000 |
| O | -3.29482800 | 1.51057500  | 0.96496500  |
| C | -3.75382500 | 0.35843500  | 1.58994300  |
| O | -3.24564800 | -0.08873900 | 2.58972300  |
| C | -4.97208500 | -0.16973000 | 0.92995300  |
| C | -5.37393500 | 0.24080800  | -0.34960000 |
| C | -5.72214300 | -1.12816600 | 1.63023500  |
| C | -6.52062000 | -0.31133500 | -0.92132400 |
| H | -4.78539300 | 0.96413700  | -0.90248000 |
| C | -6.87256000 | -1.66410600 | 1.05922500  |
| H | -5.38779000 | -1.43497800 | 2.61581600  |
| C | -7.27143500 | -1.25666000 | -0.21869400 |
| H | -6.81449500 | -0.00630900 | -1.92067600 |
| H | -7.45843400 | -2.39804100 | 1.60577200  |
| H | -8.16660100 | -1.67989600 | -0.66701700 |
| C | -1.98808500 | 3.45704200  | 1.40521400  |
| C | -3.16159500 | 4.22282600  | 1.47615600  |
| C | -0.73960300 | 4.08441300  | 1.54000300  |
| C | -3.08237000 | 5.59959100  | 1.68134400  |
| H | -4.12511800 | 3.73796300  | 1.36989100  |
| C | -0.66482300 | 5.45908200  | 1.73979000  |



|   |             |             |             |
|---|-------------|-------------|-------------|
| H | 0.15723800  | 3.47765200  | 1.48099100  |
| C | -1.83742800 | 6.21885300  | 1.81187600  |
| H | -3.99286100 | 6.18938200  | 1.73685400  |
| H | 0.30394100  | 5.94058700  | 1.83927300  |
| H | -1.77915900 | 7.29252200  | 1.96919000  |
| C | -2.63278200 | 1.66728200  | -2.99589500 |
| C | -3.82194400 | 2.07302200  | -3.64922600 |
| C | -2.40172800 | 0.27193900  | -2.92717200 |
| C | -4.69445500 | 1.15458000  | -4.23268400 |
| H | -4.05805000 | 3.12946300  | -3.72184400 |
| C | -3.27612500 | -0.64446100 | -3.50877900 |
| H | -1.54056700 | -0.09081400 | -2.37958600 |
| C | -4.42655100 | -0.21490900 | -4.17643600 |
| H | -5.58515500 | 1.51556200  | -4.74303800 |
| H | -3.06072100 | -1.70850900 | -3.43549300 |
| H | -5.09972000 | -0.93245500 | -4.63845600 |
| C | -2.28916600 | 4.05043000  | -2.17078000 |
| H | -1.58782600 | 4.66468400  | -1.59729500 |
| H | -2.48759200 | 4.58675900  | -3.11174300 |
| H | -3.23953000 | 4.03183500  | -1.61843800 |

### Int3\_b4

|    |             |             |             |
|----|-------------|-------------|-------------|
| C  | -3.34541200 | -1.92609000 | 0.45044800  |
| C  | -2.15148800 | -2.53491800 | 1.21219400  |
| H  | -3.85962300 | -1.20728300 | 1.09738600  |
| H  | -4.06331300 | -2.72711300 | 0.23004900  |
| H  | -1.75513700 | -3.39493300 | 0.66003000  |
| H  | -2.50183900 | -2.91100600 | 2.18217600  |
| P  | -0.66819500 | -1.42785500 | 1.50006100  |
| P  | -2.92046700 | -0.96063600 | -1.10636300 |
| C  | 2.59042400  | 1.97288600  | 2.24533500  |
| C  | 1.42662100  | 1.39448000  | -2.34854700 |
| Cu | 0.05110200  | -0.43300500 | -0.47482900 |
| C  | 0.46284100  | -2.59455900 | 2.48623600  |
| H  | -0.18904000 | -3.41531300 | 2.81447700  |
| C  | -1.06011100 | -0.34010800 | 3.02252100  |
| H  | -0.45453300 | 0.55220500  | 2.83731900  |
| C  | -2.96643700 | -2.28826600 | -2.49316100 |
| H  | -2.40293100 | -1.81099600 | -3.30640900 |
| C  | -4.66724100 | -0.31610700 | -1.56131700 |
| H  | -5.36551800 | -0.74253600 | -0.82969200 |
| C  | 2.73517300  | 1.72269400  | -2.58334600 |
| C  | -0.44261200 | -1.08534100 | 4.22642100  |

|   |             |             |             |
|---|-------------|-------------|-------------|
| C | 0.83691200  | -1.77173900 | 3.74200700  |
| H | -0.24713900 | -0.38255100 | 5.04462700  |
| H | -1.13013500 | -1.84812700 | 4.61244600  |
| H | 1.27188400  | -2.42574200 | 4.50741000  |
| H | 1.59029400  | -1.01514800 | 3.49456800  |
| C | -4.98245900 | -0.94408300 | -2.94258300 |
| C | -4.43775200 | -2.37471400 | -2.93889000 |
| H | -4.52761400 | -2.85557200 | -3.92151700 |
| H | -5.02355600 | -2.97759200 | -2.23317700 |
| H | -6.05959600 | -0.90775700 | -3.14693500 |
| H | -4.49026100 | -0.36209000 | -3.73277700 |
| C | 1.63234800  | -3.19663500 | 1.74155500  |
| C | 2.69011000  | -2.40666900 | 1.26550600  |
| C | 1.70129200  | -4.58353300 | 1.54824900  |
| C | 3.78636200  | -2.98695600 | 0.62759200  |
| H | 2.66249400  | -1.32859800 | 1.39393100  |
| C | 2.79414300  | -5.16861500 | 0.90499100  |
| H | 0.89151400  | -5.21320900 | 1.91055900  |
| C | 3.84290000  | -4.37138700 | 0.44450400  |
| H | 4.59134900  | -2.35226900 | 0.26963400  |
| H | 2.82732600  | -6.24709600 | 0.77190500  |
| H | 4.69874500  | -4.82359600 | -0.04987500 |
| C | -2.50436300 | 0.09661900  | 3.15683700  |
| C | -3.45717700 | -0.63372100 | 3.88479000  |
| C | -2.92345000 | 1.27818800  | 2.52135500  |
| C | -4.78314800 | -0.20204300 | 3.97013300  |
| H | -3.17084900 | -1.54597200 | 4.39956900  |
| C | -4.24798300 | 1.70839300  | 2.60127800  |
| H | -2.19676300 | 1.85603400  | 1.95766100  |
| C | -5.18570300 | 0.96892300  | 3.32670200  |
| H | -5.50008700 | -0.78278700 | 4.54530700  |
| H | -4.54720000 | 2.62060500  | 2.09289000  |
| H | -6.21687900 | 1.30554100  | 3.39562800  |
| C | -2.25543100 | -3.57867600 | -2.14894400 |
| C | -2.93116300 | -4.73122200 | -1.72051700 |
| C | -0.85214500 | -3.62899800 | -2.23104500 |
| C | -2.22904400 | -5.89019600 | -1.37650000 |
| H | -4.01524100 | -4.73843200 | -1.66097200 |
| C | -0.14917400 | -4.78098800 | -1.88105700 |
| H | -0.30777100 | -2.74752900 | -2.56145900 |
| C | -0.83646400 | -5.91947600 | -1.45028000 |
| H | -2.77714700 | -6.77208300 | -1.05393700 |
| H | 0.93542400  | -4.78737300 | -1.94068600 |
| H | -0.29117600 | -6.82042600 | -1.18215100 |

|   |             |             |             |
|---|-------------|-------------|-------------|
| C | -4.81250100 | 1.19129100  | -1.53369900 |
| C | -5.85221900 | 1.79036700  | -0.80904200 |
| C | -3.94694900 | 2.02607100  | -2.25930600 |
| C | -6.03064800 | 3.17606300  | -0.81099400 |
| H | -6.53147800 | 1.16233500  | -0.23689100 |
| C | -4.12239900 | 3.40995700  | -2.26691400 |
| H | -3.12404800 | 1.59009000  | -2.82059900 |
| C | -5.16661000 | 3.99209700  | -1.54213800 |
| H | -6.84823700 | 3.61527300  | -0.24479700 |
| H | -3.44336500 | 4.03327900  | -2.84349500 |
| H | -5.30698400 | 5.06988300  | -1.55110200 |
| O | 1.90522200  | 1.72208700  | 3.20827100  |
| C | 0.68641600  | 0.13023400  | -2.30358400 |
| H | -0.30016100 | 0.27403700  | -2.76645000 |
| H | 1.18897700  | -0.70844300 | -2.79459600 |
| O | 2.19085500  | 2.87676900  | 1.26176700  |
| C | 3.95003600  | 1.44913400  | 1.98819300  |
| C | 4.52480900  | 1.48277200  | 0.70895200  |
| C | 4.64785100  | 0.86923500  | 3.06090600  |
| C | 5.79055600  | 0.93314500  | 0.50477700  |
| H | 3.96829800  | 1.89806600  | -0.12315000 |
| C | 5.91871700  | 0.34223900  | 2.85529300  |
| H | 4.18189800  | 0.84609000  | 4.04081900  |
| C | 6.48908700  | 0.37303400  | 1.57733400  |
| H | 6.21855800  | 0.93514500  | -0.49296400 |
| H | 6.46407500  | -0.09755400 | 3.68553600  |
| H | 7.47837200  | -0.04770800 | 1.41731600  |
| C | 0.85721900  | 3.01364100  | 0.91822000  |
| O | 0.06015500  | 2.10967300  | 1.03286000  |
| C | 0.55643400  | 4.35111400  | 0.35734700  |
| C | -0.72523800 | 4.56696000  | -0.17459700 |
| C | 1.49739200  | 5.39234700  | 0.35960100  |
| C | -1.06046100 | 5.81315000  | -0.69567100 |
| H | -1.44185100 | 3.75237100  | -0.17790800 |
| C | 1.15418200  | 6.63832400  | -0.16210800 |
| H | 2.48704800  | 5.22045100  | 0.76691100  |
| C | -0.12239900 | 6.85007700  | -0.68924800 |
| H | -2.05315900 | 5.97505100  | -1.10569200 |
| H | 1.88308100  | 7.44364900  | -0.15901600 |
| H | -0.38567200 | 7.82270800  | -1.09631900 |
| H | 0.77942800  | 2.26216300  | -2.19376000 |
| C | 3.82834800  | 0.76286200  | -2.83202300 |
| C | 5.00735000  | 1.16946700  | -3.50113500 |
| C | 3.78698900  | -0.58180200 | -2.39409600 |

|   |            |             |             |
|---|------------|-------------|-------------|
| C | 6.05665000 | 0.28530200  | -3.75077700 |
| H | 5.10013800 | 2.19332700  | -3.84800300 |
| C | 4.83507600 | -1.46533100 | -2.64858500 |
| H | 2.94011500 | -0.92686400 | -1.81447400 |
| C | 5.97766200 | -1.04508400 | -3.33395200 |
| H | 6.93835100 | 0.63947700  | -4.28068400 |
| H | 4.75708400 | -2.49207000 | -2.29828100 |
| H | 6.79106300 | -1.73787400 | -3.53417300 |
| C | 3.08982100 | 3.19795600  | -2.68302400 |
| H | 3.96947600 | 3.46438500  | -2.07811600 |
| H | 3.32190200 | 3.50546300  | -3.71402100 |
| H | 2.25626900 | 3.82170100  | -2.34585400 |

**TS3\_a1**

|    |             |             |             |
|----|-------------|-------------|-------------|
| C  | 3.21670700  | 1.40709700  | 0.81365200  |
| C  | 3.76416500  | 0.05029700  | 0.33488800  |
| H  | 3.37970700  | 2.16532500  | 0.03777200  |
| H  | 3.76680200  | 1.73193200  | 1.70536900  |
| H  | 3.75410800  | -0.66880400 | 1.16235900  |
| H  | 4.80760700  | 0.16647700  | 0.01919500  |
| P  | 2.74149200  | -0.75209300 | -1.00985800 |
| P  | 1.36948600  | 1.43220200  | 1.14502900  |
| C  | -0.38657300 | 0.93685700  | -2.44496600 |
| C  | -1.72536200 | 0.81400400  | -2.12823600 |
| H  | 0.08560100  | 1.90844700  | -2.31647800 |
| C  | -2.15939900 | -1.29843700 | -0.35547200 |
| C  | -2.58117400 | -0.31204700 | -2.35037800 |
| Cu | 0.46678300  | 0.06288800  | -0.56901100 |
| O  | -0.90933800 | -1.42261100 | -0.34457900 |
| C  | 3.56023200  | -2.45600900 | -1.12325600 |
| H  | 4.57689100  | -2.32179600 | -0.72645400 |
| C  | 3.44581300  | -0.19621800 | -2.70839400 |
| C  | 1.16088600  | 0.94789800  | 2.97762400  |
| H  | 0.12146700  | 0.60288800  | 3.02114900  |
| C  | 1.11395300  | 3.29193000  | 1.49728000  |
| C  | -2.00662300 | -1.39521300 | -3.24443900 |
| H  | -2.57688000 | -2.32523500 | -3.20018000 |
| H  | -1.96787900 | -1.07664600 | -4.29684300 |
| H  | -0.98725700 | -1.63781800 | -2.92824500 |
| C  | -4.04817800 | -0.06920900 | -2.41637100 |
| C  | -4.91771500 | -0.99864500 | -3.02869200 |
| C  | -4.66217200 | 1.09060400  | -1.88565500 |
| C  | -6.29619500 | -0.79234800 | -3.09667400 |

|   |             |             |             |
|---|-------------|-------------|-------------|
| H | -4.51620900 | -1.90347900 | -3.46894800 |
| C | -6.03796300 | 1.29589900  | -1.94865300 |
| H | -4.05599000 | 1.86304700  | -1.42586100 |
| C | -6.87385200 | 0.35450800  | -2.55525000 |
| H | -6.91935900 | -1.54008700 | -3.58183600 |
| H | -6.45909200 | 2.20769700  | -1.53026400 |
| H | -7.94675200 | 0.51780700  | -2.61019400 |
| C | -3.05204700 | -2.48662000 | -0.43205500 |
| C | -4.41176700 | -2.43428700 | -0.08588300 |
| C | -2.51150800 | -3.71071900 | -0.86454700 |
| C | -5.20242100 | -3.58178800 | -0.15280800 |
| H | -4.84837700 | -1.49657500 | 0.23631700  |
| C | -3.30693200 | -4.85172200 | -0.93887700 |
| H | -1.46238100 | -3.75342000 | -1.13351100 |
| C | -4.65655400 | -4.79365400 | -0.57867600 |
| H | -6.25153000 | -3.52387200 | 0.12500200  |
| H | -2.87109000 | -5.79047300 | -1.27176000 |
| H | -5.27591500 | -5.68532000 | -0.63063100 |
| H | -2.14266300 | 1.65619000  | -1.58351900 |
| H | 0.08513100  | 0.26498800  | -3.15791800 |
| C | -2.50845800 | -0.24494900 | 1.78938200  |
| O | -2.74405400 | -0.23686800 | 0.45536600  |
| O | -1.79933000 | -1.04438100 | 2.37033200  |
| C | -3.22756200 | 0.86324900  | 2.49637300  |
| C | -4.14061200 | 1.70792100  | 1.84857900  |
| C | -2.98650700 | 1.02601900  | 3.86902300  |
| C | -4.79119500 | 2.71210600  | 2.56688700  |
| H | -4.34951200 | 1.56057200  | 0.79570000  |
| C | -3.63401700 | 2.03362800  | 4.58097700  |
| H | -2.29863900 | 0.34456600  | 4.35895000  |
| C | -4.53614100 | 2.88031200  | 3.92984500  |
| H | -5.50240400 | 3.36063100  | 2.06249100  |
| H | -3.44236100 | 2.15501800  | 5.64368300  |
| H | -5.04407600 | 3.66425600  | 4.48545700  |
| C | 1.25737900  | 2.27364700  | 3.75733500  |
| H | 0.82743000  | 2.16715200  | 4.76090900  |
| H | 2.30418100  | 2.57602600  | 3.88810200  |
| C | 0.52877000  | 3.33820100  | 2.92934900  |
| H | -0.54504500 | 3.11688700  | 2.91045900  |
| H | 0.64083500  | 4.34314900  | 3.35370300  |
| H | 2.12646800  | 3.71360100  | 1.54225800  |
| C | 2.03673100  | -0.20592000 | 3.41703800  |
| C | 1.61200400  | -1.51889500 | 3.14475200  |
| C | 3.27156900  | -0.02428300 | 4.05791300  |

|   |              |              |              |
|---|--------------|--------------|--------------|
| C | 2. 40895800  | -2. 61208100 | 3. 48451900  |
| H | 0. 64946300  | -1. 67722200 | 2. 66431400  |
| C | 4. 06465500  | -1. 12053300 | 4. 40808200  |
| H | 3. 62180600  | 0. 97498100  | 4. 29991400  |
| C | 3. 64002700  | -2. 41740100 | 4. 11704500  |
| H | 2. 06745200  | -3. 61588700 | 3. 24910500  |
| H | 5. 01455500  | -0. 95641400 | 4. 91106900  |
| H | 4. 25879200  | -3. 26971100 | 4. 38509900  |
| C | 3. 70330300  | -2. 67632200 | -2. 64747800 |
| H | 4. 33703100  | -3. 54678600 | -2. 85453600 |
| H | 2. 71889900  | -2. 88363400 | -3. 08854800 |
| C | 4. 29546000  | -1. 38363800 | -3. 22203700 |
| H | 2. 54489800  | -0. 14004400 | -3. 33026900 |
| H | 5. 33260500  | -1. 29054700 | -2. 87837200 |
| H | 4. 32339100  | -1. 38915200 | -4. 31834200 |
| C | 2. 91764900  | -3. 60214900 | -0. 36666700 |
| C | 3. 74681100  | -4. 59413700 | 0. 18048600  |
| C | 1. 52982500  | -3. 73474100 | -0. 21594500 |
| C | 3. 21028200  | -5. 69448200 | 0. 84950700  |
| H | 4. 82675900  | -4. 50185800 | 0. 08077900  |
| C | 0. 99127800  | -4. 83215200 | 0. 46081100  |
| H | 0. 86008500  | -2. 96732700 | -0. 59152900 |
| C | 1. 82629700  | -5. 81743500 | 0. 99166800  |
| H | 3. 87275800  | -6. 45051900 | 1. 26357400  |
| H | -0. 08616700 | -4. 90450300 | 0. 58066800  |
| H | 1. 40306500  | -6. 66957300 | 1. 51720100  |
| C | 4. 09338700  | 1. 17124000  | -2. 72755400 |
| C | 3. 32893000  | 2. 29238700  | -3. 09179000 |
| C | 5. 43520200  | 1. 38183000  | -2. 36884000 |
| C | 3. 87658600  | 3. 57577800  | -3. 08693700 |
| H | 2. 29146700  | 2. 15417400  | -3. 38531200 |
| C | 5. 98779800  | 2. 66409900  | -2. 36730900 |
| H | 6. 06489600  | 0. 54017100  | -2. 09460100 |
| C | 5. 21089000  | 3. 76811400  | -2. 72244200 |
| H | 3. 25916700  | 4. 42261300  | -3. 37446000 |
| H | 7. 03036400  | 2. 79800700  | -2. 09030900 |
| H | 5. 64294600  | 4. 76516400  | -2. 72315600 |
| C | 0. 34152500  | 4. 05487800  | 0. 44417000  |
| C | -1. 03985800 | 3. 87955500  | 0. 26355100  |
| C | 1. 00480300  | 4. 97597600  | -0. 37967500 |
| C | -1. 73231100 | 4. 60840100  | -0. 70371900 |
| H | -1. 58260300 | 3. 16852100  | 0. 88024800  |
| C | 0. 31514800  | 5. 70218600  | -1. 35321000 |
| H | 2. 07456800  | 5. 12941000  | -0. 25416800 |

|   |             |            |             |
|---|-------------|------------|-------------|
| C | -1.05840700 | 5.52205900 | -1.51816300 |
| H | -2.80308800 | 4.46279200 | -0.82084500 |
| H | 0.85137200  | 6.41393900 | -1.97587300 |
| H | -1.60002500 | 6.08788800 | -2.27118500 |

**TS3\_a2**

|    |             |             |             |
|----|-------------|-------------|-------------|
| C  | -3.84743700 | 0.02617200  | 0.95792100  |
| C  | -3.34151100 | -1.40266200 | 1.23980700  |
| H  | -4.94025600 | 0.01704000  | 0.85140200  |
| H  | -3.61471300 | 0.67225700  | 1.81232700  |
| H  | -3.67308700 | -1.70767000 | 2.24034400  |
| H  | -3.78932400 | -2.10267900 | 0.52569900  |
| P  | -1.48916100 | -1.61672600 | 1.05315400  |
| P  | -3.07386400 | 0.88729400  | -0.51835200 |
| C  | -0.06193100 | 0.40637900  | -2.74694000 |
| C  | 1.15976600  | 1.02314900  | -2.57396500 |
| H  | -0.88658600 | 0.98911100  | -3.15107400 |
| C  | 2.18696000  | 0.64803800  | -0.01126200 |
| C  | 2.39233900  | 0.40443700  | -2.17700800 |
| Cu | -0.79737100 | 0.17762500  | -0.61472700 |
| O  | 1.04286100  | 0.19863500  | 0.26625900  |
| C  | -0.73769700 | -1.16888600 | 2.74698800  |
| C  | -1.31393900 | -3.49396900 | 1.35986100  |
| H  | -2.30601900 | -3.84017800 | 1.67886000  |
| C  | -3.94562500 | 2.58945900  | -0.40550900 |
| H  | -4.60510100 | 2.50688300  | 0.46736800  |
| C  | -4.13621900 | 0.33846400  | -2.00636200 |
| C  | 2.37565800  | -1.11413600 | -2.23205900 |
| H  | 3.25772900  | -1.55611000 | -1.76702100 |
| H  | 2.31546200  | -1.47719700 | -3.26895500 |
| H  | 1.50458900  | -1.49851500 | -1.69433500 |
| C  | 3.65648100  | 1.07948300  | -2.59982800 |
| C  | 4.80554500  | 0.33320600  | -2.93838900 |
| C  | 3.77183700  | 2.48398700  | -2.69787100 |
| C  | 5.99116400  | 0.94724200  | -3.34579000 |
| H  | 4.77286200  | -0.75002800 | -2.90840700 |
| C  | 4.95250000  | 3.09755700  | -3.10970600 |
| H  | 2.93228500  | 3.11694000  | -2.43108000 |
| C  | 6.07618400  | 2.33594200  | -3.43770400 |
| H  | 6.84865800  | 0.32959600  | -3.60358500 |
| H  | 4.99403500  | 4.18272400  | -3.16677700 |
| H  | 6.99685300  | 2.81583800  | -3.75890200 |
| H  | 1.16635900  | 2.10612600  | -2.68537600 |

|   |             |             |             |
|---|-------------|-------------|-------------|
| H | -0.12935100 | -0.67007100 | -2.89374900 |
| C | -0.36157200 | -3.59851200 | 2.57814000  |
| C | -0.73346700 | -2.48061100 | 3.55599100  |
| H | 0.30045500  | -0.93401900 | 2.48728800  |
| C | -1.33171000 | 0.05559200  | 3.40733900  |
| C | -2.41616100 | -0.00428600 | 4.29717000  |
| C | -0.78799200 | 1.31786600  | 3.11092100  |
| C | -2.94998700 | 1.15856500  | 4.85944900  |
| H | -2.84781000 | -0.96378800 | 4.56768300  |
| C | -1.32379700 | 2.47994600  | 3.66616800  |
| H | 0.06632300  | 1.37620300  | 2.44275100  |
| C | -2.41066100 | 2.40632400  | 4.54203500  |
| H | -3.78536100 | 1.08556600  | 5.55176800  |
| H | -0.88492000 | 3.44234400  | 3.41706600  |
| H | -2.82328400 | 3.30982100  | 4.98382300  |
| C | -0.88393400 | -4.31791000 | 0.16687700  |
| C | -1.65268100 | -5.41184600 | -0.25272400 |
| C | 0.30617500  | -4.03805300 | -0.52340600 |
| C | -1.24888300 | -6.20653100 | -1.32861500 |
| H | -2.57730300 | -5.64546100 | 0.27079000  |
| C | 0.71188300  | -4.82748400 | -1.59901200 |
| H | 0.91691600  | -3.19211300 | -0.21913700 |
| C | -0.06466400 | -5.91592700 | -2.00723400 |
| H | -1.85893300 | -7.05373300 | -1.63237500 |
| H | 1.63637900  | -4.59097200 | -2.11904500 |
| H | 0.25370900  | -6.53239300 | -2.84374200 |
| C | -4.83827600 | 2.67649100  | -1.67123500 |
| C | -5.35921200 | 1.27423600  | -1.98863600 |
| H | -3.51991100 | 0.62075000  | -2.87103200 |
| C | -4.40144200 | -1.14925800 | -2.10368300 |
| C | -5.59866200 | -1.73558500 | -1.66647800 |
| C | -3.41564900 | -1.98920000 | -2.64879600 |
| C | -5.79793700 | -3.11572400 | -1.76134700 |
| H | -6.39282300 | -1.11918700 | -1.25658300 |
| C | -3.60726900 | -3.36705500 | -2.73618200 |
| H | -2.48461900 | -1.55438800 | -3.00366200 |
| C | -4.80277200 | -3.93719700 | -2.29095600 |
| H | -6.73709100 | -3.54539300 | -1.42203800 |
| H | -2.82135800 | -3.99502700 | -3.14508100 |
| H | -4.95735200 | -5.01029600 | -2.36202300 |
| C | -3.06412200 | 3.80363300  | -0.21137200 |
| C | -3.20871500 | 4.60126100  | 0.93216900  |
| C | -2.13888300 | 4.20556100  | -1.18799200 |
| C | -2.47008400 | 5.77583700  | 1.08991900  |



|   |             |             |             |
|---|-------------|-------------|-------------|
| H | -3.91403300 | 4.30293500  | 1.70431200  |
| C | -1.40228300 | 5.37999700  | -1.03688300 |
| H | -1.99487200 | 3.59887000  | -2.07882600 |
| C | -1.57025100 | 6.17451300  | 0.10089600  |
| H | -2.60593700 | 6.38226000  | 1.98155100  |
| H | -0.69557500 | 5.67490900  | -1.80777600 |
| H | -1.00307000 | 7.09456800  | 0.21374800  |
| C | 2.55297700  | 2.07189200  | 0.26769200  |
| C | 3.87819500  | 2.47743300  | 0.48997900  |
| C | 1.53324900  | 3.03523800  | 0.33777500  |
| C | 4.17281300  | 3.80732200  | 0.79187400  |
| H | 4.67774600  | 1.74898300  | 0.43023300  |
| C | 1.83156700  | 4.36492300  | 0.63150300  |
| H | 0.50420100  | 2.73351300  | 0.17256800  |
| C | 3.15312000  | 4.75660600  | 0.86384900  |
| H | 5.20492000  | 4.09946800  | 0.96751200  |
| H | 1.02606700  | 5.09103700  | 0.68977100  |
| H | 3.38392400  | 5.79222800  | 1.10068400  |
| O | 3.31626600  | -0.22812400 | 0.27623200  |
| C | 3.41813300  | -0.85057900 | 1.47360200  |
| O | 2.62891000  | -0.75241900 | 2.39360700  |
| C | 4.65601900  | -1.69110400 | 1.55067700  |
| C | 5.62044000  | -1.71250500 | 0.53262000  |
| C | 4.84780300  | -2.46417100 | 2.70457900  |
| C | 6.75990900  | -2.50543600 | 0.67068100  |
| H | 5.47928400  | -1.10234600 | -0.35253200 |
| C | 5.98472800  | -3.25781700 | 2.83643300  |
| H | 4.09519600  | -2.42439300 | 3.48513700  |
| C | 6.94283200  | -3.27999200 | 1.81873400  |
| H | 7.50716100  | -2.51669500 | -0.11823600 |
| H | 6.12669500  | -3.85699200 | 3.73187300  |
| H | 7.83138000  | -3.89754700 | 1.92206800  |
| H | -0.43176000 | -4.59480600 | 3.03149300  |
| H | 0.67641900  | -3.46494200 | 2.24942300  |
| H | -1.72189400 | -2.68907200 | 3.98676600  |
| H | -0.02493600 | -2.41299600 | 4.39039400  |
| H | -5.64958400 | 3.39677000  | -1.51295700 |
| H | -4.24571400 | 3.04899300  | -2.51586900 |
| H | -6.07047600 | 0.96894100  | -1.21115100 |
| H | -5.89484100 | 1.23809600  | -2.94534400 |

**TS3\_a3**

|   |            |             |            |
|---|------------|-------------|------------|
| C | 3.87309800 | -0.33011700 | 0.59266200 |
|---|------------|-------------|------------|

|    |             |             |             |
|----|-------------|-------------|-------------|
| C  | 3.49573900  | -1.63710500 | -0.12690800 |
| H  | 4.33444000  | 0.36328400  | -0.12120600 |
| H  | 4.61863700  | -0.53818300 | 1.37025800  |
| H  | 3.19427600  | -2.39454800 | 0.60597500  |
| H  | 4.37259700  | -2.02757700 | -0.65652000 |
| P  | 2.02982600  | -1.47931400 | -1.27863200 |
| P  | 2.42553100  | 0.61269000  | 1.32616100  |
| C  | 0.27027600  | 1.93224900  | -1.70961100 |
| C  | -0.95672500 | 2.35946100  | -1.24515100 |
| H  | 1.14766600  | 2.53765000  | -1.49607600 |
| C  | -2.30486900 | 0.40635700  | 0.23664500  |
| C  | -2.23890000 | 1.77414200  | -1.51302800 |
| Cu | 0.66567100  | 0.28772000  | -0.24820600 |
| O  | -1.26059600 | -0.28999600 | 0.11216200  |
| C  | 1.74864300  | -3.28587100 | -1.76466900 |
| H  | 2.72061600  | -3.78242700 | -1.62974000 |
| C  | 2.68526300  | -1.01468500 | -3.02320500 |
| C  | 2.25704900  | -0.02261100 | 3.11654400  |
| H  | 1.23070300  | 0.25824900  | 3.38637200  |
| C  | 3.30836500  | 2.21759700  | 1.86565500  |
| H  | 4.37430600  | 2.02563900  | 1.68818700  |
| C  | -2.23943600 | 0.70309000  | -2.59052200 |
| H  | -3.18393900 | 0.15895600  | -2.63558800 |
| H  | -2.04200900 | 1.12906900  | -3.58581500 |
| H  | -1.46230600 | -0.03715100 | -2.37824300 |
| C  | -3.42637500 | 2.67268200  | -1.44574000 |
| C  | -4.55189400 | 2.45942600  | -2.27189200 |
| C  | -3.49505300 | 3.78428100  | -0.57492500 |
| C  | -5.67006500 | 3.29282300  | -2.22801300 |
| H  | -4.54899000 | 1.64147500  | -2.98319600 |
| C  | -4.60856400 | 4.62030900  | -0.53460600 |
| H  | -2.67132100 | 3.99891900  | 0.09699600  |
| C  | -5.71023400 | 4.38328100  | -1.35919300 |
| H  | -6.50992200 | 3.09093200  | -2.88911800 |
| H  | -4.61459100 | 5.46226400  | 0.15382600  |
| H  | -6.57813500 | 5.03650300  | -1.32701400 |
| H  | -0.92967400 | 3.19584200  | -0.54989700 |
| H  | 0.33702200  | 1.27779300  | -2.57532200 |
| O  | -3.54274900 | -0.21199800 | -0.20177500 |
| C  | -2.53958000 | 1.29837700  | 1.41220500  |
| C  | -3.81832300 | 1.76408000  | 1.75755200  |
| C  | -1.45177500 | 1.67291400  | 2.21808400  |
| C  | -4.00067300 | 2.57540400  | 2.87840300  |
| H  | -4.67133100 | 1.48793000  | 1.14980500  |

|   |             |             |             |
|---|-------------|-------------|-------------|
| C | -1.63458500 | 2.48958900  | 3.33219400  |
| H | -0.46582500 | 1.29886300  | 1.96653900  |
| C | -2.91273600 | 2.94565900  | 3.66910500  |
| H | -5.00003000 | 2.92065200  | 3.12969900  |
| H | -0.78187100 | 2.75807200  | 3.95239400  |
| H | -3.05725600 | 3.57669100  | 4.54212600  |
| C | -3.97964900 | -1.31549400 | 0.45560600  |
| C | -5.28441700 | -1.80793400 | -0.08602300 |
| C | -5.81371000 | -2.98591900 | 0.46035300  |
| C | -5.99091600 | -1.12959600 | -1.08938000 |
| C | -7.02814200 | -3.48865100 | 0.00006100  |
| H | -5.25957900 | -3.48715300 | 1.24705400  |
| C | -7.20902800 | -1.63432800 | -1.54473100 |
| H | -5.59219800 | -0.20696600 | -1.49524700 |
| C | -7.72709000 | -2.81405500 | -1.00520100 |
| H | -7.43218300 | -4.40349100 | 0.42522100  |
| H | -7.75557100 | -1.10447900 | -2.32023600 |
| H | -8.67583500 | -3.20515700 | -1.36371000 |
| O | -3.39621800 | -1.84534900 | 1.38077200  |
| C | 1.50548500  | -3.19982800 | -3.28937900 |
| H | 1.50449600  | -4.20076700 | -3.73682500 |
| H | 0.51911600  | -2.75892800 | -3.48705700 |
| C | 2.62299400  | -2.31705700 | -3.85930700 |
| H | 3.57141600  | -2.86254600 | -3.78974900 |
| H | 2.46929900  | -2.08291600 | -4.91951600 |
| H | 1.90609600  | -0.34286000 | -3.40097500 |
| C | 3.09888500  | 2.28343600  | 3.39865900  |
| C | 3.21434100  | 0.85534700  | 3.94422600  |
| H | 2.97399700  | 0.80019100  | 5.01308500  |
| H | 4.25085100  | 0.51385900  | 3.83019000  |
| H | 3.82962200  | 2.96223600  | 3.85401900  |
| H | 2.10491100  | 2.68826000  | 3.62664000  |
| C | 0.71794100  | -4.07892200 | -0.98583300 |
| C | 0.96347700  | -5.44159900 | -0.75156200 |
| C | -0.48104800 | -3.52456200 | -0.51469600 |
| C | 0.03595700  | -6.23594200 | -0.07772100 |
| H | 1.89364700  | -5.88472300 | -1.10310800 |
| C | -1.40652900 | -4.31607700 | 0.17174700  |
| H | -0.69488000 | -2.46767500 | -0.64621200 |
| C | -1.15460100 | -5.67268900 | 0.38749100  |
| H | 0.24689200  | -7.28944900 | 0.08911800  |
| H | -2.31110100 | -3.85390700 | 0.55442900  |
| H | -1.87727500 | -6.28495600 | 0.92110200  |
| C | 3.98849800  | -0.24567900 | -3.04540000 |

|   |            |             |             |
|---|------------|-------------|-------------|
| C | 3.96064500 | 1.15855300  | -3.09002000 |
| C | 5.24367700 | -0.87452600 | -2.99749500 |
| C | 5.13785600 | 1.90759200  | -3.07827300 |
| H | 3.00204600 | 1.66922900  | -3.13791900 |
| C | 6.42379300 | -0.12822400 | -2.99019200 |
| H | 5.30949100 | -1.95863900 | -2.97451100 |
| C | 6.37749300 | 1.26646500  | -3.02760700 |
| H | 5.08272500 | 2.99233900  | -3.11562100 |
| H | 7.38177500 | -0.64093000 | -2.95889500 |
| H | 7.29670000 | 1.84595900  | -3.02540300 |
| C | 2.92867000 | 3.46790400  | 1.10292600  |
| C | 3.87017600 | 4.09211500  | 0.27186400  |
| C | 1.65243900 | 4.04432000  | 1.20800900  |
| C | 3.55330800 | 5.25617700  | -0.43219500 |
| H | 4.86535700 | 3.66258600  | 0.17792000  |
| C | 1.33459100 | 5.20953100  | 0.50996400  |
| H | 0.89196300 | 3.57928800  | 1.82930400  |
| C | 2.28309900 | 5.82072300  | -0.31424300 |
| H | 4.30213900 | 5.72329200  | -1.06679400 |
| H | 0.34147700 | 5.63977200  | 0.60864500  |
| H | 2.03230200 | 6.72727000  | -0.85803000 |
| C | 2.36635300 | -1.52752900 | 3.24321100  |
| C | 3.53123100 | -2.17012300 | 3.68695600  |
| C | 1.26809600 | -2.32236300 | 2.86888500  |
| C | 3.59958600 | -3.56498200 | 3.74907500  |
| H | 4.39308000 | -1.58829700 | 3.99999100  |
| C | 1.33869800 | -3.71391300 | 2.92095700  |
| H | 0.35355900 | -1.84711200 | 2.52040200  |
| C | 2.50733500 | -4.34135700 | 3.36207100  |
| H | 4.51056100 | -4.04116100 | 4.10313600  |
| H | 0.48244700 | -4.30401600 | 2.60865800  |
| H | 2.56243200 | -5.42570700 | 3.40585300  |

#### TS3\_a4

|   |            |             |             |
|---|------------|-------------|-------------|
| C | 2.96168000 | -2.30743000 | 0.35294900  |
| C | 3.62539300 | -1.06425200 | 0.97494200  |
| H | 3.73731500 | -3.00773200 | 0.01772600  |
| H | 2.36556000 | -2.82771800 | 1.11233600  |
| H | 4.11796200 | -1.34958200 | 1.91254100  |
| H | 4.40424400 | -0.68641000 | 0.30276800  |
| P | 2.47165600 | 0.38701800  | 1.24686900  |
| P | 1.75551600 | -1.96755100 | -1.03944200 |
| C | 0.33911700 | 1.36045200  | -2.27442700 |

|    |             |             |             |
|----|-------------|-------------|-------------|
| C  | -1.02832000 | 1.54035800  | -2.20300900 |
| H  | 0.72464100  | 0.65520000  | -3.00774000 |
| C  | -1.97457300 | 1.30455000  | 0.43130800  |
| C  | -1.74552100 | 2.52436500  | -1.45048800 |
| Cu | 0.65963200  | 0.07444000  | -0.47506500 |
| O  | -0.82109600 | 0.86765000  | 0.67678900  |
| C  | 1.73293800  | 0.16171800  | 2.99284800  |
| C  | 3.71802800  | 1.71119300  | 1.83298500  |
| H  | 4.66380100  | 1.17768200  | 1.99570600  |
| C  | 1.19355200  | -3.74661900 | -1.44269500 |
| H  | 1.91672500  | -4.39118300 | -0.92558300 |
| C  | 2.79970500  | -1.83463200 | -2.64279600 |
| C  | -0.89013600 | 3.64456800  | -0.88662800 |
| H  | -1.42146900 | 4.25387400  | -0.15338400 |
| H  | -0.52411800 | 4.31307200  | -1.68034600 |
| H  | -0.01894300 | 3.22564900  | -0.37500600 |
| C  | -3.11152900 | 2.88603600  | -1.92507000 |
| C  | -3.67959200 | 4.14359800  | -1.62683900 |
| C  | -3.90985800 | 2.01733100  | -2.70581600 |
| C  | -4.95411900 | 4.50509900  | -2.06693200 |
| H  | -3.11740800 | 4.86485500  | -1.04637600 |
| C  | -5.18136800 | 2.37596900  | -3.14528300 |
| H  | -3.53320600 | 1.03953600  | -2.98499200 |
| C  | -5.72076600 | 3.62602600  | -2.82899700 |
| H  | -5.34348900 | 5.48775900  | -1.81079400 |
| H  | -5.75296400 | 1.67371700  | -3.74840700 |
| H  | -6.71142500 | 3.90704600  | -3.17596500 |
| C  | -2.60822100 | 2.31477500  | 1.32905000  |
| C  | -3.97723500 | 2.62223300  | 1.27442400  |
| C  | -1.80502600 | 2.97942400  | 2.27085100  |
| C  | -4.52551400 | 3.56215700  | 2.14751500  |
| H  | -4.61255800 | 2.12299000  | 0.55261000  |
| C  | -2.35421400 | 3.92169200  | 3.13697600  |
| H  | -0.74988900 | 2.73314600  | 2.31862000  |
| C  | -3.71936200 | 4.21693000  | 3.08016400  |
| H  | -5.58832200 | 3.78335900  | 2.09480900  |
| H  | -1.71879400 | 4.42013100  | 3.86499200  |
| H  | -4.15034100 | 4.94804600  | 3.75924200  |
| H  | -1.62059400 | 0.80108000  | -2.73753300 |
| H  | 1.03266700  | 2.13560200  | -1.95679200 |
| C  | -3.41412500 | -0.57265000 | 0.77752200  |
| O  | -2.95299300 | 0.36293400  | -0.09641500 |
| O  | -2.95510200 | -0.76278900 | 1.88625200  |
| C  | -4.58113900 | -1.34040100 | 0.24242400  |

|   |             |             |             |
|---|-------------|-------------|-------------|
| C | -5.18043200 | -1.05048000 | -0.99045300 |
| C | -5.09683300 | -2.37321100 | 1.03861300  |
| C | -6.27514700 | -1.79881000 | -1.42635300 |
| H | -4.79958000 | -0.23253400 | -1.58912800 |
| C | -6.19030400 | -3.11706400 | 0.60152700  |
| H | -4.62544600 | -2.57313600 | 1.99487600  |
| C | -6.77912300 | -2.83392000 | -0.63502200 |
| H | -6.73967600 | -1.56800400 | -2.38134300 |
| H | -6.58748800 | -3.91433400 | 1.22427700  |
| H | -7.63322100 | -3.41315600 | -0.97648600 |
| C | 3.18400800  | 2.15260400  | 3.21825700  |
| C | 2.69368400  | 0.89824200  | 3.94744700  |
| H | 0.80449200  | 0.74117800  | 2.92637200  |
| C | 1.35020300  | -1.26105300 | 3.33942300  |
| C | 2.23028500  | -2.15362100 | 3.97183300  |
| C | 0.06782000  | -1.72054900 | 2.99283300  |
| C | 1.84512500  | -3.46990000 | 4.24025100  |
| H | 3.22209800  | -1.82645300 | 4.27139000  |
| C | -0.31372400 | -3.03637200 | 3.25581900  |
| H | -0.63880100 | -1.04542200 | 2.51753100  |
| C | 0.57345400  | -3.91819000 | 3.87871700  |
| H | 2.54052900  | -4.14174700 | 4.73768700  |
| H | -1.31011500 | -3.36296400 | 2.97286100  |
| H | 0.27368600  | -4.94149600 | 4.09011800  |
| C | 3.98008100  | 2.85196400  | 0.87454100  |
| C | 5.28656100  | 3.13330300  | 0.45248200  |
| C | 2.94365800  | 3.68153600  | 0.41776500  |
| C | 5.55416700  | 4.20854900  | -0.39872600 |
| H | 6.10475000  | 2.50456600  | 0.79700300  |
| C | 3.20509400  | 4.75355300  | -0.43492600 |
| H | 1.92116100  | 3.48631200  | 0.72903700  |
| C | 4.51324400  | 5.02213500  | -0.84750300 |
| H | 6.57715700  | 4.41067200  | -0.70636500 |
| H | 2.38489300  | 5.37881000  | -0.77739900 |
| H | 4.71732600  | 5.85921300  | -1.50971700 |
| C | 1.45139800  | -3.89200100 | -2.96031900 |
| C | 2.80927100  | -3.25215000 | -3.25443600 |
| H | 2.17320400  | -1.20390500 | -3.28595100 |
| C | 4.14156200  | -1.14691700 | -2.50549800 |
| C | 5.31824100  | -1.83998300 | -2.17806000 |
| C | 4.22952300  | 0.24109500  | -2.70242900 |
| C | 6.53563100  | -1.16818900 | -2.04647000 |
| H | 5.29661900  | -2.91548200 | -2.02944200 |
| C | 5.44251200  | 0.91614000  | -2.56692300 |

|   |             |             |             |
|---|-------------|-------------|-------------|
| H | 3.33427800  | 0.79901600  | -2.96519700 |
| C | 6.60318600  | 0.21270800  | -2.23714400 |
| H | 7.43297200  | -1.72928800 | -1.79812800 |
| H | 5.47702100  | 1.99148000  | -2.71415100 |
| H | 7.55107700  | 0.73436400  | -2.13622900 |
| C | -0.19223500 | -4.15597500 | -1.00125700 |
| C | -0.34887700 | -5.19644500 | -0.07534700 |
| C | -1.34580000 | -3.56567200 | -1.54057500 |
| C | -1.61803900 | -5.64427500 | 0.29679600  |
| H | 0.53359600  | -5.66541800 | 0.35443500  |
| C | -2.61459300 | -4.01392400 | -1.17623800 |
| H | -1.25290700 | -2.74636700 | -2.24952800 |
| C | -2.75527800 | -5.05673200 | -0.25654300 |
| H | -1.71438300 | -6.45514100 | 1.01433500  |
| H | -3.49571900 | -3.54537700 | -1.60349400 |
| H | -3.74608600 | -5.39906200 | 0.02768000  |
| H | 3.96443800  | 2.68303900  | 3.77715000  |
| H | 2.35238300  | 2.85669700  | 3.08640300  |
| H | 3.55688400  | 0.26803500  | 4.19604300  |
| H | 2.19248000  | 1.13967300  | 4.89295500  |
| H | 3.59609700  | -3.86499600 | -2.79876000 |
| H | 3.02425100  | -3.20620700 | -4.32900700 |
| H | 1.41835100  | -4.94842100 | -3.25184900 |
| H | 0.66222600  | -3.38070900 | -3.52626300 |

### TS3\_b1

|    |             |             |             |
|----|-------------|-------------|-------------|
| C  | 3.36537900  | 0.45615200  | 0.73712000  |
| C  | 3.24302500  | -1.07083100 | 0.88284700  |
| H  | 3.82752300  | 0.69982800  | -0.22763900 |
| H  | 4.02588700  | 0.84919800  | 1.51994800  |
| H  | 2.93629300  | -1.32334600 | 1.90436400  |
| H  | 4.22111000  | -1.53582300 | 0.71234800  |
| P  | 1.93674700  | -1.84057700 | -0.21359100 |
| P  | 1.73039600  | 1.37821500  | 0.74211600  |
| C  | -0.15196900 | 0.30758600  | -2.64590600 |
| C  | -1.42343800 | 0.82594600  | -2.46963200 |
| H  | 0.65838200  | 1.01764200  | -2.79968500 |
| C  | -2.67506700 | -0.01361700 | -0.14232200 |
| C  | -2.71338800 | 0.20752300  | -2.41508900 |
| Cu | 0.28039300  | -0.06370600 | -0.48405100 |
| O  | -1.60767300 | -0.62224600 | 0.10557500  |
| C  | 1.90423300  | -3.61536500 | 0.44773300  |
| H  | 2.88341700  | -3.77015500 | 0.92361100  |

|   |              |              |              |
|---|--------------|--------------|--------------|
| C | 2. 77381100  | -2. 36778300 | -1. 85820300 |
| C | 1. 34977100  | 1. 78767100  | 2. 56776500  |
| H | 0. 26254400  | 1. 92336400  | 2. 56319800  |
| C | 2. 34428400  | 3. 14441100  | 0. 36275800  |
| C | -3. 86338000 | 1. 17033600  | -2. 67418800 |
| C | -4. 00808200 | -0. 63139200 | 0. 08373800  |
| C | -5. 17292100 | 0. 13283000  | 0. 26706700  |
| C | -4. 10692800 | -2. 03318500 | 0. 12697900  |
| C | -6. 40118200 | -0. 48958100 | 0. 49147100  |
| H | -5. 11428400 | 1. 21510000  | 0. 24502500  |
| C | -5. 33628700 | -2. 64969100 | 0. 34522900  |
| H | -3. 21344000 | -2. 62806400 | -0. 01603700 |
| C | -6. 48947600 | -1. 88197400 | 0. 53029900  |
| H | -7. 29021400 | 0. 11807900  | 0. 63983100  |
| H | -5. 39390000 | -3. 73474600 | 0. 37209600  |
| H | -7. 44727000 | -2. 36527400 | 0. 70445100  |
| H | -1. 44810600 | 1. 89759600  | -2. 26893500 |
| H | -0. 00206800 | -0. 68457600 | -3. 06328000 |
| C | -2. 47055600 | 1. 86204200  | 1. 36884600  |
| O | -2. 69627300 | 1. 42779600  | 0. 10706200  |
| O | -2. 24387100 | 1. 14706000  | 2. 32575200  |
| C | -2. 53436700 | 3. 35633300  | 1. 46794600  |
| C | -2. 81410000 | 4. 17914700  | 0. 36707100  |
| C | -2. 31762800 | 3. 93563800  | 2. 72698600  |
| C | -2. 86410100 | 5. 56457200  | 0. 52504500  |
| H | -2. 99496300 | 3. 72953300  | -0. 60256500 |
| C | -2. 36707000 | 5. 31963300  | 2. 88102900  |
| H | -2. 12036100 | 3. 28156500  | 3. 57005300  |
| C | -2. 63860200 | 6. 13647500  | 1. 77946500  |
| H | -3. 08191000 | 6. 19788900  | -0. 33058200 |
| H | -2. 19925700 | 5. 76199000  | 3. 85922400  |
| H | -2. 67833100 | 7. 21588500  | 1. 89942900  |
| H | -3. 65574400 | 2. 14656100  | -2. 22623400 |
| H | -4. 02667900 | 1. 33690900  | -3. 74968300 |
| H | -4. 80862400 | 0. 80736200  | -2. 25663900 |
| C | -2. 91839000 | -1. 18926700 | -2. 88427800 |
| C | -4. 06497800 | -1. 54275400 | -3. 62855000 |
| C | -2. 01350800 | -2. 23553900 | -2. 59267300 |
| C | -4. 28209200 | -2. 84578400 | -4. 07510000 |
| H | -4. 80160800 | -0. 78637600 | -3. 87500100 |
| C | -2. 23497600 | -3. 54014100 | -3. 03260700 |
| H | -1. 15236500 | -2. 03281800 | -1. 97041800 |
| C | -3. 36617400 | -3. 85755300 | -3. 78613600 |
| H | -5. 17589500 | -3. 06825600 | -4. 65353500 |



|   |             |             |             |
|---|-------------|-------------|-------------|
| H | -1.51724300 | -4.31749600 | -2.77731100 |
| H | -3.53335400 | -4.87336200 | -4.13480500 |
| C | 1.89733900  | -4.46930200 | -0.84204800 |
| H | 2.06974600  | -5.52614500 | -0.60644800 |
| H | 0.91344200  | -4.40469300 | -1.32615300 |
| C | 2.98981000  | -3.89646800 | -1.75318000 |
| H | 3.96768300  | -4.11824900 | -1.30940800 |
| H | 2.98257900  | -4.35332600 | -2.75008300 |
| H | 1.98050100  | -2.19627300 | -2.59482300 |
| C | 0.83752800  | -3.97875000 | 1.46220100  |
| C | 1.15236200  | -4.91342800 | 2.46134000  |
| C | -0.46166300 | -3.45289000 | 1.42641800  |
| C | 0.19764600  | -5.32341800 | 3.39230600  |
| H | 2.15899800  | -5.32484400 | 2.50915400  |
| C | -1.41723800 | -3.85731500 | 2.36199800  |
| H | -0.73140600 | -2.69862900 | 0.69440800  |
| C | -1.09474600 | -4.79559600 | 3.34459400  |
| H | 0.46497800  | -6.04995800 | 4.15561400  |
| H | -2.41318200 | -3.42471300 | 2.32166300  |
| H | -1.84133500 | -5.10805300 | 4.07016600  |
| C | 3.96346200  | -1.52911100 | -2.27322300 |
| C | 5.27056600  | -1.78841700 | -1.82940300 |
| C | 3.76410200  | -0.42107100 | -3.11421300 |
| C | 6.33589400  | -0.96905700 | -2.20863600 |
| H | 5.46914400  | -2.64164000 | -1.18704800 |
| C | 4.82552500  | 0.40205000  | -3.49147800 |
| H | 2.76227700  | -0.20348400 | -3.47547600 |
| C | 6.11890100  | 0.13160500  | -3.03913300 |
| H | 7.33854300  | -1.19591200 | -1.85530000 |
| H | 4.63889200  | 1.25161100  | -4.14289600 |
| H | 6.94920900  | 0.76669000  | -3.33597300 |
| C | 1.99882800  | 3.16353100  | 2.81972000  |
| H | 1.54842500  | 3.64959400  | 3.69378400  |
| H | 3.07064500  | 3.05852000  | 3.02937700  |
| C | 1.81926700  | 3.99472400  | 1.54390100  |
| H | 0.75764700  | 4.23042800  | 1.40240400  |
| H | 2.35529200  | 4.95017600  | 1.59278000  |
| H | 3.43696900  | 3.09212700  | 0.45710400  |
| C | 1.65938600  | 0.66611700  | 3.53575000  |
| C | 2.88129800  | 0.56421000  | 4.21840100  |
| C | 0.69728600  | -0.33995100 | 3.73641200  |
| C | 3.13971600  | -0.51523300 | 5.06734400  |
| H | 3.64082900  | 1.33189200  | 4.10065300  |
| C | 0.95998900  | -1.42348700 | 4.57473200  |

|   |             |             |             |
|---|-------------|-------------|-------------|
| H | -0.26191100 | -0.26788000 | 3.22947200  |
| C | 2.18363400  | -1.51641600 | 5.24328800  |
| H | 4.09091500  | -0.56991100 | 5.59120800  |
| H | 0.20794800  | -2.19721200 | 4.69906000  |
| H | 2.38682700  | -2.35880000 | 5.89920600  |
| C | 2.02451400  | 3.66551400  | -1.02030900 |
| C | 3.05344900  | 3.84466000  | -1.95621100 |
| C | 0.71436800  | 3.99025300  | -1.40636000 |
| C | 2.78777500  | 4.33115700  | -3.23831000 |
| H | 4.07663000  | 3.60362800  | -1.67570200 |
| C | 0.44645000  | 4.47994400  | -2.68472200 |
| H | -0.10528000 | 3.85992600  | -0.70544400 |
| C | 1.48121400  | 4.65149600  | -3.60786500 |
| H | 3.60389300  | 4.46579000  | -3.94373400 |
| H | -0.57510200 | 4.72768700  | -2.96122400 |
| H | 1.26961000  | 5.03234200  | -4.60324600 |

### TS3\_b2

|    |             |             |             |
|----|-------------|-------------|-------------|
| C  | -3.02904000 | -1.76901400 | 1.05840700  |
| C  | -1.84568900 | -2.64316200 | 1.51598600  |
| H  | -3.93873800 | -2.38457700 | 1.02717300  |
| H  | -3.20828400 | -0.97930100 | 1.79672300  |
| H  | -2.05388100 | -2.97595400 | 2.54150800  |
| H  | -1.79339200 | -3.54435700 | 0.89482900  |
| P  | -0.12493400 | -1.88467400 | 1.39535900  |
| P  | -2.89269100 | -0.84860300 | -0.56412400 |
| C  | -0.53996900 | 0.83276700  | -3.08523600 |
| C  | 0.06825100  | 2.05548400  | -2.85793500 |
| H  | -1.56118500 | 0.83589800  | -3.46263300 |
| C  | 1.18899800  | 2.31248700  | -0.31603500 |
| C  | 1.42487000  | 2.38936200  | -2.54496800 |
| Cu | -1.01254900 | 0.37691800  | -0.96033800 |
| O  | 0.48195200  | 1.29696800  | -0.06797700 |
| C  | 0.07874900  | -0.86136300 | 3.01227100  |
| C  | 0.86894800  | -3.35529500 | 2.11884900  |
| H  | 0.13438400  | -4.06232500 | 2.52734900  |
| C  | -4.61195600 | -0.02002400 | -0.61606100 |
| H  | -5.10887900 | -0.36318000 | 0.29950100  |
| C  | -3.34022000 | -2.10499500 | -1.91887400 |
| C  | 1.77760700  | 3.83984100  | -2.85151300 |
| H  | -0.60908700 | 2.91208100  | -2.83061900 |
| H  | 0.04826500  | -0.04827300 | -3.33292800 |
| C  | 1.64531200  | -2.75010800 | 3.31295400  |

|   |             |             |             |
|---|-------------|-------------|-------------|
| C | 0.68041600  | -1.82408800 | 4.05571400  |
| H | 0.85586900  | -0.14003000 | 2.73574400  |
| C | -1.13370400 | -0.06520800 | 3.44324300  |
| C | -2.12164800 | -0.57928700 | 4.29951300  |
| C | -1.29199300 | 1.24823400  | 2.96620600  |
| C | -3.23692100 | 0.18476600  | 4.65388300  |
| H | -2.02422300 | -1.58185600 | 4.70620700  |
| C | -2.40695800 | 2.01046300  | 3.31607500  |
| H | -0.52509100 | 1.66882100  | 2.32284200  |
| C | -3.38802300 | 1.48161400  | 4.15960800  |
| H | -3.98376500 | -0.23443400 | 5.32413100  |
| H | -2.50026200 | 3.02328300  | 2.93310400  |
| H | -4.25151700 | 2.07872400  | 4.44224100  |
| C | 1.74312100  | -4.10583500 | 1.13833800  |
| C | 2.74813400  | -3.45938400 | 0.39999400  |
| C | 1.59730800  | -5.49132500 | 0.98070300  |
| C | 3.58203500  | -4.17846500 | -0.45658500 |
| H | 2.87899700  | -2.38418800 | 0.49318000  |
| C | 2.42606900  | -6.21436900 | 0.11923800  |
| H | 0.82607400  | -6.01135500 | 1.54495200  |
| C | 3.42407900  | -5.55988500 | -0.60335300 |
| H | 4.36203800  | -3.65811300 | -1.00624700 |
| H | 2.29461500  | -7.28911100 | 0.01967500  |
| H | 4.07635600  | -6.11824000 | -1.26962400 |
| C | -5.33943900 | -0.66648900 | -1.82399600 |
| C | -4.87956800 | -2.12276500 | -1.93769400 |
| H | -3.00635800 | -1.60501900 | -2.83876100 |
| C | -2.61730000 | -3.43375700 | -1.82896700 |
| C | -3.26265300 | -4.61968500 | -1.45307000 |
| C | -1.24527700 | -3.49096200 | -2.13020400 |
| C | -2.55700800 | -5.82419000 | -1.37248800 |
| H | -4.32499200 | -4.61774200 | -1.22971100 |
| C | -0.53763100 | -4.68777500 | -2.04088200 |
| H | -0.72553100 | -2.58130000 | -2.42205900 |
| C | -1.19347100 | -5.86221400 | -1.66037100 |
| H | -3.08009400 | -6.73253400 | -1.08433800 |
| H | 0.52643600  | -4.70338000 | -2.25741000 |
| H | -0.64224000 | -6.79549600 | -1.59030000 |
| C | -4.63254400 | 1.49346800  | -0.61379400 |
| C | -5.16849400 | 2.18571500  | 0.48103500  |
| C | -4.16583100 | 2.24174900  | -1.70695300 |
| C | -5.25304700 | 3.57956500  | 0.48142400  |
| H | -5.52633900 | 1.62670200  | 1.34229200  |
| C | -4.24917600 | 3.63402200  | -1.71117300 |

|   |             |             |             |
|---|-------------|-------------|-------------|
| H | -3.73897200 | 1.73490800  | -2.56854500 |
| C | -4.79954600 | 4.30914400  | -0.61824000 |
| H | -5.68050900 | 4.09261600  | 1.33885300  |
| H | -3.88748900 | 4.19209200  | -2.57058700 |
| H | -4.87547400 | 5.39309800  | -0.62713900 |
| C | 0.71105400  | 3.69229400  | 0.00234400  |
| C | 1.59701300  | 4.74847700  | 0.27046200  |
| C | -0.66981800 | 3.94340200  | 0.05729000  |
| C | 1.11448100  | 6.01914500  | 0.58304400  |
| H | 2.66592800  | 4.57011900  | 0.24018200  |
| C | -1.14926600 | 5.21559400  | 0.36510800  |
| H | -1.36775300 | 3.13473500  | -0.13263300 |
| C | -0.25968100 | 6.26032600  | 0.62987600  |
| H | 1.81666100  | 6.82159400  | 0.79424400  |
| H | -2.22176000 | 5.38489300  | 0.40363500  |
| H | -0.63429500 | 7.25083400  | 0.87469200  |
| O | 2.60364300  | 2.16099200  | -0.06948700 |
| C | 3.00000900  | 1.79647700  | 1.17799400  |
| O | 2.26487000  | 1.73425800  | 2.14470500  |
| C | 4.46365400  | 1.50573200  | 1.23548300  |
| C | 5.26573800  | 1.44677800  | 0.08675200  |
| C | 5.03349400  | 1.28139500  | 2.49745100  |
| C | 6.62697700  | 1.16648700  | 0.20768900  |
| H | 4.82327400  | 1.61209000  | -0.88867500 |
| C | 6.39377600  | 1.00669300  | 2.61235900  |
| H | 4.39282800  | 1.33012200  | 3.37190000  |
| C | 7.19271200  | 0.94892800  | 1.46621100  |
| H | 7.24472900  | 1.11517000  | -0.68469400 |
| H | 6.83237000  | 0.83758900  | 3.59217500  |
| H | 8.25442100  | 0.73275700  | 1.55494700  |
| C | 2.50847500  | 1.39507100  | -2.81449800 |
| C | 3.67410600  | 1.76678200  | -3.51674600 |
| C | 2.43079700  | 0.05214500  | -2.38569500 |
| C | 4.68523400  | 0.84759600  | -3.80423900 |
| H | 3.79448400  | 2.78760000  | -3.86170400 |
| C | 3.43987800  | -0.86595500 | -2.67162000 |
| H | 1.59261800  | -0.26616900 | -1.77850900 |
| C | 4.57320200  | -0.47980100 | -3.39082400 |
| H | 5.56040400  | 1.17466300  | -4.36130300 |
| H | 3.33554200  | -1.89087100 | -2.32484800 |
| H | 5.35547700  | -1.19885900 | -3.62032500 |
| H | 2.67206000  | 4.16686400  | -2.31040900 |
| H | 1.96908000  | 3.99534500  | -3.92337100 |
| H | 0.95987800  | 4.50907400  | -2.57129600 |

|   |             |             |             |
|---|-------------|-------------|-------------|
| H | 2.04306100  | -3.54468700 | 3.95657900  |
| H | 2.50542200  | -2.17587400 | 2.94513900  |
| H | -0.10104900 | -2.43193600 | 4.52954200  |
| H | 1.17809400  | -1.26333700 | 4.85688400  |
| H | -6.42539800 | -0.58148900 | -1.70099800 |
| H | -5.08216300 | -0.12810800 | -2.74419200 |
| H | -5.25750700 | -2.60431200 | -2.84792200 |
| H | -5.27027900 | -2.69406000 | -1.08601600 |

**TS3\_b3**

|    |             |             |             |
|----|-------------|-------------|-------------|
| C  | 3.51683200  | 1.18311300  | -1.01637100 |
| C  | 2.70985000  | 2.42334800  | -0.59421500 |
| H  | 4.25579600  | 0.94329900  | -0.24316400 |
| H  | 4.07241800  | 1.40342700  | -1.93656300 |
| H  | 2.11565600  | 2.78627700  | -1.44124000 |
| H  | 3.39951400  | 3.22875400  | -0.31373400 |
| P  | 1.45708200  | 2.12073900  | 0.76458800  |
| P  | 2.50447200  | -0.38067100 | -1.22828500 |
| C  | 0.44938000  | -1.24648200 | 2.24195900  |
| C  | -0.33822600 | -2.26888400 | 1.74192600  |
| H  | 1.51733400  | -1.43622800 | 2.33881800  |
| C  | -1.99069700 | -1.53108200 | -0.44628500 |
| C  | -1.75979500 | -2.42943400 | 1.68599500  |
| Cu | 0.66969600  | -0.14270000 | 0.35641500  |
| O  | -1.11796200 | -0.62478300 | -0.52040100 |
| C  | 0.66868000  | 3.85026400  | 0.89234700  |
| H  | 1.38195600  | 4.53038200  | 0.40695900  |
| C  | 2.37320800  | 2.31122000  | 2.44069300  |
| C  | 1.98227600  | -0.41741300 | -3.06240400 |
| H  | 1.12129100  | -1.09719400 | -3.05715000 |
| C  | 3.90739300  | -1.64951200 | -1.49349600 |
| C  | -2.18002300 | -3.89358600 | 1.58966800  |
| H  | 0.21391000  | -3.08332800 | 1.26876600  |
| H  | 0.02990800  | -0.49371600 | 2.90520900  |
| O  | -3.31072300 | -0.91921700 | -0.44926900 |
| C  | -1.84850900 | -2.77052400 | -1.28211100 |
| C  | -0.54164200 | -3.13339100 | -1.65730500 |
| C  | -2.90993200 | -3.56514600 | -1.74218500 |
| C  | -0.29997100 | -4.25406000 | -2.44800200 |
| H  | 0.27866100  | -2.51376800 | -1.31493500 |
| C  | -2.66559500 | -4.68365800 | -2.54219300 |
| H  | -3.92819300 | -3.33498400 | -1.46499400 |
| C  | -1.36501000 | -5.03907800 | -2.89787700 |

|   |             |             |             |
|---|-------------|-------------|-------------|
| H | 0.72064600  | -4.51454200 | -2.72013200 |
| H | -3.50588900 | -5.28081000 | -2.88706800 |
| H | -1.18201900 | -5.91253200 | -3.51805900 |
| C | -4.50777600 | -1.37988400 | -0.03852400 |
| C | -5.58214900 | -0.35997300 | -0.25978900 |
| C | -5.37393700 | 0.80659200  | -1.00856200 |
| C | -6.84944100 | -0.62190000 | 0.27847100  |
| C | -6.42626200 | 1.69931700  | -1.21402300 |
| H | -4.39303200 | 1.00272900  | -1.42616200 |
| C | -7.89515400 | 0.27703700  | 0.07989600  |
| H | -6.99086800 | -1.53339500 | 0.84935800  |
| C | -7.68600200 | 1.43863700  | -0.66858900 |
| H | -6.26396300 | 2.59748200  | -1.80443900 |
| H | -8.87373500 | 0.07196400  | 0.50561100  |
| H | -8.50324600 | 2.13731700  | -0.82863900 |
| O | -4.73708700 | -2.47733700 | 0.43241700  |
| H | -3.21402200 | -3.99772200 | 1.25811600  |
| H | -1.54141400 | -4.43134400 | 0.88185700  |
| H | -2.07904400 | -4.40462800 | 2.55976500  |
| C | -2.61563400 | -1.54686800 | 2.53343600  |
| C | -3.58461000 | -2.08436500 | 3.40549900  |
| C | -2.49801100 | -0.14150000 | 2.50536500  |
| C | -4.37051100 | -1.26930300 | 4.21901000  |
| H | -3.73040600 | -3.15778800 | 3.44831700  |
| C | -3.28993000 | 0.67582600  | 3.31243000  |
| H | -1.80388100 | 0.30912800  | 1.80600500  |
| C | -4.22789600 | 0.11896000  | 4.18334600  |
| H | -5.10150900 | -1.72479900 | 4.88324900  |
| H | -3.17783500 | 1.75689200  | 3.25492400  |
| H | -4.84222800 | 0.75523100  | 4.81524200  |
| C | 0.70319500  | 4.15601700  | 2.40755000  |
| H | 0.48605000  | 5.21529000  | 2.58887200  |
| H | -0.07342400 | 3.57709300  | 2.92418600  |
| C | 2.09146400  | 3.75586500  | 2.91428200  |
| H | 2.83430400  | 4.44833900  | 2.50049100  |
| H | 2.16991200  | 3.82218100  | 4.00613700  |
| H | 1.81201700  | 1.63278700  | 3.09413500  |
| C | -0.67985000 | 4.04606900  | 0.23862300  |
| C | -0.85372200 | 5.05914000  | -0.71493200 |
| C | -1.79300700 | 3.27298900  | 0.59835300  |
| C | -2.10447100 | 5.30191300  | -1.28682400 |
| H | -0.00158300 | 5.66892600  | -1.00793000 |
| C | -3.04466400 | 3.51300500  | 0.03321700  |
| H | -1.68055400 | 2.46881600  | 1.31879500  |

|   |             |             |             |
|---|-------------|-------------|-------------|
| C | -3.20529300 | 4.53036900  | -0.91153100 |
| H | -2.21701800 | 6.09666900  | -2.01998600 |
| H | -3.89088400 | 2.89971000  | 0.32716800  |
| H | -4.18193400 | 4.72001800  | -1.34925200 |
| C | 3.81957800  | 1.86570100  | 2.46251500  |
| C | 4.13802800  | 0.56549500  | 2.88763300  |
| C | 4.87552800  | 2.70228700  | 2.06376800  |
| C | 5.45715400  | 0.11099100  | 2.90372800  |
| H | 3.34057900  | -0.09740900 | 3.21386400  |
| C | 6.19712500  | 2.25233000  | 2.08176300  |
| H | 4.67337700  | 3.71977500  | 1.74180200  |
| C | 6.49451800  | 0.95369600  | 2.49904900  |
| H | 5.66972500  | -0.90209600 | 3.23274900  |
| H | 6.99570600  | 2.92220200  | 1.77323100  |
| H | 7.52390100  | 0.60592500  | 2.51662500  |
| C | 3.13462400  | -1.12721900 | -3.79796800 |
| H | 2.80662200  | -1.49639500 | -4.77743900 |
| H | 3.96775500  | -0.43591300 | -3.97801800 |
| C | 3.61788800  | -2.26116800 | -2.88642700 |
| H | 4.51421800  | -2.75612600 | -3.27868900 |
| H | 2.83976600  | -3.03043300 | -2.80423800 |
| H | 4.82095000  | -1.04784700 | -1.58476200 |
| C | 1.50400600  | 0.91956400  | -3.58699600 |
| C | 2.31006800  | 1.76797600  | -4.35985200 |
| C | 0.20530200  | 1.34924300  | -3.25800300 |
| C | 1.83693900  | 3.01249800  | -4.78634200 |
| H | 3.31134900  | 1.46091300  | -4.64740200 |
| C | -0.26270300 | 2.59479000  | -3.67498700 |
| H | -0.43346400 | 0.70588600  | -2.65666200 |
| C | 0.55241000  | 3.43287200  | -4.44175700 |
| H | 2.47650500  | 3.65030600  | -5.39146400 |
| H | -1.26313300 | 2.91211400  | -3.39526500 |
| H | 0.18611300  | 4.40150000  | -4.77142700 |
| C | 4.12190300  | -2.65152000 | -0.37986700 |
| C | 5.34439100  | -2.68349200 | 0.30578400  |
| C | 3.13614500  | -3.58393600 | -0.01800800 |
| C | 5.58022200  | -3.61585900 | 1.31891500  |
| H | 6.12206900  | -1.97032400 | 0.04162500  |
| C | 3.36759400  | -4.51632100 | 0.99324300  |
| H | 2.17575500  | -3.58416600 | -0.52556300 |
| C | 4.59156300  | -4.53640400 | 1.66711100  |
| H | 6.53951200  | -3.62457200 | 1.83036700  |
| H | 2.58934800  | -5.22826100 | 1.25485800  |
| H | 4.77128900  | -5.26400500 | 2.45381400  |

**TS3\_b4**

|    |             |             |             |
|----|-------------|-------------|-------------|
| C  | 1.72853000  | -2.92222400 | 0.74562700  |
| C  | 2.70382700  | -1.88697400 | 1.33210000  |
| H  | 2.25109500  | -3.87545900 | 0.59835300  |
| H  | 0.91281000  | -3.10474900 | 1.45663500  |
| H  | 2.95209300  | -2.16751500 | 2.36250900  |
| H  | 3.63801100  | -1.89372100 | 0.75925900  |
| P  | 2.11052400  | -0.11437100 | 1.25599400  |
| P  | 0.85180000  | -2.41370500 | -0.82835500 |
| C  | 0.57338100  | 1.09855900  | -2.49314500 |
| C  | -0.73007700 | 1.56095000  | -2.53553800 |
| H  | 0.82267600  | 0.24487600  | -3.12126500 |
| C  | -1.93648700 | 1.79095100  | -0.05169900 |
| C  | -1.33785200 | 2.74763500  | -2.01192600 |
| Cu | 0.42007300  | -0.06064300 | -0.59179200 |
| O  | -0.92684600 | 1.17167800  | 0.37126100  |
| C  | 1.14693300  | 0.25725900  | 2.86543100  |
| C  | 3.67114100  | 0.78746100  | 1.86600700  |
| H  | 4.25149800  | 0.03053200  | 2.41205300  |
| C  | -0.13367800 | -4.00395900 | -1.19339500 |
| H  | 0.43460800  | -4.79460200 | -0.68392000 |
| C  | 2.04524200  | -2.72350900 | -2.30502900 |
| C  | -2.65834500 | 3.09615200  | -2.68667800 |
| C  | -2.46661500 | 2.98543100  | 0.66780300  |
| C  | -3.77216400 | 3.46911800  | 0.47801600  |
| C  | -1.63222200 | 3.64878700  | 1.58203200  |
| C  | -4.22384200 | 4.58818200  | 1.17711700  |
| H  | -4.44168100 | 2.96008200  | -0.20598800 |
| C  | -2.08426400 | 4.76881500  | 2.27499500  |
| H  | -0.63014100 | 3.27107600  | 1.74318600  |
| C  | -3.38185800 | 5.24604200  | 2.07527600  |
| H  | -5.23976900 | 4.94225800  | 1.02168700  |
| H  | -1.42256600 | 5.26839600  | 2.97795300  |
| H  | -3.73497400 | 6.11843400  | 2.61886100  |
| H  | -1.44701400 | 0.87141500  | -2.98557100 |
| H  | 1.40067100  | 1.76219600  | -2.25582500 |
| C  | -3.79083800 | 0.27826900  | 0.19893500  |
| O  | -3.00533000 | 0.99342200  | -0.64652400 |
| O  | -3.58144600 | 0.13796500  | 1.38693800  |
| C  | -4.99154600 | -0.29108300 | -0.49101300 |
| C  | -5.18706100 | -0.20029000 | -1.87575100 |
| C  | -5.95869500 | -0.92048100 | 0.30509700  |



|   |             |             |             |
|---|-------------|-------------|-------------|
| C | -6.33471400 | -0.74161900 | -2.45648900 |
| H | -4.44004800 | 0.28867400  | -2.49003100 |
| C | -7.10793200 | -1.45237400 | -0.27537700 |
| H | -5.78811100 | -0.97881000 | 1.37478700  |
| C | -7.29682700 | -1.36644100 | -1.65833100 |
| H | -6.48114000 | -0.67063800 | -3.53093300 |
| H | -7.85759300 | -1.93272700 | 0.34773600  |
| H | -8.19308500 | -1.78156800 | -2.11201400 |
| C | 3.11899900  | 1.77818900  | 2.91880000  |
| C | 2.13972800  | 0.99007300  | 3.79613900  |
| H | 0.40123100  | 0.97924800  | 2.51670200  |
| C | 0.39346500  | -0.92053500 | 3.44719200  |
| C | 0.98537700  | -1.84637500 | 4.32216600  |
| C | -0.94913900 | -1.11608600 | 3.08054200  |
| C | 0.26122300  | -2.93699900 | 4.80951300  |
| H | 2.01650800  | -1.71780200 | 4.64072900  |
| C | -1.67087000 | -2.20821200 | 3.56371200  |
| H | -1.43635100 | -0.40884300 | 2.41525600  |
| C | -1.06901000 | -3.12495700 | 4.42907600  |
| H | 0.73851600  | -3.63673900 | 5.49142200  |
| H | -2.70580600 | -2.33148300 | 3.25816100  |
| H | -1.63228200 | -3.97239300 | 4.81172900  |
| C | 4.58086800  | 1.40581600  | 0.82695800  |
| C | 5.96714000  | 1.21063600  | 0.91347100  |
| C | 4.09214900  | 2.22493900  | -0.20167800 |
| C | 6.83992000  | 1.81891800  | 0.00869800  |
| H | 6.36819300  | 0.57838000  | 1.70289700  |
| C | 4.95937100  | 2.83473600  | -1.10874900 |
| H | 3.02380500  | 2.38211700  | -0.30130300 |
| C | 6.33873900  | 2.63490300  | -1.00721500 |
| H | 7.91083600  | 1.65580400  | 0.10039500  |
| H | 4.55303700  | 3.46901400  | -1.89215500 |
| H | 7.01493800  | 3.11305800  | -1.71096800 |
| C | 0.07526200  | -4.20878400 | -2.70709900 |
| C | 1.57584700  | -4.04265000 | -2.96599500 |
| H | 1.79407600  | -1.90200900 | -2.98518600 |
| C | 3.52528600  | -2.62344900 | -2.00378000 |
| C | 4.26149300  | -3.69339600 | -1.46866900 |
| C | 4.20251000  | -1.41798200 | -2.24928700 |
| C | 5.62202000  | -3.55973700 | -1.18505600 |
| H | 3.77673000  | -4.64532000 | -1.27103500 |
| C | 5.56051200  | -1.27827500 | -1.96173000 |
| H | 3.65640600  | -0.57534600 | -2.66608000 |
| C | 6.27704900  | -2.35098100 | -1.42747200 |

|   |             |             |             |
|---|-------------|-------------|-------------|
| H | 6.16965900  | -4.40455300 | -0.77500000 |
| H | 6.05313200  | -0.32886900 | -2.14871100 |
| H | 7.33553400  | -2.24692600 | -1.20508100 |
| C | -1.55605000 | -4.08032500 | -0.69068000 |
| C | -1.83148200 | -4.79182300 | 0.48685500  |
| C | -2.63159000 | -3.50457800 | -1.38324900 |
| C | -3.13745300 | -4.93179100 | 0.95756100  |
| H | -1.01236900 | -5.24986500 | 1.03713000  |
| C | -3.93985400 | -3.65301700 | -0.92266900 |
| H | -2.45315600 | -2.94282700 | -2.29604100 |
| C | -4.19828000 | -4.36694900 | 0.24938900  |
| H | -3.32350500 | -5.49058800 | 1.87109500  |
| H | -4.75850600 | -3.20661400 | -1.47822900 |
| H | -5.21868500 | -4.47779400 | 0.60544900  |
| C | -0.49823000 | 3.91444000  | -1.61485000 |
| C | 0.65376200  | 3.77984100  | -0.81045200 |
| C | -0.83838400 | 5.22545800  | -2.00945400 |
| C | 1.42908700  | 4.88082100  | -0.44704700 |
| H | 0.90920800  | 2.80047900  | -0.42562200 |
| C | -0.06187100 | 6.32720800  | -1.65034300 |
| H | -1.71948200 | 5.39471300  | -2.61776000 |
| C | 1.08347700  | 6.16488400  | -0.87125900 |
| H | 2.30897900  | 4.73309300  | 0.17534100  |
| H | -0.35760900 | 7.31880900  | -1.98521100 |
| H | 1.69075300  | 7.02224300  | -0.59281400 |
| H | -3.26166800 | 3.77763200  | -2.07818600 |
| H | -2.50386400 | 3.58297700  | -3.66120700 |
| H | -3.25048800 | 2.19555200  | -2.86632000 |
| H | 3.93826700  | 2.21643500  | 3.50142700  |
| H | 2.60261500  | 2.60705900  | 2.41640200  |
| H | 2.70671200  | 0.27189000  | 4.40083000  |
| H | 1.59946800  | 1.63797900  | 4.49686200  |
| H | -0.28924200 | -5.19536600 | -3.01688400 |
| H | -0.49117500 | -3.46329100 | -3.27975600 |
| H | 2.10500800  | -4.89755700 | -2.52998900 |
| H | 1.81458000  | -4.03686400 | -4.03620900 |

#### Int4\_a1

|   |            |             |            |
|---|------------|-------------|------------|
| C | 3.18905600 | 1.22984200  | 1.22862700 |
| C | 3.69518700 | -0.16703600 | 0.82348600 |
| H | 3.58625000 | 1.98356300  | 0.53950100 |
| H | 3.56826100 | 1.47442400  | 2.22863400 |
| H | 3.43517700 | -0.89410400 | 1.60149000 |

|    |             |             |             |
|----|-------------|-------------|-------------|
| H  | 4.78967600  | -0.15711500 | 0.74470900  |
| P  | 2.93408300  | -0.84901200 | -0.74797200 |
| P  | 1.32194700  | 1.41011500  | 1.16998200  |
| C  | -0.04327800 | 0.50830100  | -2.77958500 |
| C  | -1.17927200 | 0.37837300  | -2.06009400 |
| H  | 0.46136300  | 1.46957400  | -2.83218700 |
| C  | -2.07491800 | -1.19469500 | -0.35143300 |
| C  | -2.07406600 | -0.84749500 | -1.94360500 |
| Cu | 0.65314600  | -0.14648600 | -0.55410600 |
| O  | -0.85425200 | -1.29872200 | 0.10108500  |
| C  | 3.70378500  | -2.59978500 | -0.77088500 |
| H  | 4.43112800  | -2.59729600 | 0.05090600  |
| C  | 4.05594100  | -0.23280900 | -2.17217500 |
| H  | 3.40244600  | -0.31553700 | -3.05049300 |
| C  | 0.73811800  | 0.98266800  | 2.92530500  |
| H  | -0.33371600 | 0.79146500  | 2.79585900  |
| C  | 1.13474200  | 3.29126600  | 1.44423200  |
| H  | 2.15717400  | 3.67271300  | 1.55938900  |
| C  | -1.43662400 | -2.05571400 | -2.65915300 |
| H  | -2.00035500 | -2.97150800 | -2.47094500 |
| H  | -1.40067000 | -1.89499700 | -3.74237800 |
| H  | -0.42492500 | -2.22255600 | -2.28350500 |
| C  | -3.45941700 | -0.54112000 | -2.54939200 |
| C  | -4.31209500 | -1.58249900 | -2.95705200 |
| C  | -3.92285300 | 0.77156000  | -2.75043100 |
| C  | -5.56315500 | -1.32827400 | -3.52130600 |
| H  | -4.00896000 | -2.61426500 | -2.82701200 |
| C  | -5.17229200 | 1.03127600  | -3.31664500 |
| H  | -3.30270100 | 1.61684100  | -2.47589200 |
| C  | -6.00430500 | -0.01840600 | -3.70521300 |
| H  | -6.19215000 | -2.16382800 | -3.81826600 |
| H  | -5.48940100 | 2.06157700  | -3.45962900 |
| H  | -6.97635400 | 0.18115900  | -4.14846000 |
| C  | -2.97071300 | -2.37784000 | 0.03901400  |
| C  | -4.36552100 | -2.29180100 | 0.14706100  |
| C  | -2.35354000 | -3.60950500 | 0.29477900  |
| C  | -5.12266400 | -3.41026200 | 0.50114700  |
| H  | -4.86101500 | -1.34470600 | -0.03297700 |
| C  | -3.11037700 | -4.72993800 | 0.64012300  |
| H  | -1.27250200 | -3.66808100 | 0.23677500  |
| C  | -4.49951500 | -4.63543700 | 0.74472700  |
| H  | -6.20264000 | -3.32039100 | 0.59005100  |
| H  | -2.61109400 | -5.67561000 | 0.83897100  |
| H  | -5.09038000 | -5.50545300 | 1.02095600  |

|   |             |             |             |
|---|-------------|-------------|-------------|
| H | -1.51626300 | 1.24676200  | -1.50181100 |
| H | 0.34497000  | -0.28370100 | -3.41326100 |
| O | -2.83684000 | 0.09111100  | 0.18412300  |
| C | 4.49796700  | -2.66514100 | -2.09756800 |
| C | 5.15846500  | -1.30206000 | -2.31454700 |
| H | 5.23003700  | -3.48049900 | -2.06253800 |
| H | 3.81830800  | -2.88468300 | -2.93055600 |
| H | 5.64693000  | -1.22835400 | -3.29402600 |
| H | 5.93884300  | -1.15705900 | -1.55744800 |
| C | 2.75624100  | -3.75817400 | -0.54871900 |
| C | 2.88035000  | -4.55509400 | 0.59754200  |
| C | 1.76591200  | -4.09272100 | -1.48443700 |
| C | 2.04678600  | -5.65636200 | 0.80320800  |
| H | 3.63816200  | -4.31040100 | 1.33815400  |
| C | 0.93114100  | -5.19142800 | -1.28363000 |
| H | 1.63926800  | -3.48740400 | -2.37817100 |
| C | 1.06963000  | -5.98000600 | -0.13856400 |
| H | 2.16510600  | -6.26183000 | 1.69807700  |
| H | 0.16798900  | -5.42869200 | -2.01960900 |
| H | 0.42050200  | -6.83739700 | 0.01673900  |
| C | 4.50769500  | 1.20882500  | -2.07985800 |
| C | 5.69633000  | 1.59242300  | -1.43771900 |
| C | 3.71544900  | 2.21895900  | -2.64960900 |
| C | 6.07086600  | 2.93561100  | -1.35968600 |
| H | 6.34680100  | 0.84210900  | -0.99878500 |
| C | 4.08390600  | 3.56175500  | -2.57084400 |
| H | 2.79848100  | 1.94572500  | -3.16555800 |
| C | 5.26579100  | 3.92726000  | -1.92239800 |
| H | 6.99870700  | 3.20463700  | -0.86149000 |
| H | 3.44710300  | 4.31938300  | -3.01877700 |
| H | 5.56080600  | 4.97145700  | -1.86472200 |
| C | 0.41494200  | 3.42442200  | 2.81209000  |
| C | 0.90365200  | 2.29054800  | 3.72055400  |
| H | 0.60143400  | 4.41516600  | 3.24370400  |
| H | -0.66899900 | 3.33615200  | 2.67344900  |
| H | 1.95585900  | 2.46278100  | 3.98299000  |
| H | 0.34119400  | 2.25022800  | 4.66159300  |
| C | 0.47868400  | 4.03934300  | 0.30415200  |
| C | -0.86813200 | 3.82703000  | -0.03265500 |
| C | 1.20565300  | 4.98052700  | -0.43797200 |
| C | -1.46690200 | 4.53736100  | -1.07286400 |
| H | -1.45982600 | 3.10494300  | 0.52324400  |
| C | 0.61025100  | 5.69010100  | -1.48416800 |
| H | 2.24963400  | 5.16162700  | -0.19205400 |

|   |             |             |             |
|---|-------------|-------------|-------------|
| C | -0.72980100 | 5.47177900  | -1.80565000 |
| H | -2.51524500 | 4.36487400  | -1.30205800 |
| H | 1.19298000  | 6.42030300  | -2.04045200 |
| H | -1.19779200 | 6.02711300  | -2.61406600 |
| C | 1.35021600  | -0.28399200 | 3.48516900  |
| C | 2.41577500  | -0.27530100 | 4.39740500  |
| C | 0.83653400  | -1.52359900 | 3.05989600  |
| C | 2.96205700  | -1.47161800 | 4.87198500  |
| H | 2.81886400  | 0.66605700  | 4.75994700  |
| C | 1.38753600  | -2.71491400 | 3.53221900  |
| H | 0.00469200  | -1.54633500 | 2.35809100  |
| C | 2.45232300  | -2.69586600 | 4.43881000  |
| H | 3.78126800  | -1.44201500 | 5.58649700  |
| H | 0.97746500  | -3.66114500 | 3.19058100  |
| H | 2.87258000  | -3.62625100 | 4.81294600  |
| C | -2.90173800 | 0.34652800  | 1.48734000  |
| O | -2.38917100 | -0.30463000 | 2.38542600  |
| C | -3.70306700 | 1.59130900  | 1.78446300  |
| C | -3.72215000 | 2.06318300  | 3.10462000  |
| C | -4.43781100 | 2.26875200  | 0.80070500  |
| C | -4.44861800 | 3.20623200  | 3.43449500  |
| H | -3.16986500 | 1.50905200  | 3.85679300  |
| C | -5.17143100 | 3.40828400  | 1.13519200  |
| H | -4.44263400 | 1.88817200  | -0.21459600 |
| C | -5.17406900 | 3.88224300  | 2.44932200  |
| H | -4.45632400 | 3.56664100  | 4.45993600  |
| H | -5.74646800 | 3.92394300  | 0.37019600  |
| H | -5.74469800 | 4.77102200  | 2.70653000  |

#### Int4\_a2

|    |             |             |             |
|----|-------------|-------------|-------------|
| C  | -2.82247000 | 2.43776100  | 0.49712600  |
| C  | -3.58430100 | 1.21584900  | 1.04436400  |
| H  | -2.18506100 | 2.85537700  | 1.28508900  |
| H  | -3.53815000 | 3.22008400  | 0.21279800  |
| H  | -4.39095000 | 0.94205200  | 0.35509000  |
| H  | -4.05183900 | 1.48356200  | 2.00015300  |
| P  | -2.54212600 | -0.33137600 | 1.22989700  |
| P  | -1.65234500 | 2.09419000  | -0.92567500 |
| C  | 1.85018400  | -1.48457400 | 0.23625800  |
| C  | 0.85043800  | -1.13453400 | -2.02238300 |
| C  | 1.52000500  | -2.21295500 | -1.18675600 |
| Cu | -0.65568100 | 0.01252500  | -0.36407700 |
| C  | -3.88391500 | -1.58650100 | 1.77170000  |

|   |             |             |             |
|---|-------------|-------------|-------------|
| H | -4.80312200 | -0.99799300 | 1.88632000  |
| C | -1.78496600 | -0.23221400 | 2.97377900  |
| H | -0.94344600 | -0.93085100 | 2.89693100  |
| C | -2.73312300 | 2.18291900  | -2.50540900 |
| H | -2.13861200 | 1.62797900  | -3.24299400 |
| C | -0.94169800 | 3.84688000  | -1.20165400 |
| H | -1.54031700 | 4.49383900  | -0.54752700 |
| C | 0.52425300  | -3.35331900 | -0.89544000 |
| H | 0.26770800  | -3.89263100 | -1.81363100 |
| H | 0.93437800  | -4.07268100 | -0.18461500 |
| H | -0.38966800 | -2.94738000 | -0.45725300 |
| C | 2.75061400  | -2.76008300 | -1.94038100 |
| C | 3.24757900  | -4.04707200 | -1.66963300 |
| C | 3.40879400  | -2.02588600 | -2.94373700 |
| C | 4.34817200  | -4.56776300 | -2.35262300 |
| H | 2.78056700  | -4.65960400 | -0.90824000 |
| C | 4.50670000  | -2.54342700 | -3.63288500 |
| H | 3.06348800  | -1.03320800 | -3.20811700 |
| C | 4.98698600  | -3.82007400 | -3.34074500 |
| H | 4.70198000  | -5.56625800 | -2.10804400 |
| H | 4.98206200  | -1.94413700 | -4.40576000 |
| H | 5.84034800  | -4.22611300 | -3.87739600 |
| C | -3.44059800 | -2.05261700 | 3.18190700  |
| C | -2.84074800 | -0.84790700 | 3.91183700  |
| H | -4.28971300 | -2.48887800 | 3.72185200  |
| H | -2.68384300 | -2.84185800 | 3.09012200  |
| H | -2.39138300 | -1.13056000 | 4.87190600  |
| H | -3.63687200 | -0.12539000 | 4.13312600  |
| C | -4.16627700 | -2.71472500 | 0.80430900  |
| C | -5.44447100 | -2.86829500 | 0.24997600  |
| C | -3.18036800 | -3.65431800 | 0.46271600  |
| C | -5.73363300 | -3.92528400 | -0.61686100 |
| H | -6.22346300 | -2.15245200 | 0.50270400  |
| C | -3.46350400 | -4.70969700 | -0.40376800 |
| H | -2.18045500 | -3.56145300 | 0.87785600  |
| C | -4.74299100 | -4.85027200 | -0.94823500 |
| H | -6.73539400 | -4.02743000 | -1.02685400 |
| H | -2.68327100 | -5.42425700 | -0.65240100 |
| H | -4.96459300 | -5.67505700 | -1.62015500 |
| C | -1.20891500 | 1.11730600  | 3.34966100  |
| C | -1.94674900 | 2.09219700  | 4.03976900  |
| C | 0.11668200  | 1.41092000  | 2.98377500  |
| C | -1.37948100 | 3.33189500  | 4.34804100  |
| H | -2.96648800 | 1.88918800  | 4.35563900  |

|   |             |             |             |
|---|-------------|-------------|-------------|
| C | 0.68006000  | 2.64981200  | 3.29190100  |
| H | 0.71101600  | 0.66978500  | 2.45336900  |
| C | -0.06520600 | 3.61668600  | 3.97225200  |
| H | -1.96533700 | 4.07033600  | 4.89050900  |
| H | 1.70743800  | 2.84306000  | 2.99815700  |
| H | 0.37655900  | 4.57909600  | 4.21876300  |
| C | -1.30931100 | 4.19691800  | -2.66383400 |
| C | -2.71879400 | 3.66574700  | -2.92686400 |
| H | -1.23517600 | 5.27891400  | -2.82396600 |
| H | -0.59621300 | 3.72481000  | -3.35160000 |
| H | -3.43387100 | 4.24441400  | -2.32958000 |
| H | -3.01737600 | 3.77428700  | -3.97684800 |
| C | 0.51537500  | 4.06835600  | -0.86639600 |
| C | 1.54213000  | 3.42031400  | -1.57021200 |
| C | 0.87025000  | 4.99292200  | 0.12467300  |
| C | 2.88073500  | 3.69809600  | -1.29947700 |
| H | 1.29414500  | 2.69114900  | -2.33840400 |
| C | 2.21024500  | 5.27178800  | 0.40138200  |
| H | 0.08860100  | 5.50282500  | 0.68340100  |
| C | 3.21987700  | 4.62760800  | -0.31269300 |
| H | 3.66245000  | 3.18160200  | -1.84787100 |
| H | 2.46158800  | 5.99426500  | 1.17362600  |
| H | 4.26430800  | 4.83321000  | -0.09905600 |
| C | -4.08757400 | 1.51108500  | -2.41916600 |
| C | -5.25734400 | 2.20438600  | -2.07001400 |
| C | -4.19537200 | 0.13746600  | -2.69286500 |
| C | -6.48678100 | 1.54570000  | -1.98941300 |
| H | -5.22215600 | 3.27005100  | -1.86605500 |
| C | -5.41945300 | -0.52467000 | -2.60830400 |
| H | -3.30520500 | -0.41970000 | -2.97365800 |
| C | -6.57344800 | 0.17858100  | -2.25443900 |
| H | -7.37840900 | 2.10745800  | -1.72287200 |
| H | -5.46907500 | -1.58967900 | -2.81426400 |
| H | -7.53059600 | -0.33228300 | -2.19410000 |
| O | 0.78594300  | -0.86488100 | 0.69978300  |
| C | -0.36346300 | -1.18723900 | -2.60444000 |
| H | -1.01011900 | -2.05708800 | -2.54120200 |
| H | -0.70651300 | -0.37454300 | -3.23948900 |
| H | 1.44008100  | -0.23051900 | -2.15579400 |
| C | 2.48249400  | -2.44190200 | 1.26281100  |
| C | 3.83149600  | -2.82128700 | 1.23079200  |
| C | 1.66682400  | -2.97485600 | 2.26880700  |
| C | 4.34811400  | -3.70514300 | 2.18048400  |
| H | 4.48712700  | -2.41362200 | 0.46981800  |

|   |            |             |             |
|---|------------|-------------|-------------|
| C | 2.17749400 | -3.86491800 | 3.21402200  |
| H | 0.62781900 | -2.66683900 | 2.30466800  |
| C | 3.52326800 | -4.23451700 | 3.17404100  |
| H | 5.40034500 | -3.97639500 | 2.14306100  |
| H | 1.52603500 | -4.26241000 | 3.98897900  |
| H | 3.92632800 | -4.92204200 | 3.91353300  |
| O | 2.97890000 | -0.51919000 | -0.19294800 |
| C | 3.52303600 | 0.30716500  | 0.71190000  |
| O | 3.12224300 | 0.49589400  | 1.84661700  |
| C | 4.75912400 | 0.99067100  | 0.18871500  |
| C | 5.30175000 | 0.71442900  | -1.07359500 |
| C | 5.39746300 | 1.91667300  | 1.02481800  |
| C | 6.45963900 | 1.36953900  | -1.49714500 |
| H | 4.82296800 | -0.02165700 | -1.70887100 |
| C | 6.55441500 | 2.56835400  | 0.60165000  |
| H | 4.96934800 | 2.10467500  | 2.00374500  |
| C | 7.08607400 | 2.29923900  | -0.66338200 |
| H | 6.87802100 | 1.14769800  | -2.47567700 |
| H | 7.04571800 | 3.28224600  | 1.25801800  |
| H | 7.98947700 | 2.80571200  | -0.99397100 |

#### Int4\_b1

|    |             |             |             |
|----|-------------|-------------|-------------|
| C  | 3.14202100  | -0.14170100 | 1.42655000  |
| C  | 2.69454700  | -1.60689700 | 1.57684600  |
| H  | 3.90056500  | -0.06461800 | 0.63924800  |
| H  | 3.61172300  | 0.19467000  | 2.35883300  |
| H  | 2.03541100  | -1.70353800 | 2.44781900  |
| H  | 3.56664600  | -2.24559000 | 1.76439200  |
| P  | 1.70656300  | -2.25955200 | 0.12058800  |
| P  | 1.76331600  | 1.02578400  | 0.91979600  |
| C  | 0.24630400  | -0.32529900 | -2.84895000 |
| C  | -0.72096400 | 0.52250100  | -2.43892700 |
| H  | 1.25167100  | 0.04607300  | -3.03089500 |
| C  | -2.47800100 | 0.41769000  | -0.65675700 |
| C  | -2.20833500 | 0.25551900  | -2.24905400 |
| Cu | 0.31452000  | -0.37374200 | -0.40943600 |
| O  | -1.64088600 | -0.25814500 | 0.06947800  |
| C  | 1.26147600  | -4.01456400 | 0.74604500  |
| H  | 1.83521800  | -4.11866800 | 1.67913100  |
| C  | 3.01348100  | -2.92597800 | -1.11127000 |
| H  | 2.46676100  | -2.93719200 | -2.06294800 |
| C  | 1.04868900  | 1.71927900  | 2.54250400  |
| H  | 0.06571000  | 2.09185900  | 2.23580100  |



|   |              |              |              |
|---|--------------|--------------|--------------|
| C | 2. 76604500  | 2. 61132000  | 0. 55870400  |
| H | 3. 79598600  | 2. 37148300  | 0. 85288300  |
| C | -3. 95144100 | 0. 24242500  | -0. 26782900 |
| C | -4. 93785600 | 1. 21120200  | -0. 50094200 |
| C | -4. 33348800 | -0. 96555500 | 0. 32873500  |
| C | -6. 26939800 | 0. 97493900  | -0. 15391500 |
| H | -4. 66287700 | 2. 16837500  | -0. 92967800 |
| C | -5. 66454400 | -1. 20574000 | 0. 67053400  |
| H | -3. 57256500 | -1. 70996600 | 0. 52844300  |
| C | -6. 64053700 | -0. 23742500 | 0. 42896100  |
| H | -7. 01540700 | 1. 74531900  | -0. 33406800 |
| H | -5. 93859800 | -2. 15238500 | 1. 13065100  |
| H | -7. 67760800 | -0. 42221500 | 0. 69814800  |
| H | -0. 44031500 | 1. 55786000  | -2. 25684300 |
| H | 0. 03764800  | -1. 35728600 | -3. 11460900 |
| O | -2. 21540100 | 2. 03331100  | -0. 51787000 |
| C | 1. 89166700  | -4. 96997600 | -0. 28909500 |
| C | 3. 24719700  | -4. 39157900 | -0. 69600100 |
| H | 1. 99498200  | -5. 98117300 | 0. 12144900  |
| H | 1. 24176500  | -5. 04412800 | -1. 17103000 |
| H | 3. 70874500  | -4. 95758500 | -1. 51438500 |
| H | 3. 93304300  | -4. 44875700 | 0. 15806500  |
| C | -0. 20138300 | -4. 26780500 | 1. 07629400  |
| C | -0. 83886800 | -5. 46065900 | 0. 70047100  |
| C | -0. 93169500 | -3. 34249200 | 1. 83735200  |
| C | -2. 16042800 | -5. 72013100 | 1. 07327800  |
| H | -0. 30491000 | -6. 20604200 | 0. 11980500  |
| C | -2. 25044500 | -3. 59972700 | 2. 21098700  |
| H | -0. 47733300 | -2. 40452400 | 2. 14167500  |
| C | -2. 87226900 | -4. 79083700 | 1. 83077300  |
| H | -2. 62931300 | -6. 65270500 | 0. 76986100  |
| H | -2. 79387300 | -2. 85865000 | 2. 79014100  |
| H | -3. 90065400 | -4. 98994500 | 2. 11957500  |
| C | 4. 24904700  | -2. 07392200 | -1. 30847100 |
| C | 5. 40759500  | -2. 22763500 | -0. 52946500 |
| C | 4. 25987000  | -1. 09128000 | -2. 31171400 |
| C | 6. 52895100  | -1. 42257900 | -0. 74039000 |
| H | 5. 44776000  | -2. 98746200 | 0. 24481600  |
| C | 5. 37698800  | -0. 28379200 | -2. 52443100 |
| H | 3. 38028700  | -0. 96208700 | -2. 93707600 |
| C | 6. 51906900  | -0. 44539900 | -1. 73697700 |
| H | 7. 41463400  | -1. 56669400 | -0. 12699100 |
| H | 5. 35201200  | 0. 46872400  | -3. 30722500 |
| H | 7. 39465700  | 0. 17593000  | -1. 90442000 |

|   |              |              |              |
|---|--------------|--------------|--------------|
| C | 2. 22161100  | 3. 65958000  | 1. 56140800  |
| C | 1. 93201000  | 2. 93737000  | 2. 88079400  |
| H | 2. 94260300  | 4. 47691100  | 1. 68307200  |
| H | 1. 29627300  | 4. 10436600  | 1. 17674000  |
| H | 2. 87847900  | 2. 62322700  | 3. 33991600  |
| H | 1. 42653900  | 3. 59013700  | 3. 60274600  |
| C | 2. 78350600  | 3. 05981300  | -0. 88592400 |
| C | 1. 61803700  | 3. 50109500  | -1. 53352200 |
| C | 3. 98482700  | 3. 06617300  | -1. 60816800 |
| C | 1. 65729100  | 3. 93453500  | -2. 85880900 |
| H | 0. 67161600  | 3. 51090600  | -0. 99968600 |
| C | 4. 02689300  | 3. 49852100  | -2. 93613100 |
| H | 4. 89897600  | 2. 72958000  | -1. 12445400 |
| C | 2. 86174400  | 3. 93430800  | -3. 56759800 |
| H | 0. 74391800  | 4. 27756700  | -3. 33782200 |
| H | 4. 97269000  | 3. 50144300  | -3. 47243000 |
| H | 2. 89048400  | 4. 27503300  | -4. 59906800 |
| C | 0. 80996200  | 0. 70478700  | 3. 64043300  |
| C | 1. 78303100  | 0. 37795600  | 4. 59807500  |
| C | -0. 44350600 | 0. 07003800  | 3. 71582100  |
| C | 1. 51891400  | -0. 56062100 | 5. 59891200  |
| H | 2. 75275500  | 0. 86762200  | 4. 58193700  |
| C | -0. 70537700 | -0. 86379000 | 4. 71994100  |
| H | -1. 21235600 | 0. 32604200  | 2. 98992500  |
| C | 0. 27348800  | -1. 18680500 | 5. 66330700  |
| H | 2. 28588100  | -0. 79292700 | 6. 33374200  |
| H | -1. 68425800 | -1. 33345900 | 4. 77034700  |
| H | 0. 06414700  | -1. 91103900 | 6. 44617400  |
| C | -2. 21232800 | 2. 60382000  | 0. 67520100  |
| O | -2. 35605700 | 2. 04898600  | 1. 75716300  |
| C | -2. 00075600 | 4. 10103300  | 0. 60407800  |
| C | -1. 90614800 | 4. 81066000  | 1. 80968500  |
| C | -1. 91981600 | 4. 79987600  | -0. 60844700 |
| C | -1. 71887400 | 6. 19209000  | 1. 80402900  |
| H | -1. 99437600 | 4. 25610700  | 2. 73832700  |
| C | -1. 73571200 | 6. 18351800  | -0. 61399600 |
| H | -2. 01063900 | 4. 25504000  | -1. 54175500 |
| C | -1. 63198800 | 6. 88182500  | 0. 59123500  |
| H | -1. 64685500 | 6. 73302900  | 2. 74411200  |
| H | -1. 67673900 | 6. 71748800  | -1. 55895200 |
| H | -1. 48900900 | 7. 95937600  | 0. 58568200  |
| C | -2. 60923100 | -1. 16711500 | -2. 70257500 |
| C | -2. 19561000 | -2. 31323800 | -1. 99692500 |
| C | -3. 38225400 | -1. 37703800 | -3. 85706100 |

|   |             |             |             |
|---|-------------|-------------|-------------|
| C | -2.53743800 | -3.59695100 | -2.42426400 |
| H | -1.62752200 | -2.19221100 | -1.08371700 |
| C | -3.72319800 | -2.66096500 | -4.28981700 |
| H | -3.73826800 | -0.53686900 | -4.44047400 |
| C | -3.30153000 | -3.78130800 | -3.57716300 |
| H | -2.21270800 | -4.45212100 | -1.83729000 |
| H | -4.32642600 | -2.77743100 | -5.18702500 |
| H | -3.57002100 | -4.78098400 | -3.90978700 |
| C | -2.93744900 | 1.32744300  | -3.09471500 |
| H | -2.65119300 | 1.24993400  | -4.14908700 |
| H | -4.02263400 | 1.21647700  | -3.02548400 |
| H | -2.67397200 | 2.32642700  | -2.74847000 |

### Int4\_b2

|    |             |             |             |
|----|-------------|-------------|-------------|
| C  | 1.78339900  | -2.71589800 | 0.92997400  |
| C  | 2.91620800  | -1.69078900 | 1.10359000  |
| H  | 1.19862900  | -2.79036800 | 1.85473800  |
| H  | 2.21105400  | -3.70579600 | 0.73408100  |
| H  | 3.61073100  | -1.76659700 | 0.25735000  |
| H  | 3.48675400  | -1.92168200 | 2.01180600  |
| P  | 2.37382900  | 0.10622800  | 1.11651600  |
| P  | 0.51947100  | -2.26845200 | -0.37011100 |
| C  | -1.99474200 | 1.91575100  | -0.30349800 |
| C  | -0.30195600 | 1.49321400  | -2.08977900 |
| C  | -1.07069400 | 2.63128300  | -1.42473100 |
| Cu | 0.34003400  | 0.12545600  | -0.21810600 |
| C  | 4.09661800  | 0.94196500  | 1.10601800  |
| H  | 4.79125200  | 0.12122100  | 1.32971300  |
| C  | 2.05886800  | 0.56298900  | 2.94211400  |
| H  | 1.38108100  | 1.42202600  | 2.85792300  |
| C  | 1.11028100  | -2.89209900 | -2.08966600 |
| H  | 0.89316100  | -2.04150800 | -2.74448300 |
| C  | -0.71507300 | -3.68344100 | -0.18790800 |
| H  | -0.11425300 | -4.55474800 | 0.11256500  |
| C  | 4.07610400  | 1.86729600  | 2.34303700  |
| C  | 3.40594700  | 1.08521900  | 3.47864000  |
| H  | 5.09465100  | 2.18078900  | 2.60156100  |
| H  | 3.50314500  | 2.77748700  | 2.12960300  |
| H  | 3.25754800  | 1.70074100  | 4.37436000  |
| H  | 4.05918600  | 0.25272800  | 3.76780900  |
| C  | 4.54345800  | 1.57119300  | -0.19490200 |
| C  | 5.49282200  | 0.91474800  | -0.99308400 |
| C  | 4.05581500  | 2.81254500  | -0.63308800 |

|   |              |              |              |
|---|--------------|--------------|--------------|
| C | 5. 94081000  | 1. 47414000  | -2. 19145800 |
| H | 5. 89196700  | -0. 04397400 | -0. 66912000 |
| C | 4. 50386400  | 3. 37483500  | -1. 82932800 |
| H | 3. 31685000  | 3. 34793300  | -0. 04512100 |
| C | 5. 44726600  | 2. 70885700  | -2. 61522400 |
| H | 6. 68363400  | 0. 94889200  | -2. 78681000 |
| H | 4. 10805100  | 4. 33660800  | -2. 14379200 |
| H | 5. 79685500  | 3. 15021100  | -3. 54469900 |
| C | 1. 33857000  | -0. 51060700 | 3. 73034000  |
| C | 1. 99809400  | -1. 36838000 | 4. 62272600  |
| C | -0. 04568400 | -0. 67792600 | 3. 54283300  |
| C | 1. 29730700  | -2. 36443900 | 5. 30876400  |
| H | 3. 06337000  | -1. 25949100 | 4. 80288200  |
| C | -0. 74300200 | -1. 67694800 | 4. 22179300  |
| H | -0. 57760000 | -0. 03120900 | 2. 84677300  |
| C | -0. 07358100 | -2. 52443000 | 5. 10906400  |
| H | 1. 82833800  | -3. 01259400 | 6. 00159100  |
| H | -1. 80739900 | -1. 79782500 | 4. 04703500  |
| H | -0. 61846900 | -3. 30083900 | 5. 63919700  |
| C | -1. 14895700 | -3. 92612500 | -1. 65095600 |
| C | 0. 14400700  | -4. 05084900 | -2. 46939300 |
| H | -1. 76506900 | -4. 82959000 | -1. 72684400 |
| H | -1. 76542500 | -3. 08852100 | -2. 00303300 |
| H | 0. 61224400  | -5. 01493100 | -2. 24104700 |
| H | -0. 04720600 | -4. 04378100 | -3. 54879600 |
| C | -1. 83916000 | -3. 53525900 | 0. 81488500  |
| C | -2. 56824300 | -2. 34868800 | 0. 97005800  |
| C | -2. 20106700 | -4. 65007400 | 1. 58826200  |
| C | -3. 64424300 | -2. 28564300 | 1. 85948800  |
| H | -2. 28719600 | -1. 45367300 | 0. 42373000  |
| C | -3. 27103000 | -4. 58933500 | 2. 48112100  |
| H | -1. 64039200 | -5. 57739700 | 1. 48438000  |
| C | -4. 00011400 | -3. 40542100 | 2. 61472700  |
| H | -4. 19437500 | -1. 35394100 | 1. 93981700  |
| H | -3. 53447700 | -5. 46558500 | 3. 06848800  |
| H | -4. 83842400 | -3. 35505400 | 3. 30514900  |
| C | 2. 58808300  | -3. 19442700 | -2. 21770200 |
| C | 3. 16049500  | -4. 38504300 | -1. 73782000 |
| C | 3. 44135300  | -2. 25759500 | -2. 82300600 |
| C | 4. 52999300  | -4. 62635100 | -1. 85696200 |
| H | 2. 53343600  | -5. 13997800 | -1. 27142400 |
| C | 4. 81157500  | -2. 49407300 | -2. 94283200 |
| H | 3. 02516500  | -1. 33098400 | -3. 21107800 |
| C | 5. 36341800  | -3. 68160200 | -2. 45919900 |

|   |             |             |             |
|---|-------------|-------------|-------------|
| H | 4.94495600  | -5.55785000 | -1.48072100 |
| H | 5.44329400  | -1.74977900 | -3.41999300 |
| H | 6.42875500  | -3.87233700 | -2.55557800 |
| O | -1.29975100 | 1.09966700  | 0.46180900  |
| C | 1.03485200  | 1.35175000  | -2.20552900 |
| H | 1.73576700  | 2.07084700  | -1.79702100 |
| H | 1.45645700  | 0.54926100  | -2.80628900 |
| H | -0.94800600 | 0.76634700  | -2.57909200 |
| C | -2.90178700 | 2.88932300  | 0.47321500  |
| C | -3.92916400 | 3.62749000  | -0.13210000 |
| C | -2.70036500 | 3.04894000  | 1.84875400  |
| C | -4.70358200 | 4.52190000  | 0.60800900  |
| H | -4.15890300 | 3.48051300  | -1.18089000 |
| C | -3.47149900 | 3.94211500  | 2.59247900  |
| H | -1.94712200 | 2.44000200  | 2.33421600  |
| C | -4.47256400 | 4.69175400  | 1.97368400  |
| H | -5.49743700 | 5.07821000  | 0.11529800  |
| H | -3.29464700 | 4.04489700  | 3.66062000  |
| H | -5.07544100 | 5.38862000  | 2.55060800  |
| O | -2.95275300 | 1.09139300  | -1.25969500 |
| C | -3.98222300 | 0.40326900  | -0.76877300 |
| O | -4.36601700 | 0.41237900  | 0.38927100  |
| C | -4.67316100 | -0.42268400 | -1.82435200 |
| C | -4.22014400 | -0.49685100 | -3.14901500 |
| C | -5.81623600 | -1.14137500 | -1.44944400 |
| C | -4.90025100 | -1.28091400 | -4.08190000 |
| H | -3.33990200 | 0.06415700  | -3.44312100 |
| C | -6.49658900 | -1.92172700 | -2.38202900 |
| H | -6.15153200 | -1.07192200 | -0.42024200 |
| C | -6.03931300 | -1.99417700 | -3.70071200 |
| H | -4.54362400 | -1.33229200 | -5.10757600 |
| H | -7.38308000 | -2.47439100 | -2.08197300 |
| H | -6.56944500 | -2.60292000 | -4.42886200 |
| C | -0.12413100 | 3.67431200  | -0.78464300 |
| C | 0.30568100  | 3.59299300  | 0.55190700  |
| C | 0.35222600  | 4.76144300  | -1.53865500 |
| C | 1.12664200  | 4.57261100  | 1.11560600  |
| H | -0.02810700 | 2.75847200  | 1.15281900  |
| C | 1.19192200  | 5.73156900  | -0.98574500 |
| H | 0.06367500  | 4.87162700  | -2.57742600 |
| C | 1.57697800  | 5.65074100  | 0.35209900  |
| H | 1.40487900  | 4.49503000  | 2.16449300  |
| H | 1.52829200  | 6.56108500  | -1.60308300 |
| H | 2.21209600  | 6.41514500  | 0.79234100  |

|   |             |            |             |
|---|-------------|------------|-------------|
| C | -1.89038000 | 3.29675000 | -2.56619400 |
| H | -1.24939600 | 3.52517100 | -3.42392800 |
| H | -2.67531200 | 2.62378500 | -2.91221200 |
| H | -2.34770000 | 4.23040800 | -2.23013300 |

**TS5\_a1**

|    |             |             |             |
|----|-------------|-------------|-------------|
| C  | -2.92422100 | 2.29035400  | 0.21328700  |
| C  | -3.74765200 | 1.03761300  | 0.57200100  |
| H  | -2.56213900 | 2.76754500  | 1.13158500  |
| H  | -3.58546500 | 3.01479200  | -0.28098200 |
| H  | -4.32709000 | 0.72203100  | -0.30316900 |
| H  | -4.47357300 | 1.32682400  | 1.34381200  |
| P  | -2.83189300 | -0.52373400 | 1.09448400  |
| P  | -1.38019100 | 2.11271500  | -0.82113800 |
| C  | 3.09255300  | -1.03949600 | 4.03379500  |
| C  | 3.14742200  | -1.02218800 | 2.70158200  |
| H  | 3.42519300  | -0.18312000 | 4.61501300  |
| C  | 1.96473500  | -1.46945300 | 0.55485100  |
| C  | 2.74903100  | -2.15267500 | 1.75478600  |
| Cu | 0.18155500  | 0.63875900  | -0.20736300 |
| O  | 1.07815800  | -0.64522500 | 0.98313900  |
| C  | -4.36944700 | -1.61439400 | 1.45018600  |
| H  | -5.24530800 | -0.95446100 | 1.39360800  |
| C  | -2.48276500 | -0.28382300 | 2.96998300  |
| H  | -1.65699900 | -0.98578700 | 3.14380900  |
| C  | -1.88398800 | 1.93743000  | -2.65457600 |
| H  | -1.04148900 | 1.37756500  | -3.07808100 |
| C  | -0.87385800 | 3.93341600  | -1.01328200 |
| H  | -1.76770500 | 4.51088600  | -0.74101600 |
| C  | 1.70870000  | -3.07456700 | 2.43925000  |
| H  | 1.27349800  | -3.78822600 | 1.73451500  |
| H  | 2.17307400  | -3.64487000 | 3.24953300  |
| H  | 0.89725000  | -2.46980300 | 2.84912200  |
| C  | 3.99643900  | -2.96426300 | 1.34409100  |
| C  | 3.90660600  | -4.31740900 | 0.97905300  |
| C  | 5.27811300  | -2.38772800 | 1.35654600  |
| C  | 5.03954500  | -5.05781200 | 0.63299300  |
| H  | 2.94211300  | -4.81173300 | 0.95458500  |
| C  | 6.41278300  | -3.12236100 | 1.01175400  |
| H  | 5.39564200  | -1.35210800 | 1.65316100  |
| C  | 6.30091200  | -4.46484800 | 0.64544000  |
| H  | 4.92941500  | -6.10328600 | 0.35551700  |
| H  | 7.38884900  | -2.64379800 | 1.03921700  |

|   |             |             |             |
|---|-------------|-------------|-------------|
| H | 7.18426400  | -5.04025600 | 0.38082400  |
| C | 1.56932900  | -2.35994100 | -0.62228700 |
| C | 2.48239500  | -2.91231300 | -1.53298300 |
| C | 0.20601600  | -2.64981000 | -0.77960800 |
| C | 2.03856100  | -3.72373600 | -2.57795700 |
| H | 3.53721900  | -2.68737900 | -1.43864900 |
| C | -0.23700200 | -3.46796900 | -1.82205600 |
| H | -0.50898200 | -2.21830900 | -0.08639900 |
| C | 0.67887400  | -4.00760800 | -2.72617300 |
| H | 2.76036500  | -4.13234500 | -3.28065600 |
| H | -1.29864600 | -3.67994100 | -1.92115100 |
| H | 0.33782000  | -4.64122700 | -3.54122700 |
| H | 3.52512700  | -0.13141300 | 2.20661900  |
| H | 2.72288000  | -1.88802700 | 4.60285800  |
| O | 3.31922000  | -0.56198200 | -0.18026700 |
| C | -4.21014200 | -2.05051100 | 2.92702400  |
| C | -3.71973600 | -0.82963200 | 3.70923600  |
| H | -5.15623500 | -2.44476800 | 3.31813100  |
| H | -3.47417000 | -2.86209100 | 2.99868900  |
| H | -3.48002900 | -1.07267300 | 4.75233600  |
| H | -4.52232500 | -0.08173800 | 3.73316200  |
| C | -4.58346600 | -2.75990400 | 0.48472800  |
| C | -5.79506500 | -2.88275000 | -0.20965800 |
| C | -3.60271400 | -3.74391200 | 0.27814400  |
| C | -6.02607000 | -3.95029600 | -1.08073000 |
| H | -6.56935100 | -2.13269100 | -0.06369600 |
| C | -3.82867600 | -4.81276500 | -0.58917600 |
| H | -2.64920500 | -3.67062400 | 0.79532500  |
| C | -5.04256700 | -4.92076400 | -1.27448800 |
| H | -6.97657900 | -4.02383500 | -1.60336900 |
| H | -3.05463100 | -5.56295300 | -0.72931000 |
| H | -5.21881600 | -5.75489800 | -1.94840700 |
| C | -1.98751400 | 1.09216500  | 3.35994700  |
| C | -2.83790800 | 2.09217200  | 3.85639300  |
| C | -0.62338200 | 1.39956000  | 3.20079800  |
| C | -2.34680300 | 3.36196600  | 4.17393300  |
| H | -3.89344700 | 1.88694900  | 4.00806200  |
| C | -0.13561600 | 2.66956100  | 3.50978500  |
| H | 0.05907500  | 0.63937400  | 2.82688100  |
| C | -0.99524600 | 3.65838700  | 3.99642800  |
| H | -3.02544000 | 4.11688900  | 4.56391900  |
| H | 0.91884500  | 2.88829900  | 3.36628100  |
| H | -0.61227900 | 4.64632200  | 4.23661300  |
| C | -0.66766200 | 4.09655900  | -2.53864100 |

|   |             |             |             |
|---|-------------|-------------|-------------|
| C | -1.82360900 | 3.36811300  | -3.23247000 |
| H | -0.62843100 | 5.15924100  | -2.80551700 |
| H | 0.29178000  | 3.65381500  | -2.83451000 |
| H | -2.75544900 | 3.90989100  | -3.02982600 |
| H | -1.70188700 | 3.33754800  | -4.32184300 |
| C | 0.27507200  | 4.42007600  | -0.15681900 |
| C | 1.55204600  | 3.84236100  | -0.23715800 |
| C | 0.08623600  | 5.50148500  | 0.71464700  |
| C | 2.60612400  | 4.33581800  | 0.53256900  |
| H | 1.72502800  | 2.99373200  | -0.89259800 |
| C | 1.13990600  | 5.99721000  | 1.48578300  |
| H | -0.89619300 | 5.96316000  | 0.78878800  |
| C | 2.40515600  | 5.41524100  | 1.39712900  |
| H | 3.58689300  | 3.87473500  | 0.45118300  |
| H | 0.97047000  | 6.83941500  | 2.15192500  |
| H | 3.22824600  | 5.79952700  | 1.99373600  |
| C | -3.14116700 | 1.13126900  | -2.90266500 |
| C | -4.41006700 | 1.71868200  | -3.01699900 |
| C | -3.04861300 | -0.26801600 | -2.99590300 |
| C | -5.54929800 | 0.93342600  | -3.21191100 |
| H | -4.52131200 | 2.79740900  | -2.95992600 |
| C | -4.18517300 | -1.05451400 | -3.18027800 |
| H | -2.07497000 | -0.74525200 | -2.91002700 |
| C | -5.44267900 | -0.45545600 | -3.28939600 |
| H | -6.52088600 | 1.41242300  | -3.30377900 |
| H | -4.09079900 | -2.13531200 | -3.23140900 |
| H | -6.32865700 | -1.06715900 | -3.43468700 |
| C | 3.08083600  | 0.32043400  | -1.09444300 |
| O | 1.95256800  | 0.69103000  | -1.49154300 |
| C | 4.31201400  | 0.92968500  | -1.71503000 |
| C | 4.17322600  | 1.94284000  | -2.67388300 |
| C | 5.59525600  | 0.48940200  | -1.36065100 |
| C | 5.29977400  | 2.51777200  | -3.25999200 |
| H | 3.17537800  | 2.26241300  | -2.95436900 |
| C | 6.72107700  | 1.06392300  | -1.94973800 |
| H | 5.69676900  | -0.30851100 | -0.63362500 |
| C | 6.57647100  | 2.08069200  | -2.89719000 |
| H | 5.18315000  | 3.30417500  | -4.00116200 |
| H | 7.71274100  | 0.71636400  | -1.67194300 |
| H | 7.45536500  | 2.52776500  | -3.35476400 |

**(R)-3da**

|   |            |            |            |
|---|------------|------------|------------|
| C | 2.26937700 | 3.18272200 | 0.41529500 |
|---|------------|------------|------------|



|   |              |              |              |
|---|--------------|--------------|--------------|
| C | 1. 64664600  | 2. 22172800  | -0. 26561600 |
| H | 2. 90905400  | 3. 89586400  | -0. 09738600 |
| C | -0. 59079800 | 1. 15623600  | -0. 50247900 |
| C | 0. 74903300  | 1. 12380200  | 0. 30058600  |
| O | -0. 73051300 | 1. 96669200  | -1. 40591900 |
| C | 0. 42698500  | 1. 37293700  | 1. 78840800  |
| H | -0. 17239400 | 0. 56883400  | 2. 21948000  |
| H | 1. 34385300  | 1. 46714300  | 2. 37702800  |
| H | -0. 13179200 | 2. 30788300  | 1. 89674600  |
| C | 1. 47952600  | -0. 21204700 | 0. 04187500  |
| C | 2. 12224100  | -0. 92861400 | 1. 06054200  |
| C | 1. 55862200  | -0. 71073900 | -1. 26886200 |
| C | 2. 81400200  | -2. 10909500 | 0. 77977900  |
| H | 2. 08877000  | -0. 57242000 | 2. 08484200  |
| C | 2. 24783100  | -1. 88939200 | -1. 55039800 |
| H | 1. 07203500  | -0. 17292000 | -2. 07866800 |
| C | 2. 87953200  | -2. 59582300 | -0. 52549400 |
| H | 3. 30378900  | -2. 64669700 | 1. 58769000  |
| H | 2. 28928200  | -2. 25573600 | -2. 57278000 |
| H | 3. 41691300  | -3. 51499600 | -0. 74224700 |
| C | -1. 73885800 | 0. 24429700  | -0. 15566900 |
| C | -1. 62098600 | -0. 95299000 | 0. 56888800  |
| C | -3. 00835600 | 0. 63037800  | -0. 62003600 |
| C | -2. 74609800 | -1. 73689500 | 0. 82508000  |
| H | -0. 65127200 | -1. 29449700 | 0. 91072200  |
| C | -4. 13139600 | -0. 14639500 | -0. 35289700 |
| H | -3. 08854500 | 1. 54911000  | -1. 19124300 |
| C | -4. 00303300 | -1. 33457500 | 0. 37138400  |
| H | -2. 63743600 | -2. 66634500 | 1. 37737900  |
| H | -5. 10682500 | 0. 17147000  | -0. 71123400 |
| H | -4. 87804800 | -1. 94542600 | 0. 57752500  |
| H | 1. 78536900  | 2. 16926700  | -1. 34211000 |
| H | 2. 17572500  | 3. 31272000  | 1. 48929200  |

**(S)-3da**

|   |              |              |              |
|---|--------------|--------------|--------------|
| C | 2. 87112200  | -2. 38234700 | -0. 10461200 |
| C | 1. 56296700  | -2. 36617800 | 0. 14557300  |
| H | 3. 39051300  | -3. 32186900 | -0. 27350800 |
| C | -0. 61248300 | -1. 25082600 | -0. 34566300 |
| C | 0. 71048600  | -1. 14399600 | 0. 47955500  |
| O | -0. 74050300 | -2. 15569100 | -1. 15700200 |
| C | -1. 76063600 | -0. 29923600 | -0. 12841600 |
| C | -1. 66052100 | 0. 94886600  | 0. 50749300  |

|   |             |             |             |
|---|-------------|-------------|-------------|
| C | -3.01224800 | -0.70518900 | -0.62402400 |
| C | -2.78491000 | 1.76263700  | 0.64738800  |
| H | -0.70379700 | 1.30447800  | 0.86977800  |
| C | -4.13483700 | 0.10281800  | -0.47447000 |
| H | -3.07829100 | -1.66452400 | -1.12596500 |
| C | -4.02398800 | 1.34156000  | 0.16291200  |
| H | -2.68931800 | 2.73031500  | 1.13238400  |
| H | -5.09610500 | -0.23022200 | -0.85650700 |
| H | -4.89841000 | 1.97683300  | 0.27749200  |
| H | 1.01506300  | -3.30538100 | 0.17249400  |
| H | 3.47001200  | -1.47810400 | -0.15886600 |
| C | 1.44231600  | 0.15620500  | 0.12004200  |
| C | 1.99971600  | 1.00642700  | 1.08399400  |
| C | 1.59657100  | 0.49863900  | -1.23365000 |
| C | 2.67818700  | 2.16969100  | 0.70899000  |
| H | 1.90803100  | 0.76996200  | 2.13908300  |
| C | 2.26947300  | 1.65946100  | -1.60957800 |
| H | 1.19036200  | -0.15843100 | -1.99795500 |
| C | 2.81269400  | 2.50313200  | -0.63788900 |
| H | 3.10187700  | 2.81302000  | 1.47590200  |
| H | 2.37060900  | 1.90426600  | -2.66363700 |
| H | 3.33762800  | 3.40890200  | -0.92913000 |
| C | 0.34934900  | -1.26303700 | 1.98631500  |
| H | -0.21436400 | -2.18630400 | 2.15874000  |
| H | 1.26040700  | -1.32064500 | 2.58900100  |
| H | -0.25972600 | -0.42852100 | 2.34296100  |

**L\*CuOBz**

|    |             |             |             |
|----|-------------|-------------|-------------|
| C  | 0.41180700  | -2.62314500 | 0.38867800  |
| C  | 1.49743500  | -1.85278200 | 1.17215000  |
| H  | -0.45577300 | -2.79585400 | 1.03675900  |
| H  | 0.79813600  | -3.60662000 | 0.09341400  |
| H  | 2.44606200  | -1.89200500 | 0.62425100  |
| H  | 1.66078200  | -2.33896800 | 2.14173500  |
| P  | 1.13332300  | -0.02521400 | 1.38306800  |
| P  | -0.28651300 | -1.71777900 | -1.10080100 |
| Cu | -0.29656500 | 0.48739900  | -0.43222200 |
| C  | 2.78400800  | 0.64554400  | 2.02748700  |
| H  | 3.38878300  | -0.23252700 | 2.29236200  |
| C  | 0.25045900  | 0.20313600  | 3.05173900  |
| H  | -0.29894000 | 1.14002300  | 2.89508300  |
| C  | 0.79727900  | -2.18092100 | -2.60044500 |
| H  | 0.64969400  | -1.32866900 | -3.27579900 |

|   |              |              |              |
|---|--------------|--------------|--------------|
| C | -1. 70195700 | -2. 87197200 | -1. 61726100 |
| H | -1. 55127600 | -3. 80071900 | -1. 05092400 |
| C | 2. 40662700  | 1. 36033400  | 3. 35227800  |
| C | 1. 37184800  | 0. 48328300  | 4. 06961700  |
| H | 3. 30150000  | 1. 53363800  | 3. 96162100  |
| H | 1. 97520700  | 2. 34447200  | 3. 12745800  |
| H | 0. 97469700  | 0. 96544700  | 4. 97142600  |
| H | 1. 85340000  | -0. 45034400 | 4. 38795200  |
| C | 3. 58510400  | 1. 49657800  | 1. 05957800  |
| C | 4. 98476400  | 1. 39742300  | 1. 06264600  |
| C | 2. 98343400  | 2. 41239500  | 0. 18149900  |
| C | 5. 76677800  | 2. 19026800  | 0. 22067100  |
| H | 5. 46748500  | 0. 68919300  | 1. 73341300  |
| C | 3. 76460900  | 3. 20309700  | -0. 66373400 |
| H | 1. 90138100  | 2. 49427100  | 0. 12125600  |
| C | 5. 15714800  | 3. 09801100  | -0. 64782100 |
| H | 6. 84970100  | 2. 09635400  | 0. 24274800  |
| H | 3. 27562500  | 3. 89747500  | -1. 34157700 |
| H | 5. 76122900  | 3. 71466800  | -1. 30822400 |
| C | -0. 76964800 | -0. 87197300 | 3. 35384600  |
| C | -0. 49794300 | -1. 97458700 | 4. 17656900  |
| C | -2. 03785600 | -0. 78362200 | 2. 75107700  |
| C | -1. 46340200 | -2. 96297100 | 4. 38932700  |
| H | 0. 46599900  | -2. 06561800 | 4. 66920500  |
| C | -2. 99771400 | -1. 77443600 | 2. 95626900  |
| H | -2. 26478900 | 0. 06724500  | 2. 11164000  |
| C | -2. 71400000 | -2. 86950300 | 3. 77789700  |
| H | -1. 23470000 | -3. 80508100 | 5. 03786500  |
| H | -3. 96586000 | -1. 68957700 | 2. 47073700  |
| H | -3. 46328300 | -3. 63898600 | 3. 94452200  |
| C | -1. 40702000 | -3. 18276500 | -3. 10617200 |
| C | 0. 10523500  | -3. 40216800 | -3. 23890300 |
| H | -1. 98372800 | -4. 05489800 | -3. 43589200 |
| H | -1. 72202800 | -2. 33620000 | -3. 73017700 |
| H | 0. 37814400  | -4. 32491500 | -2. 71167700 |
| H | 0. 41611900  | -3. 52598800 | -4. 28350000 |
| C | -3. 10090400 | -2. 36722200 | -1. 33366400 |
| C | -3. 53059600 | -1. 10004100 | -1. 75746200 |
| C | -4. 01270200 | -3. 18632000 | -0. 65314300 |
| C | -4. 83318300 | -0. 66856800 | -1. 50931600 |
| H | -2. 83699500 | -0. 43446500 | -2. 26404900 |
| C | -5. 31871400 | -2. 75831200 | -0. 40504000 |
| H | -3. 69644800 | -4. 17072800 | -0. 31423800 |
| C | -5. 73294500 | -1. 49603400 | -0. 83275000 |

|   |             |             |             |
|---|-------------|-------------|-------------|
| H | -5.14044500 | 0.32102500  | -1.83573900 |
| H | -6.00959900 | -3.41155600 | 0.12198000  |
| H | -6.74685000 | -1.15700700 | -0.63782800 |
| C | 2.27659500  | -2.26693300 | -2.29358200 |
| C | 2.93019700  | -3.47645800 | -2.01525400 |
| C | 3.03080500  | -1.08125400 | -2.24777500 |
| C | 4.29094700  | -3.49889100 | -1.69694600 |
| H | 2.38471300  | -4.41467700 | -2.05398300 |
| C | 4.38653900  | -1.09953600 | -1.92196700 |
| H | 2.54434500  | -0.13150400 | -2.45896400 |
| C | 5.02325000  | -2.31244200 | -1.64465400 |
| H | 4.77714600  | -4.44940400 | -1.49213100 |
| H | 4.94015000  | -0.16602200 | -1.87998800 |
| H | 6.08073300  | -2.33189200 | -1.39526100 |
| O | -0.33110800 | 2.42716300  | -1.31944500 |
| C | -1.36159100 | 2.71075900  | -0.62435400 |
| O | -1.88152000 | 1.87182000  | 0.17442900  |
| C | -1.97192300 | 4.07706100  | -0.75513400 |
| C | -3.09654400 | 4.42282700  | 0.00591800  |
| C | -1.42283400 | 5.01632600  | -1.63825900 |
| C | -3.66404200 | 5.69095300  | -0.11431200 |
| H | -3.51008400 | 3.68385900  | 0.68421100  |
| C | -1.99106900 | 6.28410000  | -1.75889400 |
| H | -0.55250500 | 4.73300000  | -2.22070100 |
| C | -3.11256600 | 6.62377300  | -0.99708700 |
| H | -4.53635800 | 5.95340400  | 0.47922000  |
| H | -1.56089100 | 7.00823000  | -2.44639100 |
| H | -3.55550500 | 7.61232300  | -1.09115200 |

**Table S3.** Electronic energies ( $E_{elec}$ ), Gibbs free energies ( $G_{298}$ ), thermal correction to Gibbs free energy ( $cor G_{gas}$ ), solvation energies ( $E_{sol}$ ), solvation free energies ( $G_{sol}$ ) in THF ( $\epsilon = 7.43$ ) for all stationary points of the process. Calculations were carried out at M06/6-311+G(d,p)/SDD/SMD(THF)//B3LYP-D3(BJ)/6-31G(d)/LANL2DZ level.

| species       | $E_{elec}$<br>(a.u.) | $G_{298}$<br>(a.u.) | $cor G_{gas}$<br>(a.u.) | $E_{sol}$<br>(a.u.) | $G_{sol}$<br>(a.u.) |
|---------------|----------------------|---------------------|-------------------------|---------------------|---------------------|
| <b>Int2_a</b> | -2584.127187         | -2583.410408        | 0.716779                | -2584.240175        | -2583.523396        |
| <b>Int2_b</b> | -2584.125186         | -2583.408679        | 0.716507                | -2584.237671        | -2583.521164        |
| <b>2a</b>     | -765.263319          | -765.099996         | 0.163323                | -764.905268         | -764.741945         |
| <b>TS3_a1</b> | -3349.415896         | -3348.505222        | 0.910674                | -3349.151948        | -3348.241274        |
| <b>TS3_a2</b> | -3349.405920         | -3348.498114        | 0.907806                | -3349.139733        | -3348.231927        |
| <b>TS3_a3</b> | -3349.408636         | -3348.500960        | 0.907676                | -3349.146704        | -3348.239028        |
| <b>TS3_a4</b> | -3349.407251         | -3348.499824        | 0.907426                | -3349.141667        | -3348.234241        |
| <b>TS3_b1</b> | -3349.415803         | -3348.504335        | 0.911468                | -3349.148831        | -3348.237363        |
| <b>TS3_b2</b> | -3349.406466         | -3348.494698        | 0.911768                | -3349.134708        | -3348.222940        |
| <b>TS3_b3</b> | -3349.396229         | -3348.485750        | 0.910478                | -3349.126236        | -3348.215758        |
| <b>TS3_b4</b> | -3349.402603         | -3348.491282        | 0.911322                | -3349.139242        | -3348.227920        |

### Cartesian coordinates for the optimized structures in Table S3

#### Int2\_a

|    |             |             |             |
|----|-------------|-------------|-------------|
| C  | -0.99171300 | 1.03866100  | 1.94087500  |
| C  | 0.27032000  | 1.88864900  | 1.71424600  |
| Cu | -0.07087600 | 0.31520100  | -1.32372900 |
| C  | -0.18911500 | 3.62428000  | -0.66291900 |
| H  | -0.16965800 | 3.54114700  | -1.75679500 |
| C  | 2.38675700  | 3.00545500  | 0.08632900  |
| H  | 2.51823300  | 3.18739500  | 1.16009600  |
| C  | -2.85358900 | -1.07702200 | 1.22449400  |
| H  | -3.13409300 | -0.57954900 | 2.16175900  |
| C  | -0.20982500 | -1.80392500 | 1.41145100  |
| H  | -0.00753500 | -2.42385000 | 0.53451400  |
| P  | 0.74724900  | 2.09096000  | -0.07859300 |
| P  | -1.19024200 | -0.35082000 | 0.71169500  |
| C  | -0.07940300 | -0.69381200 | -3.08562100 |
| H  | 0.76231100  | -0.40829900 | -3.71986100 |
| H  | -1.03691700 | -0.50410600 | -3.57886300 |
| C  | 0.00391700  | -1.99223000 | -2.43819300 |
| C  | 1.10701600  | -2.73564500 | -2.10723300 |
| H  | -0.95062800 | -2.36065000 | -2.06123300 |

|   |             |             |             |
|---|-------------|-------------|-------------|
| C | 2.48341600  | -2.30223300 | -2.55477200 |
| H | 3.14507700  | -3.16267100 | -2.70752000 |
| H | 2.42429300  | -1.75637300 | -3.50213800 |
| H | 2.98790800  | -1.63270100 | -1.84035600 |
| C | 0.98806000  | -3.87648700 | -1.18994100 |
| C | 2.07617900  | -4.26801900 | -0.37878900 |
| C | -0.22252100 | -4.58826500 | -1.00782500 |
| C | 1.94823700  | -5.26269400 | 0.58904700  |
| H | 3.02576200  | -3.75302700 | -0.47799700 |
| C | -0.34977000 | -5.57884600 | -0.03956000 |
| H | -1.07096200 | -4.36866800 | -1.64873700 |
| C | 0.73244800  | -5.92078600 | 0.77870600  |
| H | 2.80569400  | -5.51544900 | 1.20790900  |
| H | -1.29798100 | -6.10070200 | 0.06700400  |
| H | 0.63288600  | -6.69597400 | 1.53309400  |
| C | -1.19256700 | -2.58177600 | 2.29758800  |
| C | -2.53284500 | -2.55685600 | 1.55326400  |
| H | -0.83277900 | -3.60316000 | 2.46121900  |
| H | -1.31106700 | -2.10415600 | 3.27891600  |
| H | -3.34801800 | -3.00559500 | 2.13212000  |
| H | -2.44011800 | -3.12917400 | 0.62209800  |
| C | 2.14067600  | 4.37491400  | -0.59755100 |
| C | 0.70572200  | 4.80729300  | -0.26802100 |
| C | 1.11147300  | -1.34949800 | 1.96727800  |
| C | 1.32288500  | -1.07294900 | 3.32254900  |
| C | 2.15503600  | -1.09823100 | 1.06236400  |
| C | 2.53880300  | -0.53642300 | 3.75745100  |
| H | 0.53784200  | -1.26915700 | 4.04647600  |
| C | 3.36825800  | -0.56755800 | 1.49100700  |
| H | 1.99852500  | -1.31774300 | 0.01237200  |
| C | 3.56098100  | -0.27403400 | 2.84405100  |
| H | 2.68401100  | -0.32396400 | 4.81342500  |
| H | 4.15782300  | -0.38016300 | 0.77175400  |
| H | 4.50398800  | 0.14690200  | 3.18135900  |
| C | -3.96488200 | -0.87370100 | 0.22462800  |
| C | -5.23735000 | -0.48804000 | 0.66248200  |
| C | -3.75988500 | -1.06409200 | -1.14918800 |
| C | -6.28046000 | -0.29170500 | -0.24383700 |
| H | -5.40769300 | -0.32976400 | 1.72477100  |
| C | -4.79813200 | -0.86805600 | -2.05849800 |
| H | -2.77252600 | -1.33115400 | -1.51214800 |
| C | -6.06316000 | -0.47874100 | -1.60996400 |
| H | -7.25925900 | 0.01294900  | 0.11653000  |
| H | -4.61574300 | -1.01184800 | -3.11987500 |

|   |             |             |             |
|---|-------------|-------------|-------------|
| H | -6.87040700 | -0.32077900 | -2.31943500 |
| C | -1.62581700 | 3.57213900  | -0.21160100 |
| C | -2.50116500 | 2.69588500  | -0.87501800 |
| C | -2.09999500 | 4.26890100  | 0.90515400  |
| C | -3.80342600 | 2.49993500  | -0.42354100 |
| H | -2.14316200 | 2.14058400  | -1.73944700 |
| C | -3.40786800 | 4.07592900  | 1.36098100  |
| H | -1.45029800 | 4.96129900  | 1.43128700  |
| C | -4.25906100 | 3.18586300  | 0.70570500  |
| H | -4.45533700 | 1.80693900  | -0.94330100 |
| H | -3.75712400 | 4.62261500  | 2.23280800  |
| H | -5.27127300 | 3.02645200  | 1.06562800  |
| C | 3.59882200  | 2.25734200  | -0.41689800 |
| C | 3.55688400  | 1.46694700  | -1.57318000 |
| C | 4.80630700  | 2.35295600  | 0.28568000  |
| C | 4.69133300  | 0.77978400  | -2.00542600 |
| H | 2.62317600  | 1.35272100  | -2.11653700 |
| C | 5.94463700  | 1.67205800  | -0.14669100 |
| H | 4.84848700  | 2.95492600  | 1.19045300  |
| C | 5.88901000  | 0.87776200  | -1.29341300 |
| H | 4.63294000  | 0.15677400  | -2.89296900 |
| H | 6.86973400  | 1.75328500  | 0.41735200  |
| H | 6.76932400  | 0.33624100  | -1.62747700 |
| H | 2.88720100  | 5.10642200  | -0.26894800 |
| H | 2.25477200  | 4.26248600  | -1.68317800 |
| H | 0.62747500  | 5.01203100  | 0.80718300  |
| H | 0.41558600  | 5.72358100  | -0.79546100 |
| H | 1.13424300  | 1.40381800  | 2.17983000  |
| H | 0.15140300  | 2.87132600  | 2.18625200  |
| H | -0.99689300 | 0.65081600  | 2.96607700  |
| H | -1.88669100 | 1.65626100  | 1.81567500  |

### Int2\_b

|    |             |             |             |
|----|-------------|-------------|-------------|
| C  | 0.39762200  | -1.75011000 | -1.68953500 |
| C  | 1.73529800  | -1.89582500 | -0.94565600 |
| H  | -0.29614100 | -2.52901000 | -1.35601300 |
| H  | 0.56212100  | -1.90096500 | -2.76313300 |
| H  | 1.99518400  | -2.95630200 | -0.84121800 |
| H  | 2.53472900  | -1.41725800 | -1.52039000 |
| Cu | 0.65560900  | 0.90041800  | 0.70927300  |
| C  | 1.10574100  | -2.29291500 | 1.95600400  |
| H  | 0.82899000  | -1.66923700 | 2.81543700  |
| C  | 3.59464000  | -1.36614000 | 1.21332200  |

|   |             |             |             |
|---|-------------|-------------|-------------|
| H | 4.01283400  | -2.02215700 | 0.43972600  |
| C | -2.04235800 | -0.50216800 | -2.49995100 |
| H | -1.79307800 | -1.40338600 | -3.07476200 |
| C | 0.19998400  | 1.08644300  | -2.63360800 |
| H | -0.05222000 | 2.05511800  | -2.18750200 |
| P | 1.80428700  | -1.06010000 | 0.71007200  |
| P | -0.53722900 | -0.15425500 | -1.38726900 |
| C | 0.15325900  | 2.76440500  | 1.24506300  |
| H | 1.07175500  | 3.35852800  | 1.16894000  |
| H | -0.16844300 | 2.72557900  | 2.29031900  |
| C | -0.86383600 | 3.24673500  | 0.31134900  |
| C | -2.22928500 | 3.22903300  | 0.34415800  |
| H | -0.44588900 | 3.70899900  | -0.58783100 |
| C | -2.99312900 | 3.89576400  | -0.78357600 |
| H | -3.78467200 | 3.24853800  | -1.18782600 |
| H | -3.48439200 | 4.82876900  | -0.47068400 |
| H | -2.31737400 | 4.15456800  | -1.60595800 |
| C | -3.03204500 | 2.62834200  | 1.42409200  |
| C | -2.55978700 | 1.55171200  | 2.20663700  |
| C | -4.35450600 | 3.05684400  | 1.66987200  |
| C | -3.35516700 | 0.94711400  | 3.17536900  |
| H | -1.56901700 | 1.16006600  | 2.01393000  |
| C | -5.14409100 | 2.46622700  | 2.65594300  |
| H | -4.77000900 | 3.86986200  | 1.08400400  |
| C | -4.65270700 | 1.40457700  | 3.41792300  |
| H | -2.96027700 | 0.10591400  | 3.74083000  |
| H | -6.15284800 | 2.83559800  | 2.82436900  |
| H | -5.27030800 | 0.93899500  | 4.18081900  |
| C | -2.06965000 | 0.68758200  | -3.48365700 |
| C | -0.62380400 | 0.93626500  | -3.92143000 |
| C | 3.48992700  | -2.18604200 | 2.52356500  |
| C | 2.30912700  | -3.15251100 | 2.37042800  |
| C | 4.45869100  | -0.13215500 | 1.30498200  |
| C | 5.73158900  | -0.13026500 | 0.72315400  |
| C | 4.02205200  | 1.02447800  | 1.96577100  |
| C | 6.54996400  | 0.99814900  | 0.78926500  |
| H | 6.07825300  | -1.01888500 | 0.20113900  |
| C | 4.83374900  | 2.15637400  | 2.02901000  |
| H | 3.02827300  | 1.05498800  | 2.40327600  |
| C | 6.10053700  | 2.14865600  | 1.43929600  |
| H | 7.53291700  | 0.98073400  | 0.32664400  |
| H | 4.47115900  | 3.04806100  | 2.53244300  |
| H | 6.73019500  | 3.03254900  | 1.48543000  |
| C | -0.14315900 | -2.95377400 | 1.43292400  |



|   |             |             |             |
|---|-------------|-------------|-------------|
| C | -1.34315200 | -2.22447200 | 1.44844800  |
| C | -0.14121200 | -4.22569300 | 0.85011500  |
| C | -2.50569100 | -2.74065600 | 0.88388300  |
| H | -1.35822900 | -1.22973200 | 1.88537100  |
| C | -1.30773000 | -4.74875000 | 0.28370000  |
| H | 0.76956500  | -4.81604300 | 0.83221700  |
| C | -2.48868400 | -4.00704200 | 0.29294100  |
| H | -3.41605600 | -2.15220700 | 0.89194400  |
| H | -1.28788300 | -5.73788700 | -0.16602100 |
| H | -3.39302000 | -4.40412000 | -0.15735700 |
| C | 1.70005400  | 0.98033300  | -2.71362800 |
| C | 2.35660700  | 0.17660900  | -3.65454800 |
| C | 2.47726600  | 1.63354600  | -1.74252300 |
| C | 3.74254700  | 0.00321900  | -3.60335900 |
| H | 1.78858200  | -0.32810300 | -4.42940900 |
| C | 3.85751900  | 1.45608400  | -1.68168100 |
| H | 1.98676600  | 2.27486900  | -1.01474800 |
| C | 4.49590900  | 0.62981100  | -2.60960800 |
| H | 4.23083300  | -0.62801500 | -4.34116800 |
| H | 4.43080400  | 1.95427000  | -0.90748100 |
| H | 5.57099200  | 0.48457800  | -2.55907900 |
| C | -3.33410000 | -0.74562600 | -1.76558600 |
| C | -3.78398100 | 0.15432500  | -0.79269400 |
| C | -4.10850700 | -1.87688100 | -2.04584000 |
| C | -4.97537300 | -0.07179800 | -0.10574600 |
| H | -3.17960300 | 1.01987400  | -0.54864900 |
| C | -5.30564900 | -2.10762300 | -1.36551100 |
| H | -3.76483900 | -2.58721100 | -2.79433600 |
| C | -5.73985600 | -1.20708000 | -0.39075100 |
| H | -5.28966900 | 0.63118900  | 0.65809900  |
| H | -5.89457300 | -2.99242000 | -1.59310300 |
| H | -6.66643600 | -1.38954800 | 0.14663800  |
| H | -2.46691600 | 1.57537300  | -2.97597200 |
| H | -2.73396900 | 0.47196900  | -4.32835600 |
| H | -0.52510600 | 1.82374200  | -4.55786500 |
| H | -0.27703700 | 0.07730800  | -4.50897700 |
| H | 4.43409800  | -2.70271800 | 2.72753500  |
| H | 3.30644800  | -1.50466900 | 3.36390500  |
| H | 2.10300500  | -3.70883800 | 3.29206900  |
| H | 2.54419700  | -3.88870100 | 1.59183800  |

**2a**

|   |             |            |             |
|---|-------------|------------|-------------|
| C | -4.77263700 | 0.00799100 | -0.33294600 |
|---|-------------|------------|-------------|

|   |             |             |             |
|---|-------------|-------------|-------------|
| C | -3.59330400 | -0.69512400 | -0.55480700 |
| C | -2.37014800 | -0.16740200 | -0.11823300 |
| C | -2.33599500 | 1.06783600  | 0.54259300  |
| C | -3.52001600 | 1.76772000  | 0.76264200  |
| C | -4.73675400 | 1.24028500  | 0.32534600  |
| H | -5.71967000 | -0.40180200 | -0.67113600 |
| H | -3.59450600 | -1.65410400 | -1.06152200 |
| H | -1.38768200 | 1.46842600  | 0.88103600  |
| H | -3.49441200 | 2.72414800  | 1.27636900  |
| H | -5.65819100 | 1.78905600  | 0.49863300  |
| C | -1.14777100 | -0.96413400 | -0.37798000 |
| O | -1.11288700 | -2.04746400 | -0.90083500 |
| O | -0.00000100 | -0.27192700 | -0.00011600 |
| C | 1.14771800  | -0.96415000 | 0.37783300  |
| O | 1.11278000  | -2.04748600 | 0.90068100  |
| C | 2.37014200  | -0.16744700 | 0.11817700  |
| C | 2.33610800  | 1.06766000  | -0.54290100 |
| C | 3.59321400  | -0.69504800 | 0.55513100  |
| C | 3.52016000  | 1.76753300  | -0.76282200 |
| H | 1.38786100  | 1.46816500  | -0.88163200 |
| C | 4.77257900  | 0.00804800  | 0.33338700  |
| H | 3.59432400  | -1.65392300 | 1.06204400  |
| C | 4.73681500  | 1.24021100  | -0.32515600 |
| H | 3.49464600  | 2.72386000  | -1.27673800 |
| H | 5.71954700  | -0.40165800 | 0.67186800  |
| H | 5.65827700  | 1.78897000  | -0.49835100 |

### TS3\_a1

|    |             |             |             |
|----|-------------|-------------|-------------|
| C  | -3.17048200 | -1.62929900 | 0.60536800  |
| C  | -3.77207200 | -0.26358400 | 0.24453900  |
| H  | -3.26558700 | -2.31173300 | -0.24690900 |
| H  | -3.72235200 | -2.07194300 | 1.44277600  |
| H  | -3.84268500 | 0.36762100  | 1.13524500  |
| H  | -4.78740500 | -0.39495600 | -0.14421600 |
| P  | -2.72065700 | 0.70205300  | -0.94931300 |
| P  | -1.34085100 | -1.57111100 | 0.99135100  |
| C  | 0.42523400  | -0.81034500 | -2.36820800 |
| C  | 1.74243700  | -0.61124900 | -1.99783500 |
| H  | 0.00827300  | -1.80553700 | -2.24546200 |
| C  | 2.00545100  | 1.44204300  | -0.10419600 |
| C  | 2.53431600  | 0.55117700  | -2.20330800 |
| Cu | -0.49384200 | -0.02947900 | -0.51203700 |
| O  | 0.75677800  | 1.51370700  | -0.14089400 |

|   |             |             |             |
|---|-------------|-------------|-------------|
| C | -3.62432100 | 2.35361200  | -0.97791400 |
| H | -4.62434500 | 2.15861000  | -0.56749800 |
| C | -3.30593000 | 0.22745700  | -2.69873600 |
| C | -1.26068400 | -1.22130100 | 2.84055800  |
| H | -0.23143000 | -0.88497600 | 2.99883000  |
| C | -0.96566900 | -3.41611800 | 1.19594000  |
| C | 1.90527700  | 1.63677300  | -3.04475800 |
| H | 2.45637200  | 2.57740200  | -3.00922100 |
| H | 1.82518100  | 1.33764900  | -4.10033200 |
| H | 0.89243500  | 1.84439700  | -2.68012400 |
| C | 4.00269100  | 0.43241900  | -2.14753300 |
| C | 4.84469400  | 1.52341500  | -2.45276800 |
| C | 4.65345300  | -0.76457200 | -1.76218300 |
| C | 6.23217600  | 1.43646400  | -2.35046700 |
| H | 4.41307200  | 2.46860200  | -2.75809300 |
| C | 6.03723600  | -0.84741800 | -1.64718600 |
| H | 4.07084000  | -1.65810400 | -1.57185800 |
| C | 6.84543400  | 0.25585400  | -1.93618800 |
| H | 6.83415200  | 2.30999700  | -2.58777000 |
| H | 6.48997200  | -1.79028700 | -1.34803300 |
| H | 7.92646000  | 0.18903000  | -1.85343700 |
| C | 2.86339700  | 2.63513900  | -0.14623400 |
| C | 4.20069000  | 2.61012500  | 0.27558500  |
| C | 2.32466800  | 3.83581300  | -0.64243500 |
| C | 4.97531900  | 3.76793000  | 0.22075200  |
| H | 4.63015100  | 1.68389300  | 0.63642500  |
| C | 3.10628700  | 4.98381100  | -0.70794500 |
| H | 1.29354000  | 3.84857700  | -0.97388600 |
| C | 4.43585200  | 4.95579600  | -0.27189700 |
| H | 6.00961900  | 3.73349200  | 0.55070300  |
| H | 2.67800800  | 5.90519800  | -1.09317600 |
| H | 5.04430500  | 5.85462700  | -0.31889000 |
| H | 2.17643400  | -1.41435500 | -1.41247300 |
| H | -0.05020700 | -0.17303200 | -3.11010200 |
| C | 2.26693400  | 0.09792100  | 1.87507600  |
| O | 2.61653900  | 0.34545400  | 0.59315100  |
| O | 1.48386400  | 0.75828000  | 2.52930400  |
| C | 2.96164400  | -1.11372500 | 2.39601600  |
| C | 3.99128100  | -1.74109500 | 1.68174200  |
| C | 2.55388400  | -1.62857300 | 3.63323700  |
| C | 4.58577100  | -2.89292100 | 2.19398800  |
| H | 4.31201900  | -1.32714400 | 0.73371400  |
| C | 3.14087700  | -2.78882100 | 4.13368700  |
| H | 1.77846600  | -1.10789300 | 4.18481000  |

|   |              |              |              |
|---|--------------|--------------|--------------|
| C | 4. 15355100  | -3. 42572700 | 3. 41110800  |
| H | 5. 38477900  | -3. 37783800 | 1. 64039600  |
| H | 2. 81333400  | -3. 19452400 | 5. 08644600  |
| H | 4. 61057100  | -4. 33100800 | 3. 80056400  |
| C | -1. 44004900 | -2. 59502700 | 3. 50218300  |
| H | -1. 13855700 | -2. 57142800 | 4. 55633300  |
| H | -2. 49190900 | -2. 90539900 | 3. 47535500  |
| C | -0. 59378200 | -3. 58371000 | 2. 68730500  |
| H | 0. 46430400  | -3. 35112700 | 2. 84012700  |
| H | -0. 74427600 | -4. 62129400 | 3. 00589400  |
| H | -1. 91634900 | -3. 93234900 | 1. 01661100  |
| C | -2. 18198900 | -0. 08459300 | 3. 20069300  |
| C | -1. 78963400 | 1. 22067000  | 2. 85585500  |
| C | -3. 44997200 | -0. 28238400 | 3. 75953500  |
| C | -2. 65638900 | 2. 29434200  | 3. 04511100  |
| H | -0. 80570000 | 1. 38359000  | 2. 42570800  |
| C | -4. 31884500 | 0. 79603400  | 3. 94963800  |
| H | -3. 77154300 | -1. 27965600 | 4. 04372800  |
| C | -3. 92881000 | 2. 08468000  | 3. 58426600  |
| H | -2. 34130000 | 3. 29221500  | 2. 76240600  |
| H | -5. 30121600 | 0. 62402700  | 4. 38186000  |
| H | -4. 60587500 | 2. 92317400  | 3. 72127700  |
| C | -3. 80028500 | 2. 64334600  | -2. 48483500 |
| H | -4. 50171400 | 3. 47084900  | -2. 63969900 |
| H | -2. 83786000 | 2. 95017400  | -2. 91531600 |
| C | -4. 28433300 | 1. 33906500  | -3. 12762000 |
| H | -2. 39717100 | 0. 32772900  | -3. 30297400 |
| H | -5. 29592200 | 1. 12245400  | -2. 76474000 |
| H | -4. 34198500 | 1. 40558300  | -4. 22015800 |
| C | -3. 00000600 | 3. 47592200  | -0. 18249500 |
| C | -3. 83583400 | 4. 40092000  | 0. 45711700  |
| C | -1. 61284500 | 3. 63423500  | -0. 07112000 |
| C | -3. 30387600 | 5. 46275700  | 1. 18858100  |
| H | -4. 91472900 | 4. 28043200  | 0. 38770300  |
| C | -1. 07769100 | 4. 68902000  | 0. 66970300  |
| H | -0. 94036400 | 2. 90934800  | -0. 51486000 |
| C | -1. 91930300 | 5. 60867000  | 1. 29890600  |
| H | -3. 96901700 | 6. 16733000  | 1. 68061100  |
| H | 0. 00027800  | 4. 77574900  | 0. 76752100  |
| H | -1. 50025600 | 6. 42551300  | 1. 87985800  |
| C | -3. 77129400 | -1. 20214500 | -2. 79659900 |
| C | -2. 84979300 | -2. 20127700 | -3. 14425700 |
| C | -5. 08054100 | -1. 59355200 | -2. 48015000 |
| C | -3. 21710800 | -3. 54618300 | -3. 16141700 |

|   |             |             |             |
|---|-------------|-------------|-------------|
| H | -1.83387800 | -1.91877800 | -3.39808400 |
| C | -5.44974100 | -2.93914600 | -2.49013300 |
| H | -5.82308700 | -0.84546900 | -2.22097700 |
| C | -4.51870200 | -3.92355300 | -2.82577800 |
| H | -2.48456700 | -4.29726900 | -3.44284100 |
| H | -6.46937500 | -3.21726700 | -2.23811400 |
| H | -4.80760900 | -4.97053400 | -2.83657700 |
| C | 0.03627300  | -3.89180500 | 0.17306800  |
| C | 1.41350100  | -3.70409600 | 0.34169700  |
| C | -0.41629000 | -4.46189400 | -1.02435400 |
| C | 2.31138700  | -4.06985700 | -0.66039400 |
| H | 1.79624000  | -3.25955000 | 1.25148100  |
| C | 0.47866500  | -4.82061100 | -2.03250400 |
| H | -1.48277800 | -4.60978400 | -1.17141400 |
| C | 1.84945000  | -4.62336200 | -1.85571800 |
| H | 3.37468600  | -3.91335700 | -0.50217500 |
| H | 0.10572100  | -5.25595100 | -2.95599500 |
| H | 2.54906000  | -4.89829100 | -2.63948600 |

### TS3\_a2

|    |             |             |             |
|----|-------------|-------------|-------------|
| C  | -3.81066100 | -1.26249200 | 0.48179500  |
| C  | -2.87162000 | -2.40126600 | 0.92491100  |
| H  | -4.75232300 | -1.67959500 | 0.10358200  |
| H  | -4.05693700 | -0.62945000 | 1.33996700  |
| H  | -3.20246600 | -2.78294400 | 1.89816200  |
| H  | -2.93137800 | -3.22938000 | 0.21258300  |
| P  | -1.06518700 | -1.92824900 | 0.97518200  |
| P  | -3.09737400 | -0.09053500 | -0.77515200 |
| C  | -0.12973900 | 0.87537200  | -2.61714400 |
| C  | 0.85774000  | 1.74466300  | -2.22435500 |
| H  | -1.06714800 | 1.26608800  | -3.00277000 |
| C  | 1.79639400  | 1.33309500  | 0.36213500  |
| C  | 2.17411400  | 1.38826800  | -1.77635400 |
| Cu | -0.83873400 | 0.09807800  | -0.50606900 |
| O  | 0.80949900  | 0.56154600  | 0.51020100  |
| C  | -0.83670100 | -1.19198200 | 2.70408200  |
| C  | -0.27172700 | -3.58104800 | 1.46011200  |
| H  | -1.08337700 | -4.31658500 | 1.51957600  |
| C  | -4.49773000 | 1.16337800  | -0.95238600 |
| H  | -5.29378700 | 0.82364300  | -0.27915800 |
| C  | -3.45398200 | -0.91399800 | -2.43725500 |
| C  | 2.52569500  | -0.07225500 | -1.97067300 |
| H  | 3.46721700  | -0.34046600 | -1.49254900 |

|   |              |              |              |
|---|--------------|--------------|--------------|
| H | 2. 59789400  | -0. 33379900 | -3. 03619300 |
| H | 1. 75168100  | -0. 70517700 | -1. 52660000 |
| C | 3. 25709900  | 2. 38960700  | -1. 95511400 |
| C | 4. 58901700  | 1. 98942500  | -2. 18463500 |
| C | 3. 02027600  | 3. 77879200  | -1. 88260300 |
| C | 5. 62411500  | 2. 91536600  | -2. 30890100 |
| H | 4. 82295800  | 0. 93663200  | -2. 28610800 |
| C | 4. 05166900  | 4. 70411000  | -2. 01255300 |
| H | 2. 02039200  | 4. 15061200  | -1. 69075500 |
| C | 5. 36583400  | 4. 28303300  | -2. 22131800 |
| H | 6. 63672100  | 2. 56122900  | -2. 48647000 |
| H | 3. 82385600  | 5. 76406400  | -1. 93574400 |
| H | 6. 17043000  | 5. 00645700  | -2. 31843300 |
| H | 0. 58619000  | 2. 79709700  | -2. 17570200 |
| H | 0. 10329000  | -0. 14930300 | -2. 89447900 |
| C | 0. 29618400  | -3. 34820700 | 2. 88514500  |
| C | -0. 65437000 | -2. 40407600 | 3. 62635000  |
| H | 0. 12555000  | -0. 67585200 | 2. 62277900  |
| C | -1. 90453500 | -0. 18093700 | 3. 02610900  |
| C | -3. 06973300 | -0. 49331900 | 3. 73725000  |
| C | -1. 76699300 | 1. 11886800  | 2. 51054200  |
| C | -4. 08868800 | 0. 45299700  | 3. 88737700  |
| H | -3. 19501800 | -1. 48115100 | 4. 16973200  |
| C | -2. 78416600 | 2. 05932200  | 2. 64694900  |
| H | -0. 85028800 | 1. 37334600  | 1. 99152500  |
| C | -3. 95857700 | 1. 72474000  | 3. 32751500  |
| H | -4. 98726200 | 0. 19034300  | 4. 43985500  |
| H | -2. 66238700 | 3. 04970300  | 2. 21950700  |
| H | -4. 75577100 | 2. 45524500  | 3. 43140100  |
| C | 0. 76281200  | -4. 06771200 | 0. 47671700  |
| C | 0. 77447300  | -5. 39887700 | 0. 04665900  |
| C | 1. 74969800  | -3. 19665000 | -0. 00628100 |
| C | 1. 74318500  | -5. 85134400 | -0. 85216700 |
| H | 0. 01185500  | -6. 08306900 | 0. 41158700  |
| C | 2. 72188700  | -3. 64439900 | -0. 89838500 |
| H | 1. 74408400  | -2. 16153100 | 0. 31661000  |
| C | 2. 71877900  | -4. 97407600 | -1. 32923800 |
| H | 1. 73405900  | -6. 88758400 | -1. 17977600 |
| H | 3. 48151000  | -2. 95420800 | -1. 25270100 |
| H | 3. 47355700  | -5. 32356100 | -2. 02810400 |
| C | -4. 98989900 | 0. 99658400  | -2. 41349200 |
| C | -4. 88902200 | -0. 48837800 | -2. 78025000 |
| H | -2. 77806200 | -0. 41011700 | -3. 13903700 |
| C | -3. 09965700 | -2. 37980300 | -2. 40849500 |

|   |             |             |             |
|---|-------------|-------------|-------------|
| C | -4.05550400 | -3.38970800 | -2.25101300 |
| C | -1.74411600 | -2.74541500 | -2.44295600 |
| C | -3.66424600 | -4.72423500 | -2.10600500 |
| H | -5.11196400 | -3.14188500 | -2.23219100 |
| C | -1.34906900 | -4.07173800 | -2.29630200 |
| H | -0.98801700 | -1.97519600 | -2.55310100 |
| C | -2.31231600 | -5.06830200 | -2.11749000 |
| H | -4.42158400 | -5.49332900 | -1.98047700 |
| H | -0.29454300 | -4.32433000 | -2.30558900 |
| H | -2.00727400 | -6.10329600 | -1.99351100 |
| C | -4.12370900 | 2.57728100  | -0.58398000 |
| C | -4.94070400 | 3.32413700  | 0.27150400  |
| C | -2.96726000 | 3.17875600  | -1.09931700 |
| C | -4.61405000 | 4.63855500  | 0.60886900  |
| H | -5.83477000 | 2.86575800  | 0.68645800  |
| C | -2.63996900 | 4.49289500  | -0.77135200 |
| H | -2.30418600 | 2.60861500  | -1.74240300 |
| C | -3.46121200 | 5.22782100  | 0.08789000  |
| H | -5.25836400 | 5.19976300  | 1.27988100  |
| H | -1.73433700 | 4.93628000  | -1.17369900 |
| H | -3.20357200 | 6.25059200  | 0.34794300  |
| C | 1.72021900  | 2.76657700  | 0.74399700  |
| C | 2.85026100  | 3.49391100  | 1.13803300  |
| C | 0.47673300  | 3.41652700  | 0.68677400  |
| C | 2.73728300  | 4.83995800  | 1.48509500  |
| H | 3.81501600  | 3.00319100  | 1.16373600  |
| C | 0.36835400  | 4.76066900  | 1.03227000  |
| H | -0.40084200 | 2.86375400  | 0.37108800  |
| C | 1.49900600  | 5.47856700  | 1.43447200  |
| H | 3.62393200  | 5.39052600  | 1.78654600  |
| H | -0.60352600 | 5.24341600  | 1.00165100  |
| H | 1.41169200  | 6.52674400  | 1.70708500  |
| O | 3.09917900  | 0.78482600  | 0.67162000  |
| C | 3.24384500  | -0.27188400 | 1.50323800  |
| O | 2.44238900  | -0.62293400 | 2.34859700  |
| C | 4.52845900  | -0.98664200 | 1.24917900  |
| C | 5.52362000  | -0.45567000 | 0.41676400  |
| C | 4.71364500  | -2.23989400 | 1.84623100  |
| C | 6.69014200  | -1.18079600 | 0.18112800  |
| H | 5.37558100  | 0.51582100  | -0.03933300 |
| C | 5.87522800  | -2.96619800 | 1.59818500  |
| H | 3.93154200  | -2.63355700 | 2.48539300  |
| C | 6.86482200  | -2.43794100 | 0.76523300  |
| H | 7.46158500  | -0.76618000 | -0.46154600 |

|   |             |             |             |
|---|-------------|-------------|-------------|
| H | 6.00820900  | -3.94496100 | 2.04979000  |
| H | 7.77113700  | -3.00529600 | 0.57196600  |
| H | 0.43290400  | -4.30522100 | 3.40186600  |
| H | 1.27712000  | -2.86828300 | 2.80387400  |
| H | -1.61074900 | -2.91163000 | 3.81010500  |
| H | -0.25307000 | -2.10099800 | 4.60071800  |
| H | -6.00708600 | 1.38859200  | -2.52215900 |
| H | -4.34598200 | 1.58518900  | -3.07884800 |
| H | -5.61346700 | -1.05713800 | -2.18444200 |
| H | -5.12104100 | -0.67183900 | -3.83587700 |

**TS3\_a3**

|    |             |             |             |
|----|-------------|-------------|-------------|
| C  | -3.56660700 | 1.28135800  | 0.96847700  |
| C  | -2.86745600 | 2.49251000  | 0.33736400  |
| H  | -4.37924300 | 0.93431800  | 0.32280400  |
| H  | -4.00885800 | 1.56796900  | 1.92948800  |
| H  | -2.26250400 | 3.00533300  | 1.09067800  |
| H  | -3.61692500 | 3.20789000  | -0.02155800 |
| P  | -1.66541300 | 2.07739200  | -1.02550800 |
| P  | -2.46461100 | -0.20332500 | 1.19768700  |
| C  | -0.66589900 | -1.64474600 | -2.19579400 |
| C  | 0.43995400  | -2.32141000 | -1.74313400 |
| H  | -1.64272800 | -2.10876500 | -2.09228000 |
| C  | 1.93646900  | -0.94827900 | 0.09604600  |
| C  | 1.81622900  | -1.90506800 | -1.81290400 |
| Cu | -0.86419000 | -0.09030000 | -0.49188400 |
| O  | 1.06243200  | -0.03710800 | 0.05959600  |
| C  | -0.92524700 | 3.78834300  | -1.32178200 |
| H  | -1.49882900 | 4.47179700  | -0.68315000 |
| C  | -2.70333300 | 2.11892000  | -2.60842500 |
| C  | -1.64690600 | 0.03325700  | 2.88739500  |
| H  | -0.76558400 | -0.61507700 | 2.84628800  |
| C  | -3.71801500 | -1.46206600 | 1.83704800  |
| H  | -4.65063100 | -0.90457700 | 1.98821400  |
| C  | 2.07398000  | -0.69793000 | -2.69251600 |
| H  | 3.04619500  | -0.24498100 | -2.49288400 |
| H  | 2.02550600  | -0.95861100 | -3.75925100 |
| H  | 1.32167500  | 0.06932100  | -2.49891500 |
| C  | 2.86760700  | -2.95539800 | -1.77934000 |
| C  | 4.14143400  | -2.72126900 | -2.33687000 |
| C  | 2.67299100  | -4.20697800 | -1.15862700 |
| C  | 5.16070500  | -3.66924900 | -2.26589100 |
| H  | 4.33992300  | -1.78552200 | -2.84525100 |



|   |             |             |             |
|---|-------------|-------------|-------------|
| C | 3.68810100  | -5.15764900 | -1.09313700 |
| H | 1.72311200  | -4.44328600 | -0.69342600 |
| C | 4.94427500  | -4.89808200 | -1.64186500 |
| H | 6.12768300  | -3.44559400 | -2.70985400 |
| H | 3.49426800  | -6.10488000 | -0.59656700 |
| H | 5.73655400  | -5.63930600 | -1.58765500 |
| H | 0.23639000  | -3.23537900 | -1.19021900 |
| H | -0.58489000 | -0.83856800 | -2.92089800 |
| O | 3.29807700  | -0.48847800 | -0.07694700 |
| C | 1.86548500  | -2.09080500 | 1.05055900  |
| C | 3.00497100  | -2.78497400 | 1.47560000  |
| C | 0.60908100  | -2.52561500 | 1.49691400  |
| C | 2.88741300  | -3.87515500 | 2.33849000  |
| H | 3.98090300  | -2.47949700 | 1.11934400  |
| C | 0.48894000  | -3.62577700 | 2.34003200  |
| H | -0.26930000 | -1.99185800 | 1.15826900  |
| C | 1.63320300  | -4.30514200 | 2.77002400  |
| H | 3.78297400  | -4.40023000 | 2.65825400  |
| H | -0.49584900 | -3.95498300 | 2.66219800  |
| H | 1.54476700  | -5.16161100 | 3.43245500  |
| C | 3.77750000  | 0.38911500  | 0.84027900  |
| C | 5.14835500  | 0.85153000  | 0.47893100  |
| C | 5.67925000  | 1.93838400  | 1.18520600  |
| C | 5.89716400  | 0.24004000  | -0.53501400 |
| C | 6.94553800  | 2.42288800  | 0.86835000  |
| H | 5.07869200  | 2.38732400  | 1.96887900  |
| C | 7.16905000  | 0.72248500  | -0.84116200 |
| H | 5.48490400  | -0.61209700 | -1.06284900 |
| C | 7.69137600  | 1.81547300  | -0.14627700 |
| H | 7.35410500  | 3.27005900  | 1.41192800  |
| H | 7.75294300  | 0.24543300  | -1.62317200 |
| H | 8.68032400  | 2.19246500  | -0.39221300 |
| O | 3.17801000  | 0.75882400  | 1.82795600  |
| C | -1.28554500 | 4.11236500  | -2.79297000 |
| H | -1.19241200 | 5.18738700  | -2.98313100 |
| H | -0.57731400 | 3.60434600  | -3.46017400 |
| C | -2.70737400 | 3.59084500  | -3.04459100 |
| H | -3.41376600 | 4.17124500  | -2.43804100 |
| H | -3.01257900 | 3.69921900  | -4.09205600 |
| H | -2.10476900 | 1.55413500  | -3.33483200 |
| C | -3.17853300 | -1.85597300 | 3.23384500  |
| C | -2.63565600 | -0.57915600 | 3.89092000  |
| H | -2.14791400 | -0.78355100 | 4.85090600  |
| H | -3.46846300 | 0.10738900  | 4.08846300  |

|   |             |             |             |
|---|-------------|-------------|-------------|
| H | -3.96480000 | -2.33489900 | 3.82804400  |
| H | -2.36763300 | -2.58612100 | 3.12124300  |
| C | 0.53843600  | 3.93899400  | -0.98088000 |
| C | 0.99869200  | 5.13446000  | -0.41410800 |
| C | 1.46184700  | 2.91846900  | -1.23181100 |
| C | 2.34852100  | 5.30684000  | -0.10466800 |
| H | 0.28922800  | 5.93115600  | -0.20140000 |
| C | 2.81151300  | 3.08930300  | -0.93189200 |
| H | 1.12305200  | 1.96272000  | -1.61104300 |
| C | 3.26136300  | 4.28195600  | -0.36388900 |
| H | 2.68464000  | 6.23776600  | 0.34414000  |
| H | 3.50836600  | 2.28253600  | -1.12922400 |
| H | 4.31213900  | 4.40140800  | -0.11625600 |
| C | -4.00104400 | 1.38479300  | -2.39292300 |
| C | -3.96994400 | -0.01907800 | -2.37389000 |
| C | -5.20594500 | 2.02660100  | -2.08450900 |
| C | -5.09177000 | -0.76333300 | -2.02071500 |
| H | -3.04211600 | -0.52624200 | -2.61251400 |
| C | -6.33833000 | 1.28339400  | -1.73749500 |
| H | -5.26651700 | 3.11025000  | -2.10288400 |
| C | -6.28273000 | -0.11030800 | -1.69117800 |
| H | -5.03285300 | -1.84624400 | -1.98936300 |
| H | -7.26420600 | 1.79945200  | -1.49804700 |
| H | -7.15958300 | -0.68551200 | -1.40807500 |
| C | -4.00134600 | -2.60771600 | 0.89776000  |
| C | -5.32389200 | -2.98643500 | 0.63877300  |
| C | -2.96953100 | -3.31153900 | 0.26033100  |
| C | -5.61428300 | -4.03276000 | -0.23849700 |
| H | -6.13461100 | -2.44518100 | 1.12059100  |
| C | -3.25413300 | -4.35330500 | -0.62108400 |
| H | -1.93685700 | -3.03104400 | 0.43393400  |
| C | -4.57897500 | -4.71626000 | -0.87770000 |
| H | -6.64843200 | -4.30718200 | -0.42794800 |
| H | -2.43912500 | -4.87878500 | -1.11114800 |
| H | -4.80053200 | -5.52499900 | -1.56802500 |
| C | -1.16877100 | 1.45325400  | 3.05594000  |
| C | -1.93302900 | 2.44800100  | 3.67853200  |
| C | 0.04839400  | 1.81176000  | 2.45398000  |
| C | -1.50743900 | 3.77961900  | 3.66558500  |
| H | -2.86863800 | 2.19348200  | 4.16809600  |
| C | 0.46950700  | 3.13938500  | 2.43541500  |
| H | 0.66342500  | 1.05700000  | 1.97615200  |
| C | -0.31427200 | 4.13143900  | 3.03079400  |
| H | -2.11339700 | 4.54126700  | 4.14958300  |

|   |            |            |            |
|---|------------|------------|------------|
| H | 1.40669400 | 3.38917100 | 1.94961200 |
| H | 0.00908000 | 5.16859900 | 3.00951500 |

**TS3\_a4**

|    |             |             |             |
|----|-------------|-------------|-------------|
| C  | -3.07635700 | 2.31288700  | 0.39906400  |
| C  | -3.59626400 | 1.05626500  | 1.12651200  |
| H  | -3.91991200 | 2.90388200  | 0.02258300  |
| H  | -2.52233600 | 2.94394300  | 1.09943300  |
| H  | -3.94118300 | 1.33096400  | 2.13029400  |
| H  | -4.45087600 | 0.63831400  | 0.58580400  |
| P  | -2.33776100 | -0.31128000 | 1.20098900  |
| P  | -1.87439100 | 1.96628700  | -0.98560100 |
| C  | -0.16808600 | -0.83036400 | -2.62277300 |
| C  | 1.19536500  | -1.00465700 | -2.43929300 |
| H  | -0.49600200 | 0.03044600  | -3.19993400 |
| C  | 1.73062700  | -1.54874900 | 0.28824000  |
| C  | 1.85564600  | -2.15183200 | -1.92870700 |
| Cu | -0.75738500 | -0.07416000 | -0.62738700 |
| O  | 0.51878800  | -1.28188700 | 0.46332600  |
| C  | -1.29316500 | 0.07521900  | 2.73135300  |
| C  | -3.27721200 | -1.71606200 | 2.03803100  |
| H  | -4.26503700 | -1.33051300 | 2.32019600  |
| C  | -1.37763500 | 3.71353300  | -1.49705100 |
| H  | -1.96128700 | 4.39790800  | -0.86882200 |
| C  | -2.98340400 | 1.71257900  | -2.49886300 |
| C  | 1.01339700  | -3.40506700 | -1.83380900 |
| H  | 1.48488200  | -4.18443500 | -1.23388800 |
| H  | 0.79523500  | -3.82319800 | -2.82726200 |
| H  | 0.05884800  | -3.17206800 | -1.35399900 |
| C  | 3.30897500  | -2.29001300 | -2.15707600 |
| C  | 3.93464800  | -3.55273900 | -2.14813000 |
| C  | 4.15328300  | -1.17348400 | -2.35192600 |
| C  | 5.31366500  | -3.69271500 | -2.30640000 |
| H  | 3.33948100  | -4.44673500 | -2.01018100 |
| C  | 5.52803200  | -1.31143300 | -2.50734400 |
| H  | 3.73233200  | -0.17530900 | -2.36054300 |
| C  | 6.12637600  | -2.57541000 | -2.48104900 |
| H  | 5.75065700  | -4.68782700 | -2.28717300 |
| H  | 6.13922000  | -0.42345700 | -2.65290400 |
| H  | 7.20054400  | -2.68196900 | -2.60188200 |
| C  | 2.35634000  | -2.75601300 | 0.86315400  |
| C  | 3.74732000  | -2.93649000 | 0.88701700  |
| C  | 1.52745300  | -3.75980000 | 1.39137100  |

|   |              |              |              |
|---|--------------|--------------|--------------|
| C | 4. 29439500  | -4. 09709200 | 1. 43055700  |
| H | 4. 39640300  | -2. 17385800 | 0. 47540200  |
| C | 2. 07850000  | -4. 91893800 | 1. 92729200  |
| H | 0. 45382500  | -3. 61330900 | 1. 37880500  |
| C | 3. 46593700  | -5. 09268000 | 1. 94917200  |
| H | 5. 37304700  | -4. 22459900 | 1. 43820700  |
| H | 1. 42623200  | -5. 68613900 | 2. 33571400  |
| H | 3. 89610700  | -5. 99745500 | 2. 36966700  |
| H | 1. 81099900  | -0. 13688300 | -2. 66436900 |
| H | -0. 83412900 | -1. 68949100 | -2. 64993200 |
| C | 2. 86638900  | 0. 22500700  | 1. 36414900  |
| O | 2. 63735200  | -0. 43024600 | 0. 19161200  |
| O | 2. 31843200  | -0. 04290300 | 2. 41297600  |
| C | 3. 84762000  | 1. 33127900  | 1. 20421900  |
| C | 4. 82553000  | 1. 31468100  | 0. 20276000  |
| C | 3. 78673600  | 2. 39623900  | 2. 11118900  |
| C | 5. 73704800  | 2. 36554400  | 0. 10956100  |
| H | 4. 87494100  | 0. 47618700  | -0. 48116400 |
| C | 4. 68512100  | 3. 45409900  | 1. 99985300  |
| H | 3. 02444800  | 2. 38231800  | 2. 88229400  |
| C | 5. 66326700  | 3. 43841500  | 1. 00162400  |
| H | 6. 50563100  | 2. 34664300  | -0. 65800600 |
| H | 4. 62680000  | 4. 28852100  | 2. 69262400  |
| H | 6. 37126100  | 4. 25907900  | 0. 92278700  |
| C | -2. 47124800 | -1. 99106000 | 3. 33272600  |
| C | -2. 01096300 | -0. 63823000 | 3. 88646400  |
| H | -0. 34910100 | -0. 44365400 | 2. 53314500  |
| C | -0. 99777200 | 1. 54839100  | 2. 85191200  |
| C | -1. 72663800 | 2. 41320400  | 3. 67684300  |
| C | 0. 00511500  | 2. 09791200  | 2. 03679700  |
| C | -1. 47052300 | 3. 78818400  | 3. 67366400  |
| H | -2. 50158500 | 2. 02032500  | 4. 32742300  |
| C | 0. 27256300  | 3. 46386700  | 2. 03742800  |
| H | 0. 56877600  | 1. 43846500  | 1. 39099400  |
| C | -0. 47454200 | 4. 31888800  | 2. 85310200  |
| H | -2. 05088600 | 4. 44248400  | 4. 31896200  |
| H | 1. 05724800  | 3. 85708800  | 1. 40112700  |
| H | -0. 27519800 | 5. 38695200  | 2. 85229800  |
| C | -3. 45592600 | -2. 92018900 | 1. 14586100  |
| C | -4. 68887200 | -3. 57707400 | 1. 07688400  |
| C | -2. 39117800 | -3. 40412000 | 0. 37003200  |
| C | -4. 86372700 | -4. 68784700 | 0. 24840800  |
| H | -5. 52301200 | -3. 20675100 | 1. 66837900  |
| C | -2. 56249900 | -4. 51130300 | -0. 45878900 |

|   |             |             |             |
|---|-------------|-------------|-------------|
| H | -1.43419400 | -2.89085300 | 0.39522900  |
| C | -3.80134000 | -5.15578900 | -0.52630900 |
| H | -5.83066300 | -5.18177600 | 0.20399900  |
| H | -1.72751400 | -4.86713300 | -1.05591600 |
| H | -3.93568600 | -6.01564300 | -1.17647600 |
| C | -1.88488900 | 3.85404000  | -2.95440900 |
| C | -3.23014800 | 3.12477700  | -3.04842300 |
| H | -2.34292000 | 1.18536000  | -3.21598700 |
| C | -4.15684200 | 0.82205900  | -2.17675000 |
| C | -5.42848500 | 1.31968600  | -1.86973300 |
| C | -3.94191700 | -0.56228900 | -2.07836700 |
| C | -6.44716100 | 0.45989600  | -1.44818900 |
| H | -5.63074200 | 2.38308300  | -1.94915100 |
| C | -4.95177100 | -1.42233100 | -1.65548200 |
| H | -2.96148300 | -0.96454400 | -2.31040000 |
| C | -6.21003900 | -0.90990300 | -1.32828600 |
| H | -7.42651700 | 0.86646400  | -1.21045600 |
| H | -4.75279200 | -2.48515600 | -1.57079600 |
| H | -6.99838600 | -1.57614000 | -0.98993400 |
| C | 0.08858900  | 4.02871600  | -1.31644700 |
| C | 0.47660600  | 5.30809300  | -0.90124800 |
| C | 1.08531700  | 3.07322400  | -1.55836400 |
| C | 1.82335600  | 5.62429200  | -0.71632500 |
| H | -0.28704800 | 6.05681500  | -0.70318200 |
| C | 2.43094700  | 3.38375200  | -1.37123500 |
| H | 0.80632800  | 2.06706400  | -1.85694400 |
| C | 2.80576800  | 4.65947600  | -0.94490500 |
| H | 2.10283600  | 6.61988200  | -0.38224900 |
| H | 3.18714000  | 2.62402400  | -1.53456800 |
| H | 3.85338900  | 4.88902500  | -0.78119900 |
| H | -3.07601200 | -2.55801000 | 4.04951200  |
| H | -1.59556200 | -2.60460500 | 3.08792900  |
| H | -2.88945300 | -0.06835800 | 4.21552900  |
| H | -1.34971000 | -0.74957200 | 4.75368800  |
| H | -3.97028700 | 3.65608900  | -2.43724300 |
| H | -3.61769800 | 3.09270400  | -4.07358100 |
| H | -1.95665900 | 4.91038300  | -3.23629800 |
| H | -1.16083600 | 3.38765500  | -3.63481200 |

### TS3\_b1

|   |            |             |            |
|---|------------|-------------|------------|
| C | 2.72742800 | -1.90699100 | 0.88403900 |
| C | 1.59437800 | -2.94180300 | 0.88437000 |
| H | 3.36096800 | -2.04503700 | 0.00198100 |

|    |             |             |             |
|----|-------------|-------------|-------------|
| H  | 3.35865300  | -2.04515200 | 1.76932600  |
| H  | 1.10745400  | -2.96613500 | 1.86412000  |
| H  | 2.00313600  | -3.94052500 | 0.69578100  |
| P  | 0.21936500  | -2.55885400 | -0.31394200 |
| P  | 2.13984200  | -0.13993500 | 0.78685400  |
| C  | 0.23826900  | 0.49569800  | -2.61558400 |
| C  | -0.46827600 | 1.66749800  | -2.40642000 |
| H  | 1.31532900  | 0.58736500  | -2.72253300 |
| C  | -1.98048100 | 1.72498300  | -0.07156800 |
| C  | -1.86174700 | 1.95732600  | -2.36501300 |
| Cu | 0.22004800  | -0.16725900 | -0.50130500 |
| O  | -1.58840600 | 0.55538600  | 0.13631700  |
| C  | -0.99085100 | -3.93803900 | 0.10268800  |
| H  | -0.40513600 | -4.69685400 | 0.63911300  |
| C  | 0.71264900  | -3.34350000 | -1.97605900 |
| C  | 1.87795000  | 0.41233700  | 2.57274400  |
| H  | 1.17331900  | 1.24293300  | 2.49358000  |
| C  | 3.78257200  | 0.76678700  | 0.60263300  |
| C  | -2.19657800 | 3.42284900  | -2.57189900 |
| C  | -3.38084100 | 2.14579100  | 0.10268500  |
| C  | -3.73428800 | 3.47804900  | 0.36735000  |
| C  | -4.39694900 | 1.18458600  | -0.02741000 |
| C  | -5.07329600 | 3.83537600  | 0.51611700  |
| H  | -2.95838800 | 4.22896600  | 0.45977700  |
| C  | -5.73192600 | 1.54814000  | 0.11353400  |
| H  | -4.12964600 | 0.16399000  | -0.26372800 |
| C  | -6.07714900 | 2.87331400  | 0.39059500  |
| H  | -5.33162900 | 4.86861600  | 0.73100300  |
| H  | -6.50478500 | 0.79386300  | -0.00344600 |
| H  | -7.12039900 | 3.15501000  | 0.50299200  |
| H  | 0.15498500  | 2.52743400  | -2.16174900 |
| H  | -0.22066300 | -0.36313400 | -3.09661500 |
| C  | -0.58880100 | 2.92456200  | 1.45460200  |
| O  | -1.02651800 | 2.78958400  | 0.18055600  |
| O  | -1.03439100 | 2.31433700  | 2.40601300  |
| C  | 0.53469600  | 3.89858900  | 1.55746700  |
| C  | 1.04344800  | 4.57695800  | 0.44316100  |
| C  | 1.10859400  | 4.10174100  | 2.81996400  |
| C  | 2.13653300  | 5.42984600  | 0.58701600  |
| H  | 0.58628300  | 4.42325000  | -0.52723800 |
| C  | 2.19726500  | 4.95766100  | 2.96148100  |
| H  | 0.69024500  | 3.57162400  | 3.66880800  |
| C  | 2.71664900  | 5.61727300  | 1.84333400  |
| H  | 2.54019700  | 5.94064900  | -0.28187900 |

|   |             |             |             |
|---|-------------|-------------|-------------|
| H | 2.64485500  | 5.10829300  | 3.93947100  |
| H | 3.57225800  | 6.27767900  | 1.95187900  |
| H | -1.41263900 | 4.05502200  | -2.14303600 |
| H | -2.27758100 | 3.67881300  | -3.63863500 |
| H | -3.14095700 | 3.70627500  | -2.09692900 |
| C | -2.88948300 | 0.97110600  | -2.74536000 |
| C | -4.12447500 | 1.39082400  | -3.28344800 |
| C | -2.75059600 | -0.41384600 | -2.49345300 |
| C | -5.15304200 | 0.49130500  | -3.55432800 |
| H | -4.29060800 | 2.44251900  | -3.48424300 |
| C | -3.78549200 | -1.30964200 | -2.74933900 |
| H | -1.85089900 | -0.78477700 | -2.02697200 |
| C | -4.99548900 | -0.86879600 | -3.28764500 |
| H | -6.08808100 | 0.86090000  | -3.96766200 |
| H | -3.64900500 | -2.36163200 | -2.51013800 |
| H | -5.79959500 | -1.57047800 | -3.49099500 |
| C | -1.33798100 | -4.53594100 | -1.27861600 |
| H | -1.87692300 | -5.48331700 | -1.16602800 |
| H | -1.99857000 | -3.84989400 | -1.82445200 |
| C | -0.00858000 | -4.70341600 | -2.02522300 |
| H | 0.58349800  | -5.47364900 | -1.51697600 |
| H | -0.14808500 | -5.03434600 | -3.06070000 |
| H | 0.24331600  | -2.68599400 | -2.71644200 |
| C | -2.16764200 | -3.56130800 | 0.97091900  |
| C | -2.63532400 | -4.48898400 | 1.91174200  |
| C | -2.80913100 | -2.32004400 | 0.87426100  |
| C | -3.72171500 | -4.19277500 | 2.73434700  |
| H | -2.13435900 | -5.45020800 | 2.00465000  |
| C | -3.89196000 | -2.01851200 | 1.70182100  |
| H | -2.43905200 | -1.56173100 | 0.19502300  |
| C | -4.35442900 | -2.95225600 | 2.63104800  |
| H | -4.06602600 | -4.92445500 | 3.46032400  |
| H | -4.35740100 | -1.04054500 | 1.63283800  |
| H | -5.19287500 | -2.71025600 | 3.27821100  |
| C | 2.20313400  | -3.29789200 | -2.19077400 |
| C | 3.06530100  | -4.31201700 | -1.75177300 |
| C | 2.77075100  | -2.14303000 | -2.75096700 |
| C | 4.45035800  | -4.16327200 | -1.84598400 |
| H | 2.65974100  | -5.22346700 | -1.32370000 |
| C | 4.15252800  | -1.98826200 | -2.84335500 |
| H | 2.11745700  | -1.35219500 | -3.10127500 |
| C | 5.00051600  | -2.99785800 | -2.38232700 |
| H | 5.09988800  | -4.96115400 | -1.49625100 |
| H | 4.56053900  | -1.07469500 | -3.26348600 |

|   |             |             |             |
|---|-------------|-------------|-------------|
| H | 6.07867600  | -2.88203700 | -2.44878700 |
| C | 3.23496000  | 0.97774800  | 3.01943200  |
| H | 3.11904800  | 1.63283900  | 3.89070600  |
| H | 3.92031500  | 0.17110800  | 3.30768200  |
| C | 3.81658100  | 1.72944600  | 1.81379200  |
| H | 3.20500900  | 2.61127900  | 1.59743000  |
| H | 4.83824100  | 2.08227000  | 1.99463300  |
| H | 4.56674700  | 0.01260100  | 0.74296300  |
| C | 1.20828200  | -0.68127800 | 3.36480900  |
| C | 1.91872600  | -1.58813000 | 4.16013600  |
| C | -0.17465500 | -0.86923000 | 3.19538100  |
| C | 1.26936500  | -2.67349200 | 4.75482000  |
| H | 2.98559000  | -1.45831300 | 4.31550300  |
| C | -0.82107500 | -1.95310500 | 3.78630000  |
| H | -0.73808100 | -0.16939800 | 2.58523600  |
| C | -0.09921400 | -2.86481100 | 4.56140600  |
| H | 1.83766700  | -3.36965600 | 5.36621100  |
| H | -1.88566900 | -2.08951600 | 3.63334100  |
| H | -0.60437900 | -3.71394600 | 5.01305400  |
| C | 3.97284500  | 1.41775600  | -0.74335900 |
| C | 5.11585600  | 1.15800800  | -1.50665100 |
| C | 3.00651900  | 2.29063200  | -1.26208800 |
| C | 5.29280800  | 1.75324500  | -2.75810200 |
| H | 5.86972100  | 0.47631300  | -1.12034700 |
| C | 3.17868600  | 2.88779100  | -2.50850600 |
| H | 2.10485300  | 2.48459400  | -0.69297100 |
| C | 4.32283700  | 2.61873900  | -3.26447200 |
| H | 6.18750700  | 1.53829600  | -3.33632900 |
| H | 2.41226400  | 3.55298300  | -2.89695300 |
| H | 4.45460500  | 3.07849300  | -4.23969100 |

### TS3\_b2

|   |            |             |             |
|---|------------|-------------|-------------|
| C | 2.72886400 | 2.64833100  | 0.67190900  |
| C | 1.37289200 | 3.06160700  | 1.27409700  |
| H | 3.28299700 | 3.53803300  | 0.34781700  |
| H | 3.33384700 | 2.14666200  | 1.43266200  |
| H | 1.53646200 | 3.43913100  | 2.29070400  |
| H | 0.94717500 | 3.88300000  | 0.68960600  |
| P | 0.04368200 | 1.73987300  | 1.27097900  |
| P | 2.64382900 | 1.42918800  | -0.72470500 |
| C | 0.64571100 | -0.75130700 | -2.75750500 |
| C | 0.31098600 | -2.06349300 | -2.46997200 |
| H | 1.64922800 | -0.55163700 | -3.12528700 |



|    |             |             |             |
|----|-------------|-------------|-------------|
| C  | -0.77341700 | -2.41547800 | 0.11245400  |
| C  | -0.95046600 | -2.64925400 | -2.17703700 |
| Cu | 0.91945300  | -0.01895500 | -0.61583200 |
| O  | -0.28811200 | -1.27525900 | 0.30711700  |
| C  | 0.41500300  | 0.73266100  | 2.84224200  |
| C  | -1.34268300 | 2.72816000  | 2.13380700  |
| H  | -0.92383300 | 3.71890600  | 2.34846600  |
| C  | 4.46934600  | 1.09684600  | -1.06287100 |
| H  | 5.02386800  | 1.73044900  | -0.36012900 |
| C  | 2.41218300  | 2.47659500  | -2.27477200 |
| C  | -1.01750700 | -4.15286300 | -2.36926000 |
| H  | 1.15129500  | -2.75466300 | -2.37961600 |
| H  | -0.11495900 | -0.04477800 | -3.07969400 |
| C  | -1.58396700 | 1.99528300  | 3.47601500  |
| C  | -0.23067600 | 1.51377600  | 3.99463300  |
| H  | -0.16428000 | -0.18265200 | 2.68150100  |
| C  | 1.86690300  | 0.35946100  | 2.97957600  |
| C  | 2.79098100  | 1.12786200  | 3.69982000  |
| C  | 2.33456100  | -0.78107400 | 2.30748600  |
| C  | 4.14739800  | 0.78928500  | 3.71134400  |
| H  | 2.46003300  | 2.00292000  | 4.25012200  |
| C  | 3.68601700  | -1.11556300 | 2.30660500  |
| H  | 1.61678300  | -1.39824400 | 1.78140500  |
| C  | 4.60267600  | -0.32292800 | 3.00240200  |
| H  | 4.84766900  | 1.40041900  | 4.27518300  |
| H  | 4.02463100  | -1.98940700 | 1.75880300  |
| H  | 5.65783400  | -0.57966400 | 2.99921200  |
| C  | -2.60045400 | 2.89935700  | 1.32312500  |
| C  | -3.32264600 | 1.78081300  | 0.88691300  |
| C  | -3.10010900 | 4.17366200  | 1.03056100  |
| C  | -4.52561600 | 1.92825900  | 0.19943500  |
| H  | -2.94091800 | 0.78828300  | 1.09551100  |
| C  | -4.29227600 | 4.32890500  | 0.32034500  |
| H  | -2.54622800 | 5.04987100  | 1.35865800  |
| C  | -5.01152800 | 3.20583400  | -0.09301400 |
| H  | -5.07377000 | 1.04475700  | -0.11017900 |
| H  | -4.66310100 | 5.32637400  | 0.09897700  |
| H  | -5.94581100 | 3.32408700  | -0.63494800 |
| C  | 4.70461800  | 1.64357900  | -2.49522300 |
| C  | 3.83417900  | 2.89484800  | -2.67444300 |
| H  | 2.04977300  | 1.76611200  | -3.02750200 |
| C  | 1.34603300  | 3.52180200  | -2.05907500 |
| C  | 1.63940200  | 4.86439100  | -1.79783600 |
| C  | 0.00388400  | 3.10835300  | -2.01093900 |

|   |             |             |             |
|---|-------------|-------------|-------------|
| C | 0.62013800  | 5.76471700  | -1.47212300 |
| H | 2.66568100  | 5.21565600  | -1.83962100 |
| C | -1.01225000 | 3.99901600  | -1.67760800 |
| H | -0.23928600 | 2.06795800  | -2.20310900 |
| C | -0.70446700 | 5.33369600  | -1.39919600 |
| H | 0.86739400  | 6.80336400  | -1.26978600 |
| H | -2.03803700 | 3.65171200  | -1.61392700 |
| H | -1.49513500 | 6.02761200  | -1.13008400 |
| C | 4.90275000  | -0.33504500 | -0.85926200 |
| C | 6.06508100  | -0.62124500 | -0.13498500 |
| C | 4.16901100  | -1.40464800 | -1.39066500 |
| C | 6.48339500  | -1.93815400 | 0.06222900  |
| H | 6.64014800  | 0.19668200  | 0.29161100  |
| C | 4.58136900  | -2.72203300 | -1.19715600 |
| H | 3.25317000  | -1.20930400 | -1.93752300 |
| C | 5.74041300  | -2.99492600 | -0.46596800 |
| H | 7.38585900  | -2.13745700 | 0.63341900  |
| H | 3.98941400  | -3.53455800 | -1.60802700 |
| H | 6.06102500  | -4.02124700 | -0.31140700 |
| C | -0.01649900 | -3.65191700 | 0.40517200  |
| C | -0.65149600 | -4.84387400 | 0.77997800  |
| C | 1.38498600  | -3.62864100 | 0.30462000  |
| C | 0.10020800  | -5.98767700 | 1.04714100  |
| H | -1.73172500 | -4.86515000 | 0.86336300  |
| C | 2.13080500  | -4.77140900 | 0.57337800  |
| H | 1.88359300  | -2.71119300 | 0.01517400  |
| C | 1.49166500  | -5.95853600 | 0.94479400  |
| H | -0.40455500 | -6.90408900 | 1.34029300  |
| H | 3.21400900  | -4.73074200 | 0.50260400  |
| H | 2.07458500  | -6.85038700 | 1.15662400  |
| O | -2.18099600 | -2.55040200 | 0.33040700  |
| C | -2.74070100 | -1.87894400 | 1.37508600  |
| O | -2.12369900 | -1.48196700 | 2.34513500  |
| C | -4.20399700 | -1.68350300 | 1.19871100  |
| C | -4.85272800 | -1.97278900 | -0.00746000 |
| C | -4.92493400 | -1.13195100 | 2.26768700  |
| C | -6.21449600 | -1.70633100 | -0.14115100 |
| H | -4.29004700 | -2.37955000 | -0.83619200 |
| C | -6.28449800 | -0.87199900 | 2.13098000  |
| H | -4.39816900 | -0.90475100 | 3.18800300  |
| C | -6.93112100 | -1.15755900 | 0.92413600  |
| H | -6.70717300 | -1.91612200 | -1.08560200 |
| H | -6.83988700 | -0.43999200 | 2.95827200  |
| H | -7.99145500 | -0.94639600 | 0.81459700  |

|   |             |             |             |
|---|-------------|-------------|-------------|
| C | -2.18867500 | -1.89199200 | -2.48303700 |
| C | -3.24930500 | -2.49597800 | -3.18867400 |
| C | -2.36271700 | -0.54400500 | -2.10280500 |
| C | -4.39694800 | -1.78279300 | -3.53761800 |
| H | -3.17267200 | -3.53498800 | -3.48776600 |
| C | -3.50408600 | 0.16927700  | -2.45712300 |
| H | -1.61589100 | -0.06309700 | -1.48450200 |
| C | -4.52855900 | -0.44006100 | -3.18429800 |
| H | -5.18635000 | -2.28148800 | -4.09485100 |
| H | -3.59882100 | 1.20417400  | -2.14615500 |
| H | -5.41662700 | 0.12097800  | -3.46184200 |
| H | -1.83396000 | -4.60034300 | -1.79168200 |
| H | -1.17398800 | -4.42392300 | -3.42336900 |
| H | -0.08714400 | -4.62850200 | -2.04893000 |
| H | -2.09938100 | 2.65607800  | 4.18292900  |
| H | -2.23037100 | 1.12765400  | 3.30476900  |
| H | 0.38128800  | 2.37996400  | 4.27776000  |
| H | -0.33087900 | 0.88276100  | 4.88583500  |
| H | 5.76919900  | 1.84436400  | -2.65769400 |
| H | 4.40605500  | 0.88055100  | -3.22504300 |
| H | 3.86677600  | 3.27761700  | -3.70118300 |
| H | 4.20448000  | 3.69255800  | -2.01813700 |

### TS3\_b3

|    |             |             |             |
|----|-------------|-------------|-------------|
| C  | -3.37378900 | 1.46054400  | 1.02677000  |
| C  | -2.51285900 | 2.66017400  | 0.60700100  |
| H  | -4.19938800 | 1.32609300  | 0.32218800  |
| H  | -3.81111500 | 1.64481100  | 2.01429300  |
| H  | -1.91757100 | 3.01105400  | 1.45613100  |
| H  | -3.15719400 | 3.48890700  | 0.29160400  |
| P  | -1.25731200 | 2.28329500  | -0.71559800 |
| P  | -2.46088400 | -0.16281600 | 1.02714400  |
| C  | -0.15975900 | -0.84816600 | -2.42559700 |
| C  | 0.39023700  | -2.02883100 | -1.95159600 |
| H  | -1.18815400 | -0.88861800 | -2.77771700 |
| C  | 1.67020700  | -1.75594300 | 0.57420600  |
| C  | 1.73601600  | -2.39065900 | -1.64965600 |
| Cu | -0.61878800 | 0.02645400  | -0.47897300 |
| O  | 0.92933900  | -0.73824900 | 0.60289300  |
| C  | -0.44129400 | 3.97570500  | -0.89376500 |
| H  | -1.11607400 | 4.69061900  | -0.40541800 |
| C  | -2.17926800 | 2.42415100  | -2.37363600 |
| C  | -1.71848300 | -0.31540300 | 2.76089300  |

|   |             |             |             |
|---|-------------|-------------|-------------|
| H | -0.88402600 | -1.01107500 | 2.62012500  |
| C | -3.87795400 | -1.34902900 | 1.38895800  |
| C | 1.96125200  | -3.89770000 | -1.65692500 |
| H | -0.33151600 | -2.81742800 | -1.73180500 |
| H | 0.46621800  | -0.08364600 | -2.87831700 |
| O | 3.02438600  | -1.36163700 | 0.83364200  |
| C | 1.19915800  | -3.04652400 | 1.14952800  |
| C | -0.18032700 | -3.30619000 | 1.07927700  |
| C | 2.02900100  | -4.00450200 | 1.74496400  |
| C | -0.71235400 | -4.50317300 | 1.54419300  |
| H | -0.82305200 | -2.55804500 | 0.63689300  |
| C | 1.48975900  | -5.19665700 | 2.23253800  |
| H | 3.09438900  | -3.83735800 | 1.80357100  |
| C | 0.12461900  | -5.45950400 | 2.12744500  |
| H | -1.77823600 | -4.69084300 | 1.44545600  |
| H | 2.14997700  | -5.92789700 | 2.69074900  |
| H | -0.28485100 | -6.39632800 | 2.49458500  |
| C | 4.19678700  | -1.91884700 | 0.45225300  |
| C | 5.28948600  | -0.90793300 | 0.47492300  |
| C | 5.10168200  | 0.38399400  | 0.98131900  |
| C | 6.53150800  | -1.27727900 | -0.05327400 |
| C | 6.15627600  | 1.29401200  | 0.96638900  |
| H | 4.13092900  | 0.66383300  | 1.37212400  |
| C | 7.57894500  | -0.35999600 | -0.08068900 |
| H | 6.64763600  | -2.28014000 | -0.44798700 |
| C | 7.39387900  | 0.92586400  | 0.43188700  |
| H | 6.01277900  | 2.29273000  | 1.36979700  |
| H | 8.53854000  | -0.64573700 | -0.50190400 |
| H | 8.21209200  | 1.64075200  | 0.41460700  |
| O | 4.37000000  | -3.08371200 | 0.15393100  |
| H | 2.86580800  | -4.17711200 | -1.11738800 |
| H | 1.11821800  | -4.41084900 | -1.18502600 |
| H | 2.03932000  | -4.28347200 | -2.68458400 |
| C | 2.84437300  | -1.53922900 | -2.14862700 |
| C | 3.96191800  | -2.10125300 | -2.79681000 |
| C | 2.84500400  | -0.14049300 | -1.97219300 |
| C | 5.00770300  | -1.30925900 | -3.26488400 |
| H | 4.01995800  | -3.17563100 | -2.92449800 |
| C | 3.88837400  | 0.65264500  | -2.44542700 |
| H | 2.04390400  | 0.31035400  | -1.40188400 |
| C | 4.97684100  | 0.07625800  | -3.09993000 |
| H | 5.85406600  | -1.78015800 | -3.75854000 |
| H | 3.85585800  | 1.72798400  | -2.29530900 |
| H | 5.79445900  | 0.69418700  | -3.45969100 |

|   |             |             |             |
|---|-------------|-------------|-------------|
| C | -0.50328200 | 4.24397600  | -2.41318100 |
| H | -0.26583100 | 5.29130000  | -2.63041400 |
| H | 0.24496400  | 3.62852300  | -2.92930600 |
| C | -1.91582100 | 3.85850900  | -2.86930000 |
| H | -2.63033300 | 4.55982500  | -2.42273800 |
| H | -2.03627500 | 3.92493900  | -3.95657200 |
| H | -1.63477700 | 1.73521700  | -3.02911600 |
| C | 0.91900000  | 4.09696500  | -0.25932700 |
| C | 1.19134800  | 5.14513000  | 0.62731800  |
| C | 1.93563800  | 3.17598400  | -0.53999400 |
| C | 2.44887300  | 5.27463200  | 1.21923300  |
| H | 0.40758800  | 5.86134900  | 0.86186500  |
| C | 3.19287300  | 3.29886600  | 0.04796500  |
| H | 1.73478400  | 2.34936900  | -1.21258500 |
| C | 3.45335600  | 4.34939900  | 0.93191900  |
| H | 2.64020600  | 6.09420000  | 1.90651900  |
| H | 3.96295600  | 2.57054700  | -0.17896600 |
| H | 4.43301200  | 4.44506700  | 1.39218300  |
| C | -3.60559500 | 1.94276200  | -2.26632800 |
| C | -3.87136700 | 0.56762300  | -2.36490500 |
| C | -4.67252300 | 2.79931700  | -1.96384600 |
| C | -5.14960500 | 0.05738200  | -2.14756900 |
| H | -3.05940800 | -0.11473600 | -2.58983100 |
| C | -5.95596500 | 2.29385100  | -1.74441900 |
| H | -4.50757200 | 3.86914700  | -1.88731700 |
| C | -6.19865600 | 0.92190300  | -1.82722500 |
| H | -5.32033000 | -1.01142300 | -2.21918600 |
| H | -6.76657600 | 2.97717200  | -1.50604300 |
| H | -7.19586300 | 0.52929500  | -1.65045900 |
| C | -2.80127700 | -1.01395000 | 3.59961000  |
| H | -2.37224600 | -1.45658800 | 4.50587400  |
| H | -3.56954400 | -0.29902900 | 3.91902400  |
| C | -3.44802800 | -2.06856600 | 2.69215800  |
| H | -4.30921800 | -2.55566800 | 3.16365900  |
| H | -2.71873200 | -2.85061700 | 2.45845300  |
| H | -4.74027500 | -0.71583100 | 1.63548500  |
| C | -1.16077800 | 1.00853900  | 3.22529100  |
| C | -1.89666500 | 1.91113700  | 4.00340500  |
| C | 0.10579700  | 1.40253900  | 2.76017500  |
| C | -1.39565300 | 3.18606800  | 4.28222600  |
| H | -2.87053000 | 1.63051000  | 4.39249400  |
| C | 0.60224800  | 2.67543500  | 3.03135900  |
| H | 0.68655100  | 0.71096800  | 2.15831000  |
| C | -0.15157500 | 3.57782700  | 3.78631000  |

|   |             |             |             |
|---|-------------|-------------|-------------|
| H | -1.98402600 | 3.87306800  | 4.88490200  |
| H | 1.57205900  | 2.96589300  | 2.64115400  |
| H | 0.23219200  | 4.57366700  | 3.98939500  |
| C | -4.28839400 | -2.26724200 | 0.25909300  |
| C | -5.61823100 | -2.70378100 | 0.18926300  |
| C | -3.39457800 | -2.70457400 | -0.72659000 |
| C | -6.04520300 | -3.55076400 | -0.83327200 |
| H | -6.32799500 | -2.36472600 | 0.94044300  |
| C | -3.81542000 | -3.55267200 | -1.75118500 |
| H | -2.37255700 | -2.34585400 | -0.71802400 |
| C | -5.14349800 | -3.97855900 | -1.81050400 |
| H | -7.08279300 | -3.87106900 | -0.87109200 |
| H | -3.10416700 | -3.87092500 | -2.50846100 |
| H | -5.47398400 | -4.63323400 | -2.61168100 |

**TS3\_b4**

|    |             |             |             |
|----|-------------|-------------|-------------|
| C  | 1.50299100  | -3.10477300 | 0.79559100  |
| C  | 2.60941100  | -2.15443500 | 1.27186700  |
| H  | 1.92754500  | -4.09440400 | 0.58845000  |
| H  | 0.75346100  | -3.22871600 | 1.58447100  |
| H  | 2.88003100  | -2.39843100 | 2.30498200  |
| H  | 3.50660900  | -2.28439700 | 0.65942200  |
| P  | 2.19146900  | -0.34611700 | 1.12388700  |
| P  | 0.52998000  | -2.51989400 | -0.68391200 |
| C  | 0.67748000  | 0.89335600  | -2.46897400 |
| C  | -0.55544000 | 1.52443800  | -2.49242900 |
| H  | 0.79588000  | 0.01290900  | -3.09777400 |
| C  | -1.69311400 | 1.86840800  | 0.01999200  |
| C  | -1.00126400 | 2.77209000  | -1.96712400 |
| Cu | 0.41487000  | -0.19382700 | -0.55539700 |
| O  | -0.72936500 | 1.17972400  | 0.43011400  |
| C  | 1.29139500  | 0.12381500  | 2.73005500  |
| C  | 3.82889200  | 0.40734800  | 1.69374100  |
| H  | 4.37648100  | -0.40571400 | 2.18877500  |
| C  | -0.63291000 | -4.00444300 | -0.89318100 |
| H  | -0.20360900 | -4.77933900 | -0.24574300 |
| C  | 1.57757600  | -3.00553500 | -2.19560600 |
| C  | -2.27682200 | 3.28881300  | -2.60543300 |
| C  | -2.08141100 | 3.13050000  | 0.68335000  |
| C  | -3.33047800 | 3.73816400  | 0.48289100  |
| C  | -1.14546500 | 3.76074800  | 1.51820900  |
| C  | -3.62486200 | 4.95872900  | 1.08788900  |
| H  | -4.07254200 | 3.25225000  | -0.13989400 |

|   |             |             |             |
|---|-------------|-------------|-------------|
| C | -1.43732900 | 4.98539100  | 2.10782800  |
| H | -0.18877700 | 3.28301700  | 1.68027300  |
| C | -2.67750000 | 5.59189900  | 1.89382300  |
| H | -4.59780100 | 5.41519800  | 0.92789100  |
| H | -0.69466200 | 5.46841400  | 2.73638000  |
| H | -2.90585900 | 6.54815700  | 2.35620000  |
| H | -1.35953300 | 0.93394700  | -2.93488100 |
| H | 1.59064500  | 1.44149300  | -2.25567000 |
| C | -3.68213900 | 0.57547600  | 0.26709800  |
| O | -2.80986400 | 1.17883400  | -0.58126500 |
| O | -3.48057400 | 0.40169800  | 1.45107800  |
| C | -4.94354700 | 0.18701500  | -0.42243200 |
| C | -5.12881700 | 0.36198500  | -1.79899000 |
| C | -5.96469700 | -0.37192800 | 0.35487900  |
| C | -6.32415300 | -0.03770600 | -2.39502300 |
| H | -4.33340800 | 0.79641000  | -2.39182900 |
| C | -7.16020500 | -0.76309700 | -0.24087500 |
| H | -5.79186700 | -0.50005800 | 1.41754700  |
| C | -7.33922800 | -0.60215200 | -1.61810900 |
| H | -6.46515200 | 0.09188300  | -3.46415900 |
| H | -7.95151300 | -1.19690900 | 0.36373400  |
| H | -8.27009100 | -0.91250100 | -2.08452600 |
| C | 3.40019700  | 1.40673700  | 2.79203300  |
| C | 2.37445700  | 0.68077700  | 3.66992600  |
| H | 0.64442600  | 0.94780700  | 2.41445200  |
| C | 0.40503300  | -0.99401700 | 3.21917200  |
| C | 0.85888500  | -2.01047900 | 4.07071200  |
| C | -0.90348600 | -1.07472900 | 2.71755300  |
| C | 0.03669500  | -3.09539000 | 4.38597100  |
| H | 1.85990500  | -1.96725600 | 4.48963800  |
| C | -1.72432000 | -2.15589000 | 3.03019600  |
| H | -1.27983800 | -0.28751600 | 2.07551700  |
| C | -1.25327300 | -3.17843200 | 3.85759200  |
| H | 0.40745700  | -3.87556400 | 5.04586500  |
| H | -2.72760900 | -2.19032900 | 2.61932100  |
| H | -1.88970600 | -4.02550900 | 4.09973500  |
| C | 4.71759400  | 0.99165200  | 0.62577800  |
| C | 6.10106700  | 0.78102500  | 0.67373000  |
| C | 4.20137800  | 1.78417300  | -0.40564100 |
| C | 6.94699100  | 1.35313600  | -0.27781900 |
| H | 6.51758400  | 0.15880900  | 1.46237900  |
| C | 5.04027500  | 2.36770100  | -1.35326100 |
| H | 3.13280200  | 1.93020500  | -0.47907800 |
| C | 6.41956200  | 2.15267200  | -1.29412000 |

|   |             |             |             |
|---|-------------|-------------|-------------|
| H | 8.01756500  | 1.17463900  | -0.22477300 |
| H | 4.61116300  | 2.98591400  | -2.13668000 |
| H | 7.07628900  | 2.60130000  | -2.03400300 |
| C | -0.41227600 | -4.45446000 | -2.35238000 |
| C | 1.09463200  | -4.40688900 | -2.60745800 |
| H | 1.25418400  | -2.29810000 | -2.96834900 |
| C | 3.05577500  | -2.80909900 | -1.97133000 |
| C | 3.88811100  | -3.83289300 | -1.49911900 |
| C | 3.61474100  | -1.53641800 | -2.16511800 |
| C | 5.23180900  | -3.58601700 | -1.20882800 |
| H | 3.49255000  | -4.83147000 | -1.34554100 |
| C | 4.95540500  | -1.28745200 | -1.88069500 |
| H | 2.98612200  | -0.72837100 | -2.52540500 |
| C | 5.76866500  | -2.31154600 | -1.39155100 |
| H | 5.85681100  | -4.39421000 | -0.83838900 |
| H | 5.36117200  | -0.29386600 | -2.03037700 |
| H | 6.81061500  | -2.11318200 | -1.15855500 |
| C | -2.07015500 | -3.81639400 | -0.48999600 |
| C | -2.55793800 | -4.46654200 | 0.64943800  |
| C | -2.96083400 | -3.05369400 | -1.25804500 |
| C | -3.90257500 | -4.37258200 | 1.00985900  |
| H | -1.87429400 | -5.04940600 | 1.26107900  |
| C | -4.30869200 | -2.97660300 | -0.91490700 |
| H | -2.60099700 | -2.52382100 | -2.13610200 |
| C | -4.78401200 | -3.63368900 | 0.22215000  |
| H | -4.25933200 | -4.88326000 | 1.90029900  |
| H | -4.98963500 | -2.40191000 | -1.53168400 |
| H | -5.83381500 | -3.56133700 | 0.48888500  |
| C | -0.06331500 | 3.79739700  | -1.46321100 |
| C | 1.07707700  | 3.46312200  | -0.70395600 |
| C | -0.32322900 | 5.17129700  | -1.64065400 |
| C | 1.91780400  | 4.43919200  | -0.17400600 |
| H | 1.25051300  | 2.42445300  | -0.46360500 |
| C | 0.51476100  | 6.14891300  | -1.10861000 |
| H | -1.19634100 | 5.48602600  | -2.19976400 |
| C | 1.64749900  | 5.79296300  | -0.37629900 |
| H | 2.78783100  | 4.13792300  | 0.40396200  |
| H | 0.27769900  | 7.19768100  | -1.26899200 |
| H | 2.30342600  | 6.55550200  | 0.03442700  |
| H | -2.82014500 | 3.97131800  | -1.94480600 |
| H | -2.07147400 | 3.83601200  | -3.53726900 |
| H | -2.94543100 | 2.46111500  | -2.85487900 |
| H | 4.27163500  | 1.75274000  | 3.35956400  |
| H | 2.94368600  | 2.29062900  | 2.32683900  |



|   |             |             |             |
|---|-------------|-------------|-------------|
| H | 2.88042100  | -0.13025900 | 4.20753200  |
| H | 1.93153700  | 1.34041000  | 4.42492400  |
| H | -0.83364600 | -5.45334100 | -2.51122200 |
| H | -0.92955100 | -3.77386500 | -3.03965700 |
| H | 1.57845700  | -5.17702900 | -1.99625700 |
| H | 1.35154300  | -4.61686300 | -3.65207000 |

**Table S4.** Electronic energies ( $E_{elec}$ ), Gibbs free energies ( $G_{298}$ ), thermal correction to Gibbs free energy ( $cor G_{gas}$ ), solvation energies ( $E_{sol}$ ), solvation free energies ( $G_{sol}$ ) in THF ( $\epsilon = 7.43$ ) for all stationary points of the process. Calculations were carried out at M06/6-311+G(d,p)/SDD/SMD(THF)//M06/6-31G(d)/LANL2DZ level.

| species       | $E_{elec}$<br>(a.u.) | $G_{298}$<br>(a.u.) | $cor G_{gas}$<br>(a.u.) | $E_{sol}$<br>(a.u.) | $G_{sol}$<br>(a.u.) |
|---------------|----------------------|---------------------|-------------------------|---------------------|---------------------|
| <b>Int2_a</b> | -2582.495081         | -2581.782036        | 0.713045                | -2584.244562        | -2583.531517        |
| <b>Int2_b</b> | -2582.493309         | -2581.778662        | 0.714647                | -2584.241721        | -2583.527074        |
| <b>2a</b>     | -764.702311          | -764.539513         | 0.162799                | -764.906101         | -764.743302         |
| <b>TS3_a1</b> | -3347.200210         | -3346.294148        | 0.906062                | -3349.156950        | -3348.250888        |
| <b>TS3_a2</b> | -3347.189160         | -3346.286667        | 0.902493                | -3349.145431        | -3348.242938        |
| <b>TS3_a3</b> | -3347.191161         | -3346.285254        | 0.905907                | -3349.149588        | -3348.243681        |
| <b>TS3_a4</b> | -3347.190593         | -3346.284473        | 0.906120                | -3349.147309        | -3348.241189        |
| <b>TS3_b1</b> | -3347.196031         | -3346.288140        | 0.907892                | -3349.151987        | -3348.244095        |
| <b>TS3_b2</b> | -3347.189356         | -3346.280506        | 0.908850                | -3349.142682        | -3348.233832        |
| <b>TS3_b3</b> | -3347.177027         | -3346.266104        | 0.910923                | -3349.131876        | -3348.220953        |
| <b>TS3_b4</b> | -3347.186488         | -3346.278681        | 0.907808                | -3349.143373        | -3348.235565        |

### Cartesian coordinates for the optimized structures in Table S4

#### Int2\_a

|    |             |             |             |
|----|-------------|-------------|-------------|
| C  | -1.02555000 | 1.02585400  | 1.91473700  |
| C  | 0.23069700  | 1.87148000  | 1.70785300  |
| Cu | -0.06367100 | 0.31193400  | -1.32748800 |
| C  | -0.18941800 | 3.62390200  | -0.65278800 |
| H  | -0.14815500 | 3.54609600  | -1.75247900 |
| C  | 2.36465300  | 2.98572100  | 0.11607300  |
| H  | 2.48483200  | 3.15681200  | 1.19947600  |
| C  | -2.86682500 | -1.09202400 | 1.25212200  |
| H  | -3.14892500 | -0.54213800 | 2.16662800  |
| C  | -0.23905100 | -1.82395600 | 1.50771600  |
| H  | -0.04859900 | -2.50477100 | 0.66111200  |
| P  | 0.72582100  | 2.08305100  | -0.07356500 |
| P  | -1.19480400 | -0.39794300 | 0.72034600  |

|   |             |             |             |
|---|-------------|-------------|-------------|
| C | -0.08602600 | -0.62992300 | -3.10037900 |
| H | 0.74872800  | -0.31264100 | -3.73494600 |
| H | -1.05523300 | -0.44624800 | -3.57872500 |
| C | 0.02510500  | -1.92756800 | -2.46878600 |
| C | 1.13439800  | -2.65717600 | -2.13641900 |
| H | -0.93060400 | -2.31745900 | -2.10119000 |
| C | 2.49941400  | -2.19519400 | -2.55900800 |
| H | 3.15644300  | -3.04014900 | -2.81043200 |
| H | 2.43412800  | -1.55496400 | -3.44838800 |
| H | 3.02689000  | -1.60357900 | -1.78620900 |
| C | 1.02930500  | -3.81591000 | -1.24677500 |
| C | 2.13943000  | -4.24192200 | -0.49200400 |
| C | -0.17778700 | -4.51823600 | -1.03403000 |
| C | 2.03725800  | -5.25452400 | 0.45503400  |
| H | 3.09763900  | -3.73942000 | -0.62111300 |
| C | -0.27799800 | -5.52973900 | -0.08956900 |
| H | -1.05528400 | -4.27501700 | -1.63412300 |
| C | 0.82653000  | -5.90213900 | 0.67617900  |
| H | 2.91824400  | -5.53363400 | 1.03275400  |
| H | -1.23120200 | -6.04304500 | 0.04140200  |
| H | 0.74619300  | -6.69490400 | 1.41811100  |
| C | -1.23826000 | -2.52061000 | 2.42526100  |
| C | -2.55290900 | -2.54255300 | 1.65589700  |
| H | -0.88885800 | -3.52994000 | 2.68644700  |
| H | -1.37558300 | -1.96303000 | 3.36698200  |
| H | -3.38399600 | -2.97272100 | 2.23203000  |
| H | -2.43204600 | -3.16131500 | 0.75031500  |
| C | 2.12914100  | 4.35083500  | -0.55710500 |
| C | 0.70500300  | 4.78682000  | -0.23384300 |
| C | 1.08506500  | -1.36992000 | 2.04192300  |
| C | 1.31645000  | -1.08792700 | 3.38929800  |
| C | 2.12409800  | -1.15158600 | 1.12748100  |
| C | 2.54505000  | -0.57641900 | 3.80613100  |
| H | 0.53334300  | -1.26571300 | 4.12682900  |
| C | 3.34886300  | -0.64480100 | 1.53900900  |
| H | 1.95207100  | -1.38775500 | 0.07511800  |
| C | 3.56049100  | -0.34351100 | 2.88381500  |
| H | 2.70740100  | -0.36150600 | 4.86175700  |
| H | 4.14041900  | -0.48367600 | 0.80652500  |
| H | 4.51922100  | 0.05875800  | 3.20957100  |
| C | -3.96795500 | -0.93668300 | 0.24274800  |
| C | -5.21298900 | -0.44259900 | 0.63522100  |
| C | -3.78272200 | -1.28447000 | -1.09917100 |
| C | -6.24760800 | -0.29332000 | -0.28415500 |

|   |             |             |             |
|---|-------------|-------------|-------------|
| H | -5.36856000 | -0.16218600 | 1.67843300  |
| C | -4.81048800 | -1.13241600 | -2.02231600 |
| H | -2.81227200 | -1.66229600 | -1.42706800 |
| C | -6.04732600 | -0.63356700 | -1.61827100 |
| H | -7.21106800 | 0.09492800  | 0.04378600  |
| H | -4.64231400 | -1.40162000 | -3.06405500 |
| H | -6.85094800 | -0.51234800 | -2.34276600 |
| C | -1.62843200 | 3.58588800  | -0.22973800 |
| C | -2.49702900 | 2.70413000  | -0.88850200 |
| C | -2.12264800 | 4.32330400  | 0.84742500  |
| C | -3.80989300 | 2.54269400  | -0.46608800 |
| H | -2.12638900 | 2.11745100  | -1.73448900 |
| C | -3.44109700 | 4.16421700  | 1.27242500  |
| H | -1.47622500 | 5.02889200  | 1.36896300  |
| C | -4.28467300 | 3.26804200  | 0.62532800  |
| H | -4.46460200 | 1.84397300  | -0.98565000 |
| H | -3.80651700 | 4.74694500  | 2.11693000  |
| H | -5.31281600 | 3.13747900  | 0.96087000  |
| C | 3.57768100  | 2.25490400  | -0.38997200 |
| C | 3.56591100  | 1.56045300  | -1.60296300 |
| C | 4.76368500  | 2.29494200  | 0.34587000  |
| C | 4.71159100  | 0.91976100  | -2.06305000 |
| H | 2.64162200  | 1.49818500  | -2.18275300 |
| C | 5.91205800  | 1.65692900  | -0.11219100 |
| H | 4.78035200  | 2.82842600  | 1.29800300  |
| C | 5.88817100  | 0.96466000  | -1.31931600 |
| H | 4.68151500  | 0.37539900  | -3.00587200 |
| H | 6.82618700  | 1.69614900  | 0.47856300  |
| H | 6.78271900  | 0.45934200  | -1.67936300 |
| H | 2.88529400  | 5.07724100  | -0.22827700 |
| H | 2.24618800  | 4.23963300  | -1.64764300 |
| H | 0.62127200  | 4.97398900  | 0.84910000  |
| H | 0.42275000  | 5.71902300  | -0.74378800 |
| H | 1.09722400  | 1.38007800  | 2.17761500  |
| H | 0.11839600  | 2.85396400  | 2.19281200  |
| H | -1.07201300 | 0.66280300  | 2.95322000  |
| H | -1.92587200 | 1.63875300  | 1.74477100  |

### Int2\_b

|   |             |             |             |
|---|-------------|-------------|-------------|
| C | 0.39558500  | -1.77224200 | -1.69024200 |
| C | 1.72048300  | -1.92805600 | -0.94463300 |
| H | -0.31854100 | -2.53492800 | -1.33781600 |
| H | 0.55105200  | -1.95809800 | -2.76466900 |

|    |              |              |              |
|----|--------------|--------------|--------------|
| H  | 1. 97698700  | -2. 99374300 | -0. 83569000 |
| H  | 2. 53568000  | -1. 46192000 | -1. 51917100 |
| Cu | 0. 69291200  | 0. 89247000  | 0. 70662000  |
| C  | 1. 13407200  | -2. 32087300 | 1. 95074400  |
| H  | 0. 89992900  | -1. 69726200 | 2. 83063900  |
| C  | 3. 59377300  | -1. 37269100 | 1. 18747600  |
| H  | 4. 02286200  | -1. 99541400 | 0. 38426200  |
| C  | -2. 03026000 | -0. 56136000 | -2. 52153400 |
| H  | -1. 78673000 | -1. 50502800 | -3. 03886300 |
| C  | 0. 19838500  | 1. 01753400  | -2. 73518600 |
| H  | -0. 09641500 | 2. 00864400  | -2. 34799300 |
| P  | 1. 79986100  | -1. 08390100 | 0. 70142200  |
| P  | -0. 52798800 | -0. 16220400 | -1. 43042300 |
| C  | 0. 18445600  | 2. 73214100  | 1. 24101100  |
| H  | 1. 10926800  | 3. 32291800  | 1. 15908500  |
| H  | -0. 12914600 | 2. 69417500  | 2. 29250700  |
| C  | -0. 83460800 | 3. 21823200  | 0. 31880400  |
| C  | -2. 19739300 | 3. 22127000  | 0. 36426600  |
| H  | -0. 41892200 | 3. 68135200  | -0. 58752700 |
| C  | -2. 95813600 | 3. 91672600  | -0. 73642300 |
| H  | -3. 79842000 | 3. 31108600  | -1. 11561500 |
| H  | -3. 39296100 | 4. 87687700  | -0. 41354300 |
| H  | -2. 29785900 | 4. 14018700  | -1. 58560900 |
| C  | -2. 99700300 | 2. 63105500  | 1. 44786100  |
| C  | -2. 53585200 | 1. 55047800  | 2. 22402700  |
| C  | -4. 30602900 | 3. 07897500  | 1. 70633700  |
| C  | -3. 32878400 | 0. 96127900  | 3. 19983700  |
| H  | -1. 54436400 | 1. 14496100  | 2. 02399600  |
| C  | -5. 09312800 | 2. 50321600  | 2. 69784400  |
| H  | -4. 71351300 | 3. 90457800  | 1. 12443600  |
| C  | -4. 61282100 | 1. 43789100  | 3. 45362100  |
| H  | -2. 94015000 | 0. 11480700  | 3. 76771500  |
| H  | -6. 09539800 | 2. 89200500  | 2. 87773400  |
| H  | -5. 23072000 | 0. 98292300  | 4. 22620100  |
| C  | -2. 04149400 | 0. 55389000  | -3. 57561600 |
| C  | -0. 59950100 | 0. 76219600  | -4. 01164800 |
| C  | 3. 51150700  | -2. 22881900 | 2. 46463600  |
| C  | 2. 33930700  | -3. 18859500 | 2. 30387200  |
| C  | 4. 42368000  | -0. 12639200 | 1. 32181500  |
| C  | 5. 66774000  | -0. 04089600 | 0. 69531000  |
| C  | 3. 98161100  | 0. 96301600  | 2. 07963500  |
| C  | 6. 45140400  | 1. 10364800  | 0. 81088500  |
| H  | 6. 02092900  | -0. 88415500 | 0. 09919000  |
| C  | 4. 75726200  | 2. 11065700  | 2. 19230000  |

|   |             |             |             |
|---|-------------|-------------|-------------|
| H | 3.00482200  | 0.92426500  | 2.56650500  |
| C | 5.99522500  | 2.18587600  | 1.55686900  |
| H | 7.41860200  | 1.15109200  | 0.31219300  |
| H | 4.39048100  | 2.95272000  | 2.77715600  |
| H | 6.60101300  | 3.08621500  | 1.64397800  |
| C | -0.13655700 | -2.96222800 | 1.47748500  |
| C | -1.32032900 | -2.21383500 | 1.51903800  |
| C | -0.17996100 | -4.24799400 | 0.93681000  |
| C | -2.50965300 | -2.72149100 | 1.01326400  |
| H | -1.29895500 | -1.20524500 | 1.94037600  |
| C | -1.37447900 | -4.76547700 | 0.43755800  |
| H | 0.72195600  | -4.85957700 | 0.90697200  |
| C | -2.53735100 | -4.00409800 | 0.46656200  |
| H | -3.41306900 | -2.11069400 | 1.03737100  |
| H | -1.39208500 | -5.77288700 | 0.02374400  |
| H | -3.46825400 | -4.40819600 | 0.07205500  |
| C | 1.69591900  | 0.95312100  | -2.78923300 |
| C | 2.38782100  | 0.18098100  | -3.72589200 |
| C | 2.44091200  | 1.62937800  | -1.81242000 |
| C | 3.77547900  | 0.06046200  | -3.66735100 |
| H | 1.84444900  | -0.33688200 | -4.51576500 |
| C | 3.82216600  | 1.49839900  | -1.74069900 |
| H | 1.91964600  | 2.25712500  | -1.08468200 |
| C | 4.49578000  | 0.70422100  | -2.66699900 |
| H | 4.29337400  | -0.54404500 | -4.41099200 |
| H | 4.37491200  | 2.01043000  | -0.95265200 |
| H | 5.57893200  | 0.60166800  | -2.61116400 |
| C | -3.32781400 | -0.74079700 | -1.79006200 |
| C | -3.77104800 | 0.20945400  | -0.86686500 |
| C | -4.12957300 | -1.85551300 | -2.04109700 |
| C | -4.98747700 | 0.05193300  | -0.21226900 |
| H | -3.14174200 | 1.07268300  | -0.63723600 |
| C | -5.35000000 | -2.01709900 | -1.39100100 |
| H | -3.78774500 | -2.60811600 | -2.75419300 |
| C | -5.78106200 | -1.06371600 | -0.47346800 |
| H | -5.30541400 | 0.80322800  | 0.51120000  |
| H | -5.96399500 | -2.89211600 | -1.60219500 |
| H | -6.73415900 | -1.18869500 | 0.03839400  |
| H | -2.43745200 | 1.48077100  | -3.12845600 |
| H | -2.70746900 | 0.29187400  | -4.40984400 |
| H | -0.48528600 | 1.58769700  | -4.72911200 |
| H | -0.24679400 | -0.15180000 | -4.51593700 |
| H | 4.46512600  | -2.74325400 | 2.64529100  |
| H | 3.33556200  | -1.57163700 | 3.33163500  |

|   |             |              |             |
|---|-------------|--------------|-------------|
| H | 2. 15410600 | -3. 78578600 | 3. 20798400 |
| H | 2. 55980900 | -3. 89802200 | 1. 48975000 |

**2a**

|   |              |              |              |
|---|--------------|--------------|--------------|
| C | -4. 75446300 | 0. 00870800  | -0. 32911000 |
| C | -3. 57883100 | -0. 69496600 | -0. 54212300 |
| C | -2. 35935800 | -0. 16720200 | -0. 10972200 |
| C | -2. 32520400 | 1. 06969500  | 0. 53876900  |
| C | -3. 50499700 | 1. 77043400  | 0. 75088400  |
| C | -4. 71741600 | 1. 24236600  | 0. 31685700  |
| H | -5. 70329500 | -0. 40259500 | -0. 66779400 |
| H | -3. 57943400 | -1. 66057400 | -1. 04340300 |
| H | -1. 37505200 | 1. 47457200  | 0. 87799300  |
| H | -3. 47922800 | 2. 73293100  | 1. 25809400  |
| H | -5. 64059400 | 1. 79460200  | 0. 48464600  |
| C | -1. 14385400 | -0. 96728600 | -0. 36776000 |
| O | -1. 11657400 | -2. 04794400 | -0. 88591800 |
| O | 0. 00011200  | -0. 28052500 | -0. 00085300 |
| C | 1. 14364100  | -0. 96724300 | 0. 36711800  |
| O | 1. 11605300  | -2. 04769700 | 0. 88574800  |
| C | 2. 35933200  | -0. 16733400 | 0. 10952800  |
| C | 2. 32563100  | 1. 06914200  | -0. 53977500 |
| C | 3. 57846400  | -0. 69477900 | 0. 54323200  |
| C | 3. 50556400  | 1. 76979300  | -0. 75141000 |
| H | 1. 37572100  | 1. 47375000  | -0. 88002600 |
| C | 4. 75424400  | 0. 00878300  | 0. 33065100  |
| H | 3. 57870200  | -1. 66006200 | 1. 04513400  |
| C | 4. 71766400  | 1. 24203200  | -0. 31612600 |
| H | 3. 48015800  | 2. 73195200  | -1. 25928100 |
| H | 5. 70282700  | -0. 40228800 | 0. 67031700  |
| H | 5. 64096200  | 1. 79416900  | -0. 48357500 |

**TS3\_a1**

|   |              |              |              |
|---|--------------|--------------|--------------|
| C | -3. 24103500 | -1. 38056900 | 0. 67711400  |
| C | -3. 74075300 | 0. 00409400  | 0. 27435500  |
| H | -3. 38594000 | -2. 09246400 | -0. 15505200 |
| H | -3. 81735000 | -1. 76542100 | 1. 53274200  |
| H | -3. 75629500 | 0. 67872900  | 1. 14585900  |
| H | -4. 77228300 | -0. 05781200 | -0. 10434500 |
| P | -2. 63697500 | 0. 85344900  | -0. 95637300 |
| P | -1. 41270100 | -1. 46101700 | 1. 03647200  |
| C | 0. 38120600  | -0. 86927100 | -2. 33822700 |

|    |              |              |              |
|----|--------------|--------------|--------------|
| C  | 1. 71923800  | -0. 68544500 | -2. 03517300 |
| H  | -0. 02185900 | -1. 87997700 | -2. 22803800 |
| C  | 2. 08972600  | 1. 25851600  | -0. 07562000 |
| C  | 2. 50627100  | 0. 47747300  | -2. 21971200 |
| Cu | -0. 46478600 | -0. 06275000 | -0. 52946200 |
| O  | 0. 85966700  | 1. 43661600  | -0. 09219200 |
| C  | -3. 42991700 | 2. 55451900  | -1. 02097200 |
| H  | -4. 45579500 | 2. 42442300  | -0. 63206500 |
| C  | -3. 28217200 | 0. 38202400  | -2. 68298700 |
| C  | -1. 23409900 | -1. 07588000 | 2. 86656400  |
| H  | -0. 17180200 | -0. 80036300 | 2. 96159400  |
| C  | -1. 21141700 | -3. 31935300 | 1. 28474000  |
| C  | 1. 84969700  | 1. 59721900  | -2. 98050500 |
| H  | 2. 37284500  | 2. 55433100  | -2. 87056900 |
| H  | 1. 78065700  | 1. 38194400  | -4. 05944700 |
| H  | 0. 82594200  | 1. 75783700  | -2. 60844000 |
| C  | 3. 97406800  | 0. 35118200  | -2. 26687800 |
| C  | 4. 78762300  | 1. 41056300  | -2. 70918300 |
| C  | 4. 65498000  | -0. 80887300 | -1. 84256500 |
| C  | 6. 17565600  | 1. 33446000  | -2. 68722400 |
| H  | 4. 33247200  | 2. 33215900  | -3. 06619400 |
| C  | 6. 03991600  | -0. 88273200 | -1. 80798400 |
| H  | 4. 08919500  | -1. 68977400 | -1. 54404700 |
| C  | 6. 82003100  | 0. 19383800  | -2. 22482600 |
| H  | 6. 75733100  | 2. 19037900  | -3. 02928000 |
| H  | 6. 51477700  | -1. 80239500 | -1. 46443000 |
| H  | 7. 90685700  | 0. 13527500  | -2. 20305400 |
| C  | 3. 06063200  | 2. 36305700  | -0. 07242000 |
| C  | 4. 39517400  | 2. 18501400  | 0. 30670900  |
| C  | 2. 63338700  | 3. 63063600  | -0. 48840800 |
| C  | 5. 27667400  | 3. 25932900  | 0. 28784500  |
| H  | 4. 75067800  | 1. 19619600  | 0. 59399700  |
| C  | 3. 51958400  | 4. 69796900  | -0. 51468900 |
| H  | 1. 59693500  | 3. 75681300  | -0. 79835000 |
| C  | 4. 84497900  | 4. 51631900  | -0. 12126200 |
| H  | 6. 31453800  | 3. 10363400  | 0. 57825900  |
| H  | 3. 17456600  | 5. 67845900  | -0. 84034000 |
| H  | 5. 53956000  | 5. 35476400  | -0. 13905200 |
| H  | 2. 18155500  | -1. 52416100 | -1. 50908700 |
| H  | -0. 11624700 | -0. 23000300 | -3. 07300700 |
| C  | 2. 36584700  | -0. 07664200 | 1. 87581700  |
| O  | 2. 59336000  | 0. 08160100  | 0. 55765100  |
| O  | 1. 75297100  | 0. 69863700  | 2. 57464000  |
| C  | 2. 95175400  | -1. 35011500 | 2. 37165400  |

|   |              |              |              |
|---|--------------|--------------|--------------|
| C | 3. 83641800  | -2. 10789100 | 1. 59993600  |
| C | 2. 58556700  | -1. 79026800 | 3. 64592700  |
| C | 4. 32562100  | -3. 31284500 | 2. 09063800  |
| H | 4. 13663800  | -1. 74221100 | 0. 61900600  |
| C | 3. 06727100  | -3. 00115400 | 4. 12763400  |
| H | 1. 92108100  | -1. 16717000 | 4. 24374700  |
| C | 3. 93072400  | -3. 76628800 | 3. 34661100  |
| H | 5. 01372300  | -3. 90352100 | 1. 48781300  |
| H | 2. 77073500  | -3. 34978800 | 5. 11542000  |
| H | 4. 30557900  | -4. 71652900 | 3. 72376700  |
| C | -1. 45083200 | -2. 41395400 | 3. 56705900  |
| H | -1. 09087400 | -2. 38526500 | 4. 60627100  |
| H | -2. 52340500 | -2. 66601100 | 3. 60606400  |
| C | -0. 71837400 | -3. 46056600 | 2. 73128300  |
| H | 0. 36548100  | -3. 27088900 | 2. 78397700  |
| H | -0. 87974900 | -4. 48291800 | 3. 09960800  |
| H | -2. 22954500 | -3. 73873600 | 1. 22817100  |
| C | -2. 05490500 | 0. 12277000  | 3. 23859800  |
| C | -1. 60084400 | 1. 38436900  | 2. 82836800  |
| C | -3. 28406900 | 0. 03017500  | 3. 89334000  |
| C | -2. 37094100 | 2. 51873800  | 3. 05048500  |
| H | -0. 63674200 | 1. 46954900  | 2. 31943700  |
| C | -4. 05492600 | 1. 17000400  | 4. 11727900  |
| H | -3. 64930300 | -0. 93833100 | 4. 23588300  |
| C | -3. 60610000 | 2. 41442500  | 3. 68796100  |
| H | -2. 00892200 | 3. 48868400  | 2. 70928600  |
| H | -5. 01209400 | 1. 07980200  | 4. 62979400  |
| H | -4. 21012900 | 3. 30590300  | 3. 85368600  |
| C | -3. 54531200 | 2. 82074900  | -2. 52619000 |
| H | -4. 14656600 | 3. 72004500  | -2. 72118400 |
| H | -2. 54026800 | 3. 00731200  | -2. 94342800 |
| C | -4. 14908500 | 1. 56225100  | -3. 13381900 |
| H | -2. 36601900 | 0. 38257500  | -3. 29606800 |
| H | -5. 17774400 | 1. 45221600  | -2. 75620600 |
| H | -4. 21502400 | 1. 60575500  | -4. 22973100 |
| C | -2. 75981700 | 3. 64421200  | -0. 23160600 |
| C | -3. 55218000 | 4. 60069400  | 0. 40887200  |
| C | -1. 36959800 | 3. 74903400  | -0. 13297000 |
| C | -2. 97640800 | 5. 63986900  | 1. 13213300  |
| H | -4. 63889200 | 4. 52206400  | 0. 34166800  |
| C | -0. 79186900 | 4. 77837400  | 0. 60420200  |
| H | -0. 72750000 | 2. 99661300  | -0. 59477200 |
| C | -1. 59097500 | 5. 72832300  | 1. 23557600  |
| H | -3. 61120300 | 6. 37534600  | 1. 62453600  |



|   |             |             |             |
|---|-------------|-------------|-------------|
| H | 0.29285800  | 4.82579400  | 0.70052900  |
| H | -1.13408900 | 6.53050700  | 1.81301700  |
| C | -3.87691100 | -0.99405100 | -2.73919100 |
| C | -3.05648700 | -2.08386000 | -3.05400700 |
| C | -5.21724300 | -1.24875000 | -2.42723000 |
| C | -3.55322400 | -3.38226400 | -3.04562100 |
| H | -2.01050000 | -1.90651300 | -3.30964800 |
| C | -5.71493600 | -2.54793100 | -2.41272900 |
| H | -5.88895100 | -0.42289700 | -2.19227500 |
| C | -4.88445200 | -3.62195400 | -2.71717200 |
| H | -2.89351900 | -4.21000300 | -3.30252700 |
| H | -6.76189700 | -2.72022100 | -2.16709600 |
| H | -5.27613600 | -4.63775100 | -2.71141000 |
| C | -0.37791400 | -3.93187900 | 0.19839700  |
| C | 1.00770200  | -3.75235000 | 0.15283200  |
| C | -0.99319500 | -4.62914100 | -0.84350900 |
| C | 1.75582700  | -4.26619600 | -0.89940300 |
| H | 1.51166300  | -3.19251500 | 0.94317300  |
| C | -0.24631500 | -5.13942100 | -1.90213200 |
| H | -2.07674900 | -4.76782500 | -0.82394300 |
| C | 1.13241400  | -4.95992300 | -1.93408800 |
| H | 2.83707100  | -4.12458800 | -0.91245200 |
| H | -0.74309600 | -5.68777400 | -2.70213900 |
| H | 1.71962300  | -5.35865000 | -2.75928200 |

### TS3\_a2

|    |             |             |             |
|----|-------------|-------------|-------------|
| C  | -3.87490400 | -0.23996700 | 0.99669900  |
| C  | -3.27174100 | -1.62409600 | 1.24293700  |
| H  | -4.96430100 | -0.31689000 | 0.85327400  |
| H  | -3.71412400 | 0.39819700  | 1.87973500  |
| H  | -3.53026900 | -1.96721800 | 2.25673700  |
| H  | -3.69905500 | -2.35474400 | 0.53955600  |
| P  | -1.43238900 | -1.70049700 | 0.96391300  |
| P  | -3.12131400 | 0.71593500  | -0.41229500 |
| C  | -0.16485200 | 0.38861000  | -2.69527700 |
| C  | 1.02114300  | 1.08666900  | -2.52173300 |
| H  | -1.02065100 | 0.93302300  | -3.10318400 |
| C  | 2.05680900  | 0.65614200  | 0.03589000  |
| C  | 2.28814500  | 0.54034400  | -2.20276000 |
| Cu | -0.88730200 | 0.07864300  | -0.67214500 |
| O  | 0.94440000  | 0.14569600  | 0.25390100  |
| C  | -0.69639900 | -1.18642900 | 2.62459600  |
| C  | -1.09970500 | -3.53610000 | 1.27281400  |

|   |              |              |              |
|---|--------------|--------------|--------------|
| H | -2. 06987600 | -3. 99049200 | 1. 53624200  |
| C | -4. 07786000 | 2. 33811200  | -0. 25919800 |
| H | -4. 68610800 | 2. 24008200  | 0. 65515000  |
| C | -4. 12826600 | 0. 14352900  | -1. 90363300 |
| C | 2. 37256300  | -0. 96023500 | -2. 31657700 |
| H | 3. 27843400  | -1. 37693700 | -1. 86385600 |
| H | 2. 33679800  | -1. 28914700 | -3. 36883200 |
| H | 1. 52130600  | -1. 42260000 | -1. 79967400 |
| C | 3. 50508100  | 1. 33074600  | -2. 48742700 |
| C | 4. 75041600  | 0. 70475200  | -2. 67376500 |
| C | 3. 50186500  | 2. 73722500  | -2. 54870800 |
| C | 5. 91722700  | 1. 43276700  | -2. 87915300 |
| H | 4. 81439400  | -0. 38162100 | -2. 67348200 |
| C | 4. 66364100  | 3. 46519000  | -2. 76312200 |
| H | 2. 57650400  | 3. 28993600  | -2. 38851400 |
| C | 5. 88719600  | 2. 82188300  | -2. 92379400 |
| H | 6. 85930400  | 0. 90218100  | -3. 01701300 |
| H | 4. 60916000  | 4. 55337500  | -2. 78717300 |
| H | 6. 79960200  | 3. 39314500  | -3. 08670100 |
| H | 0. 93884300  | 2. 17773400  | -2. 55704900 |
| H | -0. 13026300 | -0. 67435100 | -2. 95253800 |
| C | -0. 19460700 | -3. 55857000 | 2. 51780900  |
| C | -0. 67607700 | -2. 46352900 | 3. 45816400  |
| H | 0. 34461700  | -0. 93090900 | 2. 36857300  |
| C | -1. 35484700 | 0. 04300800  | 3. 17535000  |
| C | -2. 40275700 | 0. 00900400  | 4. 09816600  |
| C | -0. 94954300 | 1. 28861500  | 2. 67636800  |
| C | -3. 06158700 | 1. 18081700  | 4. 46926800  |
| H | -2. 72068500 | -0. 93949400 | 4. 53166500  |
| C | -1. 61609500 | 2. 45480900  | 3. 02823300  |
| H | -0. 09672500 | 1. 31891700  | 1. 99775500  |
| C | -2. 68665800 | 2. 40385300  | 3. 92094400  |
| H | -3. 87688700 | 1. 13328400  | 5. 19042600  |
| H | -1. 28893300 | 3. 40832900  | 2. 60938500  |
| H | -3. 20944000 | 3. 31657500  | 4. 20514500  |
| C | -0. 52902300 | -4. 25306800 | 0. 08497800  |
| C | -1. 10497800 | -5. 43533200 | -0. 38033900 |
| C | 0. 60029600  | -3. 75438700 | -0. 57372500 |
| C | -0. 57552500 | -6. 10481400 | -1. 48086700 |
| H | -1. 98796000 | -5. 83090600 | 0. 12492600  |
| C | 1. 12862500  | -4. 41617300 | -1. 67542100 |
| H | 1. 06565200  | -2. 82938800 | -0. 22029200 |
| C | 0. 54091900  | -5. 59384200 | -2. 13487400 |
| H | -1. 03941400 | -7. 02699300 | -1. 82928500 |

|   |             |             |             |
|---|-------------|-------------|-------------|
| H | 2.00617900  | -4.01002700 | -2.17750000 |
| H | 0.95631900  | -6.11132700 | -2.99811700 |
| C | -5.01306600 | 2.37108100  | -1.48438900 |
| C | -5.42363400 | 0.94415100  | -1.81552400 |
| H | -3.55689300 | 0.51961100  | -2.77069000 |
| C | -4.20154300 | -1.35331800 | -1.99662600 |
| C | -5.33949100 | -2.08015500 | -1.64224000 |
| C | -3.05854500 | -2.06020600 | -2.39196700 |
| C | -5.32334100 | -3.47425200 | -1.65112800 |
| H | -6.25213400 | -1.55961700 | -1.35296100 |
| C | -3.03399900 | -3.44776300 | -2.39015000 |
| H | -2.16375400 | -1.50420100 | -2.67679800 |
| C | -4.16939000 | -4.16191800 | -2.01060900 |
| H | -6.22148200 | -4.02337000 | -1.37134400 |
| H | -2.12327200 | -3.97423300 | -2.67459200 |
| H | -4.15084900 | -5.25100300 | -2.00517800 |
| C | -3.22568100 | 3.56871900  | -0.14392200 |
| C | -3.50397200 | 4.53206600  | 0.82616500  |
| C | -2.17500300 | 3.80181100  | -1.03689800 |
| C | -2.75766000 | 5.70472100  | 0.90223500  |
| H | -4.31692100 | 4.35589000  | 1.53220500  |
| C | -1.42874300 | 4.97122800  | -0.96682100 |
| H | -1.93279800 | 3.04881500  | -1.79160500 |
| C | -1.71999600 | 5.92854800  | 0.00363100  |
| H | -2.98870600 | 6.44617800  | 1.66557800  |
| H | -0.60601600 | 5.13005500  | -1.66363100 |
| H | -1.13458100 | 6.84556700  | 0.05795200  |
| C | 2.36160300  | 2.07679000  | 0.31174900  |
| C | 3.66878300  | 2.53308700  | 0.50811200  |
| C | 1.30405900  | 2.99081600  | 0.38856100  |
| C | 3.91000100  | 3.87257200  | 0.79121000  |
| H | 4.50227100  | 1.83661100  | 0.42439900  |
| C | 1.54927900  | 4.32730900  | 0.67187000  |
| H | 0.28254100  | 2.64109900  | 0.22857400  |
| C | 2.85434100  | 4.77306200  | 0.87533100  |
| H | 4.93410900  | 4.21324600  | 0.93585900  |
| H | 0.71134200  | 5.02078900  | 0.74224100  |
| H | 3.04555900  | 5.82134100  | 1.10072800  |
| O | 3.19676700  | -0.17873900 | 0.24971500  |
| C | 3.36459700  | -0.71478200 | 1.47626800  |
| O | 2.60950600  | -0.56229200 | 2.41022700  |
| C | 4.61307100  | -1.51594800 | 1.55043300  |
| C | 5.56796500  | -1.50538500 | 0.53142700  |
| C | 4.83031100  | -2.27452900 | 2.70264800  |

|   |             |             |             |
|---|-------------|-------------|-------------|
| C | 6.72942800  | -2.25672400 | 0.66573400  |
| H | 5.39894300  | -0.89188700 | -0.35156200 |
| C | 5.98764800  | -3.02976500 | 2.82966800  |
| H | 4.07644800  | -2.25163300 | 3.48726700  |
| C | 6.93766200  | -3.02110300 | 1.81069900  |
| H | 7.47733400  | -2.24334100 | -0.12516000 |
| H | 6.15460700  | -3.62420100 | 3.72621900  |
| H | 7.84785600  | -3.61054600 | 1.91120300  |
| H | -0.19546400 | -4.55615000 | 2.97882800  |
| H | 0.84376500  | -3.34315200 | 2.21586100  |
| H | -1.68170600 | -2.71944600 | 3.83136900  |
| H | -0.02354500 | -2.35107900 | 4.33574800  |
| H | -5.87140300 | 3.03067900  | -1.29689000 |
| H | -4.46422700 | 2.80200300  | -2.33716900 |
| H | -6.06700700 | 0.55338700  | -1.01088100 |
| H | -6.00363200 | 0.87945100  | -2.74761600 |

### TS3\_a3

|    |             |             |             |
|----|-------------|-------------|-------------|
| C  | -3.82015200 | 0.39756100  | 0.76980200  |
| C  | -3.45336100 | 1.69934600  | 0.06356500  |
| H  | -4.35772300 | -0.26991600 | 0.07456700  |
| H  | -4.49683800 | 0.59327900  | 1.61610100  |
| H  | -3.08206200 | 2.43900000  | 0.79227600  |
| H  | -4.34273600 | 2.13471900  | -0.41711200 |
| P  | -2.06083000 | 1.52145200  | -1.15541300 |
| P  | -2.35636600 | -0.61258000 | 1.32734000  |
| C  | -0.44636500 | -1.82496800 | -1.81080300 |
| C  | 0.77310400  | -2.30067700 | -1.35782500 |
| H  | -1.33628600 | -2.42789000 | -1.60984300 |
| C  | 2.16752000  | -0.36803200 | 0.16586600  |
| C  | 2.05990100  | -1.77531200 | -1.63543700 |
| Cu | -0.77131000 | -0.30734400 | -0.33274900 |
| O  | 1.13942200  | 0.31903200  | 0.02965300  |
| C  | -1.78215700 | 3.30957400  | -1.63785300 |
| H  | -2.73216500 | 3.83224200  | -1.42510800 |
| C  | -2.82613000 | 1.08490900  | -2.84054300 |
| C  | -1.99754500 | -0.05100600 | 3.08522700  |
| H  | -0.97752600 | -0.42527700 | 3.27921400  |
| C  | -3.22404500 | -2.19198500 | 1.88745600  |
| H  | -4.30193100 | -1.99657200 | 1.76256900  |
| C  | 2.10333400  | -0.69749400 | -2.68776800 |
| H  | 3.06629300  | -0.17817400 | -2.72440500 |
| H  | 1.89561400  | -1.09800300 | -3.69401300 |

|   |              |              |              |
|---|--------------|--------------|--------------|
| H | 1. 34514300  | 0. 07060100  | -2. 47176800 |
| C | 3. 23277700  | -2. 65422000 | -1. 47480700 |
| C | 4. 42826600  | -2. 41163700 | -2. 17802800 |
| C | 3. 24378000  | -3. 75571300 | -0. 59612300 |
| C | 5. 56417500  | -3. 19098800 | -1. 99055600 |
| H | 4. 47042100  | -1. 60232800 | -2. 90458000 |
| C | 4. 37369900  | -4. 54184300 | -0. 41750400 |
| H | 2. 35702100  | -3. 99509100 | -0. 00804700 |
| C | 5. 55112100  | -4. 26353300 | -1. 10488700 |
| H | 6. 46681800  | -2. 95959400 | -2. 55649700 |
| H | 4. 33324000  | -5. 37560000 | 0. 28351400  |
| H | 6. 43919400  | -4. 87608300 | -0. 95894500 |
| H | 0. 70862000  | -3. 13704900 | -0. 65641600 |
| H | -0. 49151700 | -1. 19393000 | -2. 70214800 |
| O | 3. 38618500  | 0. 20226900  | -0. 29711700 |
| C | 2. 39521900  | -1. 31947000 | 1. 27276200  |
| C | 3. 66671000  | -1. 80951000 | 1. 58830000  |
| C | 1. 30367100  | -1. 73772100 | 2. 04163500  |
| C | 3. 83829600  | -2. 68684000 | 2. 65446400  |
| H | 4. 52739200  | -1. 51527600 | 0. 98822100  |
| C | 1. 47545100  | -2. 62006400 | 3. 09825100  |
| H | 0. 31525900  | -1. 35485700 | 1. 78812900  |
| C | 2. 74790100  | -3. 09812700 | 3. 41133100  |
| H | 4. 83537900  | -3. 06102900 | 2. 88154900  |
| H | 0. 61526600  | -2. 92605100 | 3. 69642400  |
| H | 2. 88503400  | -3. 78688900 | 4. 24336000  |
| C | 3. 86940000  | 1. 25072300  | 0. 40369100  |
| C | 5. 18493900  | 1. 69520400  | -0. 12098600 |
| C | 5. 69787200  | 2. 90533300  | 0. 35135300  |
| C | 5. 91885000  | 0. 93416400  | -1. 03436400 |
| C | 6. 92600500  | 3. 36473500  | -0. 10328600 |
| H | 5. 11662800  | 3. 46758000  | 1. 08046700  |
| C | 7. 15455900  | 1. 39175200  | -1. 47610000 |
| H | 5. 52639000  | -0. 02161300 | -1. 37971600 |
| C | 7. 65462500  | 2. 60757800  | -1. 01778000 |
| H | 7. 32086200  | 4. 31225300  | 0. 25939900  |
| H | 7. 73133200  | 0. 79519900  | -2. 18089700 |
| H | 8. 62031000  | 2. 96586400  | -1. 37175200 |
| O | 3. 30437100  | 1. 76059400  | 1. 34380200  |
| C | -1. 64723600 | 3. 22381500  | -3. 16236300 |
| H | -1. 62327900 | 4. 22699600  | -3. 61045200 |
| H | -0. 69314400 | 2. 73209300  | -3. 41985700 |
| C | -2. 82899200 | 2. 39190100  | -3. 64320700 |
| H | -3. 75238000 | 2. 96088200  | -3. 45391400 |

|   |             |             |             |
|---|-------------|-------------|-------------|
| H | -2.79718000 | 2.18817600  | -4.72229900 |
| H | -2.07018200 | 0.41746900  | -3.28501900 |
| C | -2.93445100 | -2.28179000 | 3.39354400  |
| C | -2.96187600 | -0.86035200 | 3.94802400  |
| H | -2.68480900 | -0.81945600 | 5.01113800  |
| H | -3.98604900 | -0.46040100 | 3.86823200  |
| H | -3.65716900 | -2.94357100 | 3.88966100  |
| H | -1.93791300 | -2.71994000 | 3.56405000  |
| C | -0.67307600 | 4.03499200  | -0.93084600 |
| C | -0.88868200 | 5.35034600  | -0.51054800 |
| C | 0.57866000  | 3.45232500  | -0.70685300 |
| C | 0.12103500  | 6.07936900  | 0.10807400  |
| H | -1.86713100 | 5.80691800  | -0.67117600 |
| C | 1.58891100  | 4.18007400  | -0.08467400 |
| H | 0.76195000  | 2.41083800  | -0.98028600 |
| C | 1.36545100  | 5.49413000  | 0.31998500  |
| H | -0.06702200 | 7.10350100  | 0.42826800  |
| H | 2.54956300  | 3.70630400  | 0.10861800  |
| H | 2.15900800  | 6.05581300  | 0.81071900  |
| C | -4.11074300 | 0.31836000  | -2.73079000 |
| C | -4.07806500 | -1.08100200 | -2.69588100 |
| C | -5.35262200 | 0.94955100  | -2.60076400 |
| C | -5.24349800 | -1.82277500 | -2.53661200 |
| H | -3.11996900 | -1.59387400 | -2.80016600 |
| C | -6.51910600 | 0.20968600  | -2.43529300 |
| H | -5.41667000 | 2.03751500  | -2.63035300 |
| C | -6.47100400 | -1.18043700 | -2.40090900 |
| H | -5.18785100 | -2.91066400 | -2.52695300 |
| H | -7.47384800 | 0.72466900  | -2.33822700 |
| H | -7.38549100 | -1.75863800 | -2.28016900 |
| C | -2.84831100 | -3.36548900 | 1.03016600  |
| C | -3.75147400 | -3.84234100 | 0.07820500  |
| C | -1.57939500 | -3.95058300 | 1.09311900  |
| C | -3.40262900 | -4.87529700 | -0.78759400 |
| H | -4.74249900 | -3.38799400 | 0.01322800  |
| C | -1.23001500 | -4.98641800 | 0.23472700  |
| H | -0.83809300 | -3.58072800 | 1.80387200  |
| C | -2.13946700 | -5.45227500 | -0.71184100 |
| H | -4.12468400 | -5.23640000 | -1.51962500 |
| H | -0.23505600 | -5.42673800 | 0.30209700  |
| H | -1.86264300 | -6.26058400 | -1.38607700 |
| C | -1.96802300 | 1.44558000  | 3.17364100  |
| C | -3.01838500 | 2.19126700  | 3.71104200  |
| C | -0.87081800 | 2.12377800  | 2.62266100  |

|   |             |            |            |
|---|-------------|------------|------------|
| C | -2.98394800 | 3.58439100 | 3.68524300 |
| H | -3.87333500 | 1.68598600 | 4.16068300 |
| C | -0.83947700 | 3.51203000 | 2.59378500 |
| H | -0.03800800 | 1.55915800 | 2.19120500 |
| C | -1.90045200 | 4.24749300 | 3.11984100 |
| H | -3.81102000 | 4.15044600 | 4.11212300 |
| H | 0.01602600  | 4.01892300 | 2.14785600 |
| H | -1.87484300 | 5.33610800 | 3.09078100 |

**TS3\_a4**

|    |             |             |             |
|----|-------------|-------------|-------------|
| C  | -3.04071300 | 2.35745600  | 0.33592300  |
| C  | -3.70109100 | 1.11750600  | 0.93248300  |
| H  | -3.80480300 | 3.03759100  | -0.07272300 |
| H  | -2.50550500 | 2.91603500  | 1.11895100  |
| H  | -4.18823400 | 1.37094100  | 1.88648200  |
| H  | -4.49034400 | 0.75049700  | 0.25937900  |
| P  | -2.55434600 | -0.33161000 | 1.14757700  |
| P  | -1.74538500 | 2.02098700  | -0.95509200 |
| C  | -0.28044400 | -1.12550800 | -2.31999600 |
| C  | 1.07884300  | -1.35021600 | -2.18698900 |
| H  | -0.58955500 | -0.34107100 | -3.01521800 |
| C  | 1.83608100  | -1.30593000 | 0.46944500  |
| C  | 1.71416500  | -2.42570600 | -1.52157300 |
| Cu | -0.73777400 | -0.05020100 | -0.49224800 |
| O  | 0.66240200  | -0.96218000 | 0.70219500  |
| C  | -1.82448500 | -0.09160900 | 2.87454300  |
| C  | -3.78749800 | -1.63686500 | 1.73863100  |
| H  | -4.76517300 | -1.13035300 | 1.80985400  |
| C  | -1.20701800 | 3.79281200  | -1.32117400 |
| H  | -1.90236300 | 4.43401600  | -0.75363100 |
| C  | -2.73375400 | 1.88169200  | -2.56844700 |
| C  | 0.80297200  | -3.54749100 | -1.10097900 |
| H  | 1.25482100  | -4.22269900 | -0.36585200 |
| H  | 0.48288800  | -4.15663300 | -1.96296000 |
| H  | -0.10067800 | -3.13350300 | -0.63472400 |
| C  | 3.10822700  | -2.76227500 | -1.87588300 |
| C  | 3.69017000  | -3.97652600 | -1.46879400 |
| C  | 3.93995200  | -1.89876100 | -2.61636700 |
| C  | 5.01691400  | -4.28877900 | -1.74630600 |
| H  | 3.10383600  | -4.69503700 | -0.89957600 |
| C  | 5.26706200  | -2.20191600 | -2.88344300 |
| H  | 3.54595600  | -0.95969000 | -3.00172000 |
| C  | 5.82442600  | -3.40158600 | -2.44597100 |

|   |              |              |              |
|---|--------------|--------------|--------------|
| H | 5. 42068800  | -5. 23931400 | -1. 39803800 |
| H | 5. 87008700  | -1. 49423600 | -3. 45385500 |
| H | 6. 86434800  | -3. 64245100 | -2. 66004100 |
| C | 2. 50289800  | -2. 37096900 | 1. 24483500  |
| C | 3. 88728100  | -2. 56893700 | 1. 21479000  |
| C | 1. 71262000  | -3. 22009300 | 2. 02970600  |
| C | 4. 46511400  | -3. 59639400 | 1. 95175600  |
| H | 4. 51538200  | -1. 92304400 | 0. 60199800  |
| C | 2. 29154100  | -4. 25172400 | 2. 75405800  |
| H | 0. 63690200  | -3. 05064800 | 2. 06067400  |
| C | 3. 67199100  | -4. 44418100 | 2. 71678200  |
| H | 5. 54392400  | -3. 74003800 | 1. 91319500  |
| H | 1. 66529800  | -4. 90429300 | 3. 36086300  |
| H | 4. 12714000  | -5. 25226500 | 3. 28750900  |
| H | 1. 71996300  | -0. 55045200 | -2. 56624200 |
| H | -0. 98986700 | -1. 94906300 | -2. 19737400 |
| C | 3. 23088200  | 0. 54528100  | 0. 91789100  |
| O | 2. 75562200  | -0. 31791800 | -0. 01148200 |
| O | 2. 77247300  | 0. 66711300  | 2. 03022500  |
| C | 4. 40962700  | 1. 30473900  | 0. 43205400  |
| C | 5. 04848600  | 0. 99072900  | -0. 76795800 |
| C | 4. 89360400  | 2. 34308500  | 1. 23044000  |
| C | 6. 15701500  | 1. 72373500  | -1. 17566900 |
| H | 4. 67514000  | 0. 16317200  | -1. 36547700 |
| C | 5. 99829900  | 3. 07634400  | 0. 81866800  |
| H | 4. 38239900  | 2. 56068700  | 2. 16675800  |
| C | 6. 62772000  | 2. 77058900  | -0. 38723700 |
| H | 6. 65804600  | 1. 47251800  | -2. 10950200 |
| H | 6. 37343800  | 3. 88875900  | 1. 43922500  |
| H | 7. 49528000  | 3. 34583600  | -0. 70745900 |
| C | -3. 32147100 | -1. 98902900 | 3. 16252900  |
| C | -2. 85090300 | -0. 70166500 | 3. 82427600  |
| H | -0. 93356900 | -0. 74167100 | 2. 86023100  |
| C | -1. 36461200 | 1. 32215600  | 3. 08261000  |
| C | -2. 13760500 | 2. 29719500  | 3. 71690100  |
| C | -0. 13115900 | 1. 69550600  | 2. 53466000  |
| C | -1. 70233300 | 3. 62152500  | 3. 76741300  |
| H | -3. 08846700 | 2. 02977700  | 4. 17930000  |
| C | 0. 29910600  | 3. 01489500  | 2. 57620600  |
| H | 0. 50239700  | 0. 93175600  | 2. 08389200  |
| C | -0. 49346900 | 3. 98800900  | 3. 18316900  |
| H | -2. 31584300 | 4. 36988700  | 4. 26806800  |
| H | 1. 26031400  | 3. 27698000  | 2. 13094300  |
| H | -0. 15963300 | 5. 02493000  | 3. 21222000  |



|   |             |             |             |
|---|-------------|-------------|-------------|
| C | -3.92176200 | -2.82454200 | 0.83029100  |
| C | -5.17866600 | -3.34779800 | 0.52416500  |
| C | -2.79114500 | -3.44523500 | 0.29173900  |
| C | -5.30672500 | -4.45751000 | -0.30723100 |
| H | -6.06916400 | -2.86944200 | 0.93633100  |
| C | -2.91287600 | -4.54635400 | -0.54687800 |
| H | -1.80159500 | -3.04424300 | 0.52575100  |
| C | -4.17398500 | -5.05551200 | -0.85132200 |
| H | -6.29603000 | -4.85223900 | -0.53514700 |
| H | -2.01793100 | -5.00646100 | -0.96491000 |
| H | -4.27127600 | -5.91742100 | -1.50928900 |
| C | -1.51193700 | 3.97851800  | -2.81447600 |
| C | -2.85528800 | 3.31505600  | -3.08039000 |
| H | -2.05007800 | 1.34303800  | -3.24611800 |
| C | -3.97793100 | 1.05629400  | -2.40890800 |
| C | -5.24497900 | 1.61523300  | -2.22528300 |
| C | -3.85911900 | -0.33887400 | -2.36586200 |
| C | -6.35079400 | 0.80526800  | -1.97123000 |
| H | -5.37920400 | 2.69560900  | -2.27416800 |
| C | -4.95706100 | -1.14867800 | -2.10976000 |
| H | -2.87947000 | -0.79479700 | -2.51173400 |
| C | -6.20990200 | -0.57676500 | -1.89921100 |
| H | -7.32883400 | 1.26291900  | -1.82767900 |
| H | -4.83016400 | -2.22985900 | -2.06323500 |
| H | -7.07181500 | -1.20926500 | -1.69015200 |
| C | 0.19414400  | 4.13874900  | -0.91641600 |
| C | 0.42920600  | 5.25539200  | -0.11355200 |
| C | 1.28774700  | 3.38420000  | -1.35335800 |
| C | 1.72380600  | 5.62012400  | 0.24409600  |
| H | -0.41930700 | 5.84700700  | 0.23421600  |
| C | 2.58248000  | 3.75055700  | -1.00674200 |
| H | 1.11952200  | 2.50019900  | -1.97408400 |
| C | 2.80398500  | 4.86897200  | -0.20418100 |
| H | 1.88681600  | 6.49517800  | 0.87206300  |
| H | 3.42805600  | 3.15983300  | -1.35742800 |
| H | 3.82112900  | 5.14761600  | 0.06728600  |
| H | -4.12462600 | -2.49230100 | 3.71911300  |
| H | -2.48233600 | -2.70163400 | 3.10013300  |
| H | -3.71323200 | -0.02875500 | 3.95825000  |
| H | -2.42125100 | -0.87249800 | 4.82179700  |
| H | -3.63621600 | 3.86208700  | -2.52810800 |
| H | -3.13911100 | 3.33789600  | -4.14224900 |
| H | -1.50030100 | 5.04416900  | -3.08193200 |
| H | -0.72619100 | 3.49035900  | -3.41430400 |

**TS3\_b1**

|    |             |             |             |
|----|-------------|-------------|-------------|
| C  | 2.70351900  | -1.94828900 | 0.86408000  |
| C  | 1.56966200  | -2.97963400 | 0.84393500  |
| H  | 3.34165100  | -2.07587700 | -0.01864800 |
| H  | 3.33365400  | -2.10403700 | 1.74779900  |
| H  | 1.08578100  | -3.02889000 | 1.82648400  |
| H  | 1.97827100  | -3.97457800 | 0.63317500  |
| P  | 0.19768700  | -2.57113600 | -0.33813000 |
| P  | 2.13214300  | -0.18186800 | 0.79059400  |
| C  | 0.18550500  | 0.53501800  | -2.58078900 |
| C  | -0.51208400 | 1.72542800  | -2.39802800 |
| H  | 1.25914500  | 0.64003400  | -2.72501400 |
| C  | -1.96528900 | 1.75026900  | 0.00653800  |
| C  | -1.88539800 | 2.03950100  | -2.37238700 |
| Cu | 0.22060000  | -0.18121800 | -0.52882700 |
| O  | -1.59201700 | 0.58128500  | 0.15415000  |
| C  | -1.01740100 | -3.93537900 | 0.07047600  |
| H  | -0.43705700 | -4.69439000 | 0.61333500  |
| C  | 0.67009100  | -3.33678500 | -1.99938000 |
| C  | 1.87691300  | 0.35028700  | 2.57215100  |
| H  | 1.17475100  | 1.18632700  | 2.50903100  |
| C  | 3.77725000  | 0.69847000  | 0.61846900  |
| C  | -2.20912700 | 3.51192500  | -2.52804000 |
| C  | -3.36534400 | 2.18865400  | 0.16145700  |
| C  | -3.69898100 | 3.51666300  | 0.44569300  |
| C  | -4.38621200 | 1.24329000  | 0.01419500  |
| C  | -5.03147800 | 3.88651700  | 0.59606000  |
| H  | -2.91595800 | 4.25998500  | 0.54765200  |
| C  | -5.71489800 | 1.61811900  | 0.15720500  |
| H  | -4.12982400 | 0.22231100  | -0.24036000 |
| C  | -6.04230400 | 2.93969600  | 0.45367400  |
| H  | -5.27821100 | 4.91932500  | 0.82347700  |
| H  | -6.49560800 | 0.87505000  | 0.02581600  |
| H  | -7.08213600 | 3.23126300  | 0.56932000  |
| H  | 0.12715700  | 2.57974400  | -2.16300700 |
| H  | -0.27751000 | -0.29752500 | -3.10781900 |
| C  | -0.55433700 | 2.90820700  | 1.50280500  |
| O  | -1.00527800 | 2.78193500  | 0.23884300  |
| O  | -1.01851900 | 2.32274500  | 2.45350000  |
| C  | 0.60309100  | 3.84319500  | 1.59394600  |
| C  | 1.14801500  | 4.46633600  | 0.47000600  |
| C  | 1.16884700  | 4.05526300  | 2.85421000  |

|   |              |              |              |
|---|--------------|--------------|--------------|
| C | 2. 27063000  | 5. 27678900  | 0. 60283600  |
| H | 0. 69672800  | 4. 30461000  | -0. 50296300 |
| C | 2. 28485000  | 4. 87227200  | 2. 98512100  |
| H | 0. 72480000  | 3. 56401400  | 3. 71407700  |
| C | 2. 84032300  | 5. 47727500  | 1. 85798100  |
| H | 2. 70607200  | 5. 74267100  | -0. 27534400 |
| H | 2. 72776900  | 5. 03224100  | 3. 96328300  |
| H | 3. 72014500  | 6. 10584400  | 1. 95829500  |
| H | -1. 41357400 | 4. 12546300  | -2. 09118100 |
| H | -2. 30620500 | 3. 80454500  | -3. 58346300 |
| H | -3. 14386700 | 3. 78992200  | -2. 02793100 |
| C | -2. 93547900 | 1. 07362500  | -2. 74594300 |
| C | -4. 16374400 | 1. 51749000  | -3. 27090400 |
| C | -2. 82323400 | -0. 31153100 | -2. 50363300 |
| C | -5. 20896500 | 0. 64082200  | -3. 53829400 |
| H | -4. 31471700 | 2. 57329600  | -3. 46660100 |
| C | -3. 87376600 | -1. 18587300 | -2. 75800500 |
| H | -1. 92743300 | -0. 70500800 | -2. 04336900 |
| C | -5. 07607700 | -0. 72057100 | -3. 28268100 |
| H | -6. 13875000 | 1. 03094900  | -3. 94387400 |
| H | -3. 75317100 | -2. 24192200 | -2. 52805800 |
| H | -5. 89361500 | -1. 40604700 | -3. 48620600 |
| C | -1. 36075200 | -4. 54102500 | -1. 30505400 |
| H | -1. 89135100 | -5. 49189300 | -1. 18693300 |
| H | -2. 02508900 | -3. 86272800 | -1. 85697200 |
| C | -0. 03144000 | -4. 70338000 | -2. 04744700 |
| H | 0. 56413300  | -5. 46873100 | -1. 53489500 |
| H | -0. 16786400 | -5. 03709600 | -3. 08158400 |
| H | 0. 17613100  | -2. 68487000 | -2. 73018700 |
| C | -2. 20118700 | -3. 56113600 | 0. 93141500  |
| C | -2. 67418000 | -4. 48899100 | 1. 86465400  |
| C | -2. 84487400 | -2. 32537000 | 0. 83061400  |
| C | -3. 76458800 | -4. 19668300 | 2. 67795400  |
| H | -2. 17443500 | -5. 45056200 | 1. 96128100  |
| C | -3. 93039200 | -2. 02709400 | 1. 65055000  |
| H | -2. 47658300 | -1. 56668300 | 0. 14713600  |
| C | -4. 39614400 | -2. 95981000 | 2. 57354400  |
| H | -4. 11326600 | -4. 93040300 | 3. 39914300  |
| H | -4. 39981700 | -1. 05089900 | 1. 58119700  |
| H | -5. 23863800 | -2. 71913800 | 3. 21528900  |
| C | 2. 15613600  | -3. 26212600 | -2. 24667500 |
| C | 3. 04634900  | -4. 26228200 | -1. 84478000 |
| C | 2. 68570300  | -2. 09156700 | -2. 80273800 |
| C | 4. 42263900  | -4. 08211300 | -1. 96634700 |

|   |             |             |             |
|---|-------------|-------------|-------------|
| H | 2.67202700  | -5.18974800 | -1.42116300 |
| C | 4.05818500  | -1.90379700 | -2.91900500 |
| H | 2.00831700  | -1.31193500 | -3.13426300 |
| C | 4.93491500  | -2.89869500 | -2.49158200 |
| H | 5.09691900  | -4.87061100 | -1.64433500 |
| H | 4.43827700  | -0.97569900 | -3.33501200 |
| H | 6.00816000  | -2.75768400 | -2.57910300 |
| C | 3.23208800  | 0.90915700  | 3.02591000  |
| H | 3.11527100  | 1.56134700  | 3.89852000  |
| H | 3.91845200  | 0.10135500  | 3.31018300  |
| C | 3.81664900  | 1.66035600  | 1.82531800  |
| H | 3.21002300  | 2.54681600  | 1.60662500  |
| H | 4.83964200  | 2.00679100  | 2.00780200  |
| H | 4.55030100  | -0.06597800 | 0.77232600  |
| C | 1.20183600  | -0.74512600 | 3.36013400  |
| C | 1.90558600  | -1.64758600 | 4.16010100  |
| C | -0.17725300 | -0.93233900 | 3.18827300  |
| C | 1.25490300  | -2.72824300 | 4.75415800  |
| H | 2.97208100  | -1.51974200 | 4.32186400  |
| C | -0.82544300 | -2.01211300 | 3.77756400  |
| H | -0.74195500 | -0.23488800 | 2.57374700  |
| C | -0.10902600 | -2.92022100 | 4.55571900  |
| H | 1.82080500  | -3.42138100 | 5.37047300  |
| H | -1.89045300 | -2.14930200 | 3.61889000  |
| H | -0.61543200 | -3.76793500 | 5.00793100  |
| C | 4.01194500  | 1.35205000  | -0.72058700 |
| C | 5.21391600  | 1.15647300  | -1.40257700 |
| C | 3.04432300  | 2.17813100  | -1.29907900 |
| C | 5.44602000  | 1.77035000  | -2.63204000 |
| H | 5.97433000  | 0.50957400  | -0.97103000 |
| C | 3.26932800  | 2.79146300  | -2.52581400 |
| H | 2.09358000  | 2.31724700  | -0.79352700 |
| C | 4.47305100  | 2.58850100  | -3.19873400 |
| H | 6.38814400  | 1.60581500  | -3.14733800 |
| H | 2.49646600  | 3.41721100  | -2.96398800 |
| H | 4.64799500  | 3.06210000  | -4.16009400 |

### TS3\_b2

|   |            |            |            |
|---|------------|------------|------------|
| C | 2.06210600 | 2.88132500 | 0.84297700 |
| C | 0.64208700 | 3.07184700 | 1.37816900 |
| H | 2.53258600 | 3.86068500 | 0.65631600 |
| H | 2.68080900 | 2.37239600 | 1.60004200 |
| H | 0.70580300 | 3.43123500 | 2.41807700 |

|    |             |             |             |
|----|-------------|-------------|-------------|
| H  | 0.12872400  | 3.85969000  | 0.80547200  |
| P  | -0.50043600 | 1.58746200  | 1.26501200  |
| P  | 2.28064200  | 1.82699800  | -0.66312800 |
| C  | 0.94695500  | -0.78241100 | -2.93817400 |
| C  | 0.74283900  | -2.13260000 | -2.67087200 |
| H  | 1.91442000  | -0.50152800 | -3.36434100 |
| C  | -0.21631700 | -2.61170400 | -0.07084800 |
| C  | -0.43560900 | -2.84825800 | -2.35702000 |
| Cu | 1.16703500  | -0.09835000 | -0.92540300 |
| O  | 0.09919800  | -1.41820300 | 0.09645100  |
| C  | -0.06173600 | 0.61237900  | 2.84675100  |
| C  | -2.02534100 | 2.36815900  | 2.09384100  |
| H  | -1.71998400 | 3.36667100  | 2.45060200  |
| C  | 4.14875100  | 1.89004800  | -0.88558400 |
| H  | 4.51345800  | 2.61198500  | -0.13545300 |
| C  | 1.94350300  | 2.94366200  | -2.14018500 |
| C  | -0.34944200 | -4.34223800 | -2.55778100 |
| H  | 1.65749800  | -2.73919900 | -2.61731300 |
| H  | 0.11121700  | -0.15985000 | -3.26936600 |
| C  | -2.28631600 | 1.48663200  | 3.32306100  |
| C  | -0.93540900 | 1.19979500  | 3.95223900  |
| H  | -0.43506400 | -0.39734300 | 2.61916000  |
| C  | 1.41057500  | 0.50412800  | 3.10810300  |
| C  | 2.10835700  | 1.38907100  | 3.93513600  |
| C  | 2.13531500  | -0.50925600 | 2.46558800  |
| C  | 3.49112700  | 1.28977300  | 4.08331900  |
| H  | 1.57343800  | 2.17131900  | 4.47383700  |
| C  | 3.51427300  | -0.60328000 | 2.60113700  |
| H  | 1.58715600  | -1.22811300 | 1.85549600  |
| C  | 4.20174600  | 0.30437400  | 3.40618500  |
| H  | 4.01345600  | 1.98858600  | 4.73604200  |
| H  | 4.05332200  | -1.39939900 | 2.08478800  |
| H  | 5.28293300  | 0.22817400  | 3.51918000  |
| C  | -3.21940500 | 2.52575500  | 1.19882400  |
| C  | -3.81780400 | 1.42250900  | 0.58051600  |
| C  | -3.78308400 | 3.78686400  | 0.99160300  |
| C  | -4.95416500 | 1.57864500  | -0.20638300 |
| H  | -3.39405600 | 0.42271200  | 0.71406400  |
| C  | -4.91271900 | 3.94910700  | 0.19487100  |
| H  | -3.32292700 | 4.65609400  | 1.46537000  |
| C  | -5.50525300 | 2.84269800  | -0.40564200 |
| H  | -5.40495700 | 0.69930900  | -0.66861000 |
| H  | -5.33459500 | 4.94324400  | 0.04897100  |
| H  | -6.39397100 | 2.96259200  | -1.02330500 |

|   |              |              |              |
|---|--------------|--------------|--------------|
| C | 4. 33966600  | 2. 51433600  | -2. 27839300 |
| C | 3. 28796500  | 3. 60535700  | -2. 43386900 |
| H | 1. 73550200  | 2. 23129000  | -2. 95675700 |
| C | 0. 72589800  | 3. 79993400  | -1. 94496400 |
| C | 0. 79735500  | 5. 16528300  | -1. 66606600 |
| C | -0. 53718000 | 3. 19373600  | -1. 99254700 |
| C | -0. 36168900 | 5. 90333700  | -1. 43045700 |
| H | 1. 76406700  | 5. 66757100  | -1. 63456600 |
| C | -1. 69236900 | 3. 92326700  | -1. 74591500 |
| H | -0. 60848200 | 2. 12382600  | -2. 20449800 |
| C | -1. 60637600 | 5. 28557200  | -1. 46271400 |
| H | -0. 28579500 | 6. 96934800  | -1. 22024900 |
| H | -2. 66390600 | 3. 42896700  | -1. 76071600 |
| H | -2. 51086400 | 5. 86155900  | -1. 27227000 |
| C | 4. 85079000  | 0. 57890200  | -0. 67069900 |
| C | 5. 88764200  | 0. 47801100  | 0. 25754500  |
| C | 4. 48878200  | -0. 56729500 | -1. 38648200 |
| C | 6. 54188400  | -0. 73171200 | 0. 47434800  |
| H | 6. 17838700  | 1. 36153400  | 0. 82797200  |
| C | 5. 13637800  | -1. 77832000 | -1. 17256200 |
| H | 3. 67279300  | -0. 51802800 | -2. 10992100 |
| C | 6. 16627200  | -1. 86591200 | -0. 23764100 |
| H | 7. 34505700  | -0. 78756800 | 1. 20805300  |
| H | 4. 83104800  | -2. 65796400 | -1. 73977500 |
| H | 6. 67395200  | -2. 81467700 | -0. 06930100 |
| C | 0. 71609200  | -3. 72377400 | 0. 18987000  |
| C | 0. 27008500  | -5. 01026200 | 0. 50507100  |
| C | 2. 09349800  | -3. 47602500 | 0. 13246300  |
| C | 1. 18311700  | -6. 03304900 | 0. 73325800  |
| H | -0. 79837300 | -5. 20440900 | 0. 57058800  |
| C | 3. 00171800  | -4. 49999200 | 0. 36016800  |
| H | 2. 44877300  | -2. 46784900 | -0. 08894000 |
| C | 2. 54990500  | -5. 78525000 | 0. 65576200  |
| H | 0. 82288600  | -7. 03087800 | 0. 97854100  |
| H | 4. 07046700  | -4. 28829100 | 0. 31991000  |
| H | 3. 26354600  | -6. 58775200 | 0. 83522100  |
| O | -1. 57991500 | -2. 92671200 | 0. 16268800  |
| C | -2. 07546600 | -2. 53353500 | 1. 36479600  |
| O | -1. 38942300 | -2. 37797700 | 2. 34986500  |
| C | -3. 53949700 | -2. 31593700 | 1. 33235300  |
| C | -4. 28026500 | -2. 42054500 | 0. 15325900  |
| C | -4. 16678500 | -1. 93247100 | 2. 52259100  |
| C | -5. 64060700 | -2. 13343400 | 0. 16773600  |
| H | -3. 78598200 | -2. 71579400 | -0. 77001700 |

|   |             |             |             |
|---|-------------|-------------|-------------|
| C | -5.52294400 | -1.64017800 | 2.52962400  |
| H | -3.56542600 | -1.86422800 | 3.42799700  |
| C | -6.25994900 | -1.73833200 | 1.35035400  |
| H | -6.21299800 | -2.20860800 | -0.75624400 |
| H | -6.00914600 | -1.33300400 | 3.45377400  |
| H | -7.32326400 | -1.50273000 | 1.35505800  |
| C | -1.75875900 | -2.22941700 | -2.59823700 |
| C | -2.79489000 | -2.95958400 | -3.20630200 |
| C | -2.05396000 | -0.90049200 | -2.23572100 |
| C | -4.03071300 | -2.38412800 | -3.48788600 |
| H | -2.63101700 | -3.99762400 | -3.48846000 |
| C | -3.28377900 | -0.32451500 | -2.52192000 |
| H | -1.32624700 | -0.31844400 | -1.67258600 |
| C | -4.28160400 | -1.05570400 | -3.16134700 |
| H | -4.79925300 | -2.98229300 | -3.97729700 |
| H | -3.46773800 | 0.70733400  | -2.22239400 |
| H | -5.24346300 | -0.59725500 | -3.39063600 |
| H | -1.09577900 | -4.88105000 | -1.95521000 |
| H | -0.51504500 | -4.62904200 | -3.60884900 |
| H | 0.63975100  | -4.72401600 | -2.27287300 |
| H | -2.98929000 | 1.97608600  | 4.01242300  |
| H | -2.75673700 | 0.54052200  | 3.00392700  |
| H | -0.51327600 | 2.14514600  | 4.33132600  |
| H | -1.00233400 | 0.51163700  | 4.80749100  |
| H | 5.36488600  | 2.89061700  | -2.39667500 |
| H | 4.19218900  | 1.74187300  | -3.05122700 |
| H | 3.30048000  | 4.06709500  | -3.43139500 |
| H | 3.49389100  | 4.40685900  | -1.70588500 |

### TS3\_b3

|   |             |             |             |
|---|-------------|-------------|-------------|
| C | -3.39280200 | 1.41165500  | 0.97461100  |
| C | -2.53010500 | 2.60962000  | 0.59313400  |
| H | -4.19534500 | 1.27230400  | 0.23390100  |
| H | -3.87907800 | 1.58599800  | 1.94683900  |
| H | -1.93650200 | 2.94492400  | 1.45962500  |
| H | -3.16913600 | 3.45469900  | 0.29190200  |
| P | -1.26337700 | 2.25976700  | -0.72244100 |
| P | -2.49435000 | -0.21684000 | 1.01183100  |
| C | -0.10789100 | -0.85484100 | -2.38206200 |
| C | 0.49443700  | -2.02162900 | -1.93507500 |
| H | -1.12796200 | -0.95388700 | -2.76409100 |
| C | 1.75841200  | -1.68013200 | 0.58224400  |
| C | 1.84198500  | -2.34472400 | -1.62075500 |

|    |             |             |             |
|----|-------------|-------------|-------------|
| Cu | -0.63623200 | -0.02878200 | -0.48423400 |
| O  | 1.02311900  | -0.66959000 | 0.57768600  |
| C  | -0.45470500 | 3.95820100  | -0.84734500 |
| H  | -1.13611000 | 4.65213300  | -0.32616900 |
| C  | -2.17601400 | 2.46360300  | -2.37821500 |
| C  | -1.86499800 | -0.36680500 | 2.79113900  |
| H  | -1.03347900 | -1.08670200 | 2.70997500  |
| C  | -3.96414500 | -1.35984500 | 1.32316700  |
| C  | 2.10379400  | -3.84029400 | -1.62923100 |
| H  | -0.20523700 | -2.84550000 | -1.74368000 |
| H  | 0.48687600  | -0.05390700 | -2.83005000 |
| O  | 3.10954600  | -1.30165900 | 0.81856700  |
| C  | 1.28378500  | -2.96612400 | 1.16347100  |
| C  | -0.09148900 | -3.22046100 | 1.07926100  |
| C  | 2.09514100  | -3.91788200 | 1.78390800  |
| C  | -0.63574500 | -4.41037300 | 1.53783000  |
| H  | -0.72187400 | -2.46031600 | 0.61940000  |
| C  | 1.54539200  | -5.10419300 | 2.26364400  |
| H  | 3.16303400  | -3.75188300 | 1.86888800  |
| C  | 0.18710800  | -5.36565800 | 2.13265400  |
| H  | -1.70462100 | -4.59683800 | 1.42210100  |
| H  | 2.19703200  | -5.83557300 | 2.73932200  |
| H  | -0.23075100 | -6.30345400 | 2.49522800  |
| C  | 4.28016200  | -1.87643800 | 0.47771100  |
| C  | 5.37222700  | -0.87045900 | 0.45578400  |
| C  | 5.16561300  | 0.46558400  | 0.80314300  |
| C  | 6.63845500  | -1.29691800 | 0.05219800  |
| C  | 6.22405400  | 1.36420700  | 0.74819300  |
| H  | 4.17073500  | 0.78957300  | 1.10461200  |
| C  | 7.69205400  | -0.39480400 | -0.00875600 |
| H  | 6.77087800  | -2.34278700 | -0.21789600 |
| C  | 7.48473400  | 0.93766500  | 0.33873300  |
| H  | 6.06458500  | 2.40624200  | 1.02544300  |
| H  | 8.67669800  | -0.72935500 | -0.33086800 |
| H  | 8.30993700  | 1.64701200  | 0.29171200  |
| O  | 4.45764700  | -3.05254800 | 0.25294800  |
| H  | 3.01899200  | -4.10772300 | -1.09090000 |
| H  | 1.27485500  | -4.38163500 | -1.15257300 |
| H  | 2.18832900  | -4.22946500 | -2.65770500 |
| C  | 2.93089300  | -1.47367200 | -2.12049400 |
| C  | 4.07483400  | -2.02040000 | -2.72693000 |
| C  | 2.88883300  | -0.07201100 | -1.99948400 |
| C  | 5.10213800  | -1.21769700 | -3.20785400 |
| H  | 4.16852000  | -3.10053400 | -2.81792700 |



|   |             |             |             |
|---|-------------|-------------|-------------|
| C | 3.91083500  | 0.73124200  | -2.49187800 |
| H | 2.06409300  | 0.38446800  | -1.45411500 |
| C | 5.02560700  | 0.16752100  | -3.10423100 |
| H | 5.97150400  | -1.68348800 | -3.67159800 |
| H | 3.83619700  | 1.81559700  | -2.39058500 |
| H | 5.82730900  | 0.79843900  | -3.48497900 |
| C | -0.52823900 | 4.27851100  | -2.34487000 |
| H | -0.28030300 | 5.33245200  | -2.53151700 |
| H | 0.21071500  | 3.67234000  | -2.89495500 |
| C | -1.93698700 | 3.91579400  | -2.79433100 |
| H | -2.65009200 | 4.58801200  | -2.29127400 |
| H | -2.08421600 | 4.04666700  | -3.87544000 |
| H | -1.60190500 | 1.81534500  | -3.06048400 |
| C | 0.90146900  | 4.06015500  | -0.21831000 |
| C | 1.13882800  | 4.99695100  | 0.78893400  |
| C | 1.95343000  | 3.23401100  | -0.62349700 |
| C | 2.39590100  | 5.11610200  | 1.37461700  |
| H | 0.32051800  | 5.63685800  | 1.12389500  |
| C | 3.21057800  | 3.35061300  | -0.04379100 |
| H | 1.78571700  | 2.48526700  | -1.40161600 |
| C | 3.43648400  | 4.29229600  | 0.95836300  |
| H | 2.56032100  | 5.85500400  | 2.15805600  |
| H | 4.01647300  | 2.69688100  | -0.37705300 |
| H | 4.42294500  | 4.38466100  | 1.41149500  |
| C | -3.58608300 | 1.95291800  | -2.31912200 |
| C | -3.82260300 | 0.58722300  | -2.51795600 |
| C | -4.67279100 | 2.76531600  | -1.98276700 |
| C | -5.08733100 | 0.03931400  | -2.34608900 |
| H | -2.98987600 | -0.05606200 | -2.80340600 |
| C | -5.94420100 | 2.22185000  | -1.81410800 |
| H | -4.53186900 | 3.83673800  | -1.84138300 |
| C | -6.15433100 | 0.85603400  | -1.97913200 |
| H | -5.23823300 | -1.02966600 | -2.49334400 |
| H | -6.77544000 | 2.87340700  | -1.54781900 |
| H | -7.14554100 | 0.42755700  | -1.83564000 |
| C | -3.00267700 | -1.03955300 | 3.55921200  |
| H | -2.64266300 | -1.46968900 | 4.50429000  |
| H | -3.78784800 | -0.31019700 | 3.81603800  |
| C | -3.59882100 | -2.08574800 | 2.62739500  |
| H | -4.48313500 | -2.58224600 | 3.05185800  |
| H | -2.85480500 | -2.87241600 | 2.42128200  |
| H | -4.80737000 | -0.68473500 | 1.55097800  |
| C | -1.31614500 | 0.93904100  | 3.29201100  |
| C | -2.05392000 | 1.82205700  | 4.08407100  |

|   |             |             |             |
|---|-------------|-------------|-------------|
| C | -0.03527700 | 1.32709400  | 2.87525000  |
| C | -1.53759600 | 3.07057300  | 4.42756000  |
| H | -3.04367700 | 1.54272900  | 4.44471700  |
| C | 0.47640800  | 2.57381600  | 3.21109000  |
| H | 0.55211400  | 0.64468700  | 2.25806600  |
| C | -0.27745200 | 3.45605300  | 3.98325200  |
| H | -2.12901900 | 3.74331100  | 5.04758300  |
| H | 1.46871800  | 2.85941300  | 2.86221000  |
| H | 0.12298600  | 4.43517100  | 4.24479000  |
| C | -4.38544800 | -2.26340100 | 0.19856400  |
| C | -5.74636400 | -2.46990500 | -0.04205200 |
| C | -3.46189400 | -2.94050900 | -0.60196400 |
| C | -6.17529700 | -3.32274900 | -1.05420100 |
| H | -6.47964800 | -1.94342000 | 0.57170900  |
| C | -3.88415400 | -3.79006700 | -1.61873600 |
| H | -2.39532500 | -2.78639900 | -0.44051200 |
| C | -5.24376000 | -3.98329500 | -1.85028000 |
| H | -7.24122300 | -3.46769800 | -1.22474300 |
| H | -3.14439600 | -4.30102800 | -2.23380600 |
| H | -5.57524700 | -4.64673700 | -2.64724200 |

#### TS3\_b4

|    |             |             |             |
|----|-------------|-------------|-------------|
| C  | 1.62871800  | -3.07322400 | 0.71299700  |
| C  | 2.67302700  | -2.09733800 | 1.24292100  |
| H  | 2.10112900  | -4.03534800 | 0.45905200  |
| H  | 0.87139000  | -3.27773000 | 1.48857800  |
| H  | 2.96158000  | -2.37389200 | 2.26876700  |
| H  | 3.58739900  | -2.14043900 | 0.62898900  |
| P  | 2.17291900  | -0.31001000 | 1.17159500  |
| P  | 0.62998700  | -2.47132000 | -0.73703400 |
| C  | 0.72377800  | 1.00508600  | -2.38730200 |
| C  | -0.53747500 | 1.57922100  | -2.45038400 |
| H  | 0.90304700  | 0.15788800  | -3.05554600 |
| C  | -1.73349100 | 1.81791500  | 0.02819900  |
| C  | -1.06422400 | 2.79120900  | -1.93585400 |
| Cu | 0.47740200  | -0.13608600 | -0.57715400 |
| O  | -0.74678800 | 1.18329100  | 0.43824000  |
| C  | 1.24129000  | 0.04669900  | 2.78230000  |
| C  | 3.77082700  | 0.47136700  | 1.80527200  |
| H  | 4.33492400  | -0.34742100 | 2.28550000  |
| C  | -0.46177200 | -3.99203700 | -0.98528300 |
| H  | 0.04457900  | -4.78955900 | -0.41524400 |
| C  | 1.67621800  | -2.86867100 | -2.27281900 |

|   |             |             |             |
|---|-------------|-------------|-------------|
| C | -2.34007200 | 3.23767900  | -2.61011600 |
| C | -2.19598900 | 3.05716400  | 0.68457200  |
| C | -3.45778900 | 3.61341500  | 0.44669200  |
| C | -1.32297900 | 3.70739400  | 1.56469600  |
| C | -3.82353800 | 4.80994400  | 1.05139700  |
| H | -4.15889100 | 3.10132300  | -0.21143900 |
| C | -1.68777100 | 4.90620800  | 2.15906600  |
| H | -0.35320300 | 3.25653900  | 1.76633500  |
| C | -2.93663400 | 5.46561200  | 1.89984000  |
| H | -4.80969000 | 5.23052000  | 0.86055400  |
| H | -0.99378900 | 5.40628400  | 2.83297400  |
| H | -3.22262200 | 6.40639100  | 2.36776700  |
| H | -1.29893100 | 0.94623100  | -2.92354100 |
| H | 1.60611800  | 1.61082200  | -2.16330200 |
| C | -3.65224700 | 0.45662100  | 0.23305700  |
| O | -2.79819700 | 1.09184200  | -0.59963400 |
| O | -3.43898400 | 0.25425200  | 1.40566000  |
| C | -4.91684700 | 0.07868800  | -0.44809900 |
| C | -5.11646000 | 0.25272800  | -1.81855700 |
| C | -5.92872100 | -0.47533200 | 0.33946600  |
| C | -6.31721200 | -0.14213200 | -2.39833400 |
| H | -4.32256500 | 0.68285800  | -2.42546800 |
| C | -7.12939400 | -0.86065200 | -0.23972500 |
| H | -5.74053200 | -0.60527300 | 1.40364200  |
| C | -7.32232400 | -0.69855700 | -1.61085700 |
| H | -6.47066500 | -0.01330100 | -3.46832100 |
| H | -7.91768000 | -1.29142200 | 0.37538100  |
| H | -8.26209900 | -1.00531200 | -2.06762300 |
| C | 3.27657900  | 1.40190200  | 2.92196100  |
| C | 2.29182200  | 0.58772700  | 3.75133500  |
| H | 0.57313300  | 0.87327600  | 2.49234900  |
| C | 0.38619600  | -1.11610100 | 3.19664300  |
| C | 0.84267200  | -2.14212200 | 4.02906700  |
| C | -0.89726500 | -1.22583400 | 2.64622500  |
| C | 0.05135500  | -3.26309800 | 4.27442800  |
| H | 1.82668600  | -2.07495700 | 4.49449000  |
| C | -1.68207900 | -2.34749000 | 2.87959500  |
| H | -1.29091800 | -0.41678300 | 2.03175200  |
| C | -1.20535100 | -3.37853500 | 3.68720400  |
| H | 0.42398600  | -4.05113100 | 4.92812500  |
| H | -2.66908100 | -2.41004300 | 2.41990800  |
| H | -1.81864700 | -4.26122800 | 3.86849500  |
| C | 4.65178900  | 1.11377600  | 0.77497500  |
| C | 6.02329800  | 0.85462400  | 0.75170400  |

|   |              |              |              |
|---|--------------|--------------|--------------|
| C | 4. 13080500  | 2. 00753200  | -0. 16213100 |
| C | 6. 85087900  | 1. 47533700  | -0. 18061500 |
| H | 6. 44594900  | 0. 15133100  | 1. 47125500  |
| C | 4. 94904500  | 2. 63276900  | -1. 09430300 |
| H | 3. 06056000  | 2. 20318900  | -0. 17031000 |
| C | 6. 31728200  | 2. 36701400  | -1. 10698700 |
| H | 7. 91865900  | 1. 25953800  | -0. 18297800 |
| H | 4. 50881700  | 3. 32946300  | -1. 80767400 |
| H | 6. 96448000  | 2. 85333900  | -1. 83505600 |
| C | -0. 28643300 | -4. 32275000 | -2. 47129200 |
| C | 1. 20578000  | -4. 24302700 | -2. 75168300 |
| H | 1. 33017500  | -2. 12353800 | -3. 00766600 |
| C | 3. 14753300  | -2. 65880200 | -2. 05716800 |
| C | 4. 00626000  | -3. 68410500 | -1. 65070500 |
| C | 3. 67980200  | -1. 37241800 | -2. 20743900 |
| C | 5. 35033000  | -3. 42689800 | -1. 38968300 |
| H | 3. 63086200  | -4. 70049100 | -1. 53405300 |
| C | 5. 01900600  | -1. 11219100 | -1. 94738800 |
| H | 3. 02389100  | -0. 55910900 | -2. 52267900 |
| C | 5. 86031700  | -2. 14080800 | -1. 52995600 |
| H | 6. 00094200  | -4. 24206400 | -1. 07543600 |
| H | 5. 40600300  | -0. 09957300 | -2. 06067000 |
| H | 6. 90931100  | -1. 93600500 | -1. 31932800 |
| C | -1. 87682700 | -3. 91035500 | -0. 50364600 |
| C | -2. 30167600 | -4. 74428500 | 0. 53305600  |
| C | -2. 81210400 | -3. 06233300 | -1. 10385000 |
| C | -3. 62781500 | -4. 74889500 | 0. 95427200  |
| H | -1. 57524700 | -5. 39619700 | 1. 02185100  |
| C | -4. 14367800 | -3. 08962100 | -0. 70802300 |
| H | -2. 49874300 | -2. 38011700 | -1. 89873700 |
| C | -4. 55617700 | -3. 92691400 | 0. 32581800  |
| H | -3. 93474700 | -5. 40345300 | 1. 76943000  |
| H | -4. 86882500 | -2. 45625400 | -1. 21398100 |
| H | -5. 60077400 | -3. 92985800 | 0. 63483300  |
| C | -0. 19596000 | 3. 86996600  | -1. 42412100 |
| C | 0. 94813400  | 3. 61174200  | -0. 64650800 |
| C | -0. 52949200 | 5. 22176400  | -1. 61876800 |
| C | 1. 72181000  | 4. 63842600  | -0. 11853700 |
| H | 1. 17568900  | 2. 57935000  | -0. 38758200 |
| C | 0. 24352600  | 6. 24938800  | -1. 09232000 |
| H | -1. 41538100 | 5. 48218600  | -2. 19449000 |
| C | 1. 38104500  | 5. 96844800  | -0. 34323800 |
| H | 2. 59906400  | 4. 39360600  | 0. 48339700  |
| H | -0. 04940700 | 7. 28339300  | -1. 27250900 |

|   |             |             |             |
|---|-------------|-------------|-------------|
| H | 1.98939300  | 6.77350100  | 0.06612300  |
| H | -2.94962500 | 3.88902500  | -1.96836400 |
| H | -2.13768000 | 3.80247900  | -3.53484600 |
| H | -2.95734700 | 2.37519600  | -2.88926200 |
| H | 4.11976000  | 1.78771900  | 3.51198100  |
| H | 2.76598000  | 2.27458200  | 2.47634800  |
| H | 2.83827900  | -0.23545000 | 4.23917300  |
| H | 1.82311400  | 1.17725300  | 4.55150300  |
| H | -0.71202200 | -5.30942800 | -2.70058000 |
| H | -0.82859600 | -3.58769100 | -3.08866100 |
| H | 1.71043300  | -5.04584100 | -2.19221100 |
| H | 1.44991600  | -4.39407200 | -3.81246300 |

**Table S5.** Electronic energies ( $E_{elec}$ ), Gibbs free energies ( $G_{298}$ ), thermal correction to Gibbs free energy ( $cor G_{gas}$ ), solvation energies ( $E_{sol}$ ), solvation free energies ( $G_{sol}$ ) in THF ( $\epsilon = 7.43$ ) for all stationary points of the process. Calculations were carried out at M06/6-311+G(d,p)/SDD/SMD(THF)//wB97X-D/6-31G(d)/LANL2DZ level.

| species       | $E_{elec}$<br>(a.u.) | $G_{298}$<br>(a.u.) | $cor G_{gas}$<br>(a.u.) | $E_{sol}$<br>(a.u.) | $G_{sol}$<br>(a.u.) |
|---------------|----------------------|---------------------|-------------------------|---------------------|---------------------|
| <b>Int2_a</b> | -2583.326481         | -2582.600810        | 0.725670                | -2584.240506        | -2583.514836        |
| <b>Int2_b</b> | -2583.323425         | -2582.598003        | 0.725422                | -2584.239526        | -2583.514104        |
| <b>2a</b>     | -764.952140          | -764.785723         | 0.166417                | -764.906043         | -764.739626         |
| <b>TS3_a1</b> | -3348.296327         | -3347.375347        | 0.920980                | -3349.154447        | -3348.233467        |
| <b>TS3_a2</b> | -3348.287638         | -3347.367148        | 0.920490                | -3349.142702        | -3348.222212        |
| <b>TS3_a3</b> | -3348.290710         | -3347.371942        | 0.918767                | -3349.148259        | -3348.229492        |
| <b>TS3_a4</b> | -3348.288116         | -3347.368064        | 0.920051                | -3349.145852        | -3348.225801        |
| <b>TS3_b1</b> | -3348.297015         | -3347.374428        | 0.922588                | -3349.151989        | -3348.229401        |
| <b>TS3_b2</b> | -3348.286553         | -3347.364032        | 0.922520                | -3349.137043        | -3348.214523        |
| <b>TS3_b3</b> | -3348.277209         | -3347.354194        | 0.923016                | -3349.129133        | -3348.206117        |
| <b>TS3_b4</b> | -3348.283399         | -3347.362618        | 0.920781                | -3349.142055        | -3348.221274        |

### Cartesian coordinates for the optimized structures in Table S5

#### Int2\_a

|    |             |            |             |
|----|-------------|------------|-------------|
| C  | -1.01175500 | 0.99886700 | 1.93464200  |
| C  | 0.21264000  | 1.89769700 | 1.69823300  |
| Cu | -0.06603800 | 0.31551300 | -1.32627100 |
| C  | -0.31411100 | 3.64918700 | -0.64388100 |
| H  | -0.31328400 | 3.57966800 | -1.73921400 |
| C  | 2.27038000  | 3.08014700 | 0.06491700  |
| H  | 2.40349700  | 3.26412900 | 1.13894600  |

|   |             |             |             |
|---|-------------|-------------|-------------|
| C | -2.80179600 | -1.15673600 | 1.18365300  |
| H | -3.10227400 | -0.68511800 | 2.12868200  |
| C | -0.15581100 | -1.80820100 | 1.38768700  |
| H | 0.06978100  | -2.41459100 | 0.50480300  |
| P | 0.65750400  | 2.14107800  | -0.09112700 |
| P | -1.16560400 | -0.38329500 | 0.70294500  |
| C | 0.00340800  | -0.74250200 | -3.04250800 |
| H | 0.83948200  | -0.45775700 | -3.68719700 |
| H | -0.95106300 | -0.60562200 | -3.56234800 |
| C | 0.11651200  | -2.04502100 | -2.39682500 |
| C | 1.22673300  | -2.76745400 | -2.08017800 |
| H | -0.82920500 | -2.43437400 | -2.01253500 |
| C | 2.59634300  | -2.30873600 | -2.51771900 |
| H | 3.29950700  | -3.14603100 | -2.58893600 |
| H | 2.54448100  | -1.83503400 | -3.50421400 |
| H | 3.04398400  | -1.56552700 | -1.83818000 |
| C | 1.11702700  | -3.91443200 | -1.15828500 |
| C | 2.15161000  | -4.21318200 | -0.25397500 |
| C | -0.04902300 | -4.70091600 | -1.07259600 |
| C | 2.00732700  | -5.19790000 | 0.71852900  |
| H | 3.06943400  | -3.63298900 | -0.28073700 |
| C | -0.19572300 | -5.68093300 | -0.09861400 |
| H | -0.84750100 | -4.54798300 | -1.79327100 |
| C | 0.82855700  | -5.93217800 | 0.81396700  |
| H | 2.81999800  | -5.38129000 | 1.41637800  |
| H | -1.11242500 | -6.26426900 | -0.06229300 |
| H | 0.71544200  | -6.69964000 | 1.57412600  |
| C | -1.11998500 | -2.62692900 | 2.25307000  |
| C | -2.44745400 | -2.63072200 | 1.49006600  |
| H | -0.72989000 | -3.63843200 | 2.40703600  |
| H | -1.26858600 | -2.16537500 | 3.23856500  |
| H | -3.25722600 | -3.11110300 | 2.04978700  |
| H | -2.32434600 | -3.18535400 | 0.55064400  |
| C | 1.99582200  | 4.44523500  | -0.60873400 |
| C | 0.56026900  | 4.84747700  | -0.25620300 |
| C | 1.15484000  | -1.33093700 | 1.95307200  |
| C | 1.36464900  | -1.08399200 | 3.31030000  |
| C | 2.18632400  | -1.03211900 | 1.05393900  |
| C | 2.56678500  | -0.53084500 | 3.75307100  |
| H | 0.58973100  | -1.31805600 | 4.03461000  |
| C | 3.38528400  | -0.48360100 | 1.48975000  |
| H | 2.03213400  | -1.22994900 | -0.00333800 |
| C | 3.57603100  | -0.22106700 | 2.84587500  |
| H | 2.71214800  | -0.34331000 | 4.81331100  |

|   |             |             |             |
|---|-------------|-------------|-------------|
| H | 4.16636300  | -0.25834900 | 0.76989000  |
| H | 4.50946800  | 0.21353100  | 3.19139300  |
| C | -3.91673900 | -0.96680800 | 0.18289600  |
| C | -5.20349400 | -0.65507200 | 0.62790700  |
| C | -3.70273700 | -1.10482700 | -1.19224800 |
| C | -6.25108000 | -0.47978800 | -0.27275700 |
| H | -5.38463900 | -0.53728600 | 1.69382200  |
| C | -4.74581000 | -0.92976600 | -2.09571600 |
| H | -2.70460800 | -1.31838400 | -1.56514100 |
| C | -6.02480300 | -0.61460500 | -1.63986700 |
| H | -7.24338600 | -0.23427300 | 0.09484300  |
| H | -4.55623700 | -1.03540900 | -3.15988900 |
| H | -6.83734200 | -0.47450600 | -2.34660100 |
| C | -1.74463300 | 3.56802900  | -0.17313100 |
| C | -2.61621600 | 2.69628800  | -0.83991200 |
| C | -2.21258600 | 4.23884500  | 0.95772500  |
| C | -3.90684800 | 2.47634100  | -0.37567400 |
| H | -2.26765600 | 2.16416700  | -1.72350000 |
| C | -3.50898100 | 4.02292900  | 1.42527900  |
| H | -1.56619700 | 4.93008700  | 1.49049500  |
| C | -4.35528700 | 3.13524100  | 0.76804900  |
| H | -4.55769300 | 1.78519200  | -0.90203100 |
| H | -3.85393500 | 4.55028000  | 2.31012800  |
| H | -5.36069200 | 2.95873900  | 1.13827900  |
| C | 3.50408400  | 2.36671900  | -0.44017800 |
| C | 3.48415700  | 1.54892300  | -1.57386000 |
| C | 4.71320500  | 2.53394600  | 0.24023400  |
| C | 4.64095300  | 0.90512500  | -2.00422300 |
| H | 2.55215200  | 1.37872700  | -2.10707800 |
| C | 5.87281000  | 1.89588000  | -0.19029500 |
| H | 4.74252600  | 3.16127100  | 1.12852900  |
| C | 5.83903500  | 1.07360000  | -1.31384400 |
| H | 4.59920700  | 0.25943800  | -2.87648300 |
| H | 6.80126200  | 2.03485300  | 0.35602400  |
| H | 6.73876500  | 0.56580600  | -1.64795400 |
| H | 2.73178700  | 5.18762700  | -0.28257100 |
| H | 2.09946200  | 4.34211600  | -1.69648300 |
| H | 0.49747700  | 5.04511000  | 0.82172700  |
| H | 0.24367300  | 5.75898500  | -0.77481600 |
| H | 1.10138200  | 1.43930500  | 2.14764500  |
| H | 0.06502300  | 2.86929700  | 2.18565000  |
| H | -0.98891600 | 0.60574900  | 2.95812100  |
| H | -1.93396200 | 1.58206200  | 1.82613300  |

**Int2\_b**

|    |             |             |             |
|----|-------------|-------------|-------------|
| C  | 0.54804200  | -2.03805600 | -1.39983300 |
| C  | 1.85321800  | -2.00783100 | -0.59020100 |
| H  | -0.14559900 | -2.76548100 | -0.95939000 |
| H  | 0.75993000  | -2.37149900 | -2.42314700 |
| H  | 2.14353600  | -3.02772000 | -0.30848100 |
| H  | 2.66235500  | -1.59539800 | -1.20533600 |
| Cu | 0.44622700  | 0.88877500  | 0.49364500  |
| C  | 1.15672400  | -1.97047600 | 2.30864600  |
| H  | 0.82358400  | -1.24178200 | 3.05913000  |
| C  | 3.58851400  | -1.00974400 | 1.48666300  |
| H  | 4.07477700  | -1.74680600 | 0.83446900  |
| C  | -1.91180100 | -0.99293400 | -2.41662700 |
| H  | -1.66502900 | -1.99176300 | -2.80059700 |
| C  | 0.29373800  | 0.56870100  | -2.84313100 |
| H  | -0.00684900 | 1.59426400  | -2.59282800 |
| P  | 1.80920100  | -0.91312000 | 0.90564700  |
| P  | -0.41398700 | -0.44326100 | -1.41602900 |
| C  | 0.00354700  | 2.81776700  | 0.82515100  |
| H  | 0.93594300  | 3.37598800  | 0.67132100  |
| H  | -0.32069200 | 2.94768700  | 1.86315600  |
| C  | -0.99640400 | 3.19977300  | -0.17476400 |
| C  | -2.35571900 | 3.23496100  | -0.15577900 |
| H  | -0.55604700 | 3.50260500  | -1.13061300 |
| C  | -3.09764200 | 3.70979400  | -1.38865500 |
| H  | -3.89766900 | 3.01341100  | -1.67807000 |
| H  | -3.56894900 | 4.69318700  | -1.25108300 |
| H  | -2.41234200 | 3.80418800  | -2.23823900 |
| C  | -3.18662800 | 2.83908800  | 1.00124000  |
| C  | -2.76730600 | 1.87159200  | 1.93286100  |
| C  | -4.48213800 | 3.36086200  | 1.17146900  |
| C  | -3.58778400 | 1.45775800  | 2.97563200  |
| H  | -1.79494400 | 1.40830600  | 1.80910600  |
| C  | -5.29959400 | 2.95883700  | 2.22335700  |
| H  | -4.85919700 | 4.09893900  | 0.47047600  |
| C  | -4.85915900 | 2.00306800  | 3.13565300  |
| H  | -3.23225300 | 0.69570500  | 3.66499200  |
| H  | -6.28936900 | 3.39564000  | 2.32802600  |
| H  | -5.49891000 | 1.68486400  | 3.95369200  |
| C  | -1.94469500 | -0.03059300 | -3.62179100 |
| C  | -0.49930500 | 0.15075100  | -4.08764400 |
| C  | 3.50232600  | -1.62590800 | 2.90217600  |
| C  | 2.39210300  | -2.68052600 | 2.87440900  |



|   |              |              |              |
|---|--------------|--------------|--------------|
| C | 4. 37240900  | 0. 27875600  | 1. 40612400  |
| C | 5. 68264000  | 0. 26040300  | 0. 92272200  |
| C | 3. 82811600  | 1. 50013900  | 1. 81486000  |
| C | 6. 43196300  | 1. 43095800  | 0. 83891900  |
| H | 6. 11759000  | -0. 68094300 | 0. 59456200  |
| C | 4. 57157000  | 2. 67295500  | 1. 72751100  |
| H | 2. 80269300  | 1. 54686300  | 2. 17273200  |
| C | 5. 87596900  | 2. 64361900  | 1. 23769700  |
| H | 7. 44713200  | 1. 39546900  | 0. 45402300  |
| H | 4. 12450700  | 3. 61312100  | 2. 03639300  |
| H | 6. 45285900  | 3. 56079700  | 1. 16580000  |
| C | -0. 04459800 | -2. 77127700 | 1. 87356900  |
| C | -1. 27254400 | -2. 11068100 | 1. 73514800  |
| C | 0. 03187100  | -4. 11629500 | 1. 50972400  |
| C | -2. 38691900 | -2. 76474300 | 1. 22682900  |
| H | -1. 35125300 | -1. 05926700 | 2. 00505600  |
| C | -1. 08589100 | -4. 77756600 | 1. 00014200  |
| H | 0. 96660800  | -4. 65909100 | 1. 61542500  |
| C | -2. 29330300 | -4. 10362300 | 0. 84875800  |
| H | -3. 32285200 | -2. 22680500 | 1. 11362000  |
| H | -1. 00611000 | -5. 82425000 | 0. 72023100  |
| H | -3. 16142500 | -4. 61129000 | 0. 43966700  |
| C | 1. 79998900  | 0. 52025000  | -2. 87031400 |
| C | 2. 51793400  | -0. 39218400 | -3. 64710300 |
| C | 2. 51337400  | 1. 35682800  | -2. 00151600 |
| C | 3. 90409300  | -0. 49115600 | -3. 53018700 |
| H | 1. 99918200  | -1. 04463600 | -4. 34322600 |
| C | 3. 89344100  | 1. 25527000  | -1. 87569800 |
| H | 1. 97301500  | 2. 08363800  | -1. 39776300 |
| C | 4. 59487500  | 0. 32029100  | -2. 63471800 |
| H | 4. 44306900  | -1. 21052000 | -4. 14044500 |
| H | 4. 41956600  | 1. 90141900  | -1. 17978900 |
| H | 5. 67221700  | 0. 23314800  | -2. 53032300 |
| C | -3. 20835900 | -1. 08414100 | -1. 65296300 |
| C | -3. 63475100 | -0. 03489600 | -0. 83648000 |
| C | -4. 01211800 | -2. 22060000 | -1. 76243600 |
| C | -4. 83454500 | -0. 11908000 | -0. 13750400 |
| H | -3. 01167300 | 0. 84899400  | -0. 72677700 |
| C | -5. 21575900 | -2. 31011600 | -1. 06739000 |
| H | -3. 68830100 | -3. 04774600 | -2. 39052800 |
| C | -5. 62802800 | -1. 25995800 | -0. 25047800 |
| H | -5. 13797300 | 0. 70350500  | 0. 50292700  |
| H | -5. 82782700 | -3. 20300000 | -1. 16066300 |
| H | -6. 56339900 | -1. 32946600 | 0. 29711500  |

|   |             |             |             |
|---|-------------|-------------|-------------|
| H | -2.36362700 | 0.93483300  | -3.30907200 |
| H | -2.59450700 | -0.42686000 | -4.40936200 |
| H | -0.40718300 | 0.89765800  | -4.88381200 |
| H | -0.13062200 | -0.80206700 | -4.48904600 |
| H | 4.47041700  | -2.04438400 | 3.19651400  |
| H | 3.25402100  | -0.84175200 | 3.62880000  |
| H | 2.19350600  | -3.10308500 | 3.86529800  |
| H | 2.70051100  | -3.50758200 | 2.22179800  |

**2a**

|   |             |             |             |
|---|-------------|-------------|-------------|
| C | -4.76516500 | -0.01311000 | -0.36692200 |
| C | -3.57312200 | -0.68645100 | -0.59639900 |
| C | -2.36962400 | -0.15492300 | -0.12567600 |
| C | -2.36379700 | 1.05224900  | 0.57719000  |
| C | -3.56038400 | 1.72201700  | 0.80584200  |
| C | -4.75871100 | 1.19133100  | 0.33432000  |
| H | -5.69951500 | -0.42662800 | -0.73323000 |
| H | -3.55400400 | -1.62765600 | -1.13561300 |
| H | -1.42816700 | 1.45882400  | 0.94422600  |
| H | -3.55815000 | 2.65933900  | 1.35341000  |
| H | -5.69179300 | 1.71680900  | 0.51497400  |
| C | -1.13020600 | -0.92638500 | -0.39406000 |
| O | -1.07825900 | -1.99359700 | -0.93733000 |
| O | 0.00002000  | -0.23493800 | -0.00027900 |
| C | 1.13011100  | -0.92630400 | 0.39392000  |
| O | 1.07805300  | -1.99341100 | 0.93739800  |
| C | 2.36960700  | -0.15491400 | 0.12564600  |
| C | 2.36393800  | 1.05216600  | -0.57738200 |
| C | 3.57300900  | -0.68642200 | 0.59662400  |
| C | 3.56058800  | 1.72185100  | -0.80594500 |
| H | 1.42838200  | 1.45873300  | -0.94461800 |
| C | 4.76511900  | -0.01316600 | 0.36723200  |
| H | 3.55377900  | -1.62755500 | 1.13595900  |
| C | 4.75882500  | 1.19117700  | -0.33417800 |
| H | 3.55847200  | 2.65910200  | -1.35363800 |
| H | 5.69939500  | -0.42668100 | 0.73372900  |
| H | 5.69195600  | 1.71658900  | -0.51477000 |

**TS3\_a1**

|   |             |             |             |
|---|-------------|-------------|-------------|
| C | -3.29095500 | -1.19677900 | 0.66801200  |
| C | -3.71866700 | 0.22146300  | 0.27331800  |
| H | -3.54728200 | -1.90276700 | -0.13154200 |

|    |             |             |             |
|----|-------------|-------------|-------------|
| H  | -3.83211800 | -1.51251900 | 1.56814400  |
| H  | -3.67729900 | 0.88321100  | 1.14629200  |
| H  | -4.75661000 | 0.21219000  | -0.07829900 |
| P  | -2.60799300 | 1.02008200  | -0.98234700 |
| P  | -1.45918200 | -1.38888400 | 0.92133500  |
| C  | 0.43234000  | -0.84198300 | -2.46484100 |
| C  | 1.78595400  | -0.80450200 | -2.13591300 |
| H  | -0.04465600 | -1.81913100 | -2.40764600 |
| C  | 2.17245100  | 1.18223200  | -0.11771200 |
| C  | 2.69612000  | 0.24683400  | -2.31593200 |
| Cu | -0.47318900 | -0.01811400 | -0.68287100 |
| O  | 0.96368100  | 1.40181000  | -0.23790600 |
| C  | -3.31383900 | 2.75549700  | -0.99620800 |
| H  | -4.29871900 | 2.67485500  | -0.51511500 |
| C  | -3.32791200 | 0.59473600  | -2.67644900 |
| C  | -1.15639100 | -0.96981500 | 2.72711500  |
| H  | -0.09869800 | -0.69463000 | 2.76440200  |
| C  | -1.33796900 | -3.23988300 | 1.19388300  |
| C  | 2.20365800  | 1.42439500  | -3.11943400 |
| H  | 2.83295900  | 2.31047600  | -3.00928700 |
| H  | 2.13488100  | 1.19324300  | -4.19202100 |
| H  | 1.19973500  | 1.70634600  | -2.77668800 |
| C  | 4.14456500  | -0.00157700 | -2.18829500 |
| C  | 5.09169500  | 0.91789700  | -2.67368200 |
| C  | 4.66774700  | -1.13684000 | -1.53416700 |
| C  | 6.45932900  | 0.73288500  | -2.49412300 |
| H  | 4.76100100  | 1.80922600  | -3.19412200 |
| C  | 6.02990100  | -1.31966400 | -1.34571000 |
| H  | 3.99575300  | -1.90425500 | -1.16618000 |
| C  | 6.94520700  | -0.38091200 | -1.82032800 |
| H  | 7.14881700  | 1.47844000  | -2.88148100 |
| H  | 6.38071100  | -2.20898900 | -0.82793100 |
| H  | 8.01171100  | -0.52358600 | -1.67466900 |
| C  | 3.20261200  | 2.23126100  | -0.17944400 |
| C  | 4.52131000  | 2.00162300  | 0.22144000  |
| C  | 2.83936500  | 3.49442600  | -0.66282800 |
| C  | 5.45681400  | 3.02843600  | 0.15748700  |
| H  | 4.82038200  | 1.01514300  | 0.55825200  |
| C  | 3.77870700  | 4.51376800  | -0.73145100 |
| H  | 1.81799500  | 3.65812400  | -0.98910300 |
| C  | 5.09058700  | 4.28456700  | -0.31552000 |
| H  | 6.48075800  | 2.83603500  | 0.46212900  |
| H  | 3.48764800  | 5.48996600  | -1.10836500 |
| H  | 5.82560600  | 5.08244500  | -0.36722000 |

|   |              |              |              |
|---|--------------|--------------|--------------|
| H | 2. 14557500  | -1. 68924400 | -1. 61818900 |
| H | 0. 04175900  | -0. 16779900 | -3. 22675100 |
| C | 2. 31768800  | 0. 02184700  | 1. 91591500  |
| O | 2. 56641600  | 0. 01362500  | 0. 58900800  |
| O | 1. 87136200  | 0. 97193800  | 2. 51569500  |
| C | 2. 62416600  | -1. 28721900 | 2. 55873900  |
| C | 3. 21873300  | -2. 33997800 | 1. 86190800  |
| C | 2. 26860800  | -1. 44909200 | 3. 90063700  |
| C | 3. 42774500  | -3. 56025600 | 2. 49598000  |
| H | 3. 51584800  | -2. 19251600 | 0. 83030300  |
| C | 2. 47906500  | -2. 66868700 | 4. 53157800  |
| H | 1. 82024600  | -0. 61152300 | 4. 42558600  |
| C | 3. 05239200  | -3. 72708300 | 3. 82702800  |
| H | 3. 87934900  | -4. 38212000 | 1. 94946400  |
| H | 2. 19662300  | -2. 79669800 | 5. 57200700  |
| H | 3. 20991500  | -4. 68280900 | 4. 31794700  |
| C | -1. 31843300 | -2. 29589700 | 3. 48166500  |
| H | -0. 83656100 | -2. 24916000 | 4. 46453600  |
| H | -2. 37833800 | -2. 52880200 | 3. 64590200  |
| C | -0. 69928200 | -3. 37813000 | 2. 59224900  |
| H | 0. 38428000  | -3. 22540200 | 2. 52290300  |
| H | -0. 85823900 | -4. 38586300 | 2. 99057200  |
| H | -2. 36975000 | -3. 60897900 | 1. 25839900  |
| C | -1. 95266700 | 0. 24133300  | 3. 14327000  |
| C | -1. 48087100 | 1. 50583000  | 2. 76439500  |
| C | -3. 18571800 | 0. 15315500  | 3. 79303100  |
| C | -2. 23645300 | 2. 64727900  | 3. 00706800  |
| H | -0. 51882400 | 1. 59259400  | 2. 26443900  |
| C | -3. 94313500 | 1. 29799100  | 4. 03724800  |
| H | -3. 57168000 | -0. 81194700 | 4. 10849400  |
| C | -3. 47591500 | 2. 54616500  | 3. 63652200  |
| H | -1. 85810200 | 3. 61547200  | 2. 69473900  |
| H | -4. 90242400 | 1. 20899900  | 4. 53951100  |
| H | -4. 06750600 | 3. 43862200  | 3. 81853300  |
| C | -3. 57000200 | 3. 03778300  | -2. 48996600 |
| H | -4. 19567500 | 3. 92842600  | -2. 61296300 |
| H | -2. 61731300 | 3. 23681100  | -2. 99856700 |
| C | -4. 22878500 | 1. 77922300  | -3. 06079900 |
| H | -2. 45368000 | 0. 61224900  | -3. 33877300 |
| H | -5. 22466600 | 1. 67252400  | -2. 61338100 |
| H | -4. 36529200 | 1. 83312000  | -4. 14617400 |
| C | -2. 53570200 | 3. 82545900  | -0. 26487000 |
| C | -3. 24060900 | 4. 87285300  | 0. 33660100  |
| C | -1. 14228100 | 3. 81525800  | -0. 16655200 |

|   |             |             |             |
|---|-------------|-------------|-------------|
| C | -2.57634900 | 5.88734000  | 1.01874700  |
| H | -4.32691600 | 4.88817500  | 0.27556900  |
| C | -0.47559400 | 4.82202900  | 0.52826600  |
| H | -0.56686100 | 2.99687400  | -0.58813500 |
| C | -1.18709100 | 5.86237100  | 1.12024700  |
| H | -3.14380500 | 6.69029300  | 1.48066000  |
| H | 0.60517200  | 4.77604600  | 0.62555300  |
| H | -0.66384100 | 6.64266600  | 1.66509000  |
| C | -3.89971500 | -0.80093700 | -2.70551900 |
| C | -3.03575700 | -1.87532900 | -2.94819100 |
| C | -5.23306900 | -1.08446100 | -2.39602700 |
| C | -3.47465200 | -3.19089800 | -2.84959900 |
| H | -2.00003000 | -1.67362900 | -3.20105000 |
| C | -5.67927700 | -2.40112300 | -2.30288100 |
| H | -5.93727100 | -0.27756800 | -2.21537600 |
| C | -4.80075400 | -3.45954100 | -2.51780600 |
| H | -2.77349300 | -4.00130500 | -3.02416700 |
| H | -6.71962100 | -2.59778200 | -2.06005900 |
| H | -5.15014000 | -4.48479800 | -2.43751300 |
| C | -0.63204800 | -3.98050500 | 0.08657900  |
| C | 0.68390400  | -3.66278600 | -0.26232600 |
| C | -1.28028200 | -4.99709200 | -0.61572300 |
| C | 1.33809000  | -4.35039100 | -1.27720400 |
| H | 1.18875200  | -2.84961500 | 0.25166900  |
| C | -0.63057900 | -5.68512200 | -1.63917800 |
| H | -2.30858100 | -5.24784500 | -0.36529200 |
| C | 0.68182300  | -5.36522200 | -1.97175700 |
| H | 2.35980200  | -4.08678300 | -1.53752200 |
| H | -1.15187800 | -6.47413000 | -2.17426400 |
| H | 1.19009600  | -5.89741700 | -2.77015300 |

### TS3\_a2

|   |             |             |             |
|---|-------------|-------------|-------------|
| C | -3.91906800 | -0.80543800 | 0.60709400  |
| C | -3.12089000 | -2.06842500 | 0.97921700  |
| H | -4.93576600 | -1.08410900 | 0.30276800  |
| H | -4.01207300 | -0.15307400 | 1.48214800  |
| H | -3.46350400 | -2.43906400 | 1.95326800  |
| H | -3.31311700 | -2.86005600 | 0.24697800  |
| P | -1.27702400 | -1.82771300 | 0.97814000  |
| P | -3.12863500 | 0.25619500  | -0.69373700 |
| C | 0.00389900  | 0.58456900  | -2.54449000 |
| C | 1.04813100  | 1.43934900  | -2.22882700 |
| H | -0.88462900 | 1.01485100  | -3.00341900 |

|    |             |             |             |
|----|-------------|-------------|-------------|
| C  | 1.92359000  | 1.09137000  | 0.44349200  |
| C  | 2.34403900  | 1.06330900  | -1.80339900 |
| Cu | -0.80196400 | 0.01382400  | -0.56913500 |
| O  | 0.88573400  | 0.41989300  | 0.55471300  |
| C  | -0.90750600 | -1.20144900 | 2.71079000  |
| C  | -0.67337000 | -3.57161800 | 1.35497700  |
| H  | -1.56504800 | -4.21022300 | 1.39616700  |
| C  | -4.31635700 | 1.71317400  | -0.76266900 |
| H  | -5.06655600 | 1.53520200  | 0.01767500  |
| C  | -3.75616000 | -0.48183300 | -2.30693100 |
| C  | 2.63884100  | -0.41483000 | -1.90645400 |
| H  | 3.56954200  | -0.69623900 | -1.41105600 |
| H  | 2.69783000  | -0.75065800 | -2.95192700 |
| H  | 1.83532600  | -0.98468800 | -1.42615600 |
| C  | 3.46312200  | 2.01977200  | -1.98099300 |
| C  | 4.77946000  | 1.56570900  | -2.17859300 |
| C  | 3.28384500  | 3.41564000  | -1.94336600 |
| C  | 5.85073200  | 2.44557900  | -2.30328200 |
| H  | 4.97615300  | 0.50231800  | -2.25881500 |
| C  | 4.35061100  | 4.29502900  | -2.07368400 |
| H  | 2.29692500  | 3.83505000  | -1.77575100 |
| C  | 5.64787700  | 3.82026600  | -2.24848700 |
| H  | 6.85039700  | 2.04642200  | -2.45604300 |
| H  | 4.16350300  | 5.36416900  | -2.02101300 |
| H  | 6.48150600  | 4.50961800  | -2.34504700 |
| H  | 0.81730100  | 2.50421400  | -2.25123900 |
| H  | 0.22076600  | -0.44297300 | -2.83486500 |
| C  | -0.05465100 | -3.48550500 | 2.77274900  |
| C  | -0.85321600 | -2.46242000 | 3.57933200  |
| H  | 0.11008000  | -0.80290400 | 2.62252300  |
| C  | -1.83265300 | -0.08113100 | 3.11303400  |
| C  | -2.98301100 | -0.27804100 | 3.88068300  |
| C  | -1.57732400 | 1.20504100  | 2.61917600  |
| C  | -3.87909600 | 0.76803100  | 4.10251700  |
| H  | -3.19786200 | -1.25519800 | 4.30318400  |
| C  | -2.47308600 | 2.24628700  | 2.82712000  |
| H  | -0.66415300 | 1.37337100  | 2.05749000  |
| C  | -3.63935900 | 2.02741100  | 3.55993100  |
| H  | -4.77203200 | 0.59198200  | 4.69607200  |
| H  | -2.26161100 | 3.22715700  | 2.41077300  |
| H  | -4.34502000 | 2.83742500  | 3.72160700  |
| C  | 0.28235900  | -4.12961400 | 0.32933000  |
| C  | 0.07978000  | -5.38883300 | -0.23605100 |
| C  | 1.41553400  | -3.40162300 | -0.04708200 |

|   |             |             |             |
|---|-------------|-------------|-------------|
| C | 0.98341700  | -5.90821300 | -1.16212200 |
| H | -0.79880200 | -5.96573000 | 0.04459100  |
| C | 2.32262500  | -3.91670800 | -0.96527100 |
| H | 1.57907000  | -2.41852200 | 0.38496400  |
| C | 2.10686000  | -5.17306000 | -1.53009200 |
| H | 0.80864900  | -6.88916400 | -1.59537200 |
| H | 3.19781800  | -3.33351200 | -1.23748000 |
| H | 2.81255700  | -5.57604700 | -2.25059700 |
| C | -5.00915100 | 1.61080500  | -2.14469000 |
| C | -5.14724800 | 0.13129600  | -2.50060400 |
| H | -3.09405400 | -0.06628400 | -3.07851100 |
| C | -3.61512900 | -1.98413100 | -2.32816600 |
| C | -4.68184800 | -2.84832100 | -2.07285800 |
| C | -2.34398000 | -2.53892800 | -2.52218500 |
| C | -4.47544300 | -4.22406200 | -1.97661500 |
| H | -5.68432900 | -2.45516800 | -1.93453100 |
| C | -2.13203200 | -3.90783300 | -2.42084400 |
| H | -1.50479400 | -1.88256000 | -2.73357500 |
| C | -3.20006600 | -4.75721700 | -2.13563600 |
| H | -5.31756200 | -4.87865500 | -1.77054500 |
| H | -1.13202800 | -4.30919900 | -2.55074800 |
| H | -3.03789600 | -5.82742500 | -2.04791100 |
| C | -3.68161200 | 3.06159700  | -0.52736800 |
| C | -4.25952900 | 3.97064400  | 0.35978400  |
| C | -2.53667100 | 3.45020000  | -1.23067900 |
| C | -3.71569800 | 5.24087600  | 0.53747100  |
| H | -5.14374800 | 3.67867300  | 0.92131200  |
| C | -1.99361100 | 4.71821900  | -1.06156900 |
| H | -2.05437800 | 2.74937900  | -1.90842700 |
| C | -2.58387500 | 5.62029400  | -0.17751100 |
| H | -4.17899500 | 5.93413100  | 1.23347600  |
| H | -1.09688400 | 4.99689000  | -1.60728200 |
| H | -2.15828800 | 6.61079200  | -0.04461300 |
| C | 1.97517500  | 2.54421600  | 0.74386500  |
| C | 3.16209400  | 3.17880400  | 1.11519000  |
| C | 0.79529100  | 3.29161600  | 0.66077100  |
| C | 3.16723200  | 4.53708200  | 1.41629100  |
| H | 4.08363500  | 2.61045100  | 1.15589100  |
| C | 0.80465500  | 4.64695800  | 0.96437200  |
| H | -0.12785300 | 2.80806800  | 0.35384500  |
| C | 1.99052100  | 5.27439000  | 1.34489900  |
| H | 4.09859600  | 5.01903500  | 1.69775900  |
| H | -0.12127200 | 5.21035400  | 0.91167500  |
| H | 1.99409700  | 6.33438900  | 1.58242300  |

|   |             |             |             |
|---|-------------|-------------|-------------|
| O | 3.16742300  | 0.46775700  | 0.72789800  |
| C | 3.25783800  | -0.64038600 | 1.48682800  |
| O | 2.42881400  | -1.01524400 | 2.28499600  |
| C | 4.53614500  | -1.36617500 | 1.23078200  |
| C | 5.57451000  | -0.79474800 | 0.48997000  |
| C | 4.67219100  | -2.65708200 | 1.74565400  |
| C | 6.74150700  | -1.51635500 | 0.26631400  |
| H | 5.46022600  | 0.20587100  | 0.08676800  |
| C | 5.83620800  | -3.37897600 | 1.50962500  |
| H | 3.85426200  | -3.08433800 | 2.31597300  |
| C | 6.87212300  | -2.80827100 | 0.77251600  |
| H | 7.54953900  | -1.06973400 | -0.30520100 |
| H | 5.93673100  | -4.38637100 | 1.90177900  |
| H | 7.78334000  | -3.37110600 | 0.59161800  |
| H | -0.03912600 | -4.47461200 | 3.24310400  |
| H | 0.98172400  | -3.13873000 | 2.69108500  |
| H | -1.85923200 | -2.85632100 | 3.77650300  |
| H | -0.38730300 | -2.25332800 | 4.54858700  |
| H | -5.97281900 | 2.13046100  | -2.12912900 |
| H | -4.38673900 | 2.11205800  | -2.89657100 |
| H | -5.87534800 | -0.33435800 | -1.82466000 |
| H | -5.51212900 | -0.01722000 | -3.52304100 |

**TS3\_a3**

|    |             |             |             |
|----|-------------|-------------|-------------|
| C  | -3.57545900 | 1.20489800  | 0.98397300  |
| C  | -2.91084300 | 2.44284100  | 0.36954300  |
| H  | -4.37650200 | 0.84131500  | 0.32918200  |
| H  | -4.03282100 | 1.46709600  | 1.94525200  |
| H  | -2.31850800 | 2.96272800  | 1.13084500  |
| H  | -3.67999400 | 3.14457500  | 0.02405600  |
| P  | -1.71088500 | 2.07042800  | -1.00036800 |
| P  | -2.43421300 | -0.24249100 | 1.19106100  |
| C  | -0.55087800 | -1.53082500 | -2.17468500 |
| C  | 0.54870100  | -2.26507900 | -1.75153400 |
| H  | -1.51850200 | -2.02958600 | -2.15349500 |
| C  | 1.95980900  | -0.87236200 | 0.25241000  |
| C  | 1.91075500  | -1.89269000 | -1.81022600 |
| Cu | -0.86924100 | -0.10573000 | -0.54664900 |
| O  | 1.04856700  | -0.03530200 | 0.17219300  |
| C  | -0.98113400 | 3.78024800  | -1.27162800 |
| H  | -1.52018800 | 4.44730300  | -0.58680200 |
| C  | -2.75341200 | 2.13399100  | -2.56458800 |
| C  | -1.60570700 | -0.02622200 | 2.86701000  |



|   |             |             |             |
|---|-------------|-------------|-------------|
| H | -0.67271500 | -0.59381100 | 2.77726300  |
| C | -3.62931000 | -1.54880200 | 1.80363800  |
| H | -4.56042800 | -1.01973700 | 2.04641300  |
| C | 2.21346900  | -0.64960800 | -2.61258000 |
| H | 3.20637900  | -0.24605300 | -2.40255400 |
| H | 2.13504700  | -0.82902100 | -3.69438400 |
| H | 1.49381500  | 0.13080800  | -2.35011700 |
| C | 2.95599900  | -2.93852400 | -1.72020400 |
| C | 4.23040600  | -2.73661200 | -2.28101100 |
| C | 2.75268600  | -4.16650400 | -1.06228000 |
| C | 5.24039900  | -3.68801200 | -2.17604500 |
| H | 4.43756500  | -1.82527700 | -2.83151300 |
| C | 3.75742500  | -5.11995000 | -0.96265600 |
| H | 1.80031200  | -4.38161300 | -0.58834200 |
| C | 5.01479400  | -4.89060900 | -1.51456200 |
| H | 6.20832600  | -3.48832800 | -2.62871000 |
| H | 3.55404900  | -6.04860300 | -0.43612800 |
| H | 5.79996100  | -5.63652500 | -1.43489700 |
| H | 0.31580800  | -3.20321800 | -1.24873700 |
| H | -0.43255400 | -0.76567700 | -2.94197100 |
| O | 3.28037600  | -0.40572200 | 0.03614700  |
| C | 1.91743100  | -2.06577600 | 1.13491500  |
| C | 3.07926900  | -2.69546900 | 1.58351600  |
| C | 0.67533400  | -2.59369500 | 1.50358400  |
| C | 2.99818200  | -3.82122800 | 2.39882700  |
| H | 4.04775400  | -2.31719300 | 1.27747000  |
| C | 0.59468000  | -3.73074000 | 2.29467600  |
| H | -0.22262600 | -2.10778300 | 1.13847800  |
| C | 1.76056300  | -4.34672200 | 2.75212500  |
| H | 3.91121100  | -4.29971000 | 2.73950500  |
| H | -0.37712600 | -4.14322900 | 2.55305300  |
| H | 1.70049800  | -5.23379000 | 3.37577200  |
| C | 3.75277500  | 0.56341000  | 0.85099700  |
| C | 5.11625300  | 0.99602200  | 0.42834700  |
| C | 5.67179300  | 2.11445200  | 1.05289800  |
| C | 5.83124200  | 0.31741400  | -0.56153700 |
| C | 6.93123200  | 2.56504100  | 0.67563500  |
| H | 5.09781300  | 2.61878300  | 1.82348600  |
| C | 7.09448300  | 0.76832300  | -0.93079200 |
| H | 5.40177700  | -0.56459500 | -1.02488600 |
| C | 7.64195000  | 1.89329100  | -0.31850900 |
| H | 7.36155600  | 3.43825400  | 1.15675000  |
| H | 7.65227900  | 0.23935900  | -1.69767000 |
| H | 8.62636000  | 2.24601800  | -0.61255900 |

|   |              |              |              |
|---|--------------|--------------|--------------|
| O | 3. 16193300  | 1. 01164200  | 1. 80295700  |
| C | -1. 39054800 | 4. 15795100  | -2. 71449200 |
| H | -1. 32591900 | 5. 24152000  | -2. 85942100 |
| H | -0. 69160100 | 3. 69610300  | -3. 42387500 |
| C | -2. 80370700 | 3. 61681500  | -2. 94977400 |
| H | -3. 50603300 | 4. 16363600  | -2. 30762100 |
| H | -3. 13492500 | 3. 75220900  | -3. 98530300 |
| H | -2. 14455800 | 1. 61422500  | -3. 31618100 |
| C | -3. 01185800 | -2. 02131800 | 3. 13713400  |
| C | -2. 50911700 | -0. 76866300 | 3. 86183600  |
| H | -1. 96479300 | -1. 01144800 | 4. 78054500  |
| H | -3. 37267700 | -0. 15406400 | 4. 14672100  |
| H | -3. 74603200 | -2. 58152000 | 3. 72594900  |
| H | -2. 17109700 | -2. 69775800 | 2. 93748300  |
| C | 0. 49794500  | 3. 90787100  | -0. 99545800 |
| C | 0. 99214900  | 5. 02605300  | -0. 32110000 |
| C | 1. 40247700  | 2. 93874700  | -1. 43290000 |
| C | 2. 35761700  | 5. 17140100  | -0. 08756300 |
| H | 0. 29894700  | 5. 78526800  | 0. 03449100  |
| C | 2. 76517300  | 3. 07774800  | -1. 20227000 |
| H | 1. 03390700  | 2. 05098800  | -1. 93631200 |
| C | 3. 24848700  | 4. 19558400  | -0. 52660800 |
| H | 2. 72423400  | 6. 04649900  | 0. 44158000  |
| H | 3. 44938700  | 2. 30473600  | -1. 53950100 |
| H | 4. 31328000  | 4. 29790600  | -0. 34011800 |
| C | -4. 03302900 | 1. 35780300  | -2. 38241700 |
| C | -3. 96826600 | -0. 04086600 | -2. 42507600 |
| C | -5. 25352100 | 1. 95462200  | -2. 06141800 |
| C | -5. 07095100 | -0. 82409300 | -2. 11078100 |
| H | -3. 02801700 | -0. 51808700 | -2. 68307500 |
| C | -6. 36742600 | 1. 17208300  | -1. 75584700 |
| H | -5. 34448900 | 3. 03656800  | -2. 03553300 |
| C | -6. 27696500 | -0. 21682200 | -1. 76438900 |
| H | -4. 98390800 | -1. 90638300 | -2. 12645600 |
| H | -7. 30774300 | 1. 65502200  | -1. 50549200 |
| H | -7. 14021800 | -0. 82511100 | -1. 51080600 |
| C | -3. 95749100 | -2. 63916400 | 0. 81270300  |
| C | -5. 28783200 | -3. 01251200 | 0. 60935600  |
| C | -2. 96398900 | -3. 29871800 | 0. 08163600  |
| C | -5. 62321300 | -4. 01058400 | -0. 30216400 |
| H | -6. 07409000 | -2. 50604800 | 1. 16448300  |
| C | -3. 29372900 | -4. 29156000 | -0. 83502500 |
| H | -1. 92190100 | -3. 02016500 | 0. 20744300  |
| C | -4. 62600700 | -4. 65026400 | -1. 03304500 |

|   |             |             |             |
|---|-------------|-------------|-------------|
| H | -6.66533100 | -4.28036100 | -0.44739300 |
| H | -2.50568100 | -4.78221500 | -1.39916300 |
| H | -4.88340000 | -5.42221900 | -1.75190100 |
| C | -1.23560600 | 1.41480000  | 3.11827200  |
| C | -2.07236100 | 2.30692900  | 3.79367500  |
| C | -0.04695100 | 1.90028900  | 2.55784400  |
| C | -1.74591000 | 3.65953200  | 3.87777000  |
| H | -2.99223000 | 1.95633700  | 4.25351400  |
| C | 0.27768600  | 3.24968700  | 2.63903300  |
| H | 0.62625500  | 1.22493400  | 2.03713400  |
| C | -0.57703100 | 4.13765200  | 3.29039200  |
| H | -2.40913400 | 4.33949900  | 4.40531800  |
| H | 1.20067400  | 3.59739900  | 2.18607000  |
| H | -0.32746300 | 5.19316700  | 3.35321400  |

### TS3\_a4

|    |             |             |             |
|----|-------------|-------------|-------------|
| C  | -3.00183900 | 2.42853900  | 0.43141700  |
| C  | -3.68599300 | 1.17594500  | 1.00689100  |
| H  | -3.76219300 | 3.12462300  | 0.05701200  |
| H  | -2.44921500 | 2.94756900  | 1.22147600  |
| H  | -4.15212100 | 1.42095100  | 1.96840200  |
| H  | -4.48359300 | 0.84154500  | 0.33360000  |
| P  | -2.55620400 | -0.28732000 | 1.17947300  |
| P  | -1.75341000 | 2.05548300  | -0.89299300 |
| C  | -0.36946200 | -1.12410200 | -2.32089400 |
| C  | 1.00587200  | -1.30234300 | -2.23482000 |
| H  | -0.72553500 | -0.37554500 | -3.02821200 |
| C  | 1.81472300  | -1.24639000 | 0.50881300  |
| C  | 1.69459000  | -2.35183700 | -1.59525200 |
| Cu | -0.81708200 | -0.03966200 | -0.49265600 |
| O  | 0.64753300  | -0.87848200 | 0.69354800  |
| C  | -1.74858700 | -0.09902400 | 2.86977400  |
| C  | -3.74617000 | -1.61870000 | 1.75359800  |
| H  | -4.70471100 | -1.12601700 | 1.96342000  |
| C  | -0.98133200 | 3.73356900  | -1.21846800 |
| H  | -1.36989600 | 4.41439700  | -0.45137700 |
| C  | -2.78583200 | 2.08741000  | -2.46239000 |
| C  | 0.83778500  | -3.51346800 | -1.15162300 |
| H  | 1.36764800  | -4.22003300 | -0.51089100 |
| H  | 0.42791900  | -4.06947200 | -2.00759600 |
| H  | -0.00718800 | -3.13654300 | -0.56507100 |
| C  | 3.10954200  | -2.59950200 | -1.94502400 |
| C  | 3.70684100  | -3.85590300 | -1.73893800 |

|   |              |              |              |
|---|--------------|--------------|--------------|
| C | 3. 94539900  | -1. 59750400 | -2. 47868800 |
| C | 5. 04854900  | -4. 09183900 | -2. 02581400 |
| H | 3. 11950400  | -4. 67545800 | -1. 34231100 |
| C | 5. 28228300  | -1. 83192600 | -2. 76917500 |
| H | 3. 54961900  | -0. 60336300 | -2. 65781200 |
| C | 5. 85355500  | -3. 08281700 | -2. 53965800 |
| H | 5. 46334900  | -5. 07956500 | -1. 84304500 |
| H | 5. 88565800  | -1. 02517600 | -3. 17947900 |
| H | 6. 90037800  | -3. 26432900 | -2. 76353900 |
| C | 2. 40125500  | -2. 39437900 | 1. 23786400  |
| C | 3. 76432400  | -2. 69774000 | 1. 17748100  |
| C | 1. 55137700  | -3. 19890400 | 2. 00513700  |
| C | 4. 26577300  | -3. 79326100 | 1. 87241400  |
| H | 4. 42932900  | -2. 08697200 | 0. 57701400  |
| C | 2. 05538600  | -4. 29315600 | 2. 69417900  |
| H | 0. 49586600  | -2. 95030500 | 2. 04859000  |
| C | 3. 41589800  | -4. 59434800 | 2. 62881100  |
| H | 5. 32516100  | -4. 02305200 | 1. 81153200  |
| H | 1. 38916900  | -4. 91123200 | 3. 28905000  |
| H | 3. 81062200  | -5. 45082400 | 3. 16760100  |
| H | 1. 60244200  | -0. 50206000 | -2. 66899900 |
| H | -1. 04163900 | -1. 96768600 | -2. 16417800 |
| C | 3. 21792500  | 0. 52990000  | 1. 10297900  |
| O | 2. 78602700  | -0. 28652700 | 0. 10972900  |
| O | 2. 67597100  | 0. 62368300  | 2. 17890700  |
| C | 4. 45200000  | 1. 28168700  | 0. 74610600  |
| C | 5. 24523500  | 0. 93103600  | -0. 34565300 |
| C | 4. 82557500  | 2. 34433500  | 1. 57136000  |
| C | 6. 40237300  | 1. 65315800  | -0. 61985300 |
| H | 4. 96230200  | 0. 08886300  | -0. 96564700 |
| C | 5. 97825700  | 3. 06764300  | 1. 29166500  |
| H | 4. 19950000  | 2. 58979700  | 2. 42274900  |
| C | 6. 76714400  | 2. 72404000  | 0. 19376800  |
| H | 7. 02365400  | 1. 37336300  | -1. 46558400 |
| H | 6. 26586700  | 3. 89712600  | 1. 93068700  |
| H | 7. 67171100  | 3. 28563100  | -0. 02172600 |
| C | -3. 15459700 | -2. 09607500 | 3. 09851600  |
| C | -2. 66646700 | -0. 85091800 | 3. 84254200  |
| H | -0. 81176600 | -0. 66011400 | 2. 77016300  |
| C | -1. 39472300 | 1. 34126900  | 3. 14787900  |
| C | -2. 22932300 | 2. 21109800  | 3. 85387800  |
| C | -0. 22283600 | 1. 85439500  | 2. 57812600  |
| C | -1. 91909500 | 3. 56661300  | 3. 95636900  |
| H | -3. 13625300 | 1. 84158100  | 4. 32385900  |

|   |             |             |             |
|---|-------------|-------------|-------------|
| C | 0.08636900  | 3.20612300  | 2.67591400  |
| H | 0.45328000  | 1.18265500  | 2.05884100  |
| C | -0.76829800 | 4.07215400  | 3.35704400  |
| H | -2.58147400 | 4.22780200  | 4.50812200  |
| H | 0.99806900  | 3.57599400  | 2.21604300  |
| H | -0.53187100 | 5.12954600  | 3.43638900  |
| C | -3.98006900 | -2.72016600 | 0.74816600  |
| C | -5.26676600 | -3.21205600 | 0.52297000  |
| C | -2.91763700 | -3.28061600 | 0.03300400  |
| C | -5.49055500 | -4.22967800 | -0.40205400 |
| H | -6.10558500 | -2.78419000 | 1.06716200  |
| C | -3.13497700 | -4.29139000 | -0.89618500 |
| H | -1.91167100 | -2.90064000 | 0.18888900  |
| C | -4.42586900 | -4.76887200 | -1.11949100 |
| H | -6.49951500 | -4.59717200 | -0.56648600 |
| H | -2.29292100 | -4.70235300 | -1.44587200 |
| H | -4.59944600 | -5.55540300 | -1.84782600 |
| C | -1.52034200 | 4.17545300  | -2.60509400 |
| C | -2.91385100 | 3.57746300  | -2.79923200 |
| H | -2.14764600 | 1.62328700  | -3.22662900 |
| C | -4.03978300 | 1.25856500  | -2.32529100 |
| C | -5.29632900 | 1.82100900  | -2.09284700 |
| C | -3.93006700 | -0.13793800 | -2.34160200 |
| C | -6.40451200 | 1.00946200  | -1.84866500 |
| H | -5.42282800 | 2.89939700  | -2.09123400 |
| C | -5.02958100 | -0.94936100 | -2.09448300 |
| H | -2.96278200 | -0.59547400 | -2.52302600 |
| C | -6.27335500 | -0.37554600 | -1.83595000 |
| H | -7.37241500 | 1.46745200  | -1.66561600 |
| H | -4.91028000 | -2.02844700 | -2.09253900 |
| H | -7.13301300 | -1.00738800 | -1.63302700 |
| C | 0.52788800  | 3.72933700  | -1.15214000 |
| C | 1.21113300  | 4.72423100  | -0.45266300 |
| C | 1.27207500  | 2.75879800  | -1.83229200 |
| C | 2.60455300  | 4.75758600  | -0.43817300 |
| H | 0.64589500  | 5.48017000  | 0.08806100  |
| C | 2.66038100  | 2.79045300  | -1.82096300 |
| H | 0.76038500  | 1.95773500  | -2.36207300 |
| C | 3.33266000  | 3.79469000  | -1.12807900 |
| H | 3.12096400  | 5.53674300  | 0.11525200  |
| H | 3.22324100  | 2.02059100  | -2.34040400 |
| H | 4.41792300  | 3.80744100  | -1.10740200 |
| H | -3.89885000 | -2.66261300 | 3.66854800  |
| H | -2.31076700 | -2.77199500 | 2.90672100  |

|   |             |             |             |
|---|-------------|-------------|-------------|
| H | -3.53662000 | -0.23981100 | 4.11499200  |
| H | -2.14034500 | -1.09989300 | 4.77052400  |
| H | -3.61754000 | 4.06982100  | -2.11627000 |
| H | -3.29056000 | 3.72860200  | -3.81719500 |
| H | -1.51820800 | 5.26719200  | -2.68843600 |
| H | -0.84853100 | 3.79441700  | -3.38409500 |

**TS3\_b1**

|    |             |             |             |
|----|-------------|-------------|-------------|
| C  | 2.70346800  | -1.94829900 | 0.86417400  |
| C  | 1.56959000  | -2.97962000 | 0.84406000  |
| H  | 3.34159400  | -2.07593300 | -0.01855300 |
| H  | 3.33360100  | -2.10403000 | 1.74789600  |
| H  | 1.08569100  | -3.02882600 | 1.82660600  |
| H  | 1.97818100  | -3.97458400 | 0.63336500  |
| P  | 0.19764100  | -2.57114300 | -0.33804600 |
| P  | 2.13214000  | -0.18186200 | 0.79063500  |
| C  | 0.18555500  | 0.53499600  | -2.58076800 |
| C  | -0.51202600 | 1.72542700  | -2.39805200 |
| H  | 1.25919800  | 0.63998200  | -2.72500000 |
| C  | -1.96526200 | 1.75029200  | 0.00654400  |
| C  | -1.88533300 | 2.03950800  | -2.37245600 |
| Cu | 0.22063900  | -0.18121300 | -0.52882400 |
| O  | -1.59198900 | 0.58131400  | 0.15415700  |
| C  | -1.01747100 | -3.93535600 | 0.07060600  |
| H  | -0.43714700 | -4.69433300 | 0.61353300  |
| C  | 0.67003200  | -3.33685700 | -1.99927000 |
| C  | 1.87697400  | 0.35035300  | 2.57218600  |
| H  | 1.17484000  | 1.18641700  | 2.50906900  |
| C  | 3.77727200  | 0.69842000  | 0.61845100  |
| C  | -2.20905600 | 3.51193100  | -2.52813700 |
| C  | -3.36531600 | 2.18868700  | 0.16141600  |
| C  | -3.69894200 | 3.51670200  | 0.44564100  |
| C  | -4.38619400 | 1.24333600  | 0.01412800  |
| C  | -5.03143800 | 3.88657600  | 0.59597600  |
| H  | -2.91591100 | 4.26001400  | 0.54762000  |
| C  | -5.71487900 | 1.61818700  | 0.15710300  |
| H  | -4.12981900 | 0.22235100  | -0.24041500 |
| C  | -6.04227200 | 2.93976900  | 0.45356400  |
| H  | -5.27816100 | 4.91938700  | 0.82338800  |
| H  | -6.49559600 | 0.87513000  | 0.02569300  |
| H  | -7.08210400 | 3.23134900  | 0.56918500  |
| H  | 0.12721900  | 2.57974100  | -2.16303000 |
| H  | -0.27747700 | -0.29753400 | -3.10780500 |

|   |             |             |             |
|---|-------------|-------------|-------------|
| C | -0.55430000 | 2.90822200  | 1.50279400  |
| O | -1.00525000 | 2.78195500  | 0.23883300  |
| O | -1.01848800 | 2.32277100  | 2.45349300  |
| C | 0.60314200  | 3.84319200  | 1.59392400  |
| C | 1.14809000  | 4.46628200  | 0.46996700  |
| C | 1.16888500  | 4.05529600  | 2.85418800  |
| C | 2.27071900  | 5.27671900  | 0.60278100  |
| H | 0.69680600  | 4.30453400  | -0.50300000 |
| C | 2.28490100  | 4.87229100  | 2.98508100  |
| H | 0.72481900  | 3.56408600  | 3.71406700  |
| C | 2.84040000  | 5.47724000  | 1.85792500  |
| H | 2.70618400  | 5.74255500  | -0.27541300 |
| H | 2.72781300  | 5.03228700  | 3.96324200  |
| H | 3.72022800  | 6.10580300  | 1.95822800  |
| H | -1.41347500 | 4.12547600  | -2.09133800 |
| H | -2.30618100 | 3.80451800  | -3.58356500 |
| H | -3.14376900 | 3.78995700  | -2.02799200 |
| C | -2.93541600 | 1.07363100  | -2.74600300 |
| C | -4.16368200 | 1.51749900  | -3.27096600 |
| C | -2.82318000 | -0.31152600 | -2.50368700 |
| C | -5.20890300 | 0.64083200  | -3.53836100 |
| H | -4.31465700 | 2.57330500  | -3.46666000 |
| C | -3.87370900 | -1.18586600 | -2.75807400 |
| H | -1.92738600 | -0.70501000 | -2.04341400 |
| C | -5.07601500 | -0.72056200 | -3.28275700 |
| H | -6.13868700 | 1.03096100  | -3.94394200 |
| H | -3.75311100 | -2.24191900 | -2.52814500 |
| H | -5.89355100 | -1.40603800 | -3.48629200 |
| C | -1.36079000 | -4.54109100 | -1.30489200 |
| H | -1.89137100 | -5.49196200 | -1.18671700 |
| H | -2.02514100 | -3.86284100 | -1.85685300 |
| C | -0.03147200 | -4.70346800 | -2.04726400 |
| H | 0.56411400  | -5.46877500 | -1.53466000 |
| H | -0.16788100 | -5.03724800 | -3.08138200 |
| H | 0.17604200  | -2.68498400 | -2.73009500 |
| C | -2.20129700 | -3.56108100 | 0.93147900  |
| C | -2.67445100 | -4.48898900 | 1.86458500  |
| C | -2.84487900 | -2.32525800 | 0.83073200  |
| C | -3.76490700 | -4.19667000 | 2.67781500  |
| H | -2.17479500 | -5.45061200 | 1.96116200  |
| C | -3.93044500 | -2.02697000 | 1.65060100  |
| H | -2.47648300 | -1.56654300 | 0.14734200  |
| C | -4.39635200 | -2.95973300 | 2.57346800  |
| H | -4.11371200 | -4.93043000 | 3.39890200  |

|   |             |             |             |
|---|-------------|-------------|-------------|
| H | -4.39979000 | -1.05073400 | 1.58128700  |
| H | -5.23888700 | -2.71905600 | 3.21515800  |
| C | 2.15607000  | -3.26219100 | -2.24661200 |
| C | 3.04629900  | -4.26233800 | -1.84472900 |
| C | 2.68561600  | -2.09164900 | -2.80273000 |
| C | 4.42258300  | -4.08217900 | -1.96636000 |
| H | 2.67199200  | -5.18979000 | -1.42106700 |
| C | 4.05809300  | -1.90389200 | -2.91906800 |
| H | 2.00822100  | -1.31202300 | -3.13425100 |
| C | 4.93484000  | -2.89878000 | -2.49165600 |
| H | 5.09687500  | -4.87067000 | -1.64435400 |
| H | 4.43816900  | -0.97580800 | -3.33512200 |
| H | 6.00808200  | -2.75777400 | -2.57923000 |
| C | 3.23217900  | 0.90920200  | 3.02588600  |
| H | 3.11541200  | 1.56140900  | 3.89848900  |
| H | 3.91854100  | 0.10139400  | 3.31014400  |
| C | 3.81669400  | 1.66036500  | 1.82525000  |
| H | 3.21003900  | 2.54680400  | 1.60653900  |
| H | 4.83968500  | 2.00683200  | 2.00768400  |
| H | 4.55030300  | -0.06603800 | 0.77235900  |
| C | 1.20188000  | -0.74501400 | 3.36021400  |
| C | 1.90561400  | -1.64748800 | 4.16017800  |
| C | -0.17722500 | -0.93215900 | 3.18840800  |
| C | 1.25489400  | -2.72809800 | 4.75428300  |
| H | 2.97212200  | -1.51969300 | 4.32190000  |
| C | -0.82545400 | -2.01187600 | 3.77775900  |
| H | -0.74191400 | -0.23468700 | 2.57389700  |
| C | -0.10905500 | -2.92000400 | 4.55590800  |
| H | 1.82078100  | -3.42125100 | 5.37059400  |
| H | -1.89048600 | -2.14897300 | 3.61915900  |
| H | -0.61548900 | -3.76767400 | 5.00817200  |
| C | 4.01196800  | 1.35191900  | -0.72064200 |
| C | 5.21388000  | 1.15619700  | -1.40269300 |
| C | 3.04439300  | 2.17807500  | -1.29910800 |
| C | 5.44597700  | 1.77001900  | -2.63218700 |
| H | 5.97425200  | 0.50923300  | -0.97117200 |
| C | 3.26939100  | 2.79134900  | -2.52587200 |
| H | 2.09369100  | 2.31729600  | -0.79351000 |
| C | 4.47306100  | 2.58825300  | -3.19885000 |
| H | 6.38805600  | 1.60537600  | -3.14753300 |
| H | 2.49656700  | 3.41716100  | -2.96402200 |
| H | 4.64800000  | 3.06181200  | -4.16023000 |

TS3\_b2



|    |             |             |             |
|----|-------------|-------------|-------------|
| C  | 3.05857600  | 2.34605700  | 0.71396600  |
| C  | 1.74990800  | 2.92506600  | 1.27743800  |
| H  | 3.73889400  | 3.16088300  | 0.43578100  |
| H  | 3.56281500  | 1.74979400  | 1.48218600  |
| H  | 1.92868900  | 3.28873400  | 2.29706800  |
| H  | 1.43958200  | 3.79044700  | 0.68093300  |
| P  | 0.28889900  | 1.76547500  | 1.24974800  |
| P  | 2.83920900  | 1.18520600  | -0.71072300 |
| C  | 0.37079400  | -0.56243000 | -2.68941200 |
| C  | 0.02570500  | -1.88553900 | -2.44587200 |
| H  | 1.36637000  | -0.38721300 | -3.09585600 |
| C  | -1.01635900 | -2.27775400 | 0.14654300  |
| C  | -1.22223200 | -2.48937300 | -2.17234100 |
| Cu | 0.77197400  | 0.13125500  | -0.62479000 |
| O  | -0.43513400 | -1.19995700 | 0.33894300  |
| C  | 0.48776000  | 0.78420700  | 2.84516700  |
| C  | -1.02054900 | 2.90527700  | 2.00121500  |
| H  | -0.53061300 | 3.87896800  | 2.12759000  |
| C  | 4.59722000  | 0.58593200  | -0.98929000 |
| H  | 5.21347600  | 1.08708800  | -0.23225300 |
| C  | 2.84923300  | 2.30266000  | -2.22210800 |
| C  | -1.27196800 | -3.98970400 | -2.39663200 |
| H  | 0.86968700  | -2.57822700 | -2.38415500 |
| H  | -0.38826300 | 0.14348100  | -3.02242400 |
| C  | -1.31941800 | 2.32211400  | 3.40435700  |
| C  | -0.03401400 | 1.70926400  | 3.94897900  |
| H  | -0.22616400 | -0.04085000 | 2.72364600  |
| C  | 1.86788400  | 0.19940900  | 3.01259500  |
| C  | 2.87156000  | 0.81103200  | 3.76795400  |
| C  | 2.17946300  | -0.98295200 | 2.33056600  |
| C  | 4.16093800  | 0.27887500  | 3.80239300  |
| H  | 2.66069800  | 1.71726800  | 4.32810000  |
| C  | 3.46437000  | -1.50887100 | 2.35112300  |
| H  | 1.39210800  | -1.48089600 | 1.77535700  |
| C  | 4.46683400  | -0.87139800 | 3.08103600  |
| H  | 4.92814400  | 0.77129700  | 4.39380100  |
| H  | 3.68365400  | -2.41613300 | 1.79440100  |
| H  | 5.47293000  | -1.28038100 | 3.09722000  |
| C  | -2.27319300 | 3.10229800  | 1.18500300  |
| C  | -3.10062300 | 2.01756900  | 0.87967400  |
| C  | -2.67352000 | 4.37915900  | 0.78737800  |
| C  | -4.31527200 | 2.20629400  | 0.23090000  |
| H  | -2.79533800 | 1.01644100  | 1.16956700  |

|   |             |             |             |
|---|-------------|-------------|-------------|
| C | -3.87687100 | 4.57139300  | 0.11152900  |
| H | -2.03864600 | 5.23267700  | 1.01474200  |
| C | -4.70562600 | 3.48637100  | -0.16034800 |
| H | -4.95020300 | 1.34941100  | 0.02597200  |
| H | -4.17270700 | 5.57300800  | -0.18843800 |
| H | -5.65305600 | 3.63576400  | -0.67000300 |
| C | 4.99314100  | 1.14178800  | -2.37911700 |
| C | 4.33369400  | 2.51271100  | -2.54045100 |
| H | 2.41862000  | 1.68802500  | -3.02324100 |
| C | 1.95469600  | 3.50114900  | -2.02138700 |
| C | 2.44324600  | 4.76322000  | -1.67868500 |
| C | 0.56675800  | 3.31939100  | -2.08369400 |
| C | 1.56795800  | 5.80545900  | -1.37330000 |
| H | 3.51323400  | 4.94338000  | -1.63636000 |
| C | -0.30835000 | 4.35179900  | -1.77111800 |
| H | 0.16882000  | 2.34372600  | -2.35093700 |
| C | 0.19212100  | 5.60059800  | -1.40490600 |
| H | 1.96841500  | 6.77901600  | -1.10531000 |
| H | -1.37947700 | 4.17797200  | -1.79968800 |
| H | -0.48930700 | 6.40866200  | -1.15541800 |
| C | 4.79080700  | -0.90509400 | -0.85411900 |
| C | 5.87275100  | -1.41059400 | -0.13167400 |
| C | 3.91802200  | -1.80935800 | -1.46661200 |
| C | 6.07796000  | -2.78292500 | -0.01553700 |
| H | 6.55646500  | -0.72073400 | 0.35708700  |
| C | 4.12003700  | -3.18086200 | -1.35736400 |
| H | 3.05713700  | -1.43976900 | -2.01805900 |
| C | 5.20037600  | -3.67364100 | -0.62745500 |
| H | 6.92332400  | -3.15570400 | 0.55550400  |
| H | 3.42230700  | -3.86571300 | -1.83094500 |
| H | 5.35711800  | -4.74468700 | -0.53822100 |
| C | -0.36825300 | -3.58802000 | 0.40465800  |
| C | -1.10431300 | -4.71575800 | 0.77302700  |
| C | 1.02266300  | -3.68738000 | 0.28695200  |
| C | -0.45910600 | -5.92427000 | 1.01822900  |
| H | -2.18182500 | -4.64254900 | 0.86761300  |
| C | 1.66302100  | -4.89397900 | 0.53406600  |
| H | 1.59824800  | -2.81427500 | -0.00541700 |
| C | 0.92394800  | -6.01901100 | 0.89917300  |
| H | -1.04162200 | -6.79465500 | 1.30584000  |
| H | 2.74400000  | -4.95353700 | 0.44564300  |
| H | 1.42528900  | -6.96283600 | 1.09204000  |
| O | -2.41835200 | -2.30376000 | 0.35651600  |
| C | -2.92532300 | -1.61861100 | 1.40628600  |

|   |             |             |             |
|---|-------------|-------------|-------------|
| O | -2.28082100 | -1.26356400 | 2.36786800  |
| C | -4.38166700 | -1.34976200 | 1.25105000  |
| C | -5.07012800 | -1.65112400 | 0.07515600  |
| C | -5.04374600 | -0.72065300 | 2.30961900  |
| C | -6.41544100 | -1.31636900 | -0.04058300 |
| H | -4.55121600 | -2.12459800 | -0.74953400 |
| C | -6.38774500 | -0.39293000 | 2.19160600  |
| H | -4.48690800 | -0.48603200 | 3.21072000  |
| C | -7.07405600 | -0.68839200 | 1.01367200  |
| H | -6.93956800 | -1.53632700 | -0.96535300 |
| H | -6.89923600 | 0.09950900  | 3.01294100  |
| H | -8.12372100 | -0.42552300 | 0.91729900  |
| C | -2.47151700 | -1.74559600 | -2.47401200 |
| C | -3.53130000 | -2.36362300 | -3.16132400 |
| C | -2.65428200 | -0.39897200 | -2.10783900 |
| C | -4.68360700 | -1.66474800 | -3.51166000 |
| H | -3.45379400 | -3.40691000 | -3.44698400 |
| C | -3.79470400 | 0.30448100  | -2.47620600 |
| H | -1.90600300 | 0.09818400  | -1.49985800 |
| C | -4.81723900 | -0.31886700 | -3.18661300 |
| H | -5.47423000 | -2.17729100 | -4.05396000 |
| H | -3.88666100 | 1.34810600  | -2.19325300 |
| H | -5.70723200 | 0.23417800  | -3.47303400 |
| H | -2.08201400 | -4.46138600 | -1.82755200 |
| H | -1.42468100 | -4.23914300 | -3.45610000 |
| H | -0.33711600 | -4.46502800 | -2.08575700 |
| H | -1.72837000 | 3.09924700  | 4.05921300  |
| H | -2.07728800 | 1.53534600  | 3.31616600  |
| H | 0.68696400  | 2.50632300  | 4.17293800  |
| H | -0.20428300 | 1.15491200  | 4.87859300  |
| H | 6.08272700  | 1.18633900  | -2.47882300 |
| H | 4.62607400  | 0.46124200  | -3.15809900 |
| H | 4.47485700  | 2.92654000  | -3.54507200 |
| H | 4.78837300  | 3.21600300  | -1.83085900 |

### TS3\_b3

|   |             |            |             |
|---|-------------|------------|-------------|
| C | -3.37513500 | 1.44546300 | 1.02927300  |
| C | -2.53230300 | 2.65432500 | 0.60301600  |
| H | -4.19892500 | 1.29650700 | 0.32217900  |
| H | -3.82009000 | 1.62969000 | 2.01415600  |
| H | -1.93965700 | 3.01989300 | 1.45027200  |
| H | -3.19101000 | 3.47215500 | 0.28755800  |
| P | -1.28191100 | 2.28719600 | -0.71787000 |

|    |             |             |             |
|----|-------------|-------------|-------------|
| P  | -2.44705900 | -0.16080100 | 1.03648000  |
| C  | -0.15800400 | -0.88553100 | -2.38826500 |
| C  | 0.42235300  | -2.06713500 | -1.93980900 |
| H  | -1.17981000 | -0.96900000 | -2.75825000 |
| C  | 1.68325700  | -1.74119800 | 0.61770100  |
| C  | 1.76305000  | -2.42043600 | -1.66023100 |
| Cu | -0.64285400 | 0.02229500  | -0.49777500 |
| O  | 0.92007000  | -0.75778400 | 0.61613700  |
| C  | -0.46877900 | 3.96704100  | -0.89497400 |
| H  | -1.14166200 | 4.68385300  | -0.40538300 |
| C  | -2.19628000 | 2.42543400  | -2.36672300 |
| C  | -1.70917300 | -0.31450500 | 2.75910400  |
| H  | -0.86276500 | -0.99773700 | 2.61855300  |
| C  | -3.84105400 | -1.36082400 | 1.38233300  |
| C  | 2.00474000  | -3.92337400 | -1.64427000 |
| H  | -0.29030000 | -2.86677300 | -1.72130700 |
| H  | 0.45202200  | -0.12580700 | -2.87475300 |
| O  | 3.01702600  | -1.32720100 | 0.84367700  |
| C  | 1.23258500  | -3.04995600 | 1.17907200  |
| C  | -0.13558400 | -3.33515300 | 1.08710500  |
| C  | 2.06887700  | -3.98148800 | 1.79534300  |
| C  | -0.65127200 | -4.53670500 | 1.54959300  |
| H  | -0.78777000 | -2.60283700 | 0.62754900  |
| C  | 1.54633500  | -5.17876400 | 2.28107100  |
| H  | 3.12979200  | -3.79369300 | 1.88034800  |
| C  | 0.19284600  | -5.46893300 | 2.15213000  |
| H  | -1.71136100 | -4.74580000 | 1.43181200  |
| H  | 2.21257700  | -5.89260600 | 2.75642200  |
| H  | -0.20425100 | -6.41065600 | 2.51938800  |
| C  | 4.19159400  | -1.87577000 | 0.47216800  |
| C  | 5.27387300  | -0.85158400 | 0.47799300  |
| C  | 5.09375400  | 0.41988800  | 1.02583900  |
| C  | 6.49285200  | -1.19341100 | -0.10781000 |
| C  | 6.13526500  | 1.33978000  | 0.99151500  |
| H  | 4.13865800  | 0.68146800  | 1.46749300  |
| C  | 7.52582100  | -0.26464900 | -0.15648700 |
| H  | 6.60603200  | -2.18288300 | -0.53694100 |
| C  | 7.34902100  | 1.00169500  | 0.39541500  |
| H  | 5.99839800  | 2.32465900  | 1.42936200  |
| H  | 8.46850500  | -0.52732200 | -0.62680000 |
| H  | 8.15665100  | 1.72731500  | 0.36159500  |
| O  | 4.37586400  | -3.03654800 | 0.19311500  |
| H  | 2.91187500  | -4.18708600 | -1.09809000 |
| H  | 1.16812600  | -4.43922800 | -1.16144800 |

|   |              |              |              |
|---|--------------|--------------|--------------|
| H | 2. 08693900  | -4. 32990300 | -2. 66316600 |
| C | 2. 86522700  | -1. 56186000 | -2. 16392000 |
| C | 3. 98140300  | -2. 11319700 | -2. 81631000 |
| C | 2. 86016100  | -0. 16737500 | -1. 98522300 |
| C | 5. 01741600  | -1. 31460200 | -3. 28694300 |
| H | 4. 04901000  | -3. 18745300 | -2. 94855800 |
| C | 3. 89254200  | 0. 63355300  | -2. 46223300 |
| H | 2. 05495600  | 0. 28018500  | -1. 41415800 |
| C | 4. 97881600  | 0. 06736900  | -3. 12089000 |
| H | 5. 86434300  | -1. 77890000 | -3. 78544400 |
| H | 3. 85091000  | 1. 70922000  | -2. 31141700 |
| H | 5. 78962600  | 0. 69122800  | -3. 48494900 |
| C | -0. 53099100 | 4. 24431100  | -2. 40999300 |
| H | -0. 29971800 | 5. 29407200  | -2. 61919600 |
| H | 0. 21768200  | 3. 63511600  | -2. 93328900 |
| C | -1. 94115400 | 3. 85835800  | -2. 86311000 |
| H | -2. 65538900 | 4. 56036000  | -2. 41591800 |
| H | -2. 06315800 | 3. 92347900  | -3. 94949500 |
| H | -1. 64596400 | 1. 74131800  | -3. 02395000 |
| C | 0. 89448400  | 4. 09418800  | -0. 26508300 |
| C | 1. 17004600  | 5. 15051500  | 0. 60536700  |
| C | 1. 90903000  | 3. 17446400  | -0. 54111500 |
| C | 2. 42823600  | 5. 28825600  | 1. 18668400  |
| H | 0. 38886400  | 5. 87065700  | 0. 83722700  |
| C | 3. 16625200  | 3. 30504900  | 0. 03744400  |
| H | 1. 70849700  | 2. 34094500  | -1. 20822000 |
| C | 3. 42983000  | 4. 36314800  | 0. 90575700  |
| H | 2. 62295700  | 6. 11565700  | 1. 86306200  |
| H | 3. 93642500  | 2. 57418200  | -0. 18708700 |
| H | 4. 41165200  | 4. 46694700  | 1. 35886500  |
| C | -3. 62190100 | 1. 93487500  | -2. 27412700 |
| C | -3. 87893000 | 0. 56466100  | -2. 40497900 |
| C | -4. 69326800 | 2. 77661600  | -1. 96112700 |
| C | -5. 15183500 | 0. 04321000  | -2. 20260900 |
| H | -3. 06307900 | -0. 10891900 | -2. 64778300 |
| C | -5. 97168500 | 2. 25993200  | -1. 75901300 |
| H | -4. 53774600 | 3. 84621100  | -1. 85788100 |
| C | -6. 20488100 | 0. 89200000  | -1. 86946200 |
| H | -5. 31611000 | -1. 02578100 | -2. 29923000 |
| H | -6. 78688200 | 2. 93342200  | -1. 51003800 |
| H | -7. 19975100 | 0. 48909200  | -1. 70529500 |
| C | -2. 77806300 | -1. 03729400 | 3. 59134400  |
| H | -2. 34145900 | -1. 48134100 | 4. 49219300  |
| H | -3. 56119500 | -0. 34047300 | 3. 91597500  |

|   |             |             |             |
|---|-------------|-------------|-------------|
| C | -3.40353100 | -2.09055700 | 2.67261700  |
| H | -4.25773200 | -2.59560500 | 3.13684500  |
| H | -2.66004800 | -2.85833800 | 2.43205200  |
| H | -4.71008100 | -0.74078300 | 1.64180700  |
| C | -1.16845200 | 1.01226200  | 3.23957700  |
| C | -1.90822500 | 1.88645800  | 4.03958500  |
| C | 0.08508000  | 1.43380400  | 2.77392600  |
| C | -1.42502600 | 3.16020800  | 4.33813300  |
| H | -2.87488300 | 1.58648400  | 4.43363800  |
| C | 0.56413000  | 2.70567500  | 3.06450600  |
| H | 0.67492900  | 0.76383700  | 2.15437500  |
| C | -0.19473100 | 3.57985700  | 3.84101000  |
| H | -2.01865300 | 3.82539500  | 4.95911900  |
| H | 1.52734800  | 3.01684900  | 2.67106600  |
| H | 0.17630700  | 4.57687700  | 4.06034000  |
| C | -4.25353500 | -2.27437200 | 0.24880600  |
| C | -5.57907500 | -2.71529200 | 0.18910800  |
| C | -3.36737400 | -2.71150800 | -0.73910900 |
| C | -6.00862000 | -3.56707200 | -0.82379400 |
| H | -6.28656400 | -2.37781400 | 0.94338600  |
| C | -3.79068400 | -3.56533200 | -1.75389800 |
| H | -2.34450800 | -2.35000700 | -0.74353500 |
| C | -5.11369000 | -3.99672500 | -1.80143500 |
| H | -7.04468600 | -3.89215600 | -0.85258000 |
| H | -3.08227200 | -3.88535600 | -2.51259900 |
| H | -5.44585700 | -4.65979800 | -2.59451600 |

#### TS3\_b4

|    |             |             |             |
|----|-------------|-------------|-------------|
| C  | 1.53358800  | -3.09915400 | 0.81154100  |
| C  | 2.61676400  | -2.12315000 | 1.28561500  |
| H  | 1.98107800  | -4.08189200 | 0.61757600  |
| H  | 0.78148100  | -3.23364700 | 1.59923900  |
| H  | 2.88954000  | -2.35535900 | 2.32133100  |
| H  | 3.52186700  | -2.23795200 | 0.67825900  |
| P  | 2.16268800  | -0.33266500 | 1.12504000  |
| P  | 0.56067400  | -2.54796800 | -0.67330600 |
| C  | 0.62501000  | 0.89942600  | -2.46500100 |
| C  | -0.60249200 | 1.55652500  | -2.49360600 |
| H  | 0.71901700  | 0.04111300  | -3.13123900 |
| C  | -1.73285800 | 1.82493500  | 0.05545800  |
| C  | -1.03384800 | 2.80225100  | -1.98842500 |
| Cu | 0.45487200  | -0.20415000 | -0.60694800 |
| O  | -0.77441200 | 1.12676700  | 0.41184600  |

|   |              |              |              |
|---|--------------|--------------|--------------|
| C | 1. 25921500  | 0. 14026700  | 2. 71395200  |
| C | 3. 77092900  | 0. 46511700  | 1. 67091100  |
| H | 4. 33024400  | -0. 32064700 | 2. 19756900  |
| C | -0. 59708400 | -4. 02327400 | -0. 84926200 |
| H | -0. 18408200 | -4. 78187700 | -0. 17144600 |
| C | 1. 60451000  | -3. 06137400 | -2. 16361800 |
| C | -2. 32270100 | 3. 32146200  | -2. 59283800 |
| C | -2. 07403300 | 3. 10115200  | 0. 72349600  |
| C | -3. 30504100 | 3. 73911300  | 0. 54012200  |
| C | -1. 11641800 | 3. 69180300  | 1. 55396300  |
| C | -3. 55968200 | 4. 95905300  | 1. 15761100  |
| H | -4. 06558700 | 3. 28183700  | -0. 08413200 |
| C | -1. 36828700 | 4. 91544600  | 2. 15768200  |
| H | -0. 16991000 | 3. 18798000  | 1. 70465900  |
| C | -2. 58990600 | 5. 55508600  | 1. 95893700  |
| H | -4. 51987900 | 5. 44453900  | 1. 01032500  |
| H | -0. 60788000 | 5. 37172600  | 2. 78401400  |
| H | -2. 78706000 | 6. 51264000  | 2. 43196100  |
| H | -1. 41163700 | 0. 97013900  | -2. 93548500 |
| H | 1. 54633100  | 1. 45852500  | -2. 30921800 |
| C | -3. 71459400 | 0. 56363700  | 0. 26617500  |
| O | -2. 84679600 | 1. 18817000  | -0. 55976100 |
| O | -3. 51525500 | 0. 36714600  | 1. 44120400  |
| C | -4. 97128900 | 0. 18303700  | -0. 43800600 |
| C | -5. 14639400 | 0. 37919200  | -1. 80875600 |
| C | -5. 98941600 | -0. 39545600 | 0. 32123500  |
| C | -6. 33204400 | -0. 01763200 | -2. 41891800 |
| H | -4. 34961300 | 0. 82722800  | -2. 39091800 |
| C | -7. 17473200 | -0. 78585300 | -0. 28902100 |
| H | -5. 82562400 | -0. 54298000 | 1. 38330200  |
| C | -7. 34495500 | -0. 60222800 | -1. 66074500 |
| H | -6. 46690200 | 0. 13008800  | -3. 48595700 |
| H | -7. 96632400 | -1. 23663100 | 0. 30205100  |
| H | -8. 26974200 | -0. 91165500 | -2. 13885600 |
| C | 3. 31987400  | 1. 48701800  | 2. 73416300  |
| C | 2. 32085300  | 0. 75893700  | 3. 63624300  |
| H | 0. 58266800  | 0. 93610600  | 2. 38484000  |
| C | 0. 40703800  | -0. 99009700 | 3. 23867900  |
| C | 0. 89082700  | -1. 96035900 | 4. 12153400  |
| C | -0. 89711300 | -1. 12584500 | 2. 74776000  |
| C | 0. 10401500  | -3. 05460500 | 4. 47704000  |
| H | 1. 89126600  | -1. 87505800 | 4. 53713200  |
| C | -1. 68304300 | -2. 21701500 | 3. 10026400  |
| H | -1. 30148500 | -0. 37146600 | 2. 08042300  |

|   |             |             |             |
|---|-------------|-------------|-------------|
| C | -1.18115700 | -3.19358800 | 3.95829500  |
| H | 0.49849500  | -3.79902000 | 5.16333900  |
| H | -2.68658800 | -2.29533100 | 2.69458600  |
| H | -1.79219000 | -4.04904500 | 4.23345900  |
| C | 4.66576800  | 1.03411400  | 0.59812100  |
| C | 6.04856400  | 0.85306200  | 0.67949600  |
| C | 4.15806900  | 1.78766300  | -0.46143700 |
| C | 6.90150700  | 1.41702600  | -0.26587800 |
| H | 6.46286600  | 0.26120600  | 1.49253700  |
| C | 5.00398700  | 2.36525500  | -1.40235000 |
| H | 3.08743000  | 1.91181500  | -0.56376500 |
| C | 6.38208600  | 2.18083700  | -1.30863200 |
| H | 7.97359500  | 1.26237100  | -0.18417600 |
| H | 4.57930100  | 2.95565900  | -2.20898400 |
| H | 7.04595600  | 2.62567000  | -2.04395100 |
| C | -0.36294200 | -4.52886300 | -2.28605200 |
| C | 1.14318000  | -4.47993600 | -2.52874100 |
| H | 1.26988000  | -2.38556900 | -2.96058400 |
| C | 3.08286200  | -2.83585600 | -1.95630900 |
| C | 3.93915800  | -3.84093900 | -1.49754100 |
| C | 3.61464900  | -1.55673500 | -2.16084300 |
| C | 5.28000300  | -3.57129500 | -1.23086400 |
| H | 3.56645400  | -4.84741700 | -1.33527300 |
| C | 4.95269400  | -1.28571900 | -1.89963100 |
| H | 2.96533500  | -0.75787100 | -2.51021200 |
| C | 5.79044100  | -2.29174100 | -1.42431600 |
| H | 5.92531800  | -4.36766700 | -0.87084400 |
| H | 5.34028000  | -0.28484900 | -2.05765800 |
| H | 6.83313600  | -2.07568700 | -1.21224400 |
| C | -2.04389500 | -3.82400300 | -0.47957000 |
| C | -2.56468200 | -4.47006300 | 0.64304400  |
| C | -2.90792600 | -3.06072700 | -1.27117700 |
| C | -3.91641100 | -4.37338400 | 0.96350900  |
| H | -1.90278200 | -5.05617800 | 1.27615100  |
| C | -4.26189100 | -2.98129400 | -0.96800500 |
| H | -2.52252600 | -2.53053000 | -2.13885100 |
| C | -4.77054400 | -3.63513400 | 0.15220400  |
| H | -4.30003500 | -4.88170200 | 1.84365600  |
| H | -4.92448800 | -2.40245200 | -1.60314000 |
| H | -5.82777000 | -3.55948500 | 0.38718700  |
| C | -0.09568800 | 3.82456300  | -1.47857000 |
| C | 1.04071800  | 3.48700200  | -0.72252100 |
| C | -0.34965500 | 5.19674000  | -1.65132200 |
| C | 1.88873400  | 4.45566500  | -0.19748600 |



|   |              |              |              |
|---|--------------|--------------|--------------|
| H | 1. 21073300  | 2. 44488500  | -0. 48403600 |
| C | 0. 49373200  | 6. 16755200  | -1. 12287900 |
| H | -1. 22282700 | 5. 51888000  | -2. 20788000 |
| C | 1. 62592500  | 5. 80710500  | -0. 39808100 |
| H | 2. 76098100  | 4. 14946500  | 0. 37558800  |
| H | 0. 26282900  | 7. 21743400  | -1. 28282900 |
| H | 2. 28917800  | 6. 56591100  | 0. 00690700  |
| H | -2. 85426200 | 3. 99960800  | -1. 91625500 |
| H | -2. 14269100 | 3. 87336300  | -3. 52666100 |
| H | -2. 99846200 | 2. 49580200  | -2. 83234600 |
| H | 4. 18252400  | 1. 87392800  | 3. 28740100  |
| H | 2. 83593000  | 2. 34312600  | 2. 24390000  |
| H | 2. 85558400  | -0. 01631600 | 4. 19896100  |
| H | 1. 85661500  | 1. 42807700  | 4. 36847000  |
| H | -0. 77552100 | -5. 53603400 | -2. 40726300 |
| H | -0. 87854900 | -3. 88068100 | -3. 00551600 |
| H | 1. 62403800  | -5. 22455400 | -1. 88351200 |
| H | 1. 41060700  | -4. 72471700 | -3. 56233200 |

## References:

1. J.-L. Moreau and M. Gaudemar, *J. Organomet. Chem.*, 1976, **108**, 159.
2. (a) M. S. Baird, A. V. Nizovtsev and I. G. Bolesov, *Tetrahedron*, 2002, **58**, 1581; (b) X. Yang, Y. She, Y. Chong, H. Zhai, H. Zhu, B. Chen, G. Huang and R. Yan, *Adv. Synth. Catal.*, 2016, **358**, 3130; (c) K. Kiyokawa, S. Hata, S. Kainuma and S. Minakata, *Chem. Commun.*, 2019, **55**, 458.
3. J. Li, C. Zhou, C. Fu and S. Ma, *Tetrahedron*, 2009, **65**, 3695.
4. S. Hayashi, K. Hirano, H. Yorimitsu and K. Oshima, *J. Am. Chem. Soc.*, 2008, **130**, 5048.
5. K. Kobayashi, H. Naka, A. E. H. Wheatley and Y. Kondo, *Org. Lett.*, 2008, **10**, 3375.
6. J. Chen, T. Xi, X. Ren, B. Cheng, J. Guo and Z. Lu, *Org. Chem. Front.*, 2014, **1**, 1306.
7. M. N. Alam, M. L. K and P. Maity, *Org. Biomol. Chem.*, 2018, **16**, 8922.
8. P. A. Evans and S. Oliver, *Org. Lett.*, 2013, **15**, 5626.
9. F. Chen, F.-F. Zhu, M. Zhang, R.-H. Liu, W. Yu and B. Han, *Org. Lett.*, 2017, **19**, 3255.
10. N. Miyaura, T. Yanagi and A. Suzuki, *Synth. Commun.*, 1981, **11**, 513.
11. K. E. Kim, J. Li, R. H. Grubbs and B. M. Stoltz, *J. Am. Chem. Soc.*, 2016, **138**, 13179.
12. Gaussian 09, Revision A.02, M. J. Frisch, G. W. Trucks, H. B. Schlegel, G. E. Scuseria, M. A. Robb, J. R. Cheeseman, G. Scalmani, V. Barone, B. Mennucci, G. A. Petersson, H. Nakatsuji, M. Caricato, X. Li, H. P. Hratchian, A. F. Izmaylov, J. Bloino, G. Zheng, J. L. Sonnenberg, M. Hada, M. Ehara, K. Toyota, R. Fukuda, J. Hasegawa, M. Ishida, T. Nakajima, Y. Honda, O. Kitao, H. Nakai, T. Vreven, J. A. Montgomery, Jr., J. E. Peralta, F. Ogliaro, M. Bearpark, J. J. Heyd, E. Brothers, K. N. Kudin, V. N. Staroverov, R. Kobayashi, J. Normand, K. Raghavachari, A. Rendell, J. C. Burant, S. S. Iyengar, J. Tomasi, M. Cossi, N. Rega, J. M. Millam, M. Klene, J. E. Knox, J. B. Cross, V. Bakken, C. Adamo, J. Jaramillo, R. Gomperts, R. E. Stratmann, O. Yazyev, A. J. Austin, R. Cammi, C. Pomelli, J. W. Ochterski, R. L. Martin, K. Morokuma, V. G. Zakrzewski, G. A. Voth, P. Salvador, J. J. Dannenberg, S. Dapprich, A. D. Daniels, O. Farkas, J. B. Foresman, J. V. Ortiz, J. Cioslowski, and D. J. Fox, Gaussian, Inc., Wallingford CT, 2009.
13. P. C. Hariharan and J. A. Pople, *Theor. Chim. Acta*, 1973, **28**, 213.
14. (a) P. J. Hay and W. R. Wadt, *J. Chem. Phys.*, 1985, **82**, 270; (b) W. R. Wadt and P. J. Hay, *J. Chem. Phys.*, 1985, **82**, 284; (c) P. J. Hay and W. R. Wadt, *J. Chem. Phys.*, 1985, **82**, 299.
15. K. Fukui, *Acc. Chem. Res.*, 1981, **14**, 363; (b) T. H. Dunning, Jr., P. J. Hay in *Modern Theoretical Chemistry* (Ed: H. F. Schaefer, III.), Plenum Press, New York, 1977, pp.1-28.
16. (a) K. Fukui, *J. Phys. Chem.*, 1970, **74**, 4161; (b) C. Gonzalez and H. B. Schlegel, *J. Chem. Phys.*, 1989, **90**, 2154. (c) C. Gonzalez and H. B. Schlegel, *J. Phys. Chem.*, 1990, **94**, 5523.
17. D. Andrae, U. Haeussermann, M. Dolg, H. Stoll and H. Preuss, *Theor. Chim. Acta*, 1990, **77**, 123.
18. A. V. Marenich, C. J. Cramer and D. G. Truhlar, *J. Phys. Chem. B*, 2009, **113**, 6378.
